# Supplementary material for: TRIM24 controls induction of latent HIV-1 by stimulating transcriptional elongation
Source: Research Square preprint supplement (doi:10.21203/rs.3.rs-1357296/v1), 2022-02-22
Supplement: Supplementary file 1 [file 1e1223975353a89bb65b8bde.xlsx]

## Sheet: KB1 vs KB1 PMA_Ion DEG
Gene ID	Mean normalized counts	FC log2	log2 FC standard error	Wald statistic	p-value	Adjusted p-value
BAHCC1	1835.8	-4.39722	0.149955	-29.3235	5.20227e-189	1.829e-186
MIR210HG-2	26.285	-4.3726	0.668735	-6.53862	6.20891e-11	4.44619e-10
CNR2	189.705	-4.11218	0.273714	-15.0236	5.14173e-51	2.40412e-49
RGPD1	13.2942	-4.0456	0.641571	-6.30578	2.86753e-10	1.92241e-09
HOXA13	52.5933	-3.9588	0.476479	-8.30846	9.69533e-17	1.11408e-15
RAG2	64.1801	-3.91737	0.356084	-11.0013	3.76857e-28	8.24126e-27
CEBPE	493.882	-3.83504	0.2785	-13.7703	3.84564e-43	1.40331e-41
ABCG1	979.526	-3.808	0.234406	-16.2453	2.41096e-59	1.39484e-57
PFKFB4	1218.84	-3.76058	0.488611	-7.69647	1.39875e-14	1.3741e-13
TLDC1	854.515	-3.75448	0.22377	-16.7783	3.5195e-63	2.25767e-61
MIR210HG	78.5666	-3.68073	0.716696	-5.13569	2.81111e-07	1.3632e-06
AFAP1L2	24.1931	-3.63878	0.510596	-7.12653	1.02928e-12	8.74006e-12
RAB33A	362.947	-3.53105	0.268568	-13.1477	1.75519e-39	5.79214e-38
LINC00528	219.276	-3.52841	0.215614	-16.3645	3.43001e-60	2.02282e-58
SOSTDC1	133.974	-3.4961	0.246658	-14.1739	1.32924e-45	5.28285e-44
RAB37	641.851	-3.45364	0.158044	-21.8524	7.37916e-106	9.36846e-104
LRRC38	48.1979	-3.41197	0.367559	-9.2828	1.65075e-20	2.45159e-19
TMEM26	17.2893	-3.40398	0.571526	-5.95596	2.5855e-09	1.57456e-08
LOC101927834	19.5167	-3.39373	0.56055	-6.0543	1.41034e-09	8.80294e-09
SMAD6	180.19	-3.39045	0.216094	-15.6897	1.78018e-55	9.37904e-54
GIMAP4	1823.17	-3.39025	0.162473	-20.8666	1.07797e-96	1.20905e-94
ARHGAP29	72.5925	-3.34771	0.342605	-9.77134	1.49459e-22	2.49535e-21
SVILP1	21.5265	-3.34245	0.503147	-6.64308	3.072e-11	2.27654e-10
GP5	72.9472	-3.27587	0.307447	-10.6551	1.65127e-26	3.33944e-25
ADCYAP1	156.857	-3.26868	0.213995	-15.2745	1.13068e-52	5.54183e-51
RGPD3	91.2781	-3.24774	0.271424	-11.9656	5.38126e-33	1.4489e-31
LOC101928004	100.197	-3.23274	0.283458	-11.4046	3.9637e-30	9.52225e-29
TET1	487.087	-3.2287	0.275862	-11.7041	1.21501e-31	3.10235e-30
FBLN5	24.4217	-3.2225	0.5116	-6.29886	2.99847e-10	2.00798e-09
ARHGEF17	76.9048	-3.19237	0.376365	-8.48211	2.21138e-17	2.65802e-16
LMO1	144.967	-3.09184	0.284111	-10.8825	1.39625e-27	2.99252e-26
ZNF521	98.499	-3.06932	0.249118	-12.3208	7.0034e-35	2.0195e-33
SRGAP3	68.4685	-3.06222	0.296241	-10.3369	4.79662e-25	9.13456e-24
FLJ33581	22.0186	-3.04455	0.468014	-6.50526	7.75585e-11	5.50009e-10
MIR3186	7.71311	-3.0018	0.660395	-4.54546	5.48153e-06	2.2359e-05
RAP1GAP2	372.535	-2.99829	0.17984	-16.672	2.0959e-62	1.31223e-60
ACKR3	23.4223	-2.98988	0.485188	-6.16231	7.16928e-10	4.61835e-09
ACVR2B-AS1	53.0592	-2.9579	0.386158	-7.65981	1.86203e-14	1.80784e-13
SBK1	1585.16	-2.94784	0.272421	-10.8209	2.74063e-27	5.75911e-26
PTCHD4	78.6625	-2.92622	0.275502	-10.6214	2.36975e-26	4.76086e-25
CD1D	1277.43	-2.91728	0.121977	-23.9167	2.05267e-126	3.15352e-124
KCNA3	887.734	-2.89802	0.243525	-11.9003	1.17899e-32	3.11478e-31
KIF19	17.2289	-2.89378	0.565059	-5.12119	3.03611e-07	1.463e-06
BHLHE23	68.3761	-2.88862	0.294665	-9.80305	1.09235e-22	1.8372e-21
GIMAP1	653.947	-2.872	0.198243	-14.4873	1.45727e-47	6.19576e-46
CORO2A	293.99	-2.84061	0.247743	-11.4659	1.95629e-30	4.74335e-29
2022-09-06	825.213	-2.83926	0.225939	-12.5665	3.22791e-36	9.81907e-35
GPR146	616.448	-2.82124	0.651532	-4.33016	1.48999e-05	5.72991e-05
OSBPL5	742.238	-2.81611	0.235585	-11.9537	6.209e-33	1.66686e-31
POU3F2	221.544	-2.80267	0.219428	-12.7726	2.33169e-37	7.37509e-36
MOCS1	1508.5	-2.80167	0.203672	-13.7558	4.69955e-43	1.70809e-41
ZNF652	397.812	-2.79636	0.213136	-13.1201	2.52758e-39	8.31101e-38
DBP	244.939	-2.79616	0.281555	-9.93114	3.04748e-23	5.28595e-22
LRRC20	441.566	-2.79516	0.140513	-19.8925	4.72174e-88	4.6661e-86
LOC102724970	3.94518	-2.77108	0.736306	-3.76349	0.000167561	0.000545081
MTL5	155.519	-2.77106	0.238224	-11.6322	2.82847e-31	7.0739e-30
LOC102723730	37.9204	-2.76577	0.472569	-5.85262	4.83886e-09	2.85368e-08
PPFIA4	958.467	-2.76519	0.54581	-5.06622	4.05801e-07	1.92315e-06
CHFR	12.301	-2.75707	0.587484	-4.69301	2.69218e-06	1.14302e-05
DDIT4	1533.04	-2.75503	0.565694	-4.87018	1.11496e-06	5.00338e-06
NDST3	325.629	-2.75312	0.302315	-9.10679	8.48563e-20	1.20353e-18
ANXA2R	398.793	-2.74598	0.242617	-11.3182	1.06677e-29	2.52954e-28
NFIA	31.9505	-2.73954	0.416206	-6.58218	4.63604e-11	3.36467e-10
B3GNT3	3.94946	-2.72908	0.738054	-3.69767	0.000217587	0.000693502
LOC101929698	8.23972	-2.72453	0.662112	-4.1149	3.8734e-05	0.000139561
RAB3D	458.441	-2.72337	0.138164	-19.7111	1.73188e-86	1.67525e-84
GIMAP7	943.022	-2.71233	0.111431	-24.3409	7.23536e-131	1.18104e-128
MIR29C	13.2791	-2.71034	0.577035	-4.697	2.64005e-06	1.12141e-05
BCL11A	531.974	-2.69821	0.141992	-19.0025	1.62726e-80	1.47275e-78
RP11-445H22.3	314.684	-2.69346	0.164024	-16.4212	1.34952e-60	8.0627e-59
MOB3A	2043.68	-2.68587	0.219553	-12.2334	2.06181e-34	5.86221e-33
C16orf74	251.302	-2.68172	0.303153	-8.84609	9.06396e-19	1.19991e-17
LINC00669	98.1463	-2.6799	0.283011	-9.46923	2.81921e-21	4.36787e-20
CASC14	64.5372	-2.67066	0.324513	-8.22974	1.87615e-16	2.10946e-15
YPEL1	818.397	-2.67035	0.257974	-10.3512	4.13204e-25	7.89363e-24
GCSAM	138.145	-2.66876	0.346251	-7.70758	1.28228e-14	1.26443e-13
SERINC5	3966.33	-2.65496	0.213182	-12.454	1.33008e-35	3.94748e-34
DUSP5P1	120.209	-2.64772	0.267569	-9.89547	4.35547e-23	7.49781e-22
ALDH1B1	82.7178	-2.64608	0.360309	-7.34393	2.07418e-13	1.85338e-12
AMPD3	407.473	-2.63856	0.219744	-12.0074	3.24747e-33	8.82172e-32
RORB	300.394	-2.63794	0.208137	-12.674	8.23722e-37	2.5481e-35
SASH3	1511.92	-2.63044	0.130791	-20.1118	5.81366e-90	5.97109e-88
FAM53B	1332.11	-2.62352	0.112448	-23.331	2.14713e-120	3.01952e-118
C11orf74	5.07961	-2.61333	0.718598	-3.63671	0.000276142	0.000862684
KLHL32	52.5412	-2.61276	0.346322	-7.54429	4.54744e-14	4.27876e-13
DAAM2	1247.72	-2.5784	0.220257	-11.7063	1.18305e-31	3.02498e-30
ANKZF1	1877.61	-2.57744	0.437474	-5.89164	3.8238e-09	2.2808e-08
DHRS13	338.863	-2.56293	0.147808	-17.3396	2.36432e-67	1.64979e-65
KDM4B	2183.74	-2.5481	0.2289	-11.1319	8.77153e-29	1.97246e-27
CNN2	2601.32	-2.54458	0.0911486	-27.9169	1.66556e-171	4.71375e-169
FAM13A	95.6673	-2.53748	0.280724	-9.03905	1.5804e-19	2.20725e-18
LEF1	9209.1	-2.52761	0.143411	-17.6249	1.58544e-69	1.16405e-67
RAB26	150.923	-2.52158	0.328384	-7.67875	1.60648e-14	1.56638e-13
TMEM169	71.4274	-2.51376	0.278133	-9.03796	1.59617e-19	2.22756e-18
KANK4	20.3238	-2.51132	0.520464	-4.82517	1.39886e-06	6.19674e-06
ZFP36L2	3492.85	-2.50892	0.231061	-10.8582	1.82223e-27	3.86473e-26
ZMYM3	1261.2	-2.50869	0.196662	-12.7564	2.87227e-37	9.0536e-36
MYO16	48.3044	-2.5018	0.325432	-7.68761	1.49904e-14	1.46553e-13
CREB3L3	53.9681	-2.49106	0.3562	-6.99344	2.68233e-12	2.18142e-11
PI16	632.302	-2.47343	0.274641	-9.00605	2.13617e-19	2.95412e-18
CD34	211.169	-2.46918	0.264016	-9.35236	8.57136e-21	1.29398e-19
FLI1	1139.5	-2.46092	0.108518	-22.6776	7.45792e-114	9.88012e-112
SPTBN1	11575.8	-2.44748	0.145132	-16.8639	8.29722e-64	5.43691e-62
SYK	2325.41	-2.44735	0.0897397	-27.2716	9.21066e-164	2.27553e-161
PROCA1	41.1461	-2.44692	0.412527	-5.93153	3.00133e-09	1.8121e-08
MESP2	7.39761	-2.44118	0.636821	-3.83338	0.000126394	0.000419294
HES7	55.2725	-2.44039	0.308933	-7.89943	2.80187e-15	2.91044e-14
LOC102723784	5.27167	-2.44018	0.694237	-3.5149	0.000439913	0.00132649
PTGER3	304.355	-2.42557	0.200758	-12.0821	1.31356e-33	3.63306e-32
LINC00173	11.5285	-2.4251	0.606546	-3.9982	6.38255e-05	0.000223108
HSD17B13	6.52021	-2.41567	0.720283	-3.35378	0.000797146	0.0022871
TBX1	117.916	-2.41337	0.291847	-8.26929	1.34754e-16	1.53017e-15
HOXA4	23.4567	-2.41328	0.489848	-4.92659	8.36774e-07	3.81208e-06
ESPNP	23.1477	-2.41307	0.475223	-5.07777	3.81898e-07	1.81962e-06
LOC100507520	257.348	-2.41184	0.264325	-9.12452	7.20538e-20	1.02752e-18
CHAD	19.9995	-2.41018	0.509896	-4.7268	2.28084e-06	9.77457e-06
AARD	92.8968	-2.41006	0.257421	-9.36234	7.79923e-21	1.1823e-19
PPARA	706.262	-2.40803	0.156185	-15.4178	1.24204e-53	6.27267e-52
CCDC19	7.5299	-2.40433	0.652562	-3.68445	0.0002292	0.000726716
PGPEP1	453.065	-2.39901	0.187318	-12.8072	1.49457e-37	4.76854e-36
EGLN1	1592.17	-2.38368	0.239822	-9.93937	2.80605e-23	4.88573e-22
LOC400682	6.10452	-2.3812	0.666848	-3.57082	0.000355865	0.00108959
C21orf128	2.95991	-2.38075	0.744885	-3.19612	0.00139287	0.00382005
CHURC1-FNTB	2.94659	-2.38034	0.744872	-3.19563	0.00139525	0.00382544
PPM1H	29.1701	-2.37482	0.388287	-6.11615	9.58655e-10	6.10029e-09
SLC15A2	96.5585	-2.36301	0.30096	-7.85157	4.10877e-15	4.22954e-14
RASGRP2	706.502	-2.3506	0.137733	-17.0663	2.64378e-65	1.79013e-63
CDCA7	3804.82	-2.34487	0.122296	-19.1737	6.14267e-82	5.67173e-80
KLF15	2.79058	-2.34439	0.745149	-3.1462	0.00165406	0.00445552
LINC00051	53.3132	-2.34187	0.315576	-7.42095	1.16285e-13	1.05978e-12
C20orf197	216.949	-2.3335	0.174418	-13.3787	8.04972e-41	2.7767e-39
LOC101927929	11.2965	-2.3323	0.583722	-3.99555	6.4543e-05	0.000225401
TCF12	4781.29	-2.33026	0.141841	-16.4287	1.19274e-60	7.17295e-59
SLC6A16	16.9848	-2.32409	0.471065	-4.93368	8.06938e-07	3.68719e-06
GSDMB	278.297	-2.31538	0.275055	-8.41787	3.83387e-17	4.53075e-16
GPR157	84.9881	-2.31533	0.295308	-7.8404	4.49108e-15	4.61011e-14
LRRC45	434.609	-2.3152	0.138121	-16.7621	4.61758e-63	2.9312e-61
RGPD2	28.9882	-2.3138	0.381719	-6.06152	1.3484e-09	8.43648e-09
TMEM187	135.604	-2.30852	0.284747	-8.10727	5.17712e-16	5.62377e-15
CD244	87.004	-2.30818	0.281666	-8.19476	2.51084e-16	2.79386e-15
HOXD-AS1	23.9809	-2.30663	0.430742	-5.35502	8.55478e-08	4.40311e-07
NPR3	3.75908	-2.30317	0.7288	-3.16022	0.00157652	0.00426865
FZD2	149.102	-2.29464	0.263315	-8.71445	2.92183e-18	3.72503e-17
SLC17A9	21.9407	-2.29224	0.448637	-5.10934	3.23285e-07	1.55126e-06
S1PR5	81.4693	-2.28461	0.253893	-8.99829	2.29255e-19	3.1632e-18
THAP8	168.333	-2.27971	0.22078	-10.3257	5.39182e-25	1.02148e-23
HOXA3	49.0347	-2.27964	0.383443	-5.94519	2.76137e-09	1.67441e-08
GKAP1	262.707	-2.27489	0.235134	-9.67484	3.85686e-22	6.31254e-21
LOC102724536	39.1042	-2.27313	0.427801	-5.31352	1.07529e-07	5.48814e-07
PIGZ	159.562	-2.27239	0.233199	-9.7444	1.94925e-22	3.22791e-21
SLC14A1	39.919	-2.26478	0.530972	-4.26534	1.99599e-05	7.51765e-05
MLLT3	569.246	-2.26145	0.190719	-11.8575	1.9681e-32	5.15485e-31
LOC113230	100.432	-2.26026	0.312144	-7.24109	4.45083e-13	3.88587e-12
RDH16	3.60812	-2.25721	0.729537	-3.09403	0.00197455	0.0052355
TOB1-AS1	26.1223	-2.25635	0.456079	-4.94727	7.52608e-07	3.45188e-06
GIMAP5	38.8566	-2.2549	0.34809	-6.47793	9.2989e-11	6.55873e-10
ASB13	65.4306	-2.25452	0.31047	-7.26163	3.82452e-13	3.3583e-12
DAB1	41.0797	-2.25367	0.342717	-6.57591	4.83572e-11	3.50125e-10
AQPEP	7.53312	-2.24383	0.632905	-3.54528	0.0003922	0.00119265
LINC00928	5.23287	-2.24359	0.718696	-3.12175	0.00179779	0.00481006
RGMA	112.327	-2.24128	0.226459	-9.89704	4.28768e-23	7.39503e-22
RP11-439L8.4	111.746	-2.23905	0.405457	-5.52228	3.3462e-08	1.79927e-07
LOC101927437	5.88571	-2.23781	0.692228	-3.23276	0.00122601	0.0034043
DENND3	1019.63	-2.23329	0.185068	-12.0674	1.57083e-33	4.33805e-32
FUT11	426.027	-2.23209	0.520973	-4.28446	1.83187e-05	6.94244e-05
TXK	18.046	-2.22473	0.477674	-4.65742	3.20202e-06	1.34728e-05
C10orf25	342.783	-2.22278	0.150381	-14.781	1.94137e-49	8.67778e-48
LOC730101	237.008	-2.2142	0.244532	-9.05486	1.36738e-19	1.91706e-18
SLC25A29	1525.09	-2.21306	0.179713	-12.3144	7.57894e-35	2.18202e-33
JAM3	7429.9	-2.21021	0.283094	-7.80733	5.84139e-15	5.9329e-14
SELPLG	883.104	-2.20647	0.106516	-20.7149	2.54482e-95	2.75292e-93
RP11-61I13.3	256.056	-2.20402	0.265142	-8.3126	9.36288e-17	1.07791e-15
LOC100130899	40.7733	-2.20279	0.356307	-6.18228	6.31834e-10	4.09472e-09
LDLRAP1	208.01	-2.19322	0.18447	-11.8893	1.34451e-32	3.54184e-31
BIN1	469.907	-2.18907	0.129589	-16.8924	5.11499e-64	3.36375e-62
THRA	281.462	-2.18865	0.158177	-13.8367	1.53063e-43	5.69917e-42
SLC37A2	57.5284	-2.18364	0.387622	-5.63343	1.7666e-08	9.81375e-08
P2RX5	144.802	-2.16803	0.201298	-10.7703	4.75664e-27	9.82609e-26
MYCL	74.6428	-2.16728	0.251288	-8.62467	6.42759e-18	7.98296e-17
KCTD11	62.4874	-2.16331	0.479633	-4.51034	6.47239e-06	2.61892e-05
LOC101929174	11.815	-2.16289	0.54913	-3.93876	8.19043e-05	0.000280828
CERKL	296.535	-2.16198	0.163341	-13.236	5.43513e-40	1.84351e-38
FAM46C	1040.2	-2.16073	0.146151	-14.7842	1.85143e-49	8.29603e-48
MGAT4A	3304.13	-2.15994	0.225903	-9.56138	1.16193e-21	1.85362e-20
KC6	15.3883	-2.15951	0.558348	-3.86768	0.000109875	0.000367632
ZNF467	68.9101	-2.15944	0.652458	-3.3097	0.000933966	0.00264807
AP001258.4	50.6789	-2.1585	0.315531	-6.84085	7.87249e-12	6.17703e-11
GAS2L1	1362.14	-2.15709	0.154901	-13.9256	4.42792e-44	1.66566e-42
SLC23A1	285.267	-2.14835	0.159184	-13.496	1.64991e-41	5.78958e-40
SLC29A4	533.91	-2.14452	0.245059	-8.75106	2.11358e-18	2.72116e-17
HHIP	886.227	-2.14132	0.1147	-18.6689	8.86188e-78	7.7149e-76
C1QTNF3	41.295	-2.14	0.361249	-5.92389	3.14411e-09	1.89393e-08
LOC102724942	7.42634	-2.13442	0.650033	-3.28356	0.00102506	0.0028871
EFNA3	348.874	-2.13303	0.580338	-3.67549	0.000237391	0.000750213
TRIM46	163.881	-2.1325	0.253442	-8.41417	3.95681e-17	4.67303e-16
RCN3	189.164	-2.13089	0.192803	-11.0521	2.14072e-28	4.73236e-27
ZNF395	1403.56	-2.13021	0.218015	-9.77096	1.50029e-22	2.50258e-21
AK4	514.344	-2.12634	0.443556	-4.79385	1.63613e-06	7.17478e-06
MYO7B	29328	-2.11737	0.184691	-11.4644	1.99169e-30	4.8228e-29
VPS26B	4701.35	-2.11491	0.208496	-10.1437	3.53475e-24	6.41093e-23
C2orf15	47.2129	-2.11149	0.310655	-6.79688	1.06909e-11	8.29591e-11
BCL11B	1775.3	-2.10922	0.116975	-18.0314	1.10522e-72	8.48979e-71
C15orf52	26.1963	-2.10919	0.420817	-5.01213	5.38322e-07	2.51318e-06
ADRB1	33.9012	-2.10717	0.365762	-5.76104	8.35991e-09	4.80616e-08
LOC100132874	4.24937	-2.10241	0.716215	-2.93544	0.00333075	0.00841409
FGD5	481.535	-2.09868	0.21133	-9.93082	3.05733e-23	5.29803e-22
HHIP-AS1	666.697	-2.09627	0.151524	-13.8345	1.57803e-43	5.86372e-42
LOC101926907	7.58967	-2.08852	0.611089	-3.4177	0.000631532	0.00184436
ST3GAL4-AS1	54.6582	-2.08805	0.298013	-7.00659	2.44205e-12	1.99311e-11
ASCL4	2.46649	-2.08668	0.745941	-2.79738	0.00515188	0.0124668
G0S2	2.95404	-2.08511	0.745335	-2.79754	0.00514928	0.0124622
TERT	729.755	-2.08456	0.134487	-15.5002	3.46013e-54	1.77691e-52
KCNH2	1391.5	-2.08181	0.150614	-13.8221	1.87408e-43	6.92159e-42
RNF207	34.7656	-2.07995	0.401687	-5.17805	2.24219e-07	1.09838e-06
LGALS12	2.30254	-2.0757	0.74602	-2.78236	0.00539647	0.0130002
PGAM1P5	7.39807	-2.0714	0.610526	-3.39281	0.000691805	0.00200564
GPC4	5.91287	-2.06599	0.667926	-3.09314	0.00198054	0.00524909
DICER1-AS1	26.7737	-2.06343	0.491119	-4.20149	2.65159e-05	9.79322e-05
ATG9B	413.621	-2.06169	0.305816	-6.7416	1.56647e-11	1.19276e-10
SLC9A3R2	357.429	-2.06156	0.174736	-11.7982	3.98829e-32	1.03571e-30
BTN3A3	196.082	-2.05427	0.204447	-10.0479	9.38492e-24	1.66094e-22
LINC00663	21.4581	-2.05402	0.543543	-3.77895	0.00015749	0.000515068
ZNF439	5.2343	-2.05043	0.703505	-2.91459	0.0035616	0.00893064
KCNQ5	116.896	-2.05037	0.296284	-6.92028	4.5076e-12	3.60174e-11
RORA	601.197	-2.04985	0.484448	-4.23131	2.32336e-05	8.6632e-05
LOC102724660	50.9224	-2.04946	0.465324	-4.40437	1.06093e-05	4.16849e-05
FAM65A	1198.28	-2.04839	0.149523	-13.6995	1.02278e-42	3.70265e-41
LINC00563	13.5101	-2.04729	0.507485	-4.03419	5.47917e-05	0.000193192
F2R	133.608	-2.04427	0.235252	-8.68968	3.63459e-18	4.61122e-17
RCSD1	1611.87	-2.04025	0.135106	-15.1011	1.59209e-51	7.5211e-50
LRMP	182.432	-2.03381	0.217108	-9.36771	7.41209e-21	1.12642e-19
SPINT1	392.03	-2.03376	0.142253	-14.2967	2.29312e-46	9.35778e-45
ANTXRLP1	37.4621	-2.03266	0.334619	-6.07457	1.24319e-09	7.80494e-09
LINC00861	57.2247	-2.03259	0.365988	-5.55371	2.79663e-08	1.51401e-07
ANKFN1	6.41142	-2.03069	0.636537	-3.19022	0.00142166	0.00389011
LOC101928502	10.0059	-2.02977	0.573781	-3.53753	0.000403891	0.00122575
TENM1	57.8303	-2.02826	0.319447	-6.34929	2.16313e-10	1.46848e-09
LOC102723572	2.30318	-2.02067	0.745385	-2.7109	0.00671002	0.0158083
ZNF8	26.4402	-2.01932	0.424166	-4.76067	1.92954e-06	8.35723e-06
HSPA4L	402.135	-2.01816	0.145476	-13.8728	9.25798e-44	3.47545e-42
LIMS2	785.43	-2.01667	0.229551	-8.78529	1.55964e-18	2.02942e-17
FAM78A	1042.94	-2.01632	0.110619	-18.2276	3.1168e-74	2.49918e-72
LOC100129055	4.92417	-2.01613	0.699413	-2.8826	0.00394404	0.00979686
NT5M	337.905	-2.00728	0.185607	-10.8147	2.93212e-27	6.15443e-26
ABCB10	2244.32	-2.00686	0.138868	-14.4516	2.44784e-47	1.03591e-45
NRROS	945.703	-2.00538	0.121952	-16.4441	9.24675e-61	5.57918e-59
C14orf132	269.887	-1.99924	0.176393	-11.334	8.90463e-30	2.11972e-28
TTC16	109.353	-1.99746	0.308478	-6.47523	9.46706e-11	6.67477e-10
LIME1	1318.55	-1.99537	0.157031	-12.7069	5.41717e-37	1.69005e-35
RHPN1	1385.96	-1.9888	0.150753	-13.1925	9.69644e-40	3.25865e-38
STK32C	75.7202	-1.98878	0.261286	-7.61149	2.70949e-14	2.59528e-13
C1orf204	12.5175	-1.98876	0.544474	-3.65262	0.000259574	0.000814451
TUBA3FP	8.04107	-1.98807	0.612769	-3.2444	0.00117697	0.00327909
FGFR3	431.953	-1.98471	0.304431	-6.5194	7.05882e-11	5.03039e-10
TMEM63A	633.43	-1.98442	0.229845	-8.63371	5.93925e-18	7.39655e-17
ATP2B3	267.643	-1.97836	0.167906	-11.7826	4.80079e-32	1.23966e-30
NCR2	22.7222	-1.97686	0.398166	-4.96491	6.8734e-07	3.16443e-06
GLCCI1	457.027	-1.9723	0.21265	-9.27485	1.7787e-20	2.63732e-19
LOC101928806	22.748	-1.96706	0.40382	-4.87112	1.10967e-06	4.9833e-06
ACSF3	3126.55	-1.96352	0.173249	-11.3335	8.95805e-30	2.12966e-28
WT1	298.042	-1.9606	0.22262	-8.80697	1.28573e-18	1.68138e-17
TINAGL1	5.72887	-1.96057	0.687085	-2.85346	0.0043246	0.0106639
KIAA1257	25.8297	-1.96026	0.383111	-5.11668	3.10954e-07	1.49484e-06
RENBP	46.3174	-1.95895	0.333459	-5.87464	4.23767e-09	2.52027e-08
VPS37D	121.055	-1.95858	0.308334	-6.35214	2.12347e-10	1.44317e-09
BTBD11	36.2706	-1.95401	0.460479	-4.24344	2.20118e-05	8.23617e-05
LOC102724759	2.79142	-1.94983	0.739344	-2.63724	0.00835834	0.0192719
C1orf233	243.421	-1.94968	0.184617	-10.5607	4.53451e-26	8.99132e-25
AFF1	1670.03	-1.94924	0.147094	-13.2517	4.41356e-40	1.50258e-38
TFDP2	3219.74	-1.94886	0.128997	-15.1078	1.43883e-51	6.8147e-50
ARID3A	432.544	-1.94796	0.177615	-10.9673	5.48827e-28	1.19306e-26
ACAP1	3010.67	-1.94656	0.128824	-15.1103	1.38606e-51	6.5818e-50
ZFYVE28	19.3765	-1.94651	0.457954	-4.25045	2.13338e-05	8.00213e-05
FAM117B	512.506	-1.94458	0.162763	-11.9473	6.7076e-33	1.79807e-31
EPHA3	1836.83	-1.94384	0.115865	-16.7768	3.60662e-63	2.30546e-61
ATP2B4	3605.37	-1.94378	0.0835885	-23.2542	1.29108e-119	1.8018e-117
MKNK2	6320.98	-1.94262	0.401996	-4.83245	1.34863e-06	5.98439e-06
LOC101927789	36.8104	-1.94218	0.377474	-5.14519	2.67248e-07	1.30046e-06
CD8A	66.8364	-1.93915	0.279854	-6.92916	4.23349e-12	3.38865e-11
PDE11A	17.5865	-1.93874	0.472454	-4.10355	4.06864e-05	0.000146164
ZC3H6	266.988	-1.93857	0.50209	-3.86099	0.000112929	0.000377297
TNRC6C	776.928	-1.93619	0.129928	-14.902	3.20048e-50	1.46644e-48
INPP4A	2226.94	-1.93382	0.101593	-19.035	8.7541e-81	7.96231e-79
RP4-777D9.2	3.92163	-1.93255	0.727751	-2.65551	0.00791887	0.0183582
KCNIP3	13.6433	-1.93032	0.524697	-3.67893	0.000234218	0.000741337
LOC101929385	17.6031	-1.92943	0.527948	-3.65458	0.000257605	0.00080892
KIAA1211	65.9621	-1.92775	0.304616	-6.32847	2.47609e-10	1.67226e-09
NPHP3-ACAD11	25.9543	-1.92615	0.429066	-4.48916	7.15044e-06	2.86488e-05
AFF2	918.382	-1.92093	0.149618	-12.8389	9.92279e-38	3.18261e-36
CHODL	2.95497	-1.92059	0.741512	-2.5901	0.00959477	0.02188
ZNF280D	852.912	-1.91625	0.119586	-16.0241	8.67625e-58	4.89566e-56
SOX4	3754.64	-1.91568	0.128676	-14.8877	3.96111e-50	1.80142e-48
LOC101926931	14.6272	-1.91421	0.537916	-3.55857	0.000372873	0.00113747
LOC100506379	7.9096	-1.91412	0.623014	-3.07236	0.00212375	0.00559942
C5orf56	94.2575	-1.91379	0.245551	-7.79385	6.49993e-15	6.56528e-14
HEY2	111.226	-1.91131	0.214174	-8.9241	4.4934e-19	6.09862e-18
LOC101927806	17.1424	-1.90879	0.448314	-4.25772	2.06522e-05	7.76399e-05
ATP2C2	71.6078	-1.90746	0.361483	-5.27678	1.31473e-07	6.66182e-07
TRPM2-AS	3.46095	-1.90551	0.716725	-2.65864	0.00784559	0.0182091
CHST12	788.275	-1.90202	0.108948	-17.458	2.99233e-68	2.11219e-66
GPR162	125.784	-1.9004	0.352905	-5.38501	7.24421e-08	3.75499e-07
LOC101928714	21.7232	-1.89845	0.46585	-4.07524	4.59664e-05	0.000163717
SBSPON	5.11407	-1.89669	0.670036	-2.83073	0.00464422	0.011366
IKZF2	2629.65	-1.89445	0.141187	-13.418	4.7425e-41	1.64833e-39
PAQR4	633.682	-1.8937	0.127106	-14.8986	3.36468e-50	1.53783e-48
LOC102723543	5.59777	-1.89098	0.695257	-2.71983	0.00653163	0.0154378
ERP27	135.72	-1.88957	0.22196	-8.51313	1.69293e-17	2.05513e-16
APOBEC2	6.74536	-1.88091	0.633403	-2.96954	0.00298251	0.00761964
TTC28	217.221	-1.88053	0.201081	-9.35212	8.59115e-21	1.29483e-19
KISS1R	12.0779	-1.87886	0.571373	-3.28833	0.00100785	0.00284475
HOXA11	10.5261	-1.87824	0.540114	-3.47748	0.000506148	0.00150903
RCOR2	255.071	-1.87769	0.270041	-6.95335	3.56714e-12	2.87288e-11
ITGA4	9586.53	-1.87462	0.116109	-16.1453	1.22576e-58	7.02486e-57
RP11-305P22.9	18.2751	-1.87316	0.495803	-3.77804	0.000158068	0.000516588
MANBA	292.601	-1.87224	0.189902	-9.85896	6.26923e-23	1.06816e-21
STARD4-AS1	128.356	-1.87191	0.307539	-6.08675	1.15222e-09	7.25877e-09
MXI1	506.277	-1.86994	0.278427	-6.71611	1.86641e-11	1.41701e-10
PIDD	1185.86	-1.86973	0.165717	-11.2827	1.59714e-29	3.73867e-28
RP11-611D20.2	28.7816	-1.86855	0.395113	-4.72916	2.2545e-06	9.67528e-06
MTRNR2L8	10.0232	-1.86452	0.583576	-3.19499	0.00139836	0.00383165
INPP5D	351.482	-1.86374	0.229979	-8.10397	5.31922e-16	5.77128e-15
C1orf229	4.27786	-1.86295	0.699897	-2.66175	0.00777359	0.0180603
P2RX1	63.5831	-1.86284	0.355439	-5.24095	1.59751e-07	7.9928e-07
CABLES1	118.984	-1.86052	0.273866	-6.79354	1.09418e-11	8.47621e-11
MXD3	668.518	-1.85943	0.281101	-6.61481	3.72026e-11	2.7271e-10
FKBP1A-SDCBP2	5.09526	-1.85862	0.680476	-2.73136	0.00630737	0.014958
SREBF1	3445.57	-1.85731	0.127528	-14.5639	4.76384e-48	2.05407e-46
RASSF4	428.645	-1.85691	0.164677	-11.2761	1.72247e-29	4.01661e-28
MUM1	860.112	-1.85346	0.140164	-13.2235	6.42163e-40	2.16605e-38
LOC440570	13.3387	-1.84787	0.485912	-3.80289	0.000143019	0.000469925
KCNA6	94.9495	-1.84359	0.267161	-6.90067	5.17585e-12	4.12309e-11
CTIF	196.782	-1.8428	0.173465	-10.6235	2.3182e-26	4.66241e-25
RAB44	459.648	-1.8391	0.172883	-10.6378	1.98754e-26	4.01062e-25
PRSS53	294.633	-1.83868	0.277356	-6.62931	3.37254e-11	2.48616e-10
SIX6	795.31	-1.83841	0.105052	-17.5001	1.43073e-68	1.02175e-66
LINC01120	22.2826	-1.83597	0.502068	-3.65682	0.000255366	0.000802303
RASSF1-AS1	12.5203	-1.83517	0.499031	-3.67746	0.000235567	0.000745091
SLC9A3R1	3712.95	-1.83363	0.0875834	-20.9358	2.53019e-97	2.8731e-95
CCR8	5.74672	-1.83246	0.66177	-2.76903	0.00562242	0.0134894
RBM5-AS1	125.214	-1.8316	0.338789	-5.40632	6.43322e-08	3.35651e-07
CXXC4	63.2369	-1.83136	0.300767	-6.08896	1.13646e-09	7.1718e-09
RALGPS1	401.359	-1.82926	0.209751	-8.7211	2.75504e-18	3.53209e-17
PCYT2	850.329	-1.82369	0.120149	-15.1785	4.90795e-52	2.37373e-50
UPK1A-AS1	14.6338	-1.82075	0.532586	-3.41869	0.00062924	0.00183854
ESRP1	81.9101	-1.82065	0.232527	-7.82981	4.88597e-15	4.99024e-14
BEND5	356.727	-1.81859	0.265058	-6.86111	6.83294e-12	5.3961e-11
OAS2	461.817	-1.81788	0.129908	-13.9936	1.70482e-44	6.53407e-43
LOC728743	354.927	-1.81603	0.218446	-8.31342	9.29863e-17	1.07156e-15
LINC01011	21.2783	-1.81223	0.497423	-3.64324	0.000269226	0.000842087
FYB	2338.45	-1.81132	0.166801	-10.8592	1.80309e-27	3.83304e-26
KIAA1958	580.505	-1.81095	0.24063	-7.52584	5.23835e-14	4.90612e-13
S100Z	19.944	-1.80992	0.420502	-4.30418	1.67602e-05	6.3862e-05
LOC100128568	18.9557	-1.8073	0.469746	-3.84739	0.000119383	0.000397189
ZNF385D	4.77389	-1.80677	0.676776	-2.66967	0.0075926	0.0176735
TAL1	2668.75	-1.80245	0.100904	-17.863	2.28946e-71	1.7084e-69
KANSL1L	97.7553	-1.80071	0.286471	-6.28584	3.26087e-10	2.17336e-09
VASH2	276.059	-1.79814	0.164802	-10.9109	1.02217e-27	2.1985e-26
MYT1L	68.1032	-1.79744	0.306708	-5.86044	4.61641e-09	2.72747e-08
ACSS1	1356.37	-1.79733	0.0972153	-18.4882	2.57123e-76	2.17626e-74
BTN3A1	477.778	-1.7965	0.142426	-12.6136	1.77713e-36	5.41491e-35
PLCG1	4307.84	-1.79607	0.110485	-16.2562	2.01919e-59	1.1719e-57
MIR548AR	5.4422	-1.79509	0.703602	-2.55129	0.0107326	0.0241732
SIGLEC9	10.2383	-1.79477	0.557229	-3.22088	0.00127796	0.0035362
FAM49A	130.634	-1.79473	0.260486	-6.88992	5.58248e-12	4.43349e-11
SIPA1	1217.96	-1.79347	0.17622	-10.1775	2.49998e-24	4.57047e-23
PLEKHF1	529.988	-1.79192	0.256543	-6.98489	2.85084e-12	2.31332e-11
KANK2	742.937	-1.78908	0.123212	-14.5204	8.99608e-48	3.86071e-46
ANO5	85.1954	-1.78628	0.246747	-7.23935	4.5085e-13	3.93247e-12
FOXD2-AS1	250.933	-1.78549	0.308033	-5.79642	6.77466e-09	3.93927e-08
SAMD13	80.9311	-1.78486	0.262118	-6.80938	9.80172e-12	7.62532e-11
ADAMTS1	845.529	-1.78417	0.10471	-17.0391	4.21371e-65	2.84262e-63
UGT8	6.91125	-1.7836	0.608558	-2.93086	0.00338021	0.00852608
TRAM2	978.948	-1.78303	0.181403	-9.82914	8.43341e-23	1.42495e-21
TRNR	52.1697	-1.77845	0.369346	-4.81514	1.47094e-06	6.49404e-06
HSBP1L1	100.376	-1.77784	0.224142	-7.93176	2.1606e-15	2.25715e-14
GLRX	842.291	-1.77668	0.12738	-13.9479	3.24191e-44	1.2322e-42
KCTD16	6.40595	-1.77475	0.650286	-2.72919	0.00634908	0.0150491
ZNF496	1744.28	-1.77386	0.154589	-11.4747	1.76751e-30	4.29132e-29
AMOT	320.535	-1.77376	0.180704	-9.81583	9.62451e-23	1.6247e-21
SMIM3	453.656	-1.77231	0.123692	-14.3284	1.45329e-46	5.95717e-45
ARHGAP25	365.027	-1.77049	0.143441	-12.343	5.31645e-35	1.55264e-33
C2CD2	105.702	-1.77006	0.259593	-6.81862	9.19194e-12	7.17231e-11
KRT1	106.539	-1.7694	0.334096	-5.29609	1.1831e-07	6.01652e-07
FLJ39095	10.067	-1.76691	0.559406	-3.15855	0.00158556	0.00429185
LINC00664	1.95895	-1.76588	0.739131	-2.38914	0.0168881	0.0361362
SOAT2	92.2552	-1.75937	0.24793	-7.09623	1.28209e-12	1.07717e-11
PIK3IP1	47.9007	-1.75881	0.426815	-4.12077	3.77607e-05	0.000136242
LOC101927775	58.3788	-1.75714	0.352351	-4.98692	6.13493e-07	2.83946e-06
RP11-563J2.2	11.5039	-1.75642	0.604482	-2.90566	0.00366479	0.00916297
CCDC88C	2645.51	-1.75524	0.129378	-13.5668	6.30525e-42	2.25582e-40
MYO18A	2211.14	-1.7524	0.125266	-13.9894	1.80909e-44	6.90474e-43
POLG	10165.6	-1.75097	0.452321	-3.87107	0.000108357	0.000363082
PITPNM2	2506.99	-1.75002	0.158576	-11.0358	2.56643e-28	5.64614e-27
GIMAP8	59.166	-1.74848	0.311008	-5.62199	1.88769e-08	1.04515e-07
SPEG	413.415	-1.74788	0.221427	-7.8937	2.93347e-15	3.04023e-14
BCORP1	360.279	-1.7472	0.195423	-8.94061	3.87038e-19	5.28836e-18
ACAD8	1254.74	-1.74612	0.202227	-8.63447	5.90018e-18	7.35291e-17
XYLB	459.081	-1.74598	0.160809	-10.8575	1.83693e-27	3.8914e-26
UGT3A2	359.865	-1.74502	0.234922	-7.42808	1.10187e-13	1.00521e-12
ANXA9	34.581	-1.74501	0.33801	-5.16261	2.43535e-07	1.18855e-06
BRD3	1009.72	-1.74259	0.125	-13.9408	3.58139e-44	1.3584e-42
DHX58	233.081	-1.7419	0.217554	-8.00674	1.17787e-15	1.25197e-14
IGLL1	47.5032	-1.7417	0.347921	-5.006	5.55719e-07	2.58911e-06
ZNF250	182.762	-1.73932	0.286652	-6.06769	1.29762e-09	8.13272e-09
NOTCH3	1041.7	-1.73931	0.277909	-6.25854	3.88591e-10	2.5712e-09
MECOM	2.46795	-1.73908	0.744578	-2.33566	0.0195088	0.0410899
TBX19	12.325	-1.7385	0.552479	-3.14673	0.00165107	0.0044481
EFNA1	59.2664	-1.73709	0.312249	-5.56316	2.64937e-08	1.43769e-07
NLRC3	448.803	-1.73411	0.207658	-8.3508	6.78035e-17	7.89544e-16
DAPK1	214.887	-1.73393	0.203783	-8.50871	1.75872e-17	2.13216e-16
CACNA1H	671.206	-1.73213	0.173442	-9.98677	1.74163e-23	3.05571e-22
KIAA0586	660.606	-1.73038	0.145049	-11.9296	8.29537e-33	2.21073e-31
ETV6	332.6	-1.72985	0.141759	-12.2028	3.00374e-34	8.50067e-33
LOC101927070	103.57	-1.72955	0.231766	-7.46249	8.49036e-14	7.79612e-13
DTL	2577.47	-1.7262	0.125362	-13.7697	3.87687e-43	1.41189e-41
FAM86A	228.925	-1.72514	0.255841	-6.743	1.55148e-11	1.18283e-10
C9orf9	464.376	-1.72385	0.15339	-11.2383	2.64322e-29	6.10914e-28
FLJ26850	6.07372	-1.72148	0.700267	-2.45832	0.0139588	0.0305843
FAT3	3.1372	-1.72118	0.7296	-2.35908	0.0183204	0.0388645
LOC100630918	55.9665	-1.72055	0.29342	-5.8638	4.52381e-09	2.67738e-08
LRRC37B	204.038	-1.71976	0.212316	-8.09999	5.49636e-16	5.95287e-15
RP11-439L8.3	53.3946	-1.71785	0.446194	-3.85	0.000118116	0.000393618
ASAP2	145.592	-1.71757	0.237419	-7.23434	4.67804e-13	4.07256e-12
FAM45B	65.0904	-1.71755	0.257158	-6.67897	2.40625e-11	1.8007e-10
HILPDA	499.478	-1.71285	0.47249	-3.62516	0.000288779	0.000899243
LOC102724060	2.45716	-1.71183	0.745222	-2.29708	0.0216143	0.0449547
BMF	337.643	-1.71051	0.256569	-6.66686	2.61341e-11	1.95333e-10
NFATC4	326.179	-1.70963	0.304773	-5.60952	2.02892e-08	1.11826e-07
AMT	125.274	-1.70932	0.33761	-5.06302	4.12662e-07	1.95448e-06
CYP26A1	39.8221	-1.7079	0.375635	-4.54669	5.44957e-06	2.22436e-05
LINC00494	30.7042	-1.70697	0.410173	-4.16158	3.16056e-05	0.00011554
DHRS4L1	10.8618	-1.70588	0.521768	-3.26941	0.00107771	0.00302374
LOC100505771	60.6902	-1.70359	0.323981	-5.2583	1.4539e-07	7.32236e-07
C9	24.0085	-1.70265	0.414859	-4.10417	4.05777e-05	0.000145831
HES1	76.3513	-1.70265	0.246891	-6.89635	5.33571e-12	4.24488e-11
EME1	787.771	-1.70161	0.199417	-8.53294	1.42669e-17	1.74001e-16
TTC28-AS1	231.945	-1.70063	0.168693	-10.0812	6.69078e-24	1.19221e-22
FOXN3	2279.43	-1.70006	0.188403	-9.02356	1.8207e-19	2.53319e-18
NHLRC4	5.93347	-1.70002	0.644342	-2.63839	0.00833007	0.019214
CFHR3	6.59489	-1.69898	0.617783	-2.75013	0.00595721	0.0142347
LOC102724757	8.26896	-1.69895	0.599901	-2.83205	0.00462512	0.0113286
OR10R2	4.45528	-1.69886	0.681462	-2.49296	0.0126682	0.0280217
CXCR4	3542.19	-1.69804	0.145102	-11.7024	1.23902e-31	3.15925e-30
LOC102723683	4.80436	-1.69661	0.69893	-2.42744	0.015206	0.0329457
SCGB1B2P	4.59249	-1.69533	0.692622	-2.4477	0.0143773	0.0313658
NEURL1B	374.092	-1.69419	0.191081	-8.86635	7.55802e-19	1.00711e-17
BTN3A2	883.83	-1.69393	0.160122	-10.579	3.73058e-26	7.43756e-25
ERG	6.59266	-1.69155	0.619209	-2.73179	0.00629913	0.0149462
ID3	2036.29	-1.69124	0.100618	-16.8085	2.11525e-63	1.36647e-61
VSX1	2.31568	-1.69057	0.744498	-2.27075	0.0231624	0.0477454
RNF165	50.2766	-1.69031	0.449735	-3.75846	0.000170965	0.000555067
RP11-21L23.3	1.6439	-1.68943	0.737353	-2.29121	0.0219512	0.0455622
PROX2	14.3341	-1.6894	0.472364	-3.57648	0.000348257	0.0010679
LINC00426	89.2084	-1.68773	0.234316	-7.20281	5.89822e-13	5.09359e-12
PLXNB2	111.512	-1.68738	0.385068	-4.38202	1.17583e-05	4.59424e-05
DTX1	436.014	-1.68673	0.205152	-8.22183	2.00422e-16	2.24517e-15
TRNT	111.29	-1.68576	0.360549	-4.67554	2.93177e-06	1.23956e-05
PVRIG	514.882	-1.68396	0.187617	-8.97555	2.81947e-19	3.87852e-18
LOC101928692	3.13807	-1.6827	0.731713	-2.29967	0.0214669	0.0446837
MNX1-AS1	40.4704	-1.68062	0.361742	-4.64591	3.38576e-06	1.41871e-05
CDC42BPG	111.923	-1.67989	0.233449	-7.19597	6.20199e-13	5.34582e-12
LOC101929007	5.41368	-1.67664	0.683113	-2.45442	0.0141113	0.030863
MIR6777	1.64692	-1.67635	0.736648	-2.27565	0.0228669	0.0472323
LOC100507033	5.08691	-1.67492	0.664158	-2.52187	0.0116734	0.0260545
FAM109B	1.63899	-1.67467	0.736597	-2.27353	0.0229945	0.0474368
ZNF664-FAM101A	1.63724	-1.6743	0.736586	-2.27306	0.0230227	0.0474897
C16orf86	34.162	-1.67228	0.418672	-3.99425	6.48985e-05	0.000226513
ST8SIA6	42.7117	-1.66886	0.324099	-5.14923	2.61562e-07	1.27347e-06
CECR1	421.352	-1.66684	0.134253	-12.4157	2.14919e-35	6.33735e-34
E2F2	2917.97	-1.66653	0.131431	-12.6799	7.64277e-37	2.36822e-35
NCKIPSD	836.969	-1.66607	0.212394	-7.84421	4.35677e-15	4.47727e-14
SH2D1A	2721.73	-1.66598	0.104077	-16.0073	1.13662e-57	6.37414e-56
LOC101060181	28.0795	-1.66545	0.466814	-3.5677	0.000360122	0.00110133
LOC101926937	10.1788	-1.66081	0.569362	-2.91697	0.00353444	0.00886739
RAB38	14.2144	-1.65974	0.47562	-3.48963	0.000483687	0.00144655
METTL7A	5.12885	-1.6591	0.66776	-2.48458	0.0129704	0.0286244
LOC101927633	5.77652	-1.65871	0.641114	-2.58723	0.0096752	0.0220386
ZNF775	227.823	-1.6585	0.196249	-8.45099	2.88845e-17	3.4469e-16
SCD	15228.9	-1.65805	0.178419	-9.29303	1.49952e-20	2.23243e-19
MUC16	5.75481	-1.658	0.7001	-2.36823	0.0178733	0.0380307
DFFB	313.081	-1.65667	0.142138	-11.6554	2.1541e-31	5.43941e-30
MAP1A	1383.31	-1.65579	0.137926	-12.005	3.34652e-33	9.06388e-32
C9orf72	378.595	-1.6504	0.192479	-8.57444	9.95662e-18	1.22865e-16
ORAI2	745.289	-1.64953	0.172248	-9.57647	1.00423e-21	1.61047e-20
PACSIN3	359.104	-1.64848	0.147925	-11.144	7.65601e-29	1.73227e-27
HSPE1-MOB4	5.78041	-1.64823	0.649036	-2.53951	0.0111008	0.0249103
RNF213	3062.85	-1.64728	0.204874	-8.04047	8.94973e-16	9.56836e-15
LOC101928349	5.78144	-1.64347	0.647094	-2.53977	0.0110924	0.0248947
URAHP	11.1937	-1.64206	0.517059	-3.17577	0.00149442	0.00406985
CDH4-2	27.2917	-1.64031	0.398493	-4.11629	3.85015e-05	0.000138806
C1orf213	74.0323	-1.64019	0.4447	-3.68829	0.000225763	0.000717185
ZNF514	217.955	-1.63864	0.18291	-8.95876	3.28356e-19	4.5e-18
CTDSPL	605.064	-1.63549	0.121344	-13.4782	2.10278e-41	7.36458e-40
GPA33	132.711	-1.6352	0.231386	-7.06698	1.58338e-12	1.31879e-11
TUB	978.51	-1.63341	0.142258	-11.482	1.62426e-30	3.95402e-29
ZFYVE21	478.951	-1.63138	0.119711	-13.6277	2.74087e-42	9.88333e-41
PCSK4	492.126	-1.63098	0.269169	-6.05932	1.36698e-09	8.54984e-09
ASIC1	681.64	-1.6305	0.131266	-12.4214	2.00115e-35	5.9199e-34
KLHL24	448.087	-1.6288	0.515735	-3.15821	0.00158742	0.00429561
LOC100130285	5.60092	-1.62874	0.64159	-2.5386	0.0111295	0.0249626
SLC30A8	7.74558	-1.62866	0.591563	-2.75315	0.00590243	0.0141112
ARPP21	1600.29	-1.62705	0.185327	-8.77938	1.64374e-18	2.13733e-17
USP28	420.301	-1.62575	0.193812	-8.38826	4.9339e-17	5.81196e-16
SLC25A45	195.303	-1.62504	0.184097	-8.82706	1.07463e-18	1.41443e-17
ADAM22	244.558	-1.62313	0.164085	-9.89203	4.50789e-23	7.7456e-22
LRFN1	264.184	-1.61668	0.140159	-11.5346	8.8266e-31	2.17184e-29
TOX	1953.97	-1.61247	0.120191	-13.4159	4.88245e-41	1.69376e-39
FAM45A	302.553	-1.61193	0.155522	-10.3646	3.59103e-25	6.8889e-24
ABCA7	833.025	-1.61189	0.16823	-9.58146	9.56791e-22	1.53574e-20
BAI2	525.751	-1.61133	0.262101	-6.14776	7.85873e-10	5.04294e-09
LOC100506734	82.5412	-1.60973	0.270099	-5.95976	2.52605e-09	1.54143e-08
PRR12	931.316	-1.60877	0.121878	-13.1998	8.79293e-40	2.96045e-38
CDCA7L	2850.43	-1.60629	0.125702	-12.7785	2.16161e-37	6.84897e-36
FRMPD3	11.8141	-1.60435	0.535992	-2.99323	0.0027604	0.00711585
TFAP2A-AS1	127.367	-1.60389	0.269492	-5.95153	2.65644e-09	1.61453e-08
LOC100131289	76.0958	-1.60378	0.338379	-4.7396	2.14138e-06	9.21147e-06
PPP1R3B	981.563	-1.60301	0.22903	-6.99912	2.57575e-12	2.09661e-11
BLNK	14.6732	-1.60214	0.556177	-2.88063	0.00396882	0.00985173
CDT1	4433.84	-1.59951	0.208838	-7.65911	1.87219e-14	1.81674e-13
RGMB-AS1	11.678	-1.59847	0.521289	-3.06638	0.00216667	0.00570435
LINC01126	9.76771	-1.59762	0.555664	-2.87515	0.00403834	0.0100093
PBXIP1	721.417	-1.5976	0.192539	-8.29758	1.06253e-16	1.21787e-15
LAMB2P1	16.2839	-1.59698	0.449321	-3.5542	0.000379131	0.00115598
OR2W3	4.12001	-1.59679	0.688666	-2.31867	0.020413	0.0427725
GTF2IRD1	233.562	-1.59473	0.178618	-8.92814	4.3322e-19	5.89296e-18
SOX11	318.536	-1.59367	0.141291	-11.2794	1.6592e-29	3.87896e-28
PRKCQ	861.838	-1.59235	0.114785	-13.8725	9.29672e-44	3.48284e-42
MDFI	554.63	-1.5915	0.147189	-10.8126	2.99948e-27	6.28139e-26
GAREM	22.394	-1.59124	0.405867	-3.92058	8.83347e-05	0.000301181
LOC646214	4.78114	-1.59	0.663305	-2.39709	0.0165259	0.0354275
DNTT	525.938	-1.58971	0.27814	-5.71551	1.09378e-08	6.19856e-08
LRRC34	173.256	-1.58899	0.180127	-8.8215	1.12937e-18	1.48114e-17
ENHO	78.5919	-1.58818	0.255686	-6.21146	5.24961e-10	3.4264e-09
KDM3A	2377.23	-1.58817	0.260628	-6.09363	1.10378e-09	6.98006e-09
SULT1A1	234.524	-1.58671	0.183623	-8.64114	5.56542e-18	6.94045e-17
BUB1	4409.7	-1.58642	0.10815	-14.6688	1.02192e-48	4.48028e-47
NRTN	42.2176	-1.58543	0.329393	-4.8132	1.48536e-06	6.55451e-06
ADRBK1	5037.98	-1.58366	0.103763	-15.2624	1.36158e-52	6.65575e-51
LOC100505534	4.78542	-1.5827	0.665967	-2.37654	0.0174758	0.0372759
SAMD12	28.5543	-1.58269	0.371261	-4.263	2.01699e-05	7.5952e-05
IGF1R	879.584	-1.58264	0.144331	-10.9653	5.61143e-28	1.21839e-26
RP11-307C12.11	28.049	-1.58161	0.391243	-4.04254	5.28748e-05	0.000186974
CERCAM	888.889	-1.58145	0.269907	-5.85925	4.64975e-09	2.74569e-08
PCAT6	16.828	-1.5802	0.499914	-3.16094	0.00157262	0.00425935
KANK1	74.9151	-1.57932	0.256577	-6.15533	7.49219e-10	4.81618e-09
HOXA7	100.244	-1.57886	0.216463	-7.29389	3.01121e-13	2.66204e-12
INPP4B	30.8046	-1.57796	0.416797	-3.78593	0.000153133	0.000501538
MED12L	817.144	-1.57783	0.142743	-11.0536	2.1063e-28	4.66191e-27
C12orf65	708.883	-1.5768	0.188701	-8.3561	6.48241e-17	7.57262e-16
LOC100130987	48.1013	-1.57546	0.329353	-4.78349	1.72274e-06	7.52213e-06
ALS2CL	105.629	-1.57227	0.252482	-6.22725	4.74689e-10	3.11049e-09
CTD-2201I18.1	6.73532	-1.56952	0.612714	-2.56159	0.0104194	0.0235228
SOX12	773.797	-1.56901	0.108716	-14.4321	3.2481e-47	1.3651e-45
TBC1D19	327.703	-1.56802	0.152888	-10.256	1.11226e-24	2.06861e-23
SMAD1	255.37	-1.5669	0.171745	-9.12341	7.27943e-20	1.03728e-18
SLC37A4	21.3829	-1.56435	0.420642	-3.71897	0.00020004	0.000642165
MID1IP1	2239.09	-1.56363	0.132907	-11.7649	5.92227e-32	1.52709e-30
PM20D2	1660.21	-1.56299	0.121975	-12.814	1.36976e-37	4.37797e-36
RGS9BP	9.36624	-1.56276	0.556228	-2.80958	0.00496064	0.0120439
RIMS3	1280.68	-1.56037	0.123381	-12.6468	1.1656e-36	3.56346e-35
B4GALNT4	321.805	-1.56009	0.21102	-7.3931	1.43447e-13	1.29763e-12
NUDT6	52.9446	-1.55943	0.300193	-5.19474	2.05004e-07	1.00912e-06
PIK3R6	186.481	-1.55893	0.217005	-7.18386	6.77714e-13	5.82509e-12
AFF3	524.553	-1.55874	0.16488	-9.45377	3.26852e-21	5.04689e-20
ADD3	2638.84	-1.55872	0.147965	-10.5343	6.00016e-26	1.18079e-24
LOC100996404	18.1007	-1.55728	0.458843	-3.39392	0.000689006	0.00199848
IQGAP2	2096.35	-1.55633	0.10025	-15.5244	2.37191e-54	1.23542e-52
LPHN3	40.5498	-1.55586	0.341783	-4.5522	5.30878e-06	2.17174e-05
SCAI	1158.28	-1.55394	0.22727	-6.83741	8.06391e-12	6.31639e-11
CSTF3-AS1	23.8687	-1.55377	0.390793	-3.97594	7.01021e-05	0.000243051
ING4	375.839	-1.55375	0.197244	-7.87734	3.34437e-15	3.45629e-14
LINC00461	11.3868	-1.55293	0.521025	-2.98053	0.00287747	0.00738681
AP2A2	151.889	-1.55197	0.224916	-6.90023	5.19176e-12	4.13396e-11
GALNT14	16.6637	-1.54842	0.460342	-3.36363	0.000769235	0.00221268
DPYSL2	1254.09	-1.5484	0.170473	-9.08299	1.05637e-19	1.49016e-18
RNF17	7.893	-1.54726	0.573225	-2.69923	0.00695012	0.0163067
KIF9-AS1	30.2824	-1.5468	0.351092	-4.40567	1.05459e-05	4.14444e-05
2022-09-03	642.838	-1.54609	0.143262	-10.792	3.75405e-27	7.82571e-26
FAM83F	145.141	-1.54547	0.187204	-8.25554	1.51214e-16	1.71388e-15
PARP10	729.77	-1.54247	0.132359	-11.6537	2.1966e-31	5.53908e-30
ICAM4	155.197	-1.53926	0.171864	-8.95627	3.3585e-19	4.59582e-18
DRAXIN	36.8153	-1.5373	0.313209	-4.90821	9.19126e-07	4.1603e-06
LOC101929479	9.38233	-1.53702	0.570746	-2.693	0.00708133	0.0165975
ZNF821	47.8536	-1.53664	0.321766	-4.77564	1.79137e-06	7.80128e-06
FAM19A2	19.6677	-1.53532	0.483903	-3.17279	0.00150983	0.00410877
AC074286.1	26.4992	-1.53526	0.393783	-3.89874	9.66948e-05	0.000327463
PRRT4	441.624	-1.53497	0.142921	-10.74	6.60463e-27	1.35975e-25
SIT1	1837.15	-1.53453	0.0989296	-15.5114	2.9069e-54	1.5055e-52
MCM3AP-AS1	92.4033	-1.53244	0.225763	-6.78784	1.13825e-11	8.8101e-11
UNC13B	1016.17	-1.53217	0.131045	-11.6919	1.40159e-31	3.55394e-30
LYN	9.52628	-1.53133	0.587127	-2.60817	0.00910273	0.0208594
ASTN2	110.304	-1.53051	0.207415	-7.37897	1.59524e-13	1.43737e-12
TSPAN2	355.115	-1.52937	0.151278	-10.1096	5.00643e-24	8.99975e-23
B3GNT1	373.556	-1.52904	0.148348	-10.3071	6.54435e-25	1.23217e-23
SALL2	538.368	-1.52789	0.130646	-11.6948	1.35436e-31	3.44372e-30
ABLIM1	4111.68	-1.52685	0.229672	-6.64795	2.97212e-11	2.20969e-10
PRKCZ	32.8084	-1.52624	0.358447	-4.25794	2.06323e-05	7.75813e-05
C14orf93	144.686	-1.52598	0.191125	-7.98419	1.41448e-15	1.49305e-14
LRRC27	115.419	-1.52504	0.267341	-5.70449	1.1669e-08	6.58576e-08
FANCE	199.15	-1.52427	0.175662	-8.67734	4.05141e-18	5.11519e-17
ONECUT2	358.321	-1.52363	0.221335	-6.88383	5.82662e-12	4.61735e-11
CLK3	1227.83	-1.52132	0.256995	-5.91965	3.22621e-09	1.93891e-08
DLEU1	203.424	-1.52071	0.190373	-7.98802	1.37121e-15	1.4482e-14
LOC440461	14.3167	-1.52063	0.474405	-3.20534	0.00134904	0.00370817
GUCY1B2	23.6537	-1.52002	0.389233	-3.90516	9.41643e-05	0.000319272
LOC102724645	7.58452	-1.51958	0.635009	-2.39301	0.0167109	0.0357947
TJP2	545.47	-1.51911	0.142271	-10.6775	1.29684e-26	2.64018e-25
TRIM7	702.875	-1.51853	0.292298	-5.19514	2.04564e-07	1.00723e-06
MMP15	200.509	-1.5178	0.194457	-7.80536	5.93313e-15	6.01605e-14
PHACTR3	7.37527	-1.51683	0.628238	-2.41443	0.01576	0.0339648
SPATA3-AS1	6.28066	-1.51651	0.659308	-2.30015	0.0214398	0.0446376
H1FX-AS1	9.23631	-1.51431	0.560542	-2.70152	0.0069024	0.0162135
ASB12	14.3587	-1.51114	0.474818	-3.18256	0.00145978	0.0039868
NRN1	5645.49	-1.5104	0.491136	-3.07532	0.00210274	0.00554722
RP5-1057J7.6	33.5961	-1.50891	0.426511	-3.5378	0.000403483	0.00122472
NAV1	226.909	-1.50808	0.218957	-6.88756	5.67556e-12	4.49959e-11
VLDLR	726.804	-1.50688	0.204943	-7.35267	1.9428e-13	1.7428e-12
TP53INP1	200.269	-1.5062	0.263549	-5.71506	1.09668e-08	6.2111e-08
EVPL	579.485	-1.50596	0.181996	-8.2747	1.28779e-16	1.46505e-15
LINC00539	60.3042	-1.50564	0.382752	-3.93372	8.36405e-05	0.000286244
UROC1	7.88317	-1.50524	0.59841	-2.51539	0.01189	0.0264862
CHEK2	610.898	-1.50512	0.111133	-13.5435	8.66004e-42	3.06827e-40
ANKRD62P1-PARP4P3	12.4864	-1.50333	0.536341	-2.80294	0.00506396	0.0122703
KLRG1	20.1423	-1.50305	0.42096	-3.57053	0.000356255	0.00109026
GLUL	10177.6	-1.50258	0.155857	-9.64072	5.3809e-22	8.77552e-21
GLB1L3	1759.18	-1.5025	0.18143	-8.28145	1.21682e-16	1.38776e-15
SKOR1	17.6285	-1.50173	0.458722	-3.27372	0.00106142	0.00298125
LOC100996273	9.86109	-1.49986	0.566392	-2.6481	0.00809456	0.0187204
POC1A	872.309	-1.49912	0.0978644	-15.3184	5.76616e-53	2.85683e-51
TBX6	61.343	-1.49905	0.372843	-4.0206	5.80493e-05	0.00020401
MYOM2-2	7.24388	-1.49803	0.612682	-2.44503	0.0144839	0.0315571
LRP2	231.957	-1.49684	0.174573	-8.5743	9.96954e-18	1.22902e-16
C14orf159	448.841	-1.49644	0.134404	-11.1338	8.58562e-29	1.93459e-27
PLCL1	38.3967	-1.49487	0.354381	-4.21826	2.46191e-05	9.14068e-05
FGF14-AS2	120.631	-1.49428	0.190513	-7.84349	4.38195e-15	4.50061e-14
EID2B	82.2977	-1.49419	0.23313	-6.40926	1.46228e-10	1.01378e-09
RP5-1021I20.1	7.07275	-1.49375	0.599607	-2.49122	0.0127304	0.0281378
C20orf112	306.767	-1.49315	0.226174	-6.60176	4.06309e-11	2.96533e-10
C1orf74	105.004	-1.49284	0.229594	-6.5021	7.92082e-11	5.61055e-10
LSAMP	377.469	-1.4919	0.155794	-9.5761	1.00778e-21	1.61474e-20
NXN	169.703	-1.49152	0.20405	-7.30957	2.6799e-13	2.37489e-12
GRK6	2505.57	-1.49055	0.110798	-13.4528	2.96426e-41	1.03619e-39
SLIT1	1842.39	-1.48957	0.0992281	-15.0116	6.16691e-51	2.86879e-49
LOC100506127	52.0983	-1.4895	0.292741	-5.08813	3.6162e-07	1.72525e-06
LOC257358	100.24	-1.48846	0.222334	-6.6947	2.16118e-11	1.62998e-10
SPATS2	643.142	-1.48762	0.139856	-10.6368	2.00927e-26	4.05e-25
TRERF1	367.343	-1.48652	0.131557	-11.2994	1.32074e-29	3.11961e-28
TTLL11	248.675	-1.48484	0.196339	-7.56261	3.95046e-14	3.74015e-13
ZRANB3	214.152	-1.48294	0.198105	-7.48565	7.11913e-14	6.57998e-13
FRMPD1	14.6808	-1.48119	0.467939	-3.16534	0.001549	0.00420035
BCAR3	25.5188	-1.4811	0.382426	-3.87292	0.000107541	0.000360613
CMTM1	96.3506	-1.48012	0.218587	-6.77132	1.27609e-11	9.81465e-11
PIANP	210.568	-1.47955	0.210946	-7.01389	2.31784e-12	1.89766e-11
HRK	9.57343	-1.47946	0.608603	-2.43091	0.0150608	0.0326694
HOXC11	75.7066	-1.47761	0.349418	-4.22878	2.34966e-05	8.75414e-05
LOC80154	22.9333	-1.47696	0.450344	-3.27963	0.00103944	0.00292309
NPB	56.6813	-1.47677	0.28715	-5.14285	2.70596e-07	1.31535e-06
FLJ22184	1121.75	-1.47414	0.13729	-10.7374	6.78993e-27	1.39633e-25
FBXL22	9.77793	-1.47394	0.562956	-2.61821	0.00883911	0.0203011
PLEKHH3	170.432	-1.4735	0.318499	-4.62638	3.72114e-06	1.55284e-05
SYNE3	307.6	-1.47326	0.235404	-6.25845	3.88823e-10	2.5718e-09
CYP2S1	117.632	-1.47092	0.196321	-7.49244	6.76044e-14	6.26429e-13
RASAL1	100.532	-1.46763	0.22268	-6.59077	4.37562e-11	3.18198e-10
AC007246.3	28.2941	-1.46648	0.408661	-3.5885	0.000332581	0.00102585
LIG4	2283.19	-1.46488	0.163473	-8.96102	3.2169e-19	4.41527e-18
RNF144B	219.745	-1.4648	0.162426	-9.01822	1.91162e-19	2.65363e-18
RHOBTB1	31.0282	-1.46387	0.342453	-4.27466	1.91431e-05	7.23236e-05
HMHA1	4032.78	-1.46251	0.0992708	-14.7325	3.98672e-49	1.76906e-47
MVB12B	613.823	-1.46245	0.108272	-13.5072	1.41898e-41	5.00808e-40
LOC101927098	10.6741	-1.46159	0.595112	-2.45599	0.0140499	0.0307543
ATP2A3	9744.12	-1.46062	0.126891	-11.5109	1.163e-30	2.84633e-29
TXLNG2P	1135.7	-1.46013	0.163439	-8.9338	4.11633e-19	5.62021e-18
RTN4RL1	187.89	-1.45939	0.199128	-7.32892	2.32022e-13	2.06717e-12
LMTK3	142.446	-1.45729	0.246337	-5.91582	3.30223e-09	1.98264e-08
DNAJB13	29.6996	-1.45449	0.366538	-3.96819	7.24209e-05	0.000250556
TTC9C	443.788	-1.45393	0.170291	-8.53792	1.36658e-17	1.67116e-16
VWDE	208.225	-1.45334	0.224484	-6.47411	9.537e-11	6.7189e-10
BCO2	7.75551	-1.45224	0.606704	-2.39365	0.0166818	0.0357451
MNX1	183.661	-1.45163	0.209934	-6.91472	4.68776e-12	3.74406e-11
JAKMIP1	902.78	-1.45138	0.102183	-14.2037	8.68654e-46	3.47499e-44
RIMKLA	541.586	-1.45127	0.183387	-7.91368	2.49885e-15	2.60456e-14
RP11-973H7.4	101.216	-1.45119	0.218262	-6.64885	2.95383e-11	2.19878e-10
MYOM2	20.753	-1.45116	0.411789	-3.52404	0.000425023	0.00128477
DEF6	1648.69	-1.45095	0.119889	-12.1024	1.02551e-33	2.84499e-32
PIEZO1	3637.45	-1.44872	0.118526	-12.2228	2.34861e-34	6.65694e-33
INSIG2	494.913	-1.44715	0.248625	-5.82059	5.86398e-09	3.43386e-08
HYPK	11.6981	-1.44691	0.556107	-2.60185	0.00927225	0.0212133
DDB2	1057.26	-1.4461	0.189476	-7.63211	2.30943e-14	2.22685e-13
RAB11FIP5	789.621	-1.44584	0.199814	-7.23594	4.62306e-13	4.02854e-12
ORC1	843.18	-1.4446	0.129419	-11.1622	6.24318e-29	1.42139e-27
KCNN2	57.1751	-1.44403	0.265642	-5.43598	5.44949e-08	2.86286e-07
LOC101928548	35.8567	-1.44287	0.407905	-3.53727	0.00040429	0.00122676
SLC2A4RG	845.38	-1.44194	0.197628	-7.29621	2.95997e-13	2.61927e-12
ABCG4	51.8301	-1.44129	0.270525	-5.32776	9.94334e-08	5.08772e-07
MYO1G	3740.47	-1.44025	0.106248	-13.5555	7.34927e-42	2.614e-40
TBC1D8	477.13	-1.43871	0.12519	-11.4922	1.44451e-30	3.52583e-29
PDK1	2353.44	-1.43696	0.257951	-5.57067	2.53758e-08	1.3803e-07
LOC100996574	7.07907	-1.43654	0.628816	-2.28451	0.0223417	0.0462728
IMPA2	633.524	-1.4348	0.120426	-11.9144	9.95596e-33	2.6379e-31
NARFL	1127.35	-1.43473	0.127453	-11.2569	2.14126e-29	4.96782e-28
RNF168	3019.7	-1.43364	0.132246	-10.8407	2.20748e-27	4.66017e-26
RNF166	1008.27	-1.43337	0.131177	-10.927	8.56602e-28	1.84674e-26
RP5-886K2.3	21.0732	-1.43289	0.401813	-3.56606	0.000362395	0.00110773
ATP8A2	671.9	-1.43094	0.178714	-8.00687	1.17661e-15	1.25136e-14
ZNF367	872.153	-1.42756	0.144309	-9.89238	4.49233e-23	7.72612e-22
STMN3	1018.71	-1.42666	0.136766	-10.4315	1.78148e-25	3.46479e-24
LOC102724450	9.25587	-1.42665	0.537661	-2.65344	0.00796758	0.0184571
GCK	16.1693	-1.42415	0.452398	-3.148	0.00164391	0.00443077
TUBB4A	1204.7	-1.42339	0.0908462	-15.6681	2.49955e-55	1.30936e-53
PTPRU	1076.37	-1.42243	0.185024	-7.68781	1.49672e-14	1.46444e-13
ADC	53.2554	-1.42188	0.284531	-4.99726	5.81509e-07	2.70169e-06
KLLN	141.745	-1.4196	0.187371	-7.5764	3.55267e-14	3.37402e-13
LOC100506036	6.76372	-1.41744	0.605917	-2.33933	0.0193186	0.0407267
TCHH	57.8979	-1.41577	0.31395	-4.50954	6.49683e-06	2.62777e-05
IL22RA1	89.2958	-1.41525	0.226986	-6.23495	4.51917e-10	2.97299e-09
PAAF1	520.522	-1.41494	0.134025	-10.5573	4.69898e-26	9.29727e-25
FBXO16	40.1125	-1.41397	0.316756	-4.46391	8.04779e-06	3.20404e-05
SH3D21	219.675	-1.41295	0.321448	-4.39557	1.10481e-05	4.32693e-05
ELOVL6	227.71	-1.41262	0.20177	-7.00114	2.53894e-12	2.06849e-11
TXNIP	2087.17	-1.41245	0.157587	-8.96301	3.15929e-19	4.33946e-18
GXYLT2	372.869	-1.41207	0.186476	-7.5724	3.66378e-14	3.47233e-13
SLFN5	804.816	-1.41205	0.107334	-13.1556	1.58034e-39	5.23401e-38
NOS3	221.418	-1.40963	0.194141	-7.26085	3.84663e-13	3.3761e-12
ADAMTS15	16.0965	-1.40949	0.523494	-2.69247	0.0070925	0.0166173
LOC102724827	13.529	-1.4083	0.480698	-2.9297	0.00339287	0.00855026
FAM129B	448.117	-1.40791	0.13029	-10.806	3.22384e-27	6.73579e-26
HNRNPU-AS1	409.015	-1.40698	0.280961	-5.00775	5.50687e-07	2.56828e-06
ZC4H2	501.104	-1.40678	0.149286	-9.42339	4.36748e-21	6.70978e-20
SH2D3C	301.136	-1.40583	0.293967	-4.78228	1.73319e-06	7.56235e-06
TOLLIP-AS1	10.7199	-1.40542	0.559169	-2.51341	0.0119571	0.0266164
PCMTD1	673.92	-1.40498	0.161222	-8.71453	2.91957e-18	3.72474e-17
LINC01088	13.5668	-1.40486	0.480971	-2.92088	0.00349044	0.00876783
LGALS9B	9.84278	-1.40391	0.558278	-2.51472	0.0119128	0.0265307
MAP7	129.649	-1.4033	0.209627	-6.69429	2.16715e-11	1.63313e-10
FAM65B	1061.97	-1.40322	0.215123	-6.52289	6.89639e-11	4.91923e-10
RBM43	193.535	-1.40291	0.226736	-6.18742	6.1157e-10	3.9662e-09
TMTC4	376.961	-1.40192	0.144256	-9.71824	2.52103e-22	4.15594e-21
SLC35E2	409.313	-1.40081	0.15563	-9.0009	2.23876e-19	3.09365e-18
ARHGEF6	3580.35	-1.40054	0.127027	-11.0255	2.8776e-28	6.31551e-27
SLC16A3	2463.77	-1.39977	0.239719	-5.83921	5.24477e-09	3.08609e-08
PYHIN1	228.499	-1.39929	0.15666	-8.93207	4.18123e-19	5.70457e-18
SENCR	17.6679	-1.39796	0.427082	-3.27327	0.0010631	0.00298505
ALOXE3	12.1843	-1.3971	0.507435	-2.75326	0.00590043	0.0141083
LGR6	17.8124	-1.39663	0.445026	-3.1383	0.0016993	0.00456594
PITPNM3	15.6878	-1.39588	0.557603	-2.50336	0.0123021	0.0273144
NTHL1	402.255	-1.3943	0.170801	-8.16328	3.26041e-16	3.59727e-15
LOC102724856	21.682	-1.39384	0.433057	-3.21861	0.00128812	0.00356161
FHL1	659.223	-1.39372	0.128373	-10.8568	1.85182e-27	3.9184e-26
RAP1GDS1	3159.66	-1.3918	0.112873	-12.3307	6.19093e-35	1.7994e-33
SPC24	387.235	-1.39152	0.195532	-7.11657	1.10645e-12	9.37352e-12
TMEM52	81.4693	-1.39103	0.319268	-4.35695	1.31888e-05	5.11927e-05
SNAPC3	1051.85	-1.39016	0.211026	-6.5876	4.47006e-11	3.2455e-10
TSPAN14	964.443	-1.38972	0.116484	-11.9306	8.20174e-33	2.18897e-31
NEFM	13.5663	-1.38966	0.490833	-2.83122	0.00463708	0.0113562
TTC7A	859.005	-1.38919	0.13178	-10.5417	5.54655e-26	1.09387e-24
CREBZF	1893.1	-1.38759	0.185889	-7.4646	8.35517e-14	7.68357e-13
PRDM5	16.5474	-1.38702	0.45428	-3.05323	0.00226389	0.00593212
SPIN4	529.25	-1.38692	0.137159	-10.1117	4.90104e-24	8.81898e-23
SUGP2	3178.88	-1.38626	0.190159	-7.29	3.09961e-13	2.73622e-12
LOC102723407	51.9275	-1.38527	0.356951	-3.88086	0.00010409	0.000349939
RP4-639F20.1	13.5736	-1.38482	0.499014	-2.77511	0.00551825	0.0132725
TLN2	294.311	-1.38436	0.174904	-7.91496	2.47331e-15	2.57941e-14
LOC100506634	114.146	-1.38327	0.234492	-5.89902	3.65656e-09	2.18462e-08
TRAM2-AS1	70.9712	-1.38286	0.274717	-5.03377	4.80929e-07	2.2585e-06
ZNF792	101.34	-1.3827	0.217536	-6.3562	2.06805e-10	1.4076e-09
RNF208	421.017	-1.38262	0.191896	-7.20501	5.8039e-13	5.01451e-12
ZNF254	152.271	-1.38213	0.221308	-6.24529	4.23022e-10	2.78993e-09
PLCB2	423.213	-1.38189	0.147785	-9.35068	8.70836e-21	1.31142e-19
PPP1R3E	317.702	-1.38075	0.297422	-4.6424	3.44379e-06	1.44138e-05
CCND3	6601.91	-1.3801	0.117496	-11.7459	7.41091e-32	1.90557e-30
CHRNA3	907.42	-1.37977	0.125463	-10.9974	3.93443e-28	8.58344e-27
SEC31B	852.638	-1.37839	0.215309	-6.40191	1.53449e-10	1.06062e-09
AOX1	78.0849	-1.37759	0.356953	-3.85932	0.000113704	0.000379746
CXorf65	102.384	-1.37709	0.341316	-4.03464	5.4685e-05	0.00019289
PDE3B	1980.99	-1.37603	0.0978727	-14.0594	6.74955e-45	2.61431e-43
LOC101928632	52.7822	-1.37597	0.392207	-3.50828	0.000451022	0.0013564
CAMSAP3	424.316	-1.37482	0.147999	-9.28942	1.55128e-20	2.3076e-19
P2RX7	10.3849	-1.37457	0.556567	-2.46974	0.0135212	0.0297073
TTK	2089.75	-1.3745	0.138353	-9.93474	2.93934e-23	5.11294e-22
BTBD2	1988.87	-1.37444	0.113695	-12.0888	1.21048e-33	3.35304e-32
HEBP1	360.852	-1.37387	0.15567	-8.82553	1.08944e-18	1.43186e-17
DCAF8	1841.46	-1.37385	0.153161	-8.97	2.96504e-19	4.07571e-18
ACOT11	50.219	-1.37379	0.369271	-3.72029	0.000198996	0.000639262
C16orf54	204.714	-1.37305	0.197343	-6.9577	3.45867e-12	2.78921e-11
SUV420H2	452.178	-1.373	0.220023	-6.24027	4.36812e-10	2.87673e-09
LRIG1	409.42	-1.37291	0.165536	-8.29374	1.09741e-16	1.25471e-15
HPS4	1481.26	-1.37268	0.127099	-10.8001	3.43984e-27	7.17889e-26
FAM101B	2755.83	-1.37255	0.0860532	-15.95	2.85031e-57	1.5887e-55
LRRC28	1249.06	-1.37253	0.100046	-13.7191	7.80661e-43	2.83176e-41
ZNF785	15.3468	-1.37116	0.487949	-2.81006	0.00495324	0.0120291
ZNF33B	261.145	-1.36997	0.161771	-8.4686	2.4837e-17	2.97946e-16
ZHX3	742.949	-1.36973	0.116784	-11.7287	9.08325e-32	2.32577e-30
TRNL2	24.5821	-1.36953	0.365565	-3.74634	0.000179431	0.000580491
TBC1D16	673.164	-1.36952	0.112491	-12.1746	4.24705e-34	1.18904e-32
PELI2	1486.02	-1.36931	0.135582	-10.0996	5.54914e-24	9.93628e-23
LINC01089	360.515	-1.36919	0.212211	-6.452	1.10383e-10	7.7378e-10
SMO	560.205	-1.36869	0.121347	-11.2792	1.6624e-29	3.88149e-28
CARHSP1	2489.15	-1.36845	0.115968	-11.8002	3.89322e-32	1.0139e-30
PPM1E	113.775	-1.36773	0.191597	-7.13859	9.42898e-13	8.02517e-12
PIFO	7.77107	-1.36772	0.570364	-2.39798	0.0164857	0.0353622
PPP1R32	64.0452	-1.36578	0.389927	-3.50266	0.000460642	0.00138238
NBAS	1722.63	-1.36538	0.13781	-9.90771	3.85373e-23	6.65916e-22
ACVR2B	826.761	-1.36533	0.232865	-5.86316	4.54127e-09	2.68685e-08
F12	502.837	-1.36454	0.120852	-11.2909	1.45474e-29	3.42285e-28
CCDC112	214.634	-1.36368	0.172746	-7.89416	2.92285e-15	3.03266e-14
DOC2A	148.252	-1.36273	0.198552	-6.86332	6.72763e-12	5.31753e-11
VAT1	8885.38	-1.36198	0.0855314	-15.9238	4.33529e-57	2.3945e-55
MYOZ3	28.7396	-1.36172	0.348147	-3.91133	9.1791e-05	0.000311977
SRPK2	1335.52	-1.35948	0.117422	-11.5778	5.34041e-31	1.31937e-29
EVPLL	12.5681	-1.35901	0.486069	-2.79592	0.00517514	0.0125181
C3orf18	113.271	-1.35833	0.198076	-6.85763	7.00135e-12	5.52433e-11
PHF12	1032.14	-1.357	0.122213	-11.1036	1.20502e-28	2.68988e-27
RPEL1	7.77632	-1.35548	0.581795	-2.32983	0.0198151	0.0416678
NAA16	673.634	-1.35528	0.146373	-9.25907	2.06215e-20	3.0428e-19
IGIP	138.422	-1.35521	0.339371	-3.99331	6.51579e-05	0.000227245
ST6GALNAC1	9.58084	-1.35438	0.549091	-2.46658	0.0136411	0.0299455
SERGEF	400.731	-1.354	0.224798	-6.02317	1.71034e-09	1.06031e-08
FBXL20	331.199	-1.35163	0.211517	-6.39016	1.65717e-10	1.13952e-09
CBX2	1152.81	-1.35108	0.102533	-13.177	1.19005e-39	3.97743e-38
LRRC10B	99.3853	-1.35065	0.250734	-5.38677	7.17367e-08	3.72438e-07
LRIG3	264.897	-1.35	0.156408	-8.63127	6.0673e-18	7.5406e-17
TRPM2	432.201	-1.34944	0.21659	-6.23039	4.65276e-10	3.0499e-09
ZNF184	474.794	-1.34786	0.173566	-7.76572	8.11824e-15	8.13247e-14
COG4	907.069	-1.34742	0.0990053	-13.6096	3.51175e-42	1.26382e-40
EFCAB4B	871.07	-1.34716	0.230213	-5.85179	4.86303e-09	2.86701e-08
NEIL3	1153.65	-1.34704	0.159532	-8.44366	3.07563e-17	3.6655e-16
CLTCL1	150.183	-1.34642	0.18494	-7.28032	3.33032e-13	2.9328e-12
DNAH11	51.5411	-1.34518	0.302829	-4.44205	8.91043e-06	3.52675e-05
PLEKHG3	20.8198	-1.34466	0.408581	-3.29106	0.000998122	0.00281991
LOC728975	11.9053	-1.34316	0.508001	-2.644	0.00819317	0.0189245
AGAP3	867.327	-1.34273	0.12089	-11.1071	1.15881e-28	2.5899e-27
ALDH1A2	4861.35	-1.34105	0.160575	-8.35156	6.73696e-17	7.85492e-16
VANGL1	2778.68	-1.34051	0.181169	-7.39922	1.36985e-13	1.24472e-12
LOC101928965	21.5745	-1.3404	0.437701	-3.06237	0.00219591	0.00577219
NMT2	339.257	-1.33917	0.17932	-7.46805	8.13944e-14	7.48894e-13
PAX6	1030.3	-1.33905	0.162781	-8.22603	1.93516e-16	2.17447e-15
KLF2	95.8229	-1.33882	0.288277	-4.64423	3.41347e-06	1.42967e-05
ATP8B3	452.751	-1.33725	0.187334	-7.13831	9.44885e-13	8.03833e-12
NDRG2	318.303	-1.33697	0.164703	-8.11749	4.75925e-16	5.19455e-15
HOTAIR	14.8713	-1.33661	0.466963	-2.86235	0.00420507	0.0104043
TPO	319.286	-1.33569	0.161914	-8.24939	1.59201e-16	1.79884e-15
LGALS9	571.536	-1.33475	0.136102	-9.807	1.05049e-22	1.77005e-21
KCTD7	474.81	-1.33105	0.177422	-7.50215	6.2779e-14	5.84382e-13
HSD11B1L	89.5376	-1.33077	0.247278	-5.38167	7.37999e-08	3.81996e-07
NME9	15.2893	-1.3301	0.468135	-2.84127	0.0044934	0.0110415
ADAMTS6	32.3682	-1.32895	0.323833	-4.10383	4.06371e-05	0.000146016
FAM160A1	31.523	-1.32791	0.551579	-2.40746	0.0160637	0.0345259
ADRBK2	6155.62	-1.32737	0.135812	-9.77363	1.46122e-22	2.44187e-21
CNNM1	259.859	-1.32722	0.174564	-7.60305	2.89236e-14	2.76415e-13
CDK18	684.429	-1.32708	0.196092	-6.76766	1.3088e-11	1.00452e-10
HIRA	2661.99	-1.32523	0.100647	-13.1672	1.35619e-39	4.51618e-38
DQX1	67.7176	-1.32446	0.23922	-5.53656	3.0847e-08	1.66552e-07
RHOU	589.049	-1.32372	0.240477	-5.50457	3.70072e-08	1.98058e-07
GSC	515.77	-1.3237	0.300656	-4.4027	1.06913e-05	4.19797e-05
CCDC61	209.005	-1.32074	0.193493	-6.82577	8.74551e-12	6.83271e-11
GDPD3	159.176	-1.32038	0.313273	-4.21479	2.50009e-05	9.27402e-05
RP11-330A16.1	24.0899	-1.31996	0.388469	-3.39785	0.000679167	0.00197182
USP44	998.824	-1.31854	0.118274	-11.1482	7.30919e-29	1.66128e-27
UHRF2	2028.02	-1.31806	0.144167	-9.14254	6.10026e-20	8.74706e-19
METTL15	247.096	-1.31802	0.175848	-7.49523	6.61829e-14	6.13879e-13
UNC13D	1017.55	-1.31795	0.171798	-7.67152	1.69966e-14	1.65371e-13
NKX2-1	239.125	-1.31733	0.281735	-4.67577	2.92846e-06	1.23845e-05
ADA	14205.1	-1.31724	0.098529	-13.369	9.17548e-41	3.15906e-39
CEP128	262.626	-1.316	0.222226	-5.92188	3.18282e-09	1.91535e-08
SLC35E2B	806.546	-1.31575	0.121701	-10.8113	3.04252e-27	6.36422e-26
PTPRN2	199.573	-1.31568	0.220059	-5.97874	2.24864e-09	1.37767e-08
ZNF711	697.263	-1.3146	0.14981	-8.77511	1.70734e-18	2.21687e-17
GABRB3	285.398	-1.31429	0.174197	-7.54484	4.52844e-14	4.26308e-13
ENGASE	716.29	-1.31324	0.151443	-8.67153	4.26368e-18	5.36466e-17
C4orf27	1516.94	-1.31268	0.133351	-9.84384	7.28746e-23	1.23475e-21
RAG1	100.697	-1.31256	0.208686	-6.28965	3.18192e-10	2.12229e-09
APAF1	559.036	-1.31049	0.169993	-7.70909	1.26715e-14	1.25019e-13
ARL11	129.707	-1.31	0.190176	-6.88837	5.64344e-12	4.47801e-11
CLEC4A	15.7051	-1.30959	0.441836	-2.96397	0.00303693	0.00774138
COASY	1499.71	-1.30945	0.0903412	-14.4945	1.31228e-47	5.59231e-46
ZFP3	22.4311	-1.30919	0.439827	-2.9766	0.00291466	0.00746717
BACE2	2333.44	-1.30897	0.132849	-9.85307	6.64838e-23	1.12961e-21
PTPRCAP	1026.08	-1.3067	0.115681	-11.2956	1.37894e-29	3.24868e-28
LRRC63	22.3259	-1.30635	0.402749	-3.24358	0.00118036	0.00328704
ARHGAP12	226.94	-1.30549	0.176479	-7.39744	1.38835e-13	1.25909e-12
LRSAM1	396.171	-1.30299	0.126531	-10.2979	7.20521e-25	1.35381e-23
NUDT7	152.896	-1.30253	0.184748	-7.05033	1.78491e-12	1.47856e-11
SLC2A1	2355.38	-1.30181	0.416615	-3.12472	0.00177972	0.0047666
YBX2	595.857	-1.3016	0.237069	-5.49038	4.01061e-08	2.13829e-07
FAM212A	35.9953	-1.30042	0.313815	-4.1439	3.41452e-05	0.000124079
ILF3-AS1	284.773	-1.29773	0.140666	-9.22559	2.82013e-20	4.12461e-19
ZNF516	160.134	-1.29749	0.265601	-4.88509	1.03381e-06	4.65178e-06
SHQ1	2394.85	-1.29643	0.148704	-8.71816	2.82753e-18	3.61741e-17
PHF21A	703.658	-1.29616	0.199024	-6.51258	7.38727e-11	5.2489e-10
RGS14	591.148	-1.29528	0.168497	-7.68729	1.5028e-14	1.46842e-13
RASA2	457.564	-1.29525	0.149333	-8.67356	4.188e-18	5.2767e-17
LOC101928323	53.1806	-1.29482	0.372401	-3.47694	0.000507166	0.00151158
PLA2G4B	10.1046	-1.29475	0.560854	-2.30853	0.02097	0.043759
FGF13	81.3059	-1.29369	0.245935	-5.26031	1.43814e-07	7.25098e-07
AURKC	13.1669	-1.29346	0.477995	-2.70601	0.00680969	0.0160173
LOC101928054	46.9669	-1.29253	0.352719	-3.66448	0.000247846	0.000780421
GFRA1	515.628	-1.29224	0.249161	-5.18637	2.1443e-07	1.05212e-06
RP11-1072A3.2	42.2395	-1.29175	0.29923	-4.31691	1.5823e-05	6.05561e-05
ZNRF1	2458.63	-1.29104	0.0910511	-14.1793	1.23098e-45	4.90298e-44
TSHR	120.633	-1.291	0.196889	-6.55699	5.49056e-11	3.9488e-10
SMIM14	126.685	-1.29046	0.19253	-6.70261	2.04729e-11	1.54599e-10
TMEM107	265.846	-1.28996	0.299339	-4.30935	1.63738e-05	6.24678e-05
FBXL16	204.581	-1.28892	0.193892	-6.64762	2.97864e-11	2.21184e-10
TNFAIP2	372.109	-1.28887	0.228712	-5.63537	1.74688e-08	9.71303e-08
ITGB3	446.446	-1.28754	0.148336	-8.67986	3.9627e-18	5.00664e-17
UVRAG	637.686	-1.28738	0.129515	-9.94002	2.78771e-23	4.85842e-22
ATG4C	404.067	-1.28712	0.134412	-9.5759	1.00973e-21	1.61645e-20
GABRA3	110.108	-1.28652	0.209075	-6.15338	7.58464e-10	4.87219e-09
LOC100131347	12.0005	-1.28634	0.504827	-2.54808	0.0108317	0.0243664
COL9A3	55.4704	-1.28604	0.27255	-4.71853	2.37557e-06	1.01457e-05
TXNRD3	235.869	-1.28546	0.157832	-8.14445	3.81018e-16	4.18114e-15
RCBTB2	682.581	-1.28465	0.134651	-9.54056	1.42062e-21	2.25059e-20
LOC102723980	28.4844	-1.28356	0.364426	-3.52213	0.000428098	0.00129321
RAD54L	1858.13	-1.28207	0.11437	-11.2099	3.64656e-29	8.35419e-28
KIAA0319L	526.356	-1.28172	0.152666	-8.39562	4.63459e-17	5.46643e-16
RNF44	1735.72	-1.28168	0.124765	-10.2728	9.34991e-25	1.74424e-23
GP1BA	67.7973	-1.28135	0.277238	-4.62183	3.80368e-06	1.58259e-05
THEM6	560.815	-1.27833	0.109961	-11.6253	3.06602e-31	7.63664e-30
METTL21B	144.944	-1.27747	0.202528	-6.30762	2.83357e-10	1.90104e-09
DIP2A	1374.38	-1.27523	0.205125	-6.21683	5.07303e-10	3.31825e-09
RAD9A	809.588	-1.27173	0.124468	-10.2174	1.65804e-24	3.05875e-23
LOC101927837	22.9099	-1.27147	0.402922	-3.15563	0.00160151	0.00432926
NIPSNAP1	1774.85	-1.27137	0.105901	-12.0053	3.33305e-33	9.04077e-32
UBL4A	946.057	-1.27073	0.132218	-9.61082	7.19704e-22	1.16336e-20
OGFOD2	641.357	-1.26906	0.126867	-10.0031	1.47703e-23	2.59894e-22
HYLS1	223.456	-1.26871	0.162756	-7.7952	6.43087e-15	6.50632e-14
PPP1R13L	211.388	-1.26864	0.231638	-5.47681	4.33063e-08	2.30287e-07
ZNF449	145.727	-1.26805	0.238749	-5.31122	1.08895e-07	5.55472e-07
HERC2P3	41.2959	-1.26787	0.30701	-4.12972	3.63201e-05	0.000131284
SESN3	1175.57	-1.26587	0.240545	-5.26252	1.42096e-07	7.17032e-07
KIAA0226L	700.495	-1.26428	0.131139	-9.6408	5.37676e-22	8.77552e-21
KCTD19	140.178	-1.26405	0.241529	-5.23353	1.66305e-07	8.298e-07
LOC101928189	31.9802	-1.26314	0.406685	-3.10595	0.00189669	0.00505104
PLOD1	534.849	-1.262	0.129428	-9.75059	1.83395e-22	3.03973e-21
CAPN14	40.0145	-1.26058	0.316635	-3.9812	6.85695e-05	0.000238189
MYO1F	24.3394	-1.25965	0.394241	-3.19514	0.00139765	0.00383074
LOC100134368	11.4378	-1.25893	0.510701	-2.46511	0.0136971	0.0300469
TNFRSF25	54.4139	-1.25892	0.328224	-3.83556	0.000125278	0.00041597
MESP1	81.1735	-1.25879	0.248466	-5.06627	4.05684e-07	1.92315e-06
LOC101060391	445.242	-1.25879	0.319315	-3.94215	8.0755e-05	0.000277407
KHK	226.615	-1.25796	0.186555	-6.7431	1.55037e-11	1.18282e-10
LOC100505761	150.549	-1.25761	0.171344	-7.33973	2.14033e-13	1.90969e-12
GRM4	11.5015	-1.25678	0.55233	-2.27542	0.0228807	0.0472448
ACBD4	237.615	-1.25536	0.247488	-5.07239	3.92842e-07	1.86786e-06
PACSIN1	72.2355	-1.25502	0.288598	-4.3487	1.36946e-05	5.2965e-05
ORC3	760.681	-1.25419	0.125432	-9.99894	1.54035e-23	2.70776e-22
LOC100128288	19.9618	-1.25365	0.433095	-2.89463	0.00379606	0.00945627
NBEAL2	3674.06	-1.25335	0.112453	-11.1456	7.52419e-29	1.70455e-27
LOC100506538	24.0568	-1.25321	0.415773	-3.01418	0.00257675	0.00668389
ARRB1	357.52	-1.25296	0.232978	-5.378	7.53158e-08	3.89401e-07
HSDL1	2002.24	-1.25211	0.126055	-9.93304	2.98985e-23	5.19093e-22
RAD54B	606.327	-1.25203	0.14247	-8.78801	1.52234e-18	1.9823e-17
TMUB1	1436.44	-1.25097	0.101867	-12.2804	1.15361e-34	3.3005e-33
RHOT1	1198.6	-1.24975	0.131359	-9.514	1.83471e-21	2.87422e-20
AC131097.3	15.7876	-1.24947	0.532057	-2.34839	0.0188549	0.0398643
YEATS2	2204.31	-1.24944	0.203293	-6.146	7.94611e-10	5.09008e-09
LOC100129518	8.89169	-1.24929	0.545026	-2.29216	0.0218963	0.0454741
EFCAB2	109.17	-1.24888	0.213421	-5.85169	4.86593e-09	2.86779e-08
FLOT2	1096.63	-1.24725	0.09952	-12.5327	4.94676e-36	1.4973e-34
PURG	45.0932	-1.24657	0.35095	-3.55199	0.000382327	0.00116476
VPS13C	2886.36	-1.24643	0.122981	-10.1351	3.86033e-24	6.98758e-23
ZNF563	94.5556	-1.24598	0.248794	-5.00808	5.49757e-07	2.5646e-06
MAP4	3026.91	-1.24411	0.108019	-11.5175	1.07694e-30	2.63922e-29
CD72	426.292	-1.24355	0.276437	-4.49848	6.84396e-06	2.75234e-05
DNAH2	32.1449	-1.24275	0.352459	-3.52594	0.000421988	0.00127623
CLMN	367.323	-1.24202	0.283571	-4.37993	1.18715e-05	4.63551e-05
PMS1	549.064	-1.24193	0.113431	-10.9488	6.73536e-28	1.45723e-26
RNF150	151.35	-1.24128	0.175415	-7.07625	1.48102e-12	1.23838e-11
AGAP7	13.5681	-1.24112	0.478292	-2.59491	0.00946163	0.021606
OARD1	458.921	-1.23998	0.148686	-8.33961	7.45354e-17	8.65179e-16
CAPN5	329.956	-1.23965	0.162242	-7.64073	2.15992e-14	2.08708e-13
DYNC1H1	2631.58	-1.23931	0.192428	-6.44042	1.19142e-10	8.32948e-10
FGF17	15.8942	-1.23823	0.458665	-2.69964	0.00694138	0.0162925
NKTR	2385.28	-1.23746	0.152629	-8.1076	5.16296e-16	5.61506e-15
LINC00634	21.296	-1.2367	0.391923	-3.15546	0.00160243	0.00433047
PXN-AS1	33.2534	-1.23569	0.333104	-3.70962	0.000207569	0.000664353
SHMT1	1307.57	-1.23504	0.109455	-11.2836	1.58178e-29	3.70746e-28
TRIM14	1566.24	-1.23458	0.109842	-11.2396	2.60679e-29	6.04021e-28
PDLIM1	2181.64	-1.23399	0.136711	-9.02627	1.77623e-19	2.47508e-18
HIST1H3D	11.7275	-1.23231	0.499428	-2.46745	0.0136078	0.0298797
AKAP2	26.0606	-1.23203	0.400325	-3.07757	0.00208698	0.00550882
LOC102723510	41.4631	-1.23152	0.29128	-4.22795	2.35826e-05	8.78258e-05
ZNF292	1933.77	-1.22986	0.273013	-4.50475	6.64496e-06	2.68116e-05
FAM57B	292.925	-1.22957	0.217744	-5.64685	1.6341e-08	9.1137e-08
FBXO36	160.208	-1.22929	0.225861	-5.44269	5.24806e-08	2.7634e-07
RTN4R	144.829	-1.22748	0.200407	-6.12496	9.07053e-10	5.79006e-09
LOC101926967	61.8238	-1.22682	0.30634	-4.00478	6.20751e-05	0.000217447
RFC5	1907.51	-1.22674	0.084092	-14.5881	3.34402e-48	1.45215e-46
EMR2	177.913	-1.22669	0.185815	-6.60167	4.06554e-11	2.96593e-10
BUB1B	2912.95	-1.22588	0.125941	-9.73379	2.16385e-22	3.57358e-21
LINC00263	77.0285	-1.22574	0.354839	-3.45435	0.000551629	0.00163227
GBAP1	17.8519	-1.22553	0.420949	-2.91135	0.00359875	0.00901266
LOC374443	150.914	-1.22455	0.24582	-4.98148	6.30986e-07	2.91673e-06
JMJD7	102.748	-1.22435	0.212301	-5.76705	8.06699e-09	4.6436e-08
KCTD1	308.569	-1.22401	0.132363	-9.24738	2.30068e-20	3.38655e-19
TMEM121	68.8049	-1.22345	0.264647	-4.62296	3.78307e-06	1.57509e-05
ABCC5	214.77	-1.22292	0.162743	-7.51445	5.71502e-14	5.33889e-13
NSG1	401.326	-1.22244	0.140158	-8.72186	2.73673e-18	3.51108e-17
MNS1	60.5232	-1.22178	0.26591	-4.59472	4.33326e-06	1.7903e-05
PRIM1	862.726	-1.22109	0.105565	-11.5671	6.0466e-31	1.49182e-29
LOC100289230	31.2323	-1.22098	0.39233	-3.11213	0.00185742	0.00495654
FAM8A1	626.295	-1.21979	0.193866	-6.29191	3.13577e-10	2.09379e-09
PXDN	2771.13	-1.21825	0.0976938	-12.4701	1.08677e-35	3.23588e-34
TRAT1	62.5238	-1.21815	0.356071	-3.42109	0.000623716	0.00182299
YPEL2	82.6209	-1.21797	0.30484	-3.99543	6.45765e-05	0.000225475
SAC3D1	831.212	-1.21769	0.100006	-12.1761	4.16634e-34	1.16824e-32
RFX3	152.255	-1.21596	0.208364	-5.83573	5.35545e-09	3.14987e-08
MANEA-AS1	15.2089	-1.21561	0.487325	-2.49445	0.0126152	0.0279147
SCARB2	931.637	-1.21369	0.152816	-7.9422	1.98625e-15	2.07858e-14
AC002116.7	23.6224	-1.21357	0.416883	-2.91104	0.00360225	0.00901894
FAM161A	308.057	-1.21351	0.147146	-8.24696	1.62473e-16	1.83241e-15
C17orf59	251.105	-1.21327	0.176596	-6.87035	6.40455e-12	5.06875e-11
CACNB3	699.769	-1.21285	0.162562	-7.46085	8.59648e-14	7.8896e-13
ADCY7	1622.91	-1.21276	0.125902	-9.63258	5.82459e-22	9.46535e-21
PPP1R35	669.266	-1.21193	0.105468	-11.4909	1.46505e-30	3.5712e-29
TBC1D9B	3894.2	-1.2114	0.10214	-11.8602	1.90454e-32	4.99552e-31
DPY19L1P1	60.544	-1.21079	0.305665	-3.96115	7.45901e-05	0.000257536
FOCAD	763.507	-1.21072	0.114875	-10.5395	5.68125e-26	1.11923e-24
FCGBP	147.45	-1.21056	0.260138	-4.65352	3.2631e-06	1.37109e-05
ANXA11	1394.42	-1.21025	0.107219	-11.2876	1.51069e-29	3.54537e-28
MBD5	181.504	-1.20892	0.201322	-6.00491	1.91443e-09	1.18082e-08
PCAT18	65.0126	-1.20871	0.261653	-4.61952	3.84631e-06	1.59887e-05
ZSCAN2	270.773	-1.20734	0.14573	-8.28479	1.18321e-16	1.35027e-15
HEMGN	32.2244	-1.20683	0.342453	-3.52407	0.000424974	0.00128477
BACE1	114.049	-1.20678	0.21647	-5.57481	2.47796e-08	1.34988e-07
PLCD1	131.505	-1.20676	0.198029	-6.09387	1.10216e-09	6.97222e-09
KCNAB2	10648.6	-1.20635	0.157183	-7.67481	1.6566e-14	1.61267e-13
NAALAD2	22.0817	-1.20623	0.429274	-2.80994	0.00495513	0.0120321
RP11-18H21.1	120.127	-1.2058	0.22357	-5.39339	6.91404e-08	3.59711e-07
DBN1	3446.56	-1.20483	0.121127	-9.94682	2.6036e-23	4.55057e-22
BNIP3L	5273.69	-1.20456	0.234181	-5.14373	2.69335e-07	1.30992e-06
BCL2L2	26.5844	-1.20449	0.427313	-2.81875	0.00482104	0.0117549
CR2	262.609	-1.20436	0.189455	-6.35697	2.05769e-10	1.40107e-09
LRP5	1123.73	-1.20384	0.122808	-9.80258	1.0975e-22	1.84417e-21
ZNF763	30.3375	-1.20326	0.341535	-3.5231	0.000426529	0.00128911
CCBL1	303.153	-1.20299	0.183602	-6.55219	5.66978e-11	4.06969e-10
GUCY2D	172.153	-1.20289	0.251966	-4.77399	1.80611e-06	7.85986e-06
RAD52	275.384	-1.20287	0.165144	-7.28376	3.24649e-13	2.86284e-12
PKIG	277.866	-1.2023	0.135492	-8.87365	7.0789e-19	9.46026e-18
MTHFR	741.503	-1.20201	0.151177	-7.95101	1.84998e-15	1.93818e-14
RMI2	316.018	-1.20197	0.187861	-6.3982	1.57223e-10	1.08466e-09
LEF1-AS1	140.657	-1.20179	0.200326	-5.99918	1.98315e-09	1.22156e-08
EFTUD1	963.94	-1.20165	0.142622	-8.4254	3.59532e-17	4.25435e-16
MINK1	1102.77	-1.20064	0.181278	-6.62321	3.51489e-11	2.58381e-10
LINC00910	19.8503	-1.20063	0.399666	-3.00408	0.00266387	0.00688817
BCL7A	2000.92	-1.20008	0.104745	-11.4572	2.16308e-30	5.23088e-29
2022-03-09	711.149	-1.19999	0.110273	-10.882	1.40454e-27	3.00676e-26
NKAIN2	43.4011	-1.1991	0.308615	-3.88541	0.000102157	0.000344136
UNC93B1	402.338	-1.19679	0.134123	-8.9231	4.53435e-19	6.14962e-18
ZFP14	187.624	-1.19522	0.204928	-5.8324	5.46358e-09	3.20968e-08
PCBP4	604.731	-1.19495	0.128543	-9.29618	1.45586e-20	2.17273e-19
NADK2	858.044	-1.19478	0.107508	-11.1134	1.08016e-28	2.42003e-27
SPTBN2	907.637	-1.19407	0.141128	-8.4609	2.65322e-17	3.17449e-16
TMEM9	513.312	-1.1931	0.152364	-7.83061	4.85517e-15	4.96155e-14
TANC2	711.664	-1.1924	0.193338	-6.16742	6.94122e-10	4.47459e-09
MTO1	1122.81	-1.19208	0.119416	-9.98255	1.81733e-23	3.18547e-22
TRAF3IP3	1473.92	-1.19158	0.116794	-10.2024	1.93414e-24	3.56093e-23
PITPNC1	447.951	-1.19079	0.131006	-9.08961	9.9396e-20	1.4043e-18
JPH1	461.535	-1.19056	0.165427	-7.19688	6.16061e-13	5.31265e-12
AIFM2	18.732	-1.18919	0.468757	-2.53691	0.0111837	0.0250656
FAM63A	110.302	-1.18805	0.208267	-5.70446	1.16715e-08	6.58576e-08
PCIF1	1268.95	-1.18795	0.129134	-9.19938	3.60011e-20	5.2319e-19
SERINC4	168.297	-1.18795	0.303608	-3.91278	9.12399e-05	0.000310161
STC2	962.134	-1.18786	0.271062	-4.38223	1.17473e-05	4.59092e-05
HESX1	50.2143	-1.18703	0.324911	-3.65339	0.000258803	0.000812402
ITGA1	141.67	-1.18625	0.179051	-6.62522	3.4672e-11	2.55286e-10
SNPH	217.973	-1.18597	0.169826	-6.98341	2.88104e-12	2.33678e-11
LOC100506286	16.5452	-1.18569	0.469306	-2.52647	0.0115214	0.0257532
C10orf12	201.656	-1.18471	0.230766	-5.13381	2.83941e-07	1.3751e-06
UCP2	1009.01	-1.18447	0.114056	-10.385	2.90242e-25	5.60317e-24
NRADDP	11.3777	-1.18437	0.50202	-2.3592	0.0183144	0.0388562
UNC5CL	69.8539	-1.18432	0.250407	-4.72958	2.24983e-06	9.66207e-06
PACS1	1201.42	-1.18424	0.157859	-7.50192	6.28919e-14	5.84837e-13
SPEF2	46.2367	-1.18378	0.299078	-3.95811	7.55449e-05	0.000260686
GOLGA8N-2	13.5444	-1.18341	0.459671	-2.57448	0.0100391	0.022771
TTC30A	268.01	-1.18324	0.168226	-7.03365	2.01204e-12	1.65844e-11
GNAZ	33.3073	-1.18263	0.328463	-3.60051	0.000317588	0.000982925
SLC7A8	54.1219	-1.1822	0.273884	-4.31643	1.58573e-05	6.06744e-05
SLC2A1-AS1	18.6096	-1.18216	0.509237	-2.32143	0.0202638	0.0425038
ALDH6A1	360.008	-1.18139	0.148539	-7.95335	1.81529e-15	1.90403e-14
FBXW8	385.062	-1.18126	0.132476	-8.91682	4.79889e-19	6.50357e-18
USP49	960.184	-1.18121	0.182572	-6.46983	9.81109e-11	6.90401e-10
PNMAL2	49.2063	-1.18055	0.280552	-4.20795	2.57693e-05	9.54447e-05
ATG13	3935.41	-1.179	0.0946349	-12.4585	1.25784e-35	3.73917e-34
TARBP1	1539.82	-1.17882	0.122654	-9.61093	7.18997e-22	1.16325e-20
PCYT1B	12.3609	-1.17839	0.477051	-2.47016	0.0135051	0.0296791
STOX2	181.998	-1.17812	0.202807	-5.8091	6.28105e-09	3.67104e-08
SEMA4C	90.0815	-1.1777	0.279574	-4.21249	2.52567e-05	9.36219e-05
SPTAN1	8761.83	-1.17764	0.114762	-10.2616	1.0497e-24	1.95624e-23
MPHOSPH9	2311.28	-1.17743	0.147734	-7.96994	1.58748e-15	1.66987e-14
KIAA1549	584.632	-1.17507	0.163811	-7.17329	7.32142e-13	6.2811e-12
LDB1	1370.53	-1.17452	0.107455	-10.9304	8.24843e-28	1.78038e-26
CPB2-AS1	18.9605	-1.17241	0.423079	-2.77113	0.00558613	0.0134076
CCDC107	131.155	-1.17236	0.183456	-6.39044	1.65405e-10	1.13812e-09
C1QL4	41.1333	-1.17211	0.323783	-3.62005	0.00029455	0.000915811
DOCK11	1263.83	-1.17095	0.121919	-9.60434	7.66464e-22	1.23567e-20
LPCAT4	619.686	-1.17057	0.235785	-4.96455	6.88604e-07	3.16945e-06
RNF157	313.205	-1.16988	0.140877	-8.30427	1.00434e-16	1.15263e-15
LINC00341	129.176	-1.16934	0.247641	-4.72191	2.33645e-06	9.99181e-06
HES6	364.012	-1.16864	0.188384	-6.20351	5.52165e-10	3.59625e-09
EVA1B	156.968	-1.16847	0.306663	-3.81028	0.00013881	0.000457001
UTRN	371.763	-1.16822	0.165658	-7.05199	1.76372e-12	1.46166e-11
PANK1	195.946	-1.16822	0.183694	-6.35958	2.0231e-10	1.37854e-09
AZI1	970.151	-1.16728	0.144795	-8.06158	7.53121e-16	8.09915e-15
LEPR	120.581	-1.16607	0.254545	-4.58099	4.62789e-06	1.90385e-05
2022-09-09	23487.6	-1.16564	0.0946049	-12.3211	6.97176e-35	2.01355e-33
FBXO44	679.231	-1.16467	0.140951	-8.26292	1.42153e-16	1.61218e-15
LOC285074	187.008	-1.16466	0.276847	-4.20687	2.58927e-05	9.58824e-05
IFIT1	25.4724	-1.16463	0.364332	-3.19661	0.00139051	0.00381472
ZYG11B	462.511	-1.16458	0.190253	-6.12121	9.28664e-10	5.91768e-09
MRI1	328.757	-1.16248	0.137712	-8.44135	3.13704e-17	3.73381e-16
ARL4C	1282.55	-1.16243	0.144736	-8.03138	9.63824e-16	1.02804e-14
ZNF433	19.4448	-1.16223	0.423405	-2.74497	0.00605165	0.0144283
FAM214B	260.388	-1.16212	0.174795	-6.64849	2.96114e-11	2.20243e-10
DDX25	249.879	-1.16148	0.200551	-5.79146	6.97781e-09	4.05107e-08
BCORL1	639.665	-1.16115	0.137044	-8.47281	2.39542e-17	2.87545e-16
RIPK4	498.323	-1.16085	0.166659	-6.96544	3.27381e-12	2.64597e-11
FAM117A	604.071	-1.15992	0.158241	-7.33012	2.29949e-13	2.04969e-12
GAB2	131.273	-1.15957	0.315272	-3.67799	0.000235082	0.000743817
GIMAP2	1049.04	-1.15946	0.113739	-10.194	2.10856e-24	3.87425e-23
INPPL1	1165.97	-1.15924	0.19545	-5.93116	3.00801e-09	1.81553e-08
LOC100128361	43.1696	-1.15883	0.338079	-3.4277	0.000608724	0.0017823
CRAT	621.935	-1.1586	0.151402	-7.65242	1.97225e-14	1.91079e-13
LOC101926948	12.3573	-1.15828	0.50209	-2.30692	0.0210593	0.0439305
ANKRD44	306.946	-1.15821	0.140906	-8.21974	2.03945e-16	2.28324e-15
PHRF1-2	23.1302	-1.15812	0.368774	-3.14046	0.00168686	0.00453645
DYM	860.861	-1.15775	0.118908	-9.73654	2.10604e-22	3.48125e-21
LOC100128494	26.6076	-1.15765	0.431872	-2.68054	0.00735029	0.0171575
EIF2AK4	1668.13	-1.15711	0.102991	-11.235	2.74415e-29	6.33441e-28
ARL3	632.3	-1.15634	0.123564	-9.35824	8.10722e-21	1.22797e-19
WDR76	2644.58	-1.15614	0.130655	-8.8488	8.84656e-19	1.17198e-17
CREB3L4	145.777	-1.15469	0.185799	-6.21474	5.14099e-10	3.3591e-09
DDX11-AS1	16.6568	-1.15459	0.441818	-2.61328	0.00896781	0.020576
FXYD6	33.7929	-1.15453	0.377292	-3.06004	0.00221307	0.00581228
LOC102724733	24.7558	-1.15414	0.371406	-3.10748	0.00188692	0.0050272
NEK5	15.7238	-1.1535	0.461123	-2.5015	0.0123669	0.0274416
PHF7	365.454	-1.1514	0.138104	-8.33722	7.60589e-17	8.81743e-16
NUDT8	558.43	-1.1512	0.116546	-9.87758	5.20733e-23	8.91389e-22
TTLL12	1919.91	-1.15063	0.194772	-5.90756	3.47204e-09	2.07845e-08
TRAPPC9	787.427	-1.15056	0.137525	-8.36617	5.9523e-17	6.96225e-16
RP11-538P18.2	89.4332	-1.14965	0.226926	-5.0662	4.05838e-07	1.92315e-06
ARHGAP35	1237.04	-1.14957	0.105684	-10.8775	1.47613e-27	3.15265e-26
MYB	4992.89	-1.14953	0.100518	-11.436	2.76306e-30	6.66415e-29
APOL3	205.45	-1.14948	0.156432	-7.34815	2.00974e-13	1.79844e-12
S100PBP	693.201	-1.14941	0.164998	-6.96622	3.25562e-12	2.63243e-11
METRN	414.487	-1.1494	0.123649	-9.29563	1.4634e-20	2.1822e-19
BCAT2	763.509	-1.14899	0.111996	-10.2592	1.07619e-24	2.00356e-23
SERPINF1	76.2559	-1.14864	0.24003	-4.78541	1.70641e-06	7.45618e-06
CAMK2G	1042.85	-1.1485	0.111767	-10.2758	9.05745e-25	1.6914e-23
TONSL	2009.71	-1.14646	0.124788	-9.18725	4.03022e-20	5.84302e-19
RMI1	1040.69	-1.14575	0.120139	-9.53687	1.47201e-21	2.32999e-20
GRID2IP	26.2439	-1.14536	0.356703	-3.21097	0.00132289	0.00364342
MARCKS	43.661	-1.14387	0.37876	-3.02004	0.00252744	0.00656444
PML	1130.55	-1.14295	0.116987	-9.76992	1.51576e-22	2.52608e-21
APH1B	340.196	-1.14261	0.142866	-7.99774	1.2672e-15	1.34145e-14
GYS1	2150.16	-1.14137	0.14685	-7.77236	7.70393e-15	7.73015e-14
PAIP2B	260.732	-1.13783	0.267019	-4.26123	2.03304e-05	7.65405e-05
KDM4C	1144.85	-1.13731	0.133431	-8.52359	1.54689e-17	1.88284e-16
CD1B	157.239	-1.13668	0.19018	-5.97685	2.27499e-09	1.39288e-08
ZNF248	414.534	-1.13596	0.142587	-7.96677	1.6288e-15	1.71038e-14
GPR174	513.305	-1.13579	0.1783	-6.37012	1.88881e-10	1.29137e-09
ZDHHC8	811.637	-1.13564	0.12147	-9.34913	8.83713e-21	1.32972e-19
MAPK14	2325.82	-1.13526	0.102773	-11.0463	2.28506e-28	5.03926e-27
LINC00471	25.0851	-1.13289	0.378276	-2.99487	0.00274559	0.00708167
LOC101927181	72.8096	-1.13222	0.28918	-3.91527	9.03018e-05	0.000307315
C10orf91	27.2802	-1.13091	0.361044	-3.13234	0.0017342	0.00465356
GNAQ	3069.63	-1.13001	0.0789855	-14.3066	1.99118e-46	8.14379e-45
VIPR2	381.216	-1.12981	0.197309	-5.7261	1.02763e-08	5.84542e-08
C11orf35-2	16.9719	-1.12973	0.442998	-2.5502	0.010766	0.0242364
GNG2	1350.72	-1.12959	0.117854	-9.58465	9.2771e-22	1.49037e-20
GTSE1-AS1	35.6391	-1.12936	0.315835	-3.57578	0.000349189	0.0010704
CHKB	17.6399	-1.12825	0.461264	-2.446	0.0144449	0.0314904
TEAD4	311.263	-1.12768	0.152792	-7.38052	1.57673e-13	1.4235e-12
ZEB1-AS1	199.798	-1.12759	0.265909	-4.24049	2.23029e-05	8.33318e-05
FZD3	345.892	-1.12668	0.164519	-6.84833	7.47174e-12	5.87267e-11
NINL	802.46	-1.12659	0.198394	-5.67854	1.35852e-08	7.61857e-08
RCBTB1	1079.41	-1.126	0.100515	-11.2023	3.97142e-29	9.07568e-28
ZNF692	771.255	-1.12584	0.133455	-8.43608	3.28146e-17	3.90063e-16
THEMIS2	129.447	-1.12566	0.186458	-6.03705	1.56959e-09	9.76011e-09
LOC100272217	15.8262	-1.12509	0.450828	-2.49562	0.0125738	0.0278432
PARP15	174.384	-1.12487	0.172275	-6.52949	6.59925e-11	4.71648e-10
NMRK1	327.642	-1.12452	0.129421	-8.68885	3.66128e-18	4.64186e-17
LOC101927803	47.0085	-1.12445	0.314057	-3.58042	0.000343049	0.0010537
PRKCB	3130.91	-1.12401	0.0837238	-13.4253	4.29976e-41	1.4973e-39
MRPL34	739.21	-1.12394	0.124473	-9.02964	1.72233e-19	2.4018e-18
DPEP2	56.8433	-1.12386	0.321412	-3.49662	0.000471196	0.00141196
ITGA5	1743.62	-1.12341	0.233768	-4.80564	1.54261e-06	6.79237e-06
TFAP2A	528.657	-1.12303	0.271872	-4.13072	3.61626e-05	0.000130812
MFI2-AS1	111.013	-1.12299	0.328037	-3.42335	0.000618536	0.001809
HERC2P2	184.931	-1.12199	0.169681	-6.61236	3.78244e-11	2.77046e-10
STARD9	538.128	-1.12062	0.144749	-7.74182	9.80024e-15	9.7586e-14
GABARAPL1	575.556	-1.12029	0.180889	-6.19322	5.89479e-10	3.82565e-09
DISC1FP1	58.2157	-1.12014	0.26461	-4.23317	2.30417e-05	8.60042e-05
ANO8	723.852	-1.11949	0.174372	-6.42011	1.36172e-10	9.47297e-10
IQCH-AS1	43.6058	-1.11929	0.313138	-3.57444	0.000350972	0.00107533
RND2	128.186	-1.11888	0.193885	-5.77083	7.88825e-09	4.54787e-08
SSBP2	982.512	-1.11885	0.10509	-10.6467	1.80734e-26	3.65103e-25
LINC00938	277.218	-1.11759	0.245363	-4.55483	5.2428e-06	2.14619e-05
LOC102724562	33.6356	-1.11752	0.422147	-2.64722	0.00811567	0.0187645
RPE	481.47	-1.11701	0.136942	-8.15679	3.44039e-16	3.78671e-15
TPD52	3332.72	-1.11672	0.121526	-9.18917	3.9588e-20	5.74403e-19
BRICD5	216.04	-1.11664	0.197088	-5.66569	1.46431e-08	8.18672e-08
MAPK12	299.614	-1.11647	0.144814	-7.70973	1.26083e-14	1.24463e-13
LOC102723959	54.23	-1.11628	0.272159	-4.10156	4.10366e-05	0.000147306
SF3B1	8751.03	-1.11566	0.101981	-10.9398	7.43327e-28	1.60632e-26
RP11-761I4.3	13.2518	-1.11481	0.487161	-2.28838	0.0221156	0.0458462
THY1	299.763	-1.11447	0.175365	-6.35517	2.082e-10	1.41657e-09
GAS2	276.797	-1.11442	0.176873	-6.30069	2.96328e-10	1.98587e-09
SCAPER	614.978	-1.11389	0.192428	-5.78862	7.09686e-09	4.11496e-08
SPICE1	497.101	-1.11348	0.210564	-5.28808	1.23608e-07	6.27898e-07
GPR124	447.271	-1.11346	0.115919	-9.60554	7.57581e-22	1.22243e-20
SV2A	835.343	-1.11304	0.121817	-9.13699	6.42158e-20	9.17182e-19
BIVM	335.83	-1.11296	0.129388	-8.60169	7.85531e-18	9.71656e-17
FAM171A2	311.952	-1.1108	0.140796	-7.88946	3.03505e-15	3.14017e-14
GPHN	571.212	-1.1108	0.159344	-6.9711	3.1447e-12	2.54499e-11
INTS1	6594.88	-1.11061	0.193751	-5.73216	9.91625e-09	5.65291e-08
TPM2	576.42	-1.11042	0.281287	-3.94763	7.89279e-05	0.000271651
TLX2	157.071	-1.11032	0.176043	-6.30707	2.84362e-10	1.90708e-09
UBR2	1641.75	-1.11023	0.124326	-8.93001	4.25981e-19	5.80436e-18
KIAA1841	144.981	-1.1102	0.218112	-5.09005	3.5797e-07	1.71006e-06
DENND2D	389.969	-1.10972	0.137573	-8.06644	7.23799e-16	7.79759e-15
CD8B	49.0671	-1.10847	0.270593	-4.09645	4.19543e-05	0.000150276
ITGAL	6161.16	-1.10836	0.131386	-8.43595	3.28511e-17	3.90243e-16
MIR600HG	185.83	-1.10694	0.221719	-4.99252	5.95955e-07	2.76459e-06
IFFO1	521.682	-1.10654	0.150744	-7.3405	2.12804e-13	1.89965e-12
APBA1	32.1145	-1.10602	0.353026	-3.13296	0.00173054	0.00464442
ZC3H12B	106.045	-1.10581	0.215458	-5.13237	2.8612e-07	1.38529e-06
C19orf68	268.18	-1.10577	0.177406	-6.23302	4.57521e-10	3.00661e-09
PLXDC1	35.6098	-1.10565	0.368752	-2.99837	0.0027143	0.00701085
MTHFD1	4423.45	-1.105	0.130202	-8.48682	2.12373e-17	2.55771e-16
PAPLN	199.224	-1.1045	0.197266	-5.59905	2.15532e-08	1.18329e-07
POMT1	1130.7	-1.10413	0.133916	-8.245	1.65154e-16	1.8615e-15
EEF2K	560.72	-1.10413	0.117311	-9.41194	4.8704e-21	7.46359e-20
RNF125	146.624	-1.10388	0.174541	-6.32446	2.54117e-10	1.71368e-09
DGKZ	2399.77	-1.10279	0.121297	-9.09165	9.75488e-20	1.37926e-18
SAP25	196.887	-1.10273	0.243909	-4.5211	6.15205e-06	2.49604e-05
SLC25A35	111.895	-1.10254	0.244258	-4.51384	6.36632e-06	2.57898e-05
TRIM3	224.444	-1.10251	0.16562	-6.65685	2.79757e-11	2.085e-10
TSKU	118.4	-1.10192	0.18987	-5.80352	6.49355e-09	3.78667e-08
ADAMTS20	20.0612	-1.10189	0.451823	-2.43877	0.0147372	0.0320508
SMAD9	20.0717	-1.10165	0.452054	-2.43698	0.0148104	0.0321764
UNC119	444.6	-1.10129	0.159861	-6.88908	5.61555e-12	4.45782e-11
SAT2	307.662	-1.10084	0.186077	-5.91602	3.29819e-09	1.98086e-08
C4orf21	1223.36	-1.10068	0.181735	-6.05652	1.39094e-09	8.69375e-09
SIRT3	295.7	-1.10014	0.171473	-6.41578	1.401e-10	9.73512e-10
TMPRSS5	14.035	-1.09998	0.455487	-2.41496	0.015737	0.0339274
FAM110C	721.501	-1.09987	0.180514	-6.09295	1.10848e-09	7.00732e-09
CD1E	325.245	-1.09949	0.128193	-8.57687	9.74939e-18	1.20431e-16
NFYC-AS1	35.8592	-1.0992	0.343763	-3.19754	0.00138606	0.00380422
MPPED2	419.31	-1.09888	0.156621	-7.01616	2.28044e-12	1.86788e-11
FAM193B	1475.12	-1.09852	0.18488	-5.94181	2.81897e-09	1.70763e-08
RUFY3	969.294	-1.0984	0.142617	-7.70172	1.34244e-14	1.3209e-13
DHRS4L2	438.246	-1.09797	0.115224	-9.52903	1.58755e-21	2.49773e-20
AKAP6	55.2521	-1.09794	0.280984	-3.90749	9.32607e-05	0.000316443
FAM195A	511.518	-1.09777	0.138669	-7.91645	2.44379e-15	2.55008e-14
ZNF837	103.815	-1.09746	0.218878	-5.01401	5.33061e-07	2.49053e-06
RNPEPL1	1352.48	-1.09713	0.120568	-9.09962	9.06512e-20	1.28372e-18
PPP2R5B	773.33	-1.09683	0.263789	-4.15796	3.21103e-05	0.000117244
C12orf76	177.488	-1.09682	0.273734	-4.00689	6.15236e-05	0.000215598
VEGFB	981.89	-1.09591	0.140395	-7.80593	5.90645e-15	5.99565e-14
SPIDR	768.104	-1.09559	0.123897	-8.84272	9.34178e-19	1.2349e-17
PRSS30P	175.707	-1.09555	0.33131	-3.30671	0.000943973	0.00267561
HMX2	52.3038	-1.09395	0.326537	-3.35017	0.000807625	0.00231535
ZNF480	588.698	-1.09385	0.193738	-5.64602	1.64209e-08	9.15544e-08
SNTA1	357.537	-1.09381	0.163789	-6.67815	2.4198e-11	1.8101e-10
PTP4A2	8651.77	-1.09378	0.0806583	-13.5606	6.85464e-42	2.44759e-40
DIS3L	994.18	-1.09249	0.143899	-7.59202	3.14954e-14	3.00208e-13
CA5B	63.2782	-1.09241	0.271949	-4.01696	5.89535e-05	0.000206988
SMYD3	508.619	-1.0906	0.126019	-8.65427	4.96094e-18	6.2078e-17
COX15	952.195	-1.09029	0.105883	-10.2971	7.26118e-25	1.36221e-23
DNASE1L1	67.6984	-1.09019	0.260776	-4.18056	2.90797e-05	0.000106883
RNF214	476.061	-1.09002	0.139048	-7.83915	4.53603e-15	4.65363e-14
C11orf45	70.515	-1.08919	0.251607	-4.32895	1.49823e-05	5.75919e-05
ARL2	423.189	-1.08915	0.128997	-8.4432	3.08764e-17	3.67741e-16
FAM184A	433.462	-1.08878	0.18021	-6.0417	1.52496e-09	9.49242e-09
HTT	2127.62	-1.08858	0.111466	-9.76595	1.57627e-22	2.62453e-21
MZB1	1406.85	-1.08839	0.0961654	-11.3178	1.07066e-29	2.53547e-28
RALGPS2	521.525	-1.08741	0.213125	-5.10222	3.3569e-07	1.60994e-06
CYFIP2	8564.88	-1.0868	0.145877	-7.45008	9.32861e-14	8.55294e-13
LOC158960	44.8997	-1.08677	0.299512	-3.62848	0.000285099	0.000888845
SOGA2	395.264	-1.0854	0.129647	-8.37192	5.66876e-17	6.63909e-16
RGS12	1001.07	-1.08531	0.160353	-6.7683	1.303e-11	1.00048e-10
RNFT2	174.231	-1.0853	0.165102	-6.57353	4.91348e-11	3.55474e-10
ACN9	350.51	-1.08497	0.13725	-7.90502	2.67895e-15	2.78592e-14
CEP57L1	423.775	-1.08439	0.141588	-7.65875	1.87755e-14	1.82098e-13
CD247	1511.15	-1.08398	0.11253	-9.63277	5.81389e-22	9.45637e-21
KDM1A	4008.49	-1.0837	0.0934843	-11.5923	4.50683e-31	1.11796e-29
FANCC	437.889	-1.0833	0.140597	-7.70504	1.30801e-14	1.28911e-13
TREX1	335.669	-1.08201	0.142355	-7.6008	2.94316e-14	2.80976e-13
C1orf21	364.885	-1.08068	0.126423	-8.54812	1.25106e-17	1.534e-16
PCCA	186.324	-1.08007	0.189245	-5.70724	1.14824e-08	6.48904e-08
STK39	2178.23	-1.08003	0.096969	-11.1379	8.20134e-29	1.85107e-27
LOC101928830	29.2876	-1.07993	0.363538	-2.97061	0.00297207	0.00759723
BNIP3	3867.9	-1.07985	0.394553	-2.73691	0.00620198	0.0147387
IMPDH1	1310.6	-1.07941	0.12941	-8.34104	7.36376e-17	8.55301e-16
PITX1	202.363	-1.0792	0.159563	-6.7635	1.34694e-11	1.03292e-10
AIF1L	199.402	-1.07912	0.152172	-7.09147	1.32692e-12	1.11381e-11
MAP3K3	856.931	-1.07872	0.155296	-6.94621	3.75225e-12	3.01931e-11
MEX3A	226.195	-1.07856	0.146592	-7.35755	1.87313e-13	1.68278e-12
EHBP1L1	1199.67	-1.07846	0.116316	-9.27184	1.8297e-20	2.71074e-19
LOC100506405	263.745	-1.07747	0.205124	-5.2528	1.49806e-07	7.52198e-07
CAT	1150.53	-1.07718	0.0940947	-11.4478	2.41116e-30	5.82311e-29
SCN9A	25.5157	-1.07695	0.420172	-2.56312	0.0103736	0.0234484
ACAD11	37.4954	-1.07631	0.31946	-3.36916	0.000753967	0.00217242
COL9A2	144.519	-1.07591	0.196847	-5.4657	4.61096e-08	2.44483e-07
MGAT1	1875.8	-1.07535	0.138541	-7.76195	8.36367e-15	8.36916e-14
CENPJ	792.223	-1.07503	0.130898	-8.21277	2.16144e-16	2.41389e-15
SDHA	3852.54	-1.07463	0.13115	-8.19389	2.5292e-16	2.81258e-15
LDOC1L	1758.43	-1.07428	0.116888	-9.19072	3.90222e-20	5.66643e-19
MAGI1	195.934	-1.07417	0.216911	-4.95214	7.34028e-07	3.37004e-06
NT5DC1	642.156	-1.07385	0.126162	-8.51168	1.71436e-17	2.07976e-16
WNT1	40.3924	-1.07368	0.335137	-3.20372	0.00135665	0.00372685
PLGLB2	21.163	-1.07358	0.390698	-2.74787	0.00599847	0.0143183
ZNF438	202.638	-1.07299	0.173568	-6.18198	6.33006e-10	4.10086e-09
LOC389765	56.8863	-1.0729	0.268231	-3.99994	6.33596e-05	0.000221607
SCMH1	1079.07	-1.07241	0.108452	-9.8883	4.67883e-23	8.02424e-22
CENPT	1318.47	-1.0724	0.178945	-5.99291	2.06117e-09	1.26748e-08
CTNNBIP1	601.77	-1.0724	0.131218	-8.17263	3.01729e-16	3.34114e-15
LOC101929004	42.3172	-1.07206	0.325592	-3.29265	0.000992474	0.00280569
SCLY	54.0855	-1.0717	0.265412	-4.03787	5.39385e-05	0.000190478
HERC5	897.512	-1.07098	0.104831	-10.2163	1.67698e-24	3.09058e-23
CYTH1	2234.09	-1.07062	0.119891	-8.92998	4.26072e-19	5.80436e-18
2022-03-02	220.026	-1.0706	0.160244	-6.68107	2.37208e-11	1.77877e-10
TSNARE1	264.7	-1.06877	0.150828	-7.08604	1.38004e-12	1.15627e-11
CALCOCO2	2040.76	-1.06817	0.0999192	-10.6904	1.12901e-26	2.31396e-25
KMT2E	1848.96	-1.06786	0.19007	-5.61826	1.92891e-08	1.067e-07
TCERG1	3059.51	-1.06766	0.104129	-10.2532	1.14441e-24	2.12407e-23
GCDH	625.467	-1.06678	0.179107	-5.95611	2.58313e-09	1.57363e-08
ZNF385A	176.291	-1.06552	0.196659	-5.41809	6.02375e-08	3.15006e-07
C20orf96	440.569	-1.06547	0.157553	-6.7626	1.35541e-11	1.03897e-10
ATG16L2	535.817	-1.0643	0.187184	-5.68583	1.30181e-08	7.3162e-08
TBCK	243.049	-1.06429	0.150642	-7.06502	1.60597e-12	1.33578e-11
ZBTB44	2102.36	-1.06413	0.169054	-6.29462	3.08149e-10	2.05981e-09
TBC1D5	1720.28	-1.06404	0.133398	-7.97643	1.50627e-15	1.58718e-14
GIMAP6	735.089	-1.0639	0.131533	-8.08848	6.04163e-16	6.53182e-15
SLC12A4	645.642	-1.0629	0.164396	-6.46546	1.00994e-10	7.09873e-10
MAP3K14-AS1	204.256	-1.0628	0.213064	-4.98818	6.09493e-07	2.82309e-06
TMEFF1	39.7461	-1.06146	0.324958	-3.26646	0.00108902	0.00305126
CBY3	16.8513	-1.06081	0.422442	-2.51113	0.0120345	0.0267773
KSR2	490.61	-1.06062	0.215086	-4.93115	8.17486e-07	3.72979e-06
PIGL	190.072	-1.06008	0.175072	-6.05513	1.40303e-09	8.76506e-09
PRIM2	774.698	-1.06006	0.127504	-8.31392	9.259e-17	1.06797e-15
ZBED4	3956	-1.05977	0.0994165	-10.6599	1.56692e-26	3.17587e-25
SMARCA2	735.416	-1.05974	0.135315	-7.83163	4.8157e-15	4.92673e-14
SLC8B1	943.791	-1.05964	0.151535	-6.99274	2.69563e-12	2.19126e-11
RNASE4	99.3044	-1.05871	0.299798	-3.53142	0.000413339	0.00125214
FAM160B1	1716.53	-1.0571	0.128526	-8.22476	1.95579e-16	2.1936e-15
FLJ20464	68.3975	-1.05673	0.320935	-3.29267	0.000992398	0.00280569
C19orf54	613.791	-1.05548	0.155942	-6.76844	1.30179e-11	9.99969e-11
EIF4EBP1	347.259	-1.05503	0.173842	-6.06889	1.288e-09	8.07521e-09
AARS	4670.2	-1.05465	0.102867	-10.2525	1.15278e-24	2.13743e-23
PLA2G6	758.782	-1.05459	0.209853	-5.02536	5.0248e-07	2.35306e-06
ST5	96.8466	-1.05399	0.220307	-4.7842	1.71667e-06	7.49742e-06
XPC	1147.59	-1.05389	0.103974	-10.1361	3.8195e-24	6.92053e-23
EFNA4	105.149	-1.05348	0.250512	-4.20531	2.60723e-05	9.64342e-05
SPG11	1152.92	-1.05307	0.172319	-6.11117	9.89055e-10	6.28717e-09
KIAA0195	1233.04	-1.05293	0.164372	-6.40578	1.49605e-10	1.03641e-09
MST1P2	145.594	-1.05258	0.299314	-3.51664	0.000437051	0.00131851
EFCAB4A	234.377	-1.05171	0.269016	-3.90946	9.25012e-05	0.00031404
HK2	2350.6	-1.05107	0.207793	-5.05827	4.23083e-07	1.99866e-06
FANCG	1355.5	-1.05102	0.105544	-9.95814	2.3238e-23	4.06543e-22
COPG2	1292.88	-1.05095	0.0980762	-10.7157	8.59424e-27	1.76539e-25
SNX32	16.8385	-1.05076	0.438082	-2.39854	0.0164608	0.0353211
TRIM13	538.572	-1.05074	0.125444	-8.37617	5.46763e-17	6.42412e-16
LOC100507412	60.5746	-1.04996	0.252107	-4.16475	3.11689e-05	0.000114126
ADAD2	64.8757	-1.04968	0.266508	-3.93864	8.1946e-05	0.000280918
NPM2	35.3497	-1.04857	0.344728	-3.04172	0.00235229	0.00614525
LOC102724248	95.0216	-1.04833	0.236804	-4.42698	9.5563e-06	3.76851e-05
PDE10A	178.812	-1.04655	0.342319	-3.05723	0.0022339	0.00586278
PIKFYVE	3194.67	-1.04612	0.10177	-10.2792	8.74635e-25	1.63498e-23
ATP6V0E2	1118.99	-1.04402	0.165854	-6.29482	3.07761e-10	2.05797e-09
SFI1	1423.05	-1.04355	0.122122	-8.54514	1.28377e-17	1.57305e-16
TMEM86B	445.916	-1.04254	0.153193	-6.80539	1.00779e-11	7.83687e-11
RAC3	399.975	-1.04236	0.159656	-6.52879	6.63018e-11	4.73673e-10
WDR27	270.892	-1.04218	0.170674	-6.10629	1.01975e-09	6.4778e-09
TTLL1	182.737	-1.04167	0.17938	-5.80705	6.35841e-09	3.71269e-08
RSAD2	135.806	-1.04162	0.182315	-5.71332	1.10796e-08	6.27113e-08
HSH2D	136.022	-1.04155	0.181176	-5.74884	8.98597e-09	5.15151e-08
CD28	1825.35	-1.04139	0.0899276	-11.5804	5.18253e-31	1.2821e-29
WDFY2	371.663	-1.04081	0.177539	-5.86243	4.56144e-09	2.69703e-08
DSG1	21.7636	-1.04026	0.389777	-2.66886	0.007611	0.0177118
GMDS-AS1	68.813	-1.03989	0.312765	-3.32485	0.000884677	0.00251926
ARHGAP1	1549.76	-1.03959	0.108652	-9.56806	1.08935e-21	1.74209e-20
PSIP1	3164.13	-1.03948	0.0991516	-10.4837	1.02619e-25	2.00436e-24
FAM149A	53.1572	-1.03938	0.271766	-3.82454	0.000131016	0.000433685
RASSF7	21.6687	-1.0389	0.42839	-2.42513	0.0153028	0.0331201
ARID5B	443.081	-1.0388	0.198357	-5.23704	1.63174e-07	8.15511e-07
SLC39A11	419.58	-1.03824	0.139726	-7.43052	1.08171e-13	9.87313e-13
CASP6	317.346	-1.03806	0.188952	-5.49377	3.93448e-08	2.10076e-07
CLEC11A	1142.48	-1.03777	0.157017	-6.60928	3.86192e-11	2.8264e-10
SLC48A1	469.727	-1.03722	0.14354	-7.22601	4.97399e-13	4.32198e-12
LINC01003	140.888	-1.03529	0.219352	-4.71977	2.36106e-06	1.00915e-05
TMEM184A	152.119	-1.03504	0.248719	-4.16149	3.16175e-05	0.00011556
PPP1R21	251.707	-1.03485	0.147849	-6.99937	2.57107e-12	2.09374e-11
TCF4	299.508	-1.0341	0.137978	-7.49465	6.64763e-14	6.16288e-13
NME4	2210.31	-1.03386	0.111646	-9.26019	2.04069e-20	3.01599e-19
TMEM173	483.724	-1.03337	0.138211	-7.47676	7.61759e-14	7.02293e-13
GINS2	1197.96	-1.03325	0.151555	-6.81763	9.25528e-12	7.21864e-11
EDA	99.8004	-1.03229	0.205916	-5.01316	5.35421e-07	2.50091e-06
RGS18	192.453	-1.0321	0.159641	-6.46514	1.01204e-10	7.11072e-10
KLHL17	1544.01	-1.03209	0.126241	-8.17562	2.94352e-16	3.26339e-15
LOC102724002	97.6579	-1.0312	0.226785	-4.54705	5.44035e-06	2.22109e-05
RASD2	122.244	-1.03095	0.240848	-4.28048	1.86495e-05	7.05754e-05
TSTD3	20.1734	-1.02951	0.391125	-2.63218	0.008484	0.0195395
CYB5RL	207.484	-1.02947	0.184171	-5.58974	2.27408e-08	1.24438e-07
TGFA	89.1512	-1.02913	0.267054	-3.85362	0.000116382	0.000388124
ABHD17B	1049.11	-1.02869	0.0916562	-11.2233	3.13279e-29	7.21331e-28
PCYOX1	873.221	-1.02851	0.101879	-10.0953	5.79378e-24	1.03439e-22
ATM	1314.23	-1.02845	0.162009	-6.34812	2.17965e-10	1.4786e-09
CTBP1-AS	84.9374	-1.02787	0.233667	-4.39887	1.08815e-05	4.26809e-05
HAGHL	410.854	-1.02662	0.128691	-7.97741	1.4944e-15	1.57559e-14
ZMYM1	436.523	-1.02635	0.126177	-8.13414	4.14873e-16	4.54718e-15
FTO	547.169	-1.02631	0.154702	-6.63414	3.2639e-11	2.41093e-10
PTK7	1715.53	-1.02559	0.13362	-7.67541	1.64893e-14	1.60606e-13
ZNF575	99.0922	-1.02553	0.206398	-4.96871	6.7399e-07	3.10609e-06
ACO1	1302.29	-1.02398	0.11124	-9.20516	3.41151e-20	4.96176e-19
CEP68	510.239	-1.02393	0.152952	-6.69445	2.16491e-11	1.63212e-10
PQLC2	148.664	-1.02331	0.173357	-5.90287	3.57233e-09	2.13499e-08
PSRC1	504.008	-1.02327	0.165175	-6.19508	5.82546e-10	3.78577e-09
KIAA1107	87.2081	-1.02304	0.246677	-4.14728	3.36443e-05	0.000122332
SENP7	654.721	-1.02281	0.162111	-6.30932	2.80265e-10	1.88236e-09
C6orf89	2456.42	-1.02155	0.0910817	-11.2158	3.41151e-29	7.82549e-28
EXOC4	2036.04	-1.02133	0.14884	-6.86191	6.79446e-12	5.36803e-11
LIX1L	1128.45	-1.02096	0.117344	-8.70061	3.30104e-18	4.1997e-17
HERC2	236.808	-1.01847	0.210866	-4.82997	1.36556e-06	6.0551e-06
TMEM150C	86.0068	-1.01836	0.214712	-4.7429	2.10683e-06	9.06923e-06
EPHA10	169.889	-1.01748	0.188363	-5.4017	6.6014e-08	3.44033e-07
ZBTB25	342.766	-1.01739	0.293914	-3.46153	0.000537119	0.001593
HERPUD2	443.043	-1.0171	0.207951	-4.89105	1.00298e-06	4.51747e-06
HDGFRP2	1998.41	-1.01709	0.0987544	-10.2992	7.1069e-25	1.33671e-23
HSD17B4	1473.83	-1.01679	0.112365	-9.04895	1.44345e-19	2.01906e-18
C5	226.1	-1.01679	0.192558	-5.28041	1.28896e-07	6.5385e-07
SETDB2	360.619	-1.01671	0.133435	-7.61953	2.54602e-14	2.44466e-13
DPH5	343.332	-1.01619	0.13348	-7.61306	2.67673e-14	2.56747e-13
LOC101929747	56.7176	-1.01605	0.266996	-3.80548	0.000141529	0.000465282
PRIMPOL	358.792	-1.01592	0.12246	-8.29591	1.07757e-16	1.2328e-15
TMIE	92.5217	-1.01569	0.340551	-2.9825	0.00285908	0.00734434
PCOLCE	264.906	-1.01562	0.245641	-4.13458	3.55608e-05	0.000128941
WIPF1	806.41	-1.01549	0.111868	-9.07764	1.10958e-19	1.56161e-18
TNRC6B	1096.16	-1.01548	0.182096	-5.57662	2.45237e-08	1.33634e-07
RAVER2	460.232	-1.01532	0.114409	-8.87447	7.02672e-19	9.3974e-18
MDM4	813.915	-1.01491	0.189259	-5.36254	8.20584e-08	4.23185e-07
LOC257396	43.1877	-1.01407	0.34139	-2.97041	0.00297398	0.00760104
LEPREL4	76.434	-1.01385	0.223694	-4.5323	5.83462e-06	2.37199e-05
SHPK	502.932	-1.01339	0.115548	-8.77026	1.78258e-18	2.30965e-17
ENDOD1	1264.41	-1.01331	0.106376	-9.52574	1.6387e-21	2.57377e-20
CRYZL1	418.175	-1.01312	0.136968	-7.39678	1.39528e-13	1.26342e-12
ARMC4	24.5085	-1.01282	0.393222	-2.57569	0.010004	0.0227056
ITGA2B	94.4359	-1.01261	0.368455	-2.74825	0.00599136	0.0143032
CCDC15	214.827	-1.01247	0.192463	-5.26061	1.43578e-07	7.24109e-07
EPHX2	2226.65	-1.01178	0.199431	-5.07337	3.90833e-07	1.85976e-06
PDE1B	489.018	-1.01178	0.166251	-6.08589	1.15843e-09	7.29538e-09
ZBTB4	600.499	-1.0114	0.116846	-8.65579	4.89515e-18	6.12966e-17
PAWR	928.149	-1.01137	0.128894	-7.84655	4.27648e-15	4.39969e-14
GNAL	30.7778	-1.01087	0.34332	-2.94441	0.0032357	0.00819209
TIA1	1775.64	-1.01047	0.0932493	-10.8362	2.31887e-27	4.88404e-26
CIT	1763.37	-1.01046	0.220694	-4.57858	4.68147e-06	1.92546e-05
SLC25A42	424.658	-1.01029	0.126316	-7.99806	1.26391e-15	1.33875e-14
LZTS2	732.698	-1.01	0.171631	-5.8847	3.98775e-09	2.37318e-08
PKD1	2266.07	-1.00884	0.116008	-8.69633	3.428e-18	4.35818e-17
TRNE	603.402	-1.00863	0.167924	-6.00647	1.89607e-09	1.17029e-08
ROPN1L	45.4395	-1.00822	0.325449	-3.09793	0.00194876	0.00517461
H2AFY2	31.6342	-1.00785	0.358966	-2.80765	0.00499049	0.0121099
FAM198A	37.4383	-1.00784	0.334492	-3.01305	0.00258633	0.00670685
JAG2	481.468	-1.00762	0.195258	-5.16047	2.46332e-07	1.20188e-06
CAMKMT	100.749	-1.00721	0.216557	-4.65099	3.30342e-06	1.38612e-05
CDC42BPB	96.9221	-1.00708	0.217261	-4.63535	3.5634e-06	1.48973e-05
TMEM143	282.577	-1.00589	0.157801	-6.37442	1.83662e-10	1.25757e-09
MPP2	500.996	-1.00588	0.121016	-8.31192	9.41684e-17	1.08344e-15
PDK2	371.681	-1.00567	0.131452	-7.65043	2.00313e-14	1.93763e-13
BTBD8	18.9776	-1.00538	0.416665	-2.41291	0.0158255	0.034082
CNPY4	111.262	-1.00493	0.205238	-4.8964	9.76087e-07	4.40287e-06
ZCCHC7	704.601	-1.00447	0.150765	-6.6625	2.69207e-11	2.01047e-10
TRIM66	558.954	-1.00402	0.151336	-6.63436	3.25908e-11	2.40835e-10
CMPK2	379.657	-1.00399	0.156509	-6.41493	1.40892e-10	9.7864e-10
LOC101929638	128.365	-1.00399	0.238488	-4.2098	2.55591e-05	9.47046e-05
WHAMMP1	41.3469	-1.00385	0.311636	-3.22124	0.00127638	0.00353343
MAST1	316.05	-1.00382	0.175073	-5.7337	9.82611e-09	5.60677e-08
TKTL1	39.2253	-1.00239	0.299683	-3.34486	0.000823253	0.00235499
XPO1	5569.44	-1.00207	0.105167	-9.52832	1.59842e-21	2.51267e-20
RNPEP	1073.13	-1.00003	0.128417	-7.78741	6.8395e-15	6.89684e-14
ZDHHC24	310.351	-0.999254	0.154161	-6.48188	9.05855e-11	6.39168e-10
MUT	877.344	-0.998332	0.12358	-8.07841	6.56184e-16	7.07332e-15
LOC102606465	67.9147	-0.998085	0.292022	-3.41784	0.000631209	0.00184371
CDKN1B	1296.24	-0.997201	0.235062	-4.2423	2.21245e-05	8.27496e-05
MDM1	584.178	-0.996807	0.122562	-8.13307	4.18565e-16	4.5849e-15
C6orf226	61.5648	-0.996301	0.25413	-3.92043	8.83911e-05	0.000301318
C16orf89	32.6151	-0.996257	0.33094	-3.01039	0.00260913	0.00676118
SLC30A3	183.102	-0.995418	0.221302	-4.49801	6.85926e-06	2.75788e-05
ARNTL	419.861	-0.995238	0.180531	-5.51283	3.53105e-08	1.89588e-07
TTYH2	176.583	-0.994816	0.203363	-4.89183	9.99028e-07	4.5008e-06
MAP2K5	558.108	-0.994418	0.135321	-7.34857	2.00343e-13	1.79367e-12
LACTB	1032.26	-0.994027	0.116484	-8.5336	1.41869e-17	1.7314e-16
SLC25A23	1030.11	-0.993462	0.123626	-8.03606	9.27726e-16	9.90694e-15
NR2C2	1628.4	-0.993261	0.143909	-6.902	5.12766e-12	4.08648e-11
CPOX	798.372	-0.991337	0.105228	-9.42083	4.47518e-21	6.86946e-20
LOC441242	28.6803	-0.99131	0.38211	-2.5943	0.00947828	0.0216413
AGTRAP	329.301	-0.99112	0.148254	-6.6853	2.30447e-11	1.73233e-10
AUH	268.493	-0.990679	0.151805	-6.526	6.75513e-11	4.82034e-10
IZUMO4	273.543	-0.990577	0.294636	-3.36203	0.000773709	0.0022244
NARF	2506.45	-0.99043	0.168721	-5.87022	4.35205e-09	2.58409e-08
H1FX	5873.61	-0.990248	0.157525	-6.28628	3.25171e-10	2.16805e-09
BCHE	336.58	-0.990141	0.130248	-7.60195	2.9171e-14	2.78633e-13
CSRP2BP	407.062	-0.990083	0.16182	-6.11841	9.45151e-10	6.01855e-09
SUFU	392.733	-0.989716	0.126322	-7.8349	4.69223e-15	4.81118e-14
MAST2	1025.98	-0.989569	0.176522	-5.60593	2.07143e-08	1.14032e-07
ACP6	39.696	-0.989298	0.333586	-2.96564	0.0030205	0.00770486
ACAA1	955.46	-0.988978	0.154066	-6.41918	1.37012e-10	9.52416e-10
MCCC1	712.498	-0.988917	0.128731	-7.68204	1.56576e-14	1.52831e-13
LETMD1	665.796	-0.987769	0.211631	-4.66741	3.05016e-06	1.28724e-05
AP2A2-2	42.6654	-0.987486	0.3074	-3.21238	0.00131639	0.00362825
SLC38A3	36.8754	-0.986726	0.415246	-2.37624	0.01749	0.0372976
STK16	472.951	-0.986371	0.128799	-7.6582	1.88555e-14	1.82776e-13
ACSF2	594.535	-0.986065	0.175035	-5.63353	1.76559e-08	9.81109e-08
RELL2	328.86	-0.986032	0.139643	-7.06108	1.65209e-12	1.37289e-11
CDK5RAP3	3807.69	-0.985958	0.189506	-5.20279	1.96323e-07	9.70047e-07
MSL2	1920.96	-0.984405	0.110101	-8.9409	3.86014e-19	5.27831e-18
C14orf64	146.971	-0.983685	0.206194	-4.77069	1.83599e-06	7.97849e-06
FHDC1	111.614	-0.983226	0.197406	-4.98073	6.33456e-07	2.92741e-06
CEP44	597.878	-0.983182	0.216541	-4.5404	5.6148e-06	2.28669e-05
HAUS4	1459.98	-0.983105	0.15717	-6.25505	3.97389e-10	2.62561e-09
FGF9	212.011	-0.982903	0.147835	-6.64866	2.9577e-11	2.20076e-10
GPR133	192.083	-0.982448	0.236745	-4.14981	3.32749e-05	0.000121158
FBLN2	4240.7	-0.98076	0.0969317	-10.1181	4.5943e-24	8.28334e-23
ROGDI	162.145	-0.980323	0.189567	-5.17138	2.32366e-07	1.13647e-06
DUSP15	60.3691	-0.97986	0.261963	-3.74046	0.000183683	0.000593513
IRF2	558.057	-0.978985	0.147855	-6.62125	3.56178e-11	2.61722e-10
PPFIBP2	155.548	-0.978902	0.194903	-5.02251	5.09994e-07	2.38702e-06
PCNXL2	260.494	-0.977434	0.154478	-6.32735	2.49414e-10	1.68382e-09
ZNF138	358.032	-0.976918	0.171224	-5.70549	1.16009e-08	6.54997e-08
PRAME-2	187.79	-0.976644	0.160188	-6.09685	1.08181e-09	6.85534e-09
CECR5	1640.45	-0.976464	0.107063	-9.12045	7.48134e-20	1.06439e-18
TBC1D10C	935.82	-0.975414	0.132988	-7.33462	2.2235e-13	1.98293e-12
MTCP1	74.6637	-0.975188	0.230385	-4.23286	2.30741e-05	8.60901e-05
LOC102723726	30.4602	-0.975169	0.415473	-2.34713	0.0189187	0.039962
KATNAL1	383.951	-0.97496	0.138768	-7.02584	2.12776e-12	1.7483e-11
ANXA6	5395.1	-0.974937	0.0977307	-9.97576	1.94614e-23	3.40799e-22
RADIL	128.12	-0.974183	0.195686	-4.97829	6.41495e-07	2.96082e-06
PIGS	1001.68	-0.973378	0.0987363	-9.85835	6.30754e-23	1.07269e-21
ARHGAP32	466.3	-0.971997	0.173172	-5.6129	1.98969e-08	1.09829e-07
TTLL7	132.567	-0.971097	0.21523	-4.5119	6.42482e-06	2.60152e-05
KLF13	74.6454	-0.970777	0.231632	-4.19103	2.77696e-05	0.000102211
HEXIM2	125.323	-0.970313	0.221874	-4.37327	1.22402e-05	4.77538e-05
CEMP1	77.9024	-0.970074	0.328055	-2.95705	0.00310602	0.00790206
CDAN1	1054.68	-0.968541	0.141295	-6.85472	7.14536e-12	5.62824e-11
PLAG1	416.621	-0.967708	0.270118	-3.58254	0.000340266	0.00104691
SLC25A1	2121.7	-0.967645	0.148622	-6.5108	7.47516e-11	5.30722e-10
MFNG	1092.28	-0.967451	0.168988	-5.72498	1.03444e-08	5.88232e-08
TRIQK	425.023	-0.967203	0.171947	-5.625	1.85509e-08	1.02803e-07
HDAC9	76.7496	-0.966777	0.251816	-3.83922	0.000123425	0.000410339
SPOCK2	203.8	-0.966204	0.208004	-4.64513	3.3987e-06	1.42381e-05
PDE5A	137.238	-0.965922	0.277624	-3.47924	0.000502833	0.00149988
TACC3	3086.68	-0.965551	0.118957	-8.11684	4.78487e-16	5.21939e-15
LEPREL2	433.052	-0.965527	0.204369	-4.72443	2.30767e-06	9.8753e-06
SLC46A3	286.607	-0.965249	0.165889	-5.81863	5.93308e-09	3.47322e-08
TNK2	483.893	-0.965035	0.188039	-5.13209	2.86545e-07	1.38698e-06
CCDC136	422.205	-0.964955	0.14682	-6.57235	4.95283e-11	3.58179e-10
IDH1	727.939	-0.964857	0.133641	-7.21979	5.20683e-13	4.51571e-12
GLI1	91.5889	-0.964638	0.221474	-4.35554	1.32738e-05	5.14787e-05
INVS	191.672	-0.963603	0.162822	-5.91815	3.25582e-09	1.95606e-08
MSH6	1808.04	-0.963515	0.145674	-6.6142	3.73554e-11	2.7372e-10
POLG2	310.88	-0.961201	0.150594	-6.38273	1.73953e-10	1.19332e-09
CCDC74A	562.198	-0.960699	0.13502	-7.11522	1.11738e-12	9.45514e-12
HMGCL	638.013	-0.960611	0.156531	-6.13685	8.41719e-10	5.3843e-09
CYP2U1	195.382	-0.960517	0.171852	-5.58922	2.28088e-08	1.24773e-07
NCOR1	4162.26	-0.960454	0.124921	-7.68851	1.48863e-14	1.45925e-13
SAMD1	1350.71	-0.960014	0.10954	-8.76407	1.88319e-18	2.43655e-17
CDKN2C	2500.15	-0.959838	0.118669	-8.08839	6.04576e-16	6.53242e-15
EEFSEC	395.835	-0.959759	0.148066	-6.48197	9.05356e-11	6.39063e-10
STAM	695.254	-0.958859	0.14023	-6.83776	8.04395e-12	6.30615e-11
OTX1	114.121	-0.958515	0.249864	-3.83614	0.000124984	0.000415221
RP11-85F14.5	38.567	-0.957987	0.32566	-2.94168	0.00326435	0.0082589
ARHGEF39	294.587	-0.95762	0.172143	-5.56294	2.6526e-08	1.43902e-07
CTC-338M12.4	46.4413	-0.956986	0.404074	-2.36834	0.017868	0.0380307
SHANK1	573.396	-0.956945	0.155132	-6.1686	6.8898e-10	4.44301e-09
ELMO1	1059.83	-0.956862	0.134133	-7.1337	9.7705e-13	8.3081e-12
GMDS	721.57	-0.956731	0.119701	-7.99269	1.32023e-15	1.39597e-14
KLHDC3	1154.92	-0.956607	0.0980075	-9.76055	1.66248e-22	2.76556e-21
FOXB1	44.2194	-0.956556	0.364877	-2.62158	0.00875223	0.0201091
WASF3	58.1441	-0.95624	0.320862	-2.98022	0.0028804	0.00739184
LOC100506870	21.0368	-0.956034	0.394169	-2.42544	0.0152898	0.033096
FAM184B	61.8998	-0.955862	0.321108	-2.97676	0.00291312	0.00746638
LRRC39	24.3867	-0.955406	0.386216	-2.47376	0.0133698	0.0294207
DMXL2	1555.37	-0.955225	0.135337	-7.05812	1.68765e-12	1.40116e-11
SLC4A7	1623.87	-0.955084	0.201177	-4.74747	2.05979e-06	8.88349e-06
AGO4	748.553	-0.954946	0.130314	-7.32806	2.33513e-13	2.07943e-12
ZNF831	62.3816	-0.954005	0.291146	-3.27672	0.00105019	0.00295195
RALBP1	1749.5	-0.952416	0.0949742	-10.0282	1.14641e-23	2.01914e-22
MYH10	3345.88	-0.95185	0.127219	-7.48196	7.32229e-14	6.76433e-13
FAM216A	540.11	-0.951774	0.145572	-6.53815	6.22827e-11	4.45831e-10
C2orf68	617.034	-0.950981	0.126162	-7.53775	4.78151e-14	4.49437e-13
SMAD2	2986.71	-0.950739	0.0839712	-11.3222	1.01891e-29	2.41919e-28
RBPJ	3533.8	-0.95056	0.2117	-4.49013	7.11785e-06	2.85495e-05
PPP1R12B	434.237	-0.950385	0.185716	-5.11742	3.0975e-07	1.49007e-06
ANKRD20A19P	95.1279	-0.950292	0.253179	-3.75345	0.00017442	0.000565581
CDADC1	214.003	-0.950083	0.145732	-6.51937	7.06048e-11	5.03039e-10
TSPAN7	6907.57	-0.950041	0.101429	-9.36654	7.49458e-21	1.13706e-19
NGLY1	1907.23	-0.949837	0.150066	-6.32947	2.46004e-10	1.66203e-09
CBX3P2	23.9619	-0.949253	0.387518	-2.44957	0.0143027	0.0312217
HNRNPLL	910.78	-0.949197	0.120054	-7.90642	2.64896e-15	2.75787e-14
LOC102724164	145.128	-0.948966	0.31525	-3.01021	0.00261071	0.00676432
HCFC1	5043.8	-0.948603	0.116094	-8.17102	3.0578e-16	3.38394e-15
MTIF3	473.132	-0.948331	0.120475	-7.87162	3.5009e-15	3.6099e-14
SPECC1	118.848	-0.9482	0.192866	-4.91638	8.81612e-07	4.00339e-06
FKBP5	858.813	-0.947605	0.14646	-6.47005	9.79718e-11	6.89688e-10
CCNG2	825.104	-0.946346	0.292675	-3.23344	0.0012231	0.00339674
CCDC51	311.35	-0.945922	0.162992	-5.80347	6.49545e-09	3.78667e-08
SS18L1	640.213	-0.945542	0.140232	-6.7427	1.55465e-11	1.18475e-10
PLCG2	546.883	-0.945362	0.128514	-7.35611	1.89342e-13	1.70017e-12
LOC102724466	24.316	-0.945089	0.368877	-2.56207	0.0104051	0.0235035
TMPO-AS1	253.806	-0.94481	0.137792	-6.85681	7.04176e-12	5.55381e-11
EFEMP1	842.854	-0.943904	0.123869	-7.62017	2.53351e-14	2.43393e-13
CHD6	1134.32	-0.943777	0.17294	-5.45724	4.83586e-08	2.55739e-07
DUS2	528.157	-0.943721	0.110109	-8.57077	1.028e-17	1.26388e-16
MAP4K1	1402.04	-0.943287	0.102114	-9.23762	2.52032e-20	3.69996e-19
TCEA2	591.233	-0.94297	0.127787	-7.37925	1.59185e-13	1.43502e-12
PNMA3	228.89	-0.942881	0.240756	-3.91634	8.99044e-05	0.000306134
SNTB1	207.087	-0.942443	0.200076	-4.71042	2.47204e-06	1.05273e-05
SNX24	266.023	-0.94241	0.140753	-6.69548	2.14961e-11	1.62192e-10
HPGD	757.484	-0.942299	0.112508	-8.37538	5.50442e-17	6.46318e-16
CDK5RAP2	3161.96	-0.941768	0.12373	-7.61147	2.70998e-14	2.59528e-13
ARHGAP33	1373.93	-0.941563	0.211354	-4.4549	8.39312e-06	3.33065e-05
NECAB3	270.383	-0.940954	0.18327	-5.13424	2.83294e-07	1.37306e-06
PMM1	653.999	-0.94078	0.140842	-6.67967	2.39476e-11	1.7943e-10
KLHDC2	641.385	-0.940734	0.110437	-8.51832	1.61882e-17	1.96908e-16
ZNF580	449.335	-0.940526	0.126359	-7.4433	9.82013e-14	8.98107e-13
STX16	1427.99	-0.940337	0.185717	-5.06327	4.12115e-07	1.95239e-06
ARHGAP4	1962.67	-0.940184	0.0955097	-9.84385	7.28645e-23	1.23475e-21
MSH3	604.041	-0.939586	0.120888	-7.77237	7.70294e-15	7.73015e-14
FOXD2	172.742	-0.939446	0.251567	-3.73438	0.000188175	0.00060674
SLC25A36	1541.47	-0.939299	0.167186	-5.61829	1.92854e-08	1.067e-07
STUB1	825.288	-0.939201	0.133407	-7.04012	1.92071e-12	1.58817e-11
LOC101927974	31.2658	-0.93885	0.396952	-2.36515	0.0180229	0.0383016
CBR4	674.084	-0.938076	0.112506	-8.33798	7.55683e-17	8.76612e-16
MPZL1	1260.92	-0.937964	0.0930244	-10.083	6.56941e-24	1.17173e-22
ENKD1	233.802	-0.936764	0.162633	-5.75998	8.41252e-09	4.83337e-08
KIAA1324L	399.782	-0.936504	0.179066	-5.22994	1.69565e-07	8.45373e-07
LCAT	119.842	-0.936049	0.212571	-4.40346	1.06536e-05	4.18496e-05
UBOX5	150.725	-0.935568	0.189764	-4.93016	8.21638e-07	3.74687e-06
LOC101059954	86.1713	-0.935506	0.31496	-2.97024	0.0029757	0.00760332
HDAC4	2053.98	-0.93537	0.119837	-7.80537	5.93262e-15	6.01605e-14
LYRM7	482.276	-0.935267	0.146924	-6.36566	1.9445e-10	1.32696e-09
BAP1	3662.98	-0.935023	0.101268	-9.23317	2.62744e-20	3.85203e-19
ANKRD50	615.216	-0.934709	0.173532	-5.38639	7.18866e-08	3.72937e-07
PAQR7	117.055	-0.934333	0.197593	-4.72858	2.26093e-06	9.69605e-06
NUP210	6979.22	-0.933948	0.129822	-7.19409	6.2877e-13	5.41714e-12
KIAA1161	214.049	-0.933509	0.157418	-5.93013	3.02698e-09	1.82638e-08
KCNJ10	79.4505	-0.933099	0.286069	-3.2618	0.00110707	0.00309806
RPS6KA2	113.944	-0.932857	0.207056	-4.50534	6.62664e-06	2.67553e-05
RANBP10	902.895	-0.931166	0.10161	-9.16408	4.99717e-20	7.19924e-19
LOC646719	198.603	-0.931141	0.226494	-4.11111	3.9376e-05	0.000141623
FSD1	150.917	-0.930507	0.199868	-4.65561	3.23025e-06	1.35822e-05
CREBRF	213.864	-0.930158	0.363429	-2.5594	0.0104854	0.0236543
USP30	463.611	-0.930016	0.141437	-6.57549	4.84918e-11	3.50961e-10
PAK6	64.6698	-0.929891	0.247244	-3.76103	0.000169215	0.000549863
SCART1	136.686	-0.92976	0.323147	-2.8772	0.00401221	0.00994862
HSD17B6	119.879	-0.929497	0.211333	-4.39826	1.09124e-05	4.27928e-05
SMARCA4	8242.56	-0.929407	0.0920419	-10.0976	5.65826e-24	1.01119e-22
POLI	286.519	-0.929314	0.161288	-5.76181	8.3216e-09	4.78564e-08
BCKDK	747.709	-0.928038	0.142597	-6.5081	7.61053e-11	5.39914e-10
TMEM79	267.052	-0.927974	0.182204	-5.09305	3.52341e-07	1.68493e-06
PTCH1	102.003	-0.927501	0.25168	-3.68524	0.00022849	0.000724842
SESTD1	1077.49	-0.927457	0.201089	-4.61217	3.98494e-06	1.65424e-05
FAM134B	587.196	-0.927046	0.112708	-8.22517	1.94907e-16	2.18741e-15
C10orf107	25.5291	-0.927033	0.389915	-2.37752	0.0174293	0.0371943
TRIM8	1653.02	-0.926746	0.100138	-9.25472	2.14792e-20	3.1668e-19
KIF21B	2302.85	-0.926205	0.111263	-8.3245	8.46847e-17	9.7802e-16
GOLGA2P5	363.087	-0.925903	0.204625	-4.52489	6.04283e-06	2.45446e-05
SPAG16	175.457	-0.92579	0.191877	-4.82492	1.40061e-06	6.203e-06
HDAC7	1807.53	-0.92505	0.229124	-4.03734	5.40609e-05	0.000190836
SLC16A7	901.703	-0.923344	0.121025	-7.62938	2.35885e-14	2.27091e-13
ZNF217	2017.16	-0.922961	0.136778	-6.74789	1.50015e-11	1.14656e-10
CELSR2	670.862	-0.922806	0.159293	-5.79315	6.90779e-09	4.01424e-08
TJP3	124.198	-0.922597	0.307169	-3.00355	0.00266852	0.00689845
VSIG10	218.48	-0.922509	0.156179	-5.90673	3.48965e-09	2.08831e-08
SLC25A40	1066.73	-0.922285	0.14784	-6.23842	4.42018e-10	2.90891e-09
FUK	226.736	-0.922274	0.156211	-5.90405	3.54691e-09	2.12118e-08
PDK3	795.746	-0.921538	0.218725	-4.21322	2.51753e-05	9.33392e-05
MMS22L	1359.28	-0.920703	0.141156	-6.5226	6.90989e-11	4.92693e-10
SSSCA1-AS1	47.5759	-0.920578	0.315857	-2.91454	0.0035621	0.00893064
NCALD	47.4793	-0.920419	0.378243	-2.43341	0.0149574	0.0324725
AMDHD2	263.889	-0.919758	0.186975	-4.91914	8.69234e-07	3.94914e-06
FANCM	485.02	-0.919658	0.134125	-6.85673	7.04556e-12	5.55442e-11
SUCLG2	869.802	-0.91955	0.1112	-8.26931	1.34737e-16	1.53017e-15
KLC4	419.176	-0.918189	0.218546	-4.20135	2.65326e-05	9.79574e-05
ZNF654	840.11	-0.91716	0.229213	-4.00134	6.29842e-05	0.000220378
HDAC11	106.227	-0.91712	0.206874	-4.43324	9.28268e-06	3.66852e-05
LOC100130872	464.528	-0.916839	0.226551	-4.04694	5.18921e-05	0.00018357
HERC3	742.125	-0.916366	0.215534	-4.25161	2.12241e-05	7.96591e-05
NNT	2172.29	-0.915976	0.0864109	-10.6002	2.97234e-26	5.93883e-25
KATNB1	749.592	-0.915783	0.134401	-6.8138	9.50535e-12	7.40421e-11
TRADD	320.19	-0.915596	0.139168	-6.57908	4.73357e-11	3.43273e-10
ST6GALNAC4	165.998	-0.915262	0.180794	-5.06245	4.13907e-07	1.95936e-06
L2HGDH	579.309	-0.914773	0.126034	-7.25816	3.92378e-13	3.44216e-12
MAGI3	338.511	-0.914032	0.14803	-6.17464	6.63145e-10	4.28699e-09
STK36	311.203	-0.913528	0.186284	-4.90396	9.39259e-07	4.24722e-06
TMEM178B	45.8614	-0.912915	0.324474	-2.81352	0.00490022	0.0119273
TMED8	1990.19	-0.91262	0.102553	-8.89904	5.63314e-19	7.58359e-18
PRPF40B	234.667	-0.91262	0.151814	-6.01145	1.83873e-09	1.13661e-08
RALGAPA2	923.271	-0.91257	0.109276	-8.35102	6.76733e-17	7.8853e-16
OR7E14P	41.363	-0.912346	0.332088	-2.7473	0.00600882	0.0143393
MAZ	10049.3	-0.911327	0.0925588	-9.84592	7.13833e-23	1.21173e-21
FAM173A	419.865	-0.911153	0.122436	-7.44188	9.9265e-14	9.07381e-13
DHTKD1	675.406	-0.910911	0.133898	-6.80302	1.0245e-11	7.96338e-11
ACADS	732.104	-0.910417	0.108259	-8.4096	4.11428e-17	4.85586e-16
COQ5	617.234	-0.91028	0.114211	-7.97015	1.58483e-15	1.66804e-14
METTL3	761.215	-0.910175	0.118358	-7.69003	1.47105e-14	1.4428e-13
ZNF462	498.486	-0.909548	0.172311	-5.27854	1.30217e-07	6.6037e-07
NAPB	434.518	-0.90932	0.198852	-4.57286	4.81113e-06	1.97701e-05
ALDH3A2	683.687	-0.908991	0.146133	-6.2203	4.96216e-10	3.2469e-09
ADAMTS10	229.362	-0.908883	0.218803	-4.15389	3.26876e-05	0.000119179
ACD	1209.87	-0.908194	0.117693	-7.71663	1.19445e-14	1.18037e-13
PHKB	1668.19	-0.908081	0.105515	-8.60622	7.55113e-18	9.34663e-17
TTC21A	52.0724	-0.907977	0.292575	-3.1034	0.00191309	0.00508861
MCM4	7946.4	-0.907941	0.0952604	-9.53115	1.55551e-21	2.45154e-20
TBC1D2B	1478.36	-0.906214	0.128968	-7.02668	2.11499e-12	1.73859e-11
PLEKHA2	1935.36	-0.905937	0.214711	-4.21933	2.45027e-05	9.10483e-05
PFKL	3668.15	-0.905079	0.162736	-5.56163	2.67259e-08	1.44814e-07
XRCC1	1356.05	-0.904855	0.126684	-7.14259	9.15897e-13	7.80626e-12
ZNF519	279.683	-0.904747	0.195689	-4.62338	3.77528e-06	1.57292e-05
DENND1A	1044.1	-0.904071	0.110224	-8.20214	2.36139e-16	2.63237e-15
CRYL1	388.947	-0.903833	0.178527	-5.06272	4.13322e-07	1.9571e-06
ASB14	26.8524	-0.903782	0.360196	-2.50914	0.0121025	0.0269072
RNF113A	472.323	-0.903343	0.219647	-4.11271	3.91049e-05	0.000140732
NUDT22	565.315	-0.903246	0.108958	-8.28988	1.13358e-16	1.29526e-15
CCP110	2653.12	-0.903171	0.128232	-7.04325	1.87801e-12	1.55427e-11
HOOK2	307.73	-0.903078	0.138925	-6.50049	8.00595e-11	5.66646e-10
CKLF-CMTM1	41.2121	-0.902831	0.293266	-3.07854	0.00208019	0.0054933
C21orf119	127.03	-0.902765	0.202047	-4.46809	7.89228e-06	3.14418e-05
KIAA2022	277.391	-0.90253	0.217511	-4.14934	3.3343e-05	0.000121381
ACSS2	345.872	-0.90252	0.294863	-3.06081	0.00220741	0.00580075
ZNF445	999.862	-0.902276	0.17575	-5.13385	2.83873e-07	1.3751e-06
CENPP	214.19	-0.902036	0.164821	-5.47283	4.42917e-08	2.35048e-07
NUDCD3	974.529	-0.901865	0.0971125	-9.2868	1.58997e-20	2.36323e-19
OCEL1	125.435	-0.901778	0.189691	-4.75393	1.99503e-06	8.6225e-06
CDH4	428.602	-0.900638	0.142955	-6.30015	2.97365e-10	1.99209e-09
TLE6	83.7523	-0.900284	0.286269	-3.14489	0.00166148	0.00447485
WIPI1	53.3451	-0.898993	0.355907	-2.52592	0.0115395	0.0257808
CASC15	130.242	-0.898942	0.191151	-4.70279	2.56628e-06	1.09109e-05
PLXNB1	819.234	-0.898841	0.15516	-5.79298	6.91491e-09	4.01711e-08
CCDC88A	4090.42	-0.898638	0.0847318	-10.6057	2.80413e-26	5.61503e-25
CNOT6L	1368.76	-0.898226	0.173768	-5.16912	2.35197e-07	1.14878e-06
GLG1	3967.93	-0.898098	0.099542	-9.0223	1.84177e-19	2.56055e-18
PTGES2	865.477	-0.897735	0.155534	-5.77195	7.8358e-09	4.52334e-08
MIEF2	255.102	-0.897697	0.176878	-5.07524	3.87005e-07	1.84299e-06
PLEKHO1	1115.17	-0.897504	0.150855	-5.94946	2.69036e-09	1.63406e-08
NXPH4	97.4489	-0.896736	0.285518	-3.14074	0.00168523	0.00453345
HPS3	720.902	-0.896572	0.120135	-7.46307	8.4531e-14	7.76581e-13
ZNF322	91.9902	-0.895953	0.235139	-3.81031	0.000138795	0.000457001
SMPD3	64.4923	-0.895633	0.300804	-2.97747	0.0029064	0.00745178
ADK	418.702	-0.895239	0.177133	-5.05404	4.32561e-07	2.04132e-06
ALKBH5	2340.45	-0.894957	0.174491	-5.12896	2.91353e-07	1.40764e-06
DENND1C	839.762	-0.894938	0.123602	-7.24051	4.47013e-13	3.90086e-12
SLC52A1	82.2492	-0.894484	0.242964	-3.68154	0.000231828	0.00073429
HERC2-2	29.7827	-0.893915	0.381254	-2.34467	0.0190438	0.0401928
B3GNT4	73.0408	-0.893833	0.306175	-2.91935	0.00350762	0.00880614
TNFSF13B	78.3889	-0.892914	0.294837	-3.0285	0.00245769	0.00639502
C22orf29	1060.64	-0.892879	0.136742	-6.52966	6.59172e-11	4.71294e-10
AP2A2-3	29.95	-0.892264	0.343995	-2.59383	0.00949143	0.021664
FAM210B	340.984	-0.891633	0.147872	-6.02975	1.64212e-09	1.01939e-08
CALHM2	170.733	-0.891135	0.168019	-5.30378	1.13429e-07	5.77795e-07
FAM219B	267.488	-0.891129	0.171298	-5.2022	1.96943e-07	9.72587e-07
KIAA1024	203.037	-0.890337	0.185533	-4.79881	1.59607e-06	7.00923e-06
CAPN10-AS1	87.7006	-0.890231	0.27628	-3.22221	0.00127206	0.00352202
BCAS3	205.779	-0.88974	0.254701	-3.49327	0.000477135	0.00142789
LRBA	1460.34	-0.888776	0.134156	-6.62495	3.47374e-11	2.55664e-10
HRASLS5	91.5845	-0.88819	0.210722	-4.21498	2.49805e-05	9.26921e-05
GSE1	5802.2	-0.887385	0.124606	-7.12155	1.0672e-12	9.05362e-12
NDRG3	1045.85	-0.88696	0.101119	-8.77145	1.76386e-18	2.28864e-17
ARVCF	251.105	-0.886893	0.170958	-5.18779	2.12802e-07	1.04552e-06
RAD51B	219.557	-0.885931	0.197826	-4.47832	7.5232e-06	3.00238e-05
SEPW1	1366.23	-0.88525	0.107723	-8.21787	2.07146e-16	2.31623e-15
TCFL5	533.547	-0.885108	0.145354	-6.08931	1.134e-09	7.15876e-09
TAZ	809.401	-0.885029	0.116815	-7.5763	3.55548e-14	3.37493e-13
LINC00984	913.52	-0.884981	0.146184	-6.05389	1.41391e-09	8.81922e-09
HK1	2423.43	-0.88434	0.177123	-4.9928	5.95098e-07	2.76131e-06
STAU2	1747.17	-0.883902	0.0895866	-9.86644	5.81908e-23	9.93319e-22
ABHD4	452.663	-0.883857	0.155522	-5.68317	1.3222e-08	7.42625e-08
AGTPBP1	491.156	-0.883559	0.155836	-5.6698	1.42966e-08	8.00278e-08
CMC4	276.878	-0.883261	0.161084	-5.48324	4.17604e-08	2.22454e-07
LOC101929112	21.1182	-0.883231	0.388365	-2.27423	0.0229523	0.0473604
LOC644656	27.0091	-0.883198	0.349774	-2.52505	0.0115682	0.0258386
EPG5	907.123	-0.882005	0.197835	-4.45828	8.26196e-06	3.28216e-05
GPC2	232.315	-0.881719	0.215807	-4.08569	4.39465e-05	0.000157073
ZDHHC23	748.71	-0.881155	0.13698	-6.4327	1.25354e-10	8.74367e-10
UBAC2	762.529	-0.880892	0.119283	-7.3849	1.52566e-13	1.37807e-12
PASK	1399.36	-0.88067	0.111843	-7.87416	3.43049e-15	3.54129e-14
XYLT2	474.764	-0.880313	0.153367	-5.73992	9.47205e-09	5.41827e-08
LOC100506548	472.954	-0.879068	0.211	-4.16619	3.09729e-05	0.000113431
FAM86C2P	87.1583	-0.878864	0.275307	-3.1923	0.00141142	0.00386398
DNASE2	548.784	-0.878755	0.112688	-7.7981	6.28485e-15	6.36211e-14
TMEM101	611.404	-0.877672	0.123452	-7.10944	1.16518e-12	9.82101e-12
GALK2	492.466	-0.876717	0.128349	-6.83072	8.44915e-12	6.60964e-11
CHRDL1	67.2876	-0.876307	0.232821	-3.76387	0.000167307	0.000544351
LMO4	561.744	-0.876272	0.117256	-7.47318	7.82794e-14	7.21322e-13
IQSEC1	302.038	-0.876018	0.184308	-4.75301	2.00413e-06	8.65976e-06
LINC00883	75.1459	-0.875649	0.255019	-3.43366	0.000595493	0.00174776
PRICKLE4	127.339	-0.875602	0.211965	-4.13089	3.61367e-05	0.000130744
NREP	640.892	-0.875507	0.113448	-7.71726	1.18858e-14	1.17521e-13
RP11-425I13.3	49.5758	-0.875442	0.323872	-2.70305	0.00687061	0.0161471
SYCP2	2258.28	-0.875427	0.124476	-7.0329	2.02277e-12	1.66578e-11
RNF144A	654.199	-0.875364	0.166763	-5.24915	1.52804e-07	7.66201e-07
TMEM44	343.433	-0.875196	0.177949	-4.91825	8.7323e-07	3.96631e-06
MYCBP2	2046.53	-0.874754	0.174039	-5.02618	5.00341e-07	2.34424e-06
DEDD2	602.372	-0.874235	0.145841	-5.99445	2.04169e-09	1.25677e-08
OPN3	188.577	-0.873887	0.184413	-4.73876	2.15033e-06	9.24778e-06
PITPNA-AS1	102.081	-0.873794	0.253996	-3.44019	0.000581297	0.00171132
ATRX	1851.88	-0.873715	0.1315	-6.6442	3.04867e-11	2.26017e-10
ZNF318	1411.73	-0.873361	0.177288	-4.92621	8.38388e-07	3.81849e-06
PCYOX1L	565.279	-0.873156	0.115141	-7.58333	3.36789e-14	3.20519e-13
MPI	385.424	-0.872856	0.150133	-5.81388	6.10422e-09	3.56997e-08
EPOR	231.29	-0.872674	0.196885	-4.4324	9.31918e-06	3.68215e-05
MMS19	1762.31	-0.871931	0.12182	-7.15757	8.21214e-13	7.0189e-12
ERAP2	766.071	-0.871764	0.117412	-7.42482	1.12935e-13	1.02976e-12
HIP1	231.93	-0.871419	0.16568	-5.25965	1.44332e-07	7.27511e-07
RPA1	4988.06	-0.871361	0.0808516	-10.7773	4.40669e-27	9.13414e-26
PLEKHG5	186.092	-0.870986	0.269547	-3.2313	0.0012323	0.00342021
SMARCAL1	612.259	-0.870554	0.131165	-6.63708	3.1996e-11	2.36727e-10
RSBN1	972.15	-0.870378	0.245907	-3.53945	0.000400955	0.00121765
MBNL3	1108.95	-0.870364	0.114694	-7.58857	3.23453e-14	3.08148e-13
ITPR2	1212.61	-0.86949	0.126238	-6.88771	5.66992e-12	4.49707e-11
LOC100630923	38.8836	-0.869453	0.377444	-2.30353	0.0212493	0.0442813
CHN1	374.354	-0.869342	0.157771	-5.51015	3.58525e-08	1.92328e-07
ANO10	323.536	-0.86884	0.140829	-6.16946	6.85242e-10	4.42046e-09
TMEM42	159.232	-0.86855	0.196439	-4.42146	9.8034e-06	3.86346e-05
EPN1	1805.66	-0.867915	0.090877	-9.55043	1.2916e-21	2.0551e-20
BCKDHA	1331.73	-0.867885	0.241925	-3.58741	0.000333976	0.00102912
ZNF219	508.583	-0.867838	0.132079	-6.57058	5.01187e-11	3.62305e-10
TMEM25	204.461	-0.867824	0.156474	-5.54614	2.92043e-08	1.57869e-07
MCM2	4789.41	-0.867275	0.0998201	-8.68839	3.67619e-18	4.65752e-17
C11orf49	428.931	-0.866373	0.138374	-6.2611	3.82263e-10	2.53207e-09
RAB3IL1	82.7244	-0.866116	0.213819	-4.0507	5.1065e-05	0.000180924
CLINT1	3663.25	-0.865596	0.0760543	-11.3813	5.18237e-30	1.24011e-28
BIN2	1173.56	-0.865529	0.119356	-7.25164	4.11753e-13	3.60348e-12
RNF187	2944.73	-0.864957	0.0961264	-8.99812	2.29618e-19	3.16581e-18
GNB3	228.713	-0.864889	0.232246	-3.72402	0.000196074	0.000630541
ATPAF1	922.867	-0.864655	0.108509	-7.96853	1.60578e-15	1.68717e-14
AHCYL2	660.757	-0.864512	0.149656	-5.77667	7.61921e-09	4.40248e-08
TM7SF3	2268.66	-0.863843	0.102405	-8.43558	3.29568e-17	3.91244e-16
HS1BP3	204.846	-0.863341	0.159137	-5.42515	5.7905e-08	3.03503e-07
CPSF3	2011.02	-0.86319	0.103435	-8.34522	7.10803e-17	8.26648e-16
WDR88	104.335	-0.862203	0.245722	-3.50885	0.00045005	0.0013537
ANGEL1	828.586	-0.861278	0.11641	-7.39869	1.37539e-13	1.24913e-12
CERS1	23.3326	-0.861078	0.377829	-2.27902	0.022666	0.0468625
ZMYND10	105.695	-0.861063	0.224889	-3.82883	0.000128752	0.000426577
GABRD	38.62	-0.860905	0.301427	-2.8561	0.0042888	0.0105928
CABLES2	482.111	-0.860729	0.126845	-6.78566	1.15559e-11	8.92919e-11
CENPM	663.843	-0.8605	0.127606	-6.74342	1.54704e-11	1.18092e-10
MRPS26	526.987	-0.860159	0.139594	-6.16186	7.18973e-10	4.62989e-09
MSL1	1549.89	-0.858492	0.140972	-6.08982	1.13036e-09	7.14073e-09
TRMT1L	504.1	-0.858084	0.155253	-5.527	3.25752e-08	1.7552e-07
PFN2	271.182	-0.858016	0.143544	-5.97735	2.26794e-09	1.38903e-08
IFI16	5618.11	-0.857971	0.109205	-7.85649	3.95034e-15	4.06874e-14
ZFP30	337.313	-0.857933	0.164458	-5.21673	1.82109e-07	9.04216e-07
FLT3LG	98.4493	-0.857341	0.214196	-4.0026	6.26498e-05	0.000219292
ADH5	3528.84	-0.857129	0.094326	-9.08688	1.01924e-19	1.4389e-18
CROCCP3	66.9503	-0.856677	0.26087	-3.28392	0.00102372	0.00288422
HECTD3	998.809	-0.856304	0.105768	-8.09608	5.67591e-16	6.14006e-15
PDGFC	139.166	-0.856072	0.17705	-4.8352	1.33015e-06	5.90668e-06
LYRM9	80.7813	-0.856047	0.240975	-3.55243	0.000381692	0.00116308
C3orf67	138.016	-0.855985	0.240639	-3.55713	0.000374933	0.00114356
CBFA2T2	616.895	-0.855548	0.148323	-5.76815	8.01472e-09	4.61497e-08
CACNA1C	31.6964	-0.855032	0.334113	-2.55911	0.010494	0.0236707
ZNF69	62.6131	-0.855002	0.257641	-3.31858	0.000904773	0.00257248
RTKN	137.188	-0.854648	0.179297	-4.76665	1.8731e-06	8.1282e-06
CAND2	455.713	-0.85459	0.120139	-7.11335	1.1326e-12	9.56844e-12
PIK3R3	1466.57	-0.85456	0.137592	-6.21085	5.26984e-10	3.43838e-09
KLK1	49.6862	-0.854409	0.353474	-2.41717	0.0156416	0.0337375
CUL9	1246.69	-0.854276	0.133368	-6.40539	1.49982e-10	1.03862e-09
TRIM2	90.5468	-0.853602	0.243262	-3.50899	0.00044982	0.00135323
AKT1	3918.39	-0.853333	0.0912371	-9.35292	8.52598e-21	1.2882e-19
GMCL1	1081.52	-0.853136	0.0978698	-8.71705	2.85554e-18	3.65069e-17
LRRC37A4P-2	21.8321	-0.852663	0.377807	-2.25687	0.024016	0.0493105
GIPR	75.4444	-0.852104	0.305218	-2.79179	0.00524173	0.0126624
ECT2	2956.66	-0.851699	0.101533	-8.38839	4.92849e-17	5.80932e-16
KIAA2013	952.165	-0.851263	0.112381	-7.57477	3.59763e-14	3.41317e-13
CTDSPL2	2061.09	-0.850881	0.159077	-5.34886	8.85084e-08	4.5427e-07
GATSL3	141.428	-0.850568	0.180542	-4.71121	2.46256e-06	1.04894e-05
GJA3	339.666	-0.85053	0.161193	-5.27648	1.31686e-07	6.67079e-07
ZNF319	301.565	-0.849749	0.177574	-4.78531	1.70723e-06	7.45795e-06
KIAA1804	450.927	-0.849747	0.170627	-4.98013	6.3542e-07	2.93501e-06
BAG2	639.282	-0.849724	0.143219	-5.93304	2.97369e-09	1.79601e-08
BRCC3	736.211	-0.849573	0.198537	-4.27917	1.87595e-05	7.09771e-05
MAP3K9	808.304	-0.84954	0.219353	-3.87294	0.000107532	0.000360613
PPM1L	136.874	-0.84927	0.195552	-4.34295	1.40583e-05	5.42797e-05
GK	154.182	-0.848733	0.172366	-4.92403	8.47796e-07	3.85749e-06
MIA3	1826.08	-0.848286	0.118249	-7.1737	7.29984e-13	6.26553e-12
PGP	722.818	-0.848278	0.125736	-6.74648	1.51475e-11	1.15675e-10
CBX4	1599.38	-0.847855	0.128433	-6.60151	4.06983e-11	2.96788e-10
CUL4B	1280.74	-0.847196	0.11491	-7.37273	1.67174e-13	1.50334e-12
SYNGR1	420.892	-0.846381	0.169423	-4.99567	5.86327e-07	2.72269e-06
P2RX4	302.283	-0.845755	0.148306	-5.70276	1.17882e-08	6.64748e-08
UNG	1401.63	-0.843131	0.106793	-7.895	2.90311e-15	3.01389e-14
CEP192	1461.79	-0.842833	0.108772	-7.7486	9.2914e-15	9.26707e-14
ETS1	7009.28	-0.842824	0.107669	-7.82792	4.95992e-15	5.06294e-14
SH3BP1	493.742	-0.842562	0.115849	-7.2729	3.51839e-13	3.09692e-12
ZNF599	130.517	-0.842103	0.179566	-4.68965	2.73675e-06	1.16033e-05
UBR5	4084.52	-0.842028	0.217945	-3.86348	0.000111782	0.00037367
LEAP2	26.9336	-0.841702	0.368131	-2.28642	0.0222298	0.0460672
ESPN	139.258	-0.841469	0.176434	-4.76931	1.84854e-06	8.03114e-06
RECK	207.094	-0.841441	0.180869	-4.6522	3.28409e-06	1.37927e-05
CD3G	1570.49	-0.841305	0.109382	-7.69144	1.45488e-14	1.4277e-13
GPR63	298.867	-0.84121	0.166388	-5.05573	4.28755e-07	2.02493e-06
TFEB	313.036	-0.840631	0.173209	-4.85329	1.2143e-06	5.41725e-06
EFCAB13	99.627	-0.840546	0.224146	-3.75	0.000176835	0.0005727
TUBG1	2087	-0.840233	0.0932734	-9.00828	2.09311e-19	2.89895e-18
CPT1A	2766.94	-0.840073	0.086375	-9.72588	2.33884e-22	3.85909e-21
CPNE1	2565.67	-0.839948	0.118963	-7.06058	1.65815e-12	1.3773e-11
MYO18B	1470.91	-0.839252	0.267795	-3.13394	0.00172477	0.00463164
LSM14B	1334.29	-0.838391	0.12326	-6.80181	1.03312e-11	8.02701e-11
BAIAP2L2	37.3032	-0.83787	0.355437	-2.3573	0.0184084	0.0390285
RAB27B	40.0077	-0.837536	0.31721	-2.64032	0.00828271	0.0191144
RBKS	62.3115	-0.837147	0.259734	-3.2231	0.00126813	0.00351271
PPM1M	909.951	-0.836841	0.122508	-6.8309	8.43833e-12	6.60401e-11
BCR	2082.2	-0.836789	0.11318	-7.39345	1.43067e-13	1.29483e-12
SPATA7	108.217	-0.836744	0.206389	-4.0542	5.03059e-05	0.000178373
STAG2	4698.18	-0.836395	0.130236	-6.42216	1.34356e-10	9.35021e-10
LOC101927963	26.5249	-0.836251	0.371358	-2.25187	0.0243305	0.0498945
RAD21	12344.5	-0.835317	0.0906345	-9.21632	3.07471e-20	4.48619e-19
MAP3K12	316.935	-0.834955	0.136495	-6.11713	9.52769e-10	6.06494e-09
DSN1	1063.88	-0.834907	0.111533	-7.48573	7.11532e-14	6.57978e-13
RAET1K	48.0765	-0.834848	0.364699	-2.28914	0.022071	0.045759
HOXC10	684.835	-0.834776	0.114057	-7.31897	2.4989e-13	2.21879e-12
MYCBPAP	81.9533	-0.834649	0.262983	-3.17378	0.00150469	0.00409602
PLCB1	224.51	-0.834245	0.146003	-5.71387	1.10434e-08	6.25259e-08
ZSCAN30	280.315	-0.834055	0.179489	-4.64683	3.37073e-06	1.41306e-05
MED20	549.293	-0.833823	0.130909	-6.36949	1.89663e-10	1.29623e-09
PRKG2	104.587	-0.832512	0.198426	-4.19558	2.72177e-05	0.000100321
SNX17	1694.14	-0.832316	0.118734	-7.0099	2.38482e-12	1.94901e-11
MBP	1791.95	-0.832025	0.109088	-7.62711	2.40073e-14	2.3088e-13
PARD6G	195.007	-0.831641	0.18974	-4.38306	1.17023e-05	4.57432e-05
SGSM2	1470.13	-0.831572	0.11535	-7.20913	5.63088e-13	4.87193e-12
C11orf68	496.911	-0.830856	0.200565	-4.14257	3.43431e-05	0.000124773
NLN	734.849	-0.830852	0.213943	-3.88351	0.000102958	0.000346645
FDXR	391.296	-0.830849	0.13925	-5.96659	2.42265e-09	1.48081e-08
PAQR8	324.152	-0.83075	0.128706	-6.45465	1.08471e-10	7.60668e-10
PRKCA	1719.27	-0.830656	0.108156	-7.68019	1.58857e-14	1.54974e-13
C8orf82	362.839	-0.830642	0.147564	-5.62902	1.81234e-08	1.00526e-07
CAMK4	856.111	-0.829846	0.196471	-4.22376	2.40264e-05	8.93877e-05
MCM5	5931.38	-0.828822	0.107809	-7.68791	1.49562e-14	1.46444e-13
ATG10	227.063	-0.828662	0.144906	-5.71863	1.07387e-08	6.09327e-08
TRMU	610.189	-0.827411	0.168696	-4.90476	9.3543e-07	4.23096e-06
CCDC102B	39.7023	-0.826661	0.29996	-2.7559	0.00585309	0.014006
LRP5L	298.766	-0.826582	0.203754	-4.05677	4.97567e-05	0.000176563
WNT10B	144.25	-0.826415	0.29117	-2.83825	0.0045361	0.0111359
PI4K2B	1495.58	-0.826347	0.107422	-7.6925	1.44293e-14	1.41673e-13
CLUAP1	317.857	-0.825176	0.16159	-5.10662	3.27979e-07	1.57337e-06
PTGR2	223.395	-0.825168	0.166359	-4.96016	7.04334e-07	3.24022e-06
FAM217B	1182.46	-0.824096	0.110086	-7.48596	7.10285e-14	6.57158e-13
LRRIQ3	47.9489	-0.822863	0.267336	-3.07802	0.00208384	0.00550133
FLJ10038	119.43	-0.822859	0.234992	-3.50165	0.000462382	0.00138737
PECR	217.705	-0.822694	0.150527	-5.46543	4.61797e-08	2.44712e-07
LOC102724554	157.908	-0.822581	0.247574	-3.32256	0.00089194	0.00253797
GRAP2	1317.38	-0.822477	0.102024	-8.06161	7.52953e-16	8.09915e-15
AK8	33.5148	-0.822397	0.325557	-2.52612	0.011533	0.0257695
RANGRF	164.892	-0.82209	0.173824	-4.72945	2.25131e-06	9.66616e-06
PARP2	1351.36	-0.822064	0.15337	-5.35999	8.32255e-08	4.28962e-07
WDR66	101.707	-0.821728	0.200358	-4.1013	4.10841e-05	0.000147437
RB1	6535.9	-0.821415	0.0891138	-9.2176	3.03826e-20	4.44009e-19
FBXO43	233.449	-0.821314	0.216061	-3.80131	0.000143936	0.000472684
ARHGAP15	1727.03	-0.820702	0.137945	-5.9495	2.68964e-09	1.63406e-08
ZNF737	190.631	-0.820677	0.176443	-4.65124	3.29944e-06	1.38508e-05
HCK	47.113	-0.820418	0.288264	-2.84606	0.00442635	0.0108942
PMEPA1	3430.47	-0.818834	0.0893524	-9.1641	4.99612e-20	7.19924e-19
RTN4IP1	321.065	-0.818815	0.152091	-5.38372	7.29619e-08	3.7798e-07
TFAP4	214.932	-0.818809	0.161764	-5.06175	4.15419e-07	1.96499e-06
LIMA1	1168.25	-0.818419	0.158108	-5.17634	2.26285e-07	1.10821e-06
TTC13	285.413	-0.817488	0.148762	-5.49528	3.901e-08	2.0835e-07
MBNL2	595.101	-0.817071	0.155411	-5.25749	1.46037e-07	7.35089e-07
SBF2	844.717	-0.816656	0.150177	-5.43797	5.38914e-08	2.83442e-07
SLC14A2	40.0822	-0.816404	0.341134	-2.39321	0.0167018	0.0357796
SMARCD2	2578.49	-0.815999	0.0875546	-9.31988	1.16467e-20	1.74386e-19
STRA13	727.013	-0.815592	0.185502	-4.39669	1.09915e-05	4.30663e-05
SCRN1	3568.83	-0.815394	0.131253	-6.2124	5.2182e-10	3.40711e-09
PHF20	1627.12	-0.815348	0.108393	-7.52218	5.38707e-14	5.04025e-13
SIPA1L3	326.493	-0.814484	0.145425	-5.60073	2.13457e-08	1.1726e-07
SRR	444.583	-0.814065	0.146339	-5.56286	2.65383e-08	1.43926e-07
RAB6C	53.6129	-0.813751	0.287267	-2.83273	0.00461518	0.0113073
HBQ1	45.6833	-0.813515	0.290378	-2.80157	0.00508544	0.0123158
CPT1B	57.537	-0.81308	0.328793	-2.47292	0.0134013	0.0294829
APPL1	2151.14	-0.813063	0.086752	-9.37226	7.09963e-21	1.08163e-19
FAM199X	877.344	-0.813054	0.129095	-6.29809	3.01343e-10	2.01653e-09
CHORDC1	1421.27	-0.812738	0.165844	-4.90061	9.5542e-07	4.31497e-06
CD4	2503.63	-0.812683	0.233959	-3.47361	0.000513505	0.00152823
MLC1	33.6217	-0.812634	0.344625	-2.35802	0.0183725	0.0389614
ZNF107	1240.98	-0.811922	0.0948625	-8.55893	1.13915e-17	1.3996e-16
PRKAB1	1325.41	-0.811604	0.104394	-7.77444	7.57833e-15	7.61247e-14
ZNF512	1323.8	-0.810933	0.0926568	-8.75201	2.09589e-18	2.70219e-17
PPIE	1108.98	-0.810731	0.0896353	-9.04477	1.49983e-19	2.09633e-18
OAS1	122.693	-0.810253	0.205752	-3.93801	8.21586e-05	0.000281541
TBC1D24	458.882	-0.810085	0.133379	-6.07354	1.25118e-09	7.85239e-09
NUP133	1592.61	-0.80976	0.0992379	-8.15979	3.35617e-16	3.70069e-15
PAICS	10867.9	-0.809485	0.103438	-7.82576	5.04582e-15	5.14201e-14
NUB1	1582.24	-0.809313	0.0959512	-8.43463	3.3224e-17	3.9416e-16
EIF4B	7568.49	-0.809163	0.149219	-5.42267	5.87156e-08	3.07311e-07
FRAT1	137.715	-0.80901	0.202597	-3.9932	6.51878e-05	0.000227306
WDR70	928.756	-0.808379	0.103714	-7.79433	6.47505e-15	6.54378e-14
AJUBA	361.657	-0.808371	0.133522	-6.05422	1.411e-09	8.80407e-09
ZBTB8A	174.344	-0.80825	0.157555	-5.12997	2.89793e-07	1.40085e-06
[truncated: 4,272 more rows]

## Sheet: RTK3 vs RTK3 PMA_Ion DEG
Gene ID	Mean normalized counts	FC log2	log2 FC standard error	Wald statistic	p-value	Adjusted p-value
HOXA13	45.4634	-4.65571	0.568808	-8.18503	2.72235e-16	2.59496e-15
CNR2	329.209	-4.63108	0.234761	-19.7268	1.2705e-86	9.67349e-85
SOSTDC1	123.61	-4.42192	0.33577	-13.1695	1.31475e-39	3.76355e-38
CREB3L3	109.882	-4.2467	0.339891	-12.4943	8.01986e-36	2.03821e-34
LOC101927834	18.5106	-4.23756	0.701781	-6.0383	1.55744e-09	8.5995e-09
GIMAP4	3054.85	-4.15673	0.183296	-22.6777	7.43918e-114	8.63782e-112
ABCG1	1019.52	-4.11214	0.233116	-17.6399	1.21774e-69	7.29778e-68
BAHCC1	1638.05	-4.1051	0.136372	-30.1022	4.53904e-199	1.47941e-196
RGPD3	187.137	-4.05236	0.305426	-13.2679	3.55456e-40	1.03506e-38
TMEM26	20.9948	-3.95569	0.572182	-6.91334	4.73362e-12	3.26797e-11
PFKFB4	1583.08	-3.91751	0.424588	-9.22662	2.79319e-20	3.48501e-19
GP5	73.8966	-3.90969	0.34817	-11.2293	2.92931e-29	5.71046e-28
MIR210HG-2	28.7185	-3.86905	0.631342	-6.12829	8.88276e-10	5.00376e-09
LINC00528	208.446	-3.83532	0.246768	-15.5422	1.79621e-54	7.85177e-53
TLDC1	996.795	-3.83024	0.186347	-20.5543	7.04056e-94	6.0837e-92
RAB33A	350.825	-3.74382	0.314308	-11.9113	1.03368e-32	2.33338e-31
LOC101928004	46.0752	-3.73346	0.435702	-8.56882	1.04549e-17	1.11756e-16
CASC14	56.9669	-3.7235	0.364156	-10.225	1.53237e-24	2.4024e-23
MIR210HG	94.1551	-3.69524	0.714208	-5.1739	2.29258e-07	1.00098e-06
RAB37	722.706	-3.69059	0.172759	-21.3627	2.97384e-101	2.8626e-99
GPR174	407.854	-3.57364	0.201613	-17.7253	2.67706e-70	1.62531e-68
ANXA2R	315.44	-3.57156	0.288687	-12.3717	3.71795e-35	9.17293e-34
LINC00861	76.548	-3.54437	0.324421	-10.9252	8.73427e-28	1.59867e-26
MOB3A	2482.38	-3.54434	0.192638	-18.3989	1.34056e-75	8.80033e-74
ZNF652	350.004	-3.52581	0.243358	-14.4882	1.43962e-47	5.14331e-46
RGPD1	29.6063	-3.51598	0.475175	-7.39934	1.36861e-13	1.06564e-12
GIMAP7	1517.15	-3.48959	0.120686	-28.9146	7.81653e-184	2.13552e-181
HOXA4	23.5939	-3.4787	0.5667	-6.13852	8.32917e-10	4.70475e-09
ARHGAP25	347.055	-3.47762	0.17032	-20.4182	1.1522e-92	9.4715e-91
2022-09-06	871.124	-3.46842	0.221501	-15.6587	2.89713e-55	1.29072e-53
ADCYAP1	377.481	-3.45893	0.180674	-19.1446	1.07321e-81	7.52379e-80
KCNA3	1119.03	-3.45048	0.23123	-14.9223	2.36055e-50	9.0608e-49
ACKR3	45.3043	-3.44044	0.384908	-8.93833	3.95087e-19	4.58459e-18
GIMAP1	999.959	-3.42743	0.191113	-17.9341	6.39247e-72	3.95864e-70
TET1	549.311	-3.40797	0.252664	-13.4881	1.83672e-41	5.53041e-40
SBK1	1881.88	-3.40325	0.234692	-14.5009	1.19503e-47	4.28597e-46
ASCL4	6.08938	-3.40067	0.770954	-4.41099	1.02901e-05	3.68483e-05
LRRC38	43.9495	-3.38693	0.402153	-8.42199	3.70158e-17	3.77431e-16
LEF1	7681.65	-3.38154	0.14082	-24.0132	2.02304e-127	2.86901e-125
ZNF521	266.576	-3.35961	0.192853	-17.4206	5.75635e-68	3.36294e-66
BHLHE23	72.0034	-3.35322	0.312807	-10.7198	8.22084e-27	1.43405e-25
CEBPE	134.972	-3.34431	0.351227	-9.52179	1.7022e-21	2.28658e-20
KCNA6	48.3601	-3.33834	0.416816	-8.00914	1.15512e-15	1.05092e-14
ARHGAP29	240.101	-3.31144	0.23131	-14.3161	1.73719e-46	6.00996e-45
DDIT4	2123.32	-3.30631	0.554024	-5.96782	2.40444e-09	1.30804e-08
ZNF467	137.874	-3.29576	0.45064	-7.31352	2.60236e-13	1.98304e-12
TMEM169	85.5648	-3.28471	0.317374	-10.3497	4.19986e-25	6.76126e-24
TOB1-AS1	25.2426	-3.27311	0.488559	-6.69952	2.09112e-11	1.3636e-10
CHFR	17.3722	-3.26663	0.638492	-5.11616	3.1181e-07	1.33783e-06
RORB	886.344	-3.23514	0.18504	-17.4834	1.91685e-68	1.13052e-66
POU3F2	181.135	-3.18936	0.233804	-13.6412	2.27812e-42	7.13549e-41
PPFIA4	981.366	-3.18228	0.482374	-6.59712	4.19218e-11	2.67269e-10
CD1D	1048.53	-3.18219	0.109584	-29.0388	2.12964e-185	5.90515e-183
LOC101059954	36.4749	-3.17927	0.400693	-7.93444	2.11442e-15	1.88945e-14
MTL5	160.966	-3.16955	0.257429	-12.3123	7.77796e-35	1.8988e-33
ARHGEF17	87.1738	-3.15937	0.329743	-9.58131	9.58251e-22	1.3042e-20
AFAP1L2	19.9301	-3.14675	0.550951	-5.71149	1.11994e-08	5.68631e-08
CXCR4	2377.48	-3.14527	0.1837	-17.1217	1.02173e-65	5.75205e-64
ID3	1556.53	-3.10225	0.165933	-18.6957	5.362e-78	3.64891e-76
PTCHD4	91.1425	-3.09932	0.275898	-11.2336	2.78993e-29	5.44446e-28
GIMAP8	88.511	-3.08431	0.276056	-11.1727	5.54397e-29	1.06072e-27
C16orf54	176.569	-3.07682	0.242097	-12.709	5.26709e-37	1.38209e-35
GCSAM	191.734	-3.07279	0.343027	-8.95788	3.30966e-19	3.8574e-18
FAM53B	1488.01	-3.07091	0.133927	-22.9297	2.35072e-116	2.83582e-114
HOXA3	54.9012	-3.07081	0.340432	-9.02034	1.87515e-19	2.22172e-18
IFIT1	26.5855	-3.06156	0.502448	-6.09328	1.10619e-09	6.17324e-09
ADRB1	41.0574	-3.04131	0.450776	-6.74683	1.51111e-11	9.97985e-11
S1PR5	73.8689	-3.04066	0.292689	-10.3887	2.79124e-25	4.5368e-24
RCSD1	1493.7	-3.02768	0.153205	-19.7623	6.29147e-87	4.80999e-85
LOC100507520	301.381	-3.01613	0.224137	-13.4566	2.81434e-41	8.43303e-40
GPR157	146.728	-3.01602	0.276396	-10.9119	1.01069e-27	1.84265e-26
LRRC20	464.909	-3.01292	0.146666	-20.5427	8.94747e-94	7.69566e-92
ZFP36L2	3372.71	-2.99753	0.256093	-11.7049	1.20364e-31	2.60317e-30
LOC101929698	6.53663	-2.97744	0.754507	-3.94621	7.93967e-05	0.000249582
FLJ33581	22.4951	-2.97444	0.495758	-5.99979	1.97572e-09	1.08083e-08
SRGAP3	76.1708	-2.97057	0.288484	-10.2972	7.25437e-25	1.15387e-23
LDLRAP1	178.254	-2.96958	0.201008	-14.7735	2.17259e-49	8.154e-48
DBP	340.844	-2.9578	0.307024	-9.63378	5.75731e-22	7.92879e-21
GSDMB	343.544	-2.95098	0.337096	-8.75412	2.05706e-18	2.29526e-17
ETV6	333.412	-2.91879	0.16544	-17.6426	1.15952e-69	6.97136e-68
LOC102723543	4.06625	-2.9184	0.789563	-3.69622	0.000218835	0.000641958
KCNIP3	15.8539	-2.91261	0.581964	-5.0048	5.59214e-07	2.33515e-06
ANKZF1	2114.17	-2.89026	0.414298	-6.97627	3.03123e-12	2.12426e-11
ALDH1B1	105.112	-2.88912	0.302184	-9.56078	1.1687e-21	1.57792e-20
LOC102723730	26.0725	-2.88161	0.618799	-4.65678	3.21199e-06	1.22455e-05
FLI1	1263.37	-2.8739	0.1174	-24.4795	2.44352e-132	3.69072e-130
SMAD6	100.262	-2.86846	0.263007	-10.9064	1.07438e-27	1.9492e-26
AMPD3	360.357	-2.8589	0.172229	-16.5994	7.0387e-62	3.66288e-60
LOC113230	128.607	-2.85697	0.383809	-7.44373	9.78809e-14	7.7183e-13
LOC440570	12.9094	-2.84964	0.582691	-4.89048	1.00588e-06	4.07041e-06
DTX1	1506.94	-2.84535	0.121609	-23.3975	4.53325e-121	5.76841e-119
GIMAP5	70.2296	-2.83697	0.31121	-9.11594	7.79927e-20	9.43325e-19
FUT11	498.371	-2.83594	0.340215	-8.33574	7.70175e-17	7.65151e-16
FZD2	165.935	-2.82799	0.227704	-12.4196	2.04693e-35	5.11815e-34
NDST3	357.032	-2.82622	0.364399	-7.75583	8.77673e-15	7.48298e-14
KCTD16	5.17227	-2.82278	0.7507	-3.7602	0.000169778	0.000507832
DUSP5P1	106.194	-2.81935	0.244948	-11.51	1.17503e-30	2.45277e-29
CHAD	32.5914	-2.81859	0.569193	-4.95191	7.34877e-07	3.03188e-06
MYO16	137.632	-2.80971	0.21388	-13.1369	2.02403e-39	5.74961e-38
PPM1H	87.41	-2.80112	0.278075	-10.0733	7.25326e-24	1.10001e-22
SASH3	1761.84	-2.7868	0.109419	-25.4691	4.34016e-143	7.53566e-141
LOC100506734	297.127	-2.78536	0.162863	-17.1025	1.42246e-65	7.95977e-64
FBLN5	13.4368	-2.77954	0.626133	-4.43921	9.02886e-06	3.25768e-05
CD244	183.186	-2.77723	0.196738	-14.1164	3.00955e-45	1.00923e-43
SIT1	2040.8	-2.77097	0.12092	-22.9158	3.23646e-116	3.87916e-114
LRRC45	354.518	-2.76675	0.173898	-15.9102	5.37997e-57	2.51129e-55
SOX4	3587.76	-2.76035	0.134146	-20.5771	4.40201e-94	3.85758e-92
LMO1	114.889	-2.75316	0.263498	-10.4485	1.48838e-25	2.45351e-24
LOC102724536	58.7338	-2.72172	0.440269	-6.18194	6.33171e-10	3.61739e-09
C20orf112	360.323	-2.71722	0.191313	-14.203	8.77925e-46	2.98174e-44
C1QTNF3	41.1497	-2.71637	0.378527	-7.17616	7.16991e-13	5.28162e-12
LOC102724645	12.1283	-2.69429	0.618837	-4.35379	1.33803e-05	4.70883e-05
RAB26	290.104	-2.68901	0.283807	-9.47477	2.67339e-21	3.54506e-20
OSBPL5	603.899	-2.6878	0.242957	-11.0629	1.8992e-28	3.56398e-27
RAB3D	447.364	-2.6853	0.130891	-20.5155	1.56694e-93	1.32321e-91
RAP1GAP2	373.47	-2.68226	0.183793	-14.5939	3.07324e-48	1.11513e-46
MIR3186	5.1003	-2.6816	0.768755	-3.48825	0.000486202	0.00135139
TRNAG2	6.13146	-2.67163	0.722749	-3.69648	0.00021861	0.0006414
INPP5D	478.025	-2.66824	0.243936	-10.9383	7.56199e-28	1.38821e-26
LOC102723572	3.30526	-2.65553	0.798107	-3.32729	0.000876962	0.00233815
MGAT4A	2817.03	-2.64465	0.232079	-11.3955	4.40419e-30	8.93243e-29
KRT72	28.8806	-2.6442	0.537305	-4.92123	8.60016e-07	3.51847e-06
NFIA	38.1383	-2.64228	0.370904	-7.12388	1.04928e-12	7.61465e-12
LINC00173	14.4262	-2.64187	0.644914	-4.09646	4.19511e-05	0.000137358
ZMYM3	1460.14	-2.63772	0.16842	-15.6616	2.77002e-55	1.24004e-53
LINC00260	7.1617	-2.63698	0.681944	-3.86685	0.000110251	0.000339845
HOXD-AS1	17.0353	-2.63564	0.534759	-4.92865	8.27996e-07	3.3942e-06
YPEL1	751.333	-2.63543	0.268335	-9.82141	9.10604e-23	1.30333e-21
C5orf56	118.45	-2.63216	0.263513	-9.98873	1.70747e-23	2.52961e-22
RGPD2	60.7723	-2.6317	0.378591	-6.95128	3.61976e-12	2.51865e-11
AARD	151.507	-2.62956	0.251538	-10.4539	1.4063e-25	2.32027e-24
RASGRP2	826.172	-2.62455	0.11787	-22.2665	7.80099e-110	8.52511e-108
HES7	133.043	-2.62313	0.250031	-10.4912	9.47909e-26	1.57516e-24
WT1	177.475	-2.61542	0.227207	-11.5112	1.15885e-30	2.42445e-29
GDPD3	180.36	-2.60816	0.355322	-7.34028	2.13144e-13	1.63628e-12
HCG27-5	10.3755	-2.60711	0.649593	-4.01345	5.98379e-05	0.000191008
ANTXRLP1	24.1369	-2.60599	0.441141	-5.90739	3.47575e-09	1.85927e-08
DAAM2	1298.05	-2.60013	0.201121	-12.9282	3.12147e-38	8.50304e-37
HIST1H3D	11.2423	-2.59468	0.618501	-4.19512	2.72732e-05	9.20067e-05
TBX6	67.3675	-2.58896	0.352811	-7.33809	2.16671e-13	1.66267e-12
KCTD11	48.9738	-2.58869	0.529187	-4.89182	9.99059e-07	4.0481e-06
CCR8	7.5495	-2.58136	0.705733	-3.6577	0.000254492	0.000738857
RP11-445H22.3	284.306	-2.57794	0.182592	-14.1186	2.91879e-45	9.80565e-44
SERINC5	3949.98	-2.5773	0.229977	-11.2068	3.77669e-29	7.31631e-28
FAM78A	1087.78	-2.57716	0.104661	-24.6239	7.01064e-134	1.07639e-131
MIR29C	10.0178	-2.56675	0.643557	-3.98838	6.6525e-05	0.000211121
SYK	1834.26	-2.56638	0.102611	-25.0107	4.67292e-138	7.82104e-136
CNN2	2296.48	-2.56472	0.0970539	-26.4257	6.94137e-154	1.37188e-151
NEURL1B	457.454	-2.55222	0.243516	-10.4807	1.0596e-25	1.75761e-24
LINC00563	13.5336	-2.55175	0.582322	-4.38203	1.17579e-05	4.17903e-05
DHRS13	343.056	-2.5487	0.145259	-17.5459	6.39422e-69	3.81967e-67
SLC25A29	1716.45	-2.54589	0.175995	-14.4657	1.99578e-47	7.10298e-46
SPTBN1	9351.66	-2.54547	0.120983	-21.0398	2.83632e-98	2.63466e-96
ESPNP	36.1801	-2.54379	0.44557	-5.70907	1.13592e-08	5.75801e-08
TMEM187	161.588	-2.54115	0.235091	-10.8092	3.11307e-27	5.52913e-26
C16orf74	147.698	-2.53949	0.269657	-9.41749	4.6202e-21	6.02344e-20
C21orf128	2.98248	-2.53426	0.801165	-3.16322	0.00156035	0.00398517
SLC15A2	98.8613	-2.53248	0.350983	-7.21538	5.37839e-13	3.992e-12
OTX2	9.04922	-2.53072	0.621572	-4.07149	4.67138e-05	0.000151748
EFNA3	660.437	-2.52435	0.322775	-7.82078	5.24964e-15	4.55951e-14
PIGZ	136.341	-2.51905	0.277412	-9.08053	1.08049e-19	1.29841e-18
MEOX1	10.8743	-2.51255	0.634935	-3.95718	7.5841e-05	0.000239052
LOC101929174	19.4592	-2.51219	0.517839	-4.8513	1.22655e-06	4.91627e-06
KC6	12.4021	-2.51012	0.623712	-4.02448	5.71013e-05	0.000182807
HHIP-AS1	767.507	-2.51006	0.18497	-13.5701	6.02168e-42	1.83998e-40
PLGLB2	32.5238	-2.50946	0.384818	-6.52116	6.97639e-11	4.3507e-10
C2CD2	108.836	-2.50794	0.291917	-8.59128	8.60056e-18	9.26268e-17
LOC100130285	5.52818	-2.50318	0.732084	-3.41925	0.000627943	0.00171381
LCN15	10.1152	-2.50215	0.600364	-4.16773	3.07652e-05	0.000102946
C2orf15	49.4596	-2.49549	0.320999	-7.77413	7.59684e-15	6.51889e-14
C1orf204	14.7063	-2.4933	0.592243	-4.20993	2.55452e-05	8.65229e-05
TRIM46	210.442	-2.4922	0.19976	-12.4759	1.00996e-35	2.55627e-34
SPINT1	483.223	-2.49043	0.143528	-17.3515	1.92272e-67	1.11278e-65
FAM13A	93.3947	-2.48202	0.38059	-6.52151	6.96031e-11	4.34213e-10
AP001258.4	37.443	-2.48058	0.382438	-6.48625	8.80006e-11	5.42427e-10
LOC730101	207.653	-2.48045	0.205472	-12.0719	1.48603e-33	3.48578e-32
ATG9B	594.192	-2.47183	0.322137	-7.67322	1.67734e-14	1.39488e-13
P2RX5	211.617	-2.47032	0.175623	-14.066	6.14197e-45	2.03397e-43
LOC101927437	6.34273	-2.4632	0.76021	-3.24016	0.00119463	0.00311274
CDCA7	3936.36	-2.46257	0.147182	-16.7315	7.73276e-63	4.09286e-61
TTC16	124.657	-2.45109	0.312302	-7.84847	4.21145e-15	3.67498e-14
TXNIP	2509.14	-2.45099	0.147964	-16.5648	1.25284e-61	6.48336e-60
KIF19	6.9596	-2.4502	0.799574	-3.06438	0.0021812	0.00541815
LOC101927929	14.7664	-2.44985	0.542113	-4.51907	6.21106e-06	2.29128e-05
KDM4B	2416.81	-2.44117	0.203291	-12.0083	3.21389e-33	7.39871e-32
SVILP1	23.0723	-2.43726	0.474997	-5.13109	2.88063e-07	1.24168e-06
KIF13A	8.10183	-2.43273	0.704695	-3.45218	0.000556086	0.00153029
VPS37D	117.596	-2.43218	0.331987	-7.32613	2.36899e-13	1.8134e-12
KLF2	80.4061	-2.43156	0.298185	-8.15455	3.50485e-16	3.31196e-15
MOCS1	1456	-2.42612	0.192747	-12.587	2.48843e-36	6.37655e-35
AK4	378.698	-2.42349	0.268361	-9.03071	1.70567e-19	2.02609e-18
C20orf197	283.752	-2.42276	0.189301	-12.7984	1.6729e-37	4.43354e-36
RBM20	3.77113	-2.41982	0.772773	-3.13135	0.00174007	0.00440602
TUBA3FP	8.79978	-2.41804	0.649354	-3.72377	0.000196273	0.000581001
EGLN1	1623.15	-2.41716	0.23576	-10.2526	1.15162e-24	1.81619e-23
RP11-305P22.9	17.3584	-2.41604	0.540635	-4.46888	7.86293e-06	2.85866e-05
PI16	2065.16	-2.41313	0.26878	-8.97808	2.75532e-19	3.22751e-18
MYCL	67.3287	-2.40491	0.27413	-8.77287	1.74163e-18	1.94799e-17
P2RX1	61.5127	-2.40424	0.324105	-7.4181	1.18816e-13	9.31375e-13
TMEM63A	824.235	-2.4041	0.223242	-10.769	4.82089e-27	8.46526e-26
CLDN4	3.82688	-2.40181	0.772788	-3.10798	0.00188374	0.00473048
PGPEP1	484.673	-2.40099	0.182029	-13.1902	9.99723e-40	2.87951e-38
KLHL32	41.1153	-2.39621	0.405206	-5.91357	3.34773e-09	1.79337e-08
ZBP1	4.90649	-2.39568	0.732155	-3.27209	0.00106754	0.00280599
SLC23A1	183.775	-2.39529	0.210842	-11.3606	6.569e-30	1.31934e-28
ZNF775	229.469	-2.38804	0.198216	-12.0477	1.99545e-33	4.63972e-32
DENND3	1285.71	-2.38703	0.172757	-13.8173	2.00553e-43	6.40183e-42
LOC101926948	15.4206	-2.38442	0.536166	-4.44718	8.70062e-06	3.14781e-05
PTGES2-AS1	7.23898	-2.38162	0.67241	-3.54192	0.00039722	0.00111896
BTN3A3	268.128	-2.38027	0.178808	-13.3119	1.97499e-40	5.79643e-39
C11orf21	2.87521	-2.37945	0.804847	-2.95641	0.00311247	0.00749883
SPEG	595.109	-2.37754	0.188246	-12.63	1.44285e-36	3.72295e-35
P2RX7	23.4944	-2.37643	0.461495	-5.14942	2.61292e-07	1.13232e-06
F2R	245.167	-2.37286	0.2165	-10.9601	5.94577e-28	1.09475e-26
SIX6	866.692	-2.37223	0.124663	-19.0292	9.77662e-81	6.80262e-79
C14orf132	311.718	-2.36872	0.159281	-14.8713	5.06081e-50	1.92663e-48
MXD3	762.649	-2.36609	0.304766	-7.76361	8.25434e-15	7.05053e-14
LINC00885	15.1596	-2.36332	0.544815	-4.33784	1.43891e-05	5.04474e-05
C1orf233	203.462	-2.36106	0.205123	-11.5105	1.16811e-30	2.44108e-29
DICER1-AS1	28.1977	-2.36106	0.507121	-4.6558	3.22726e-06	1.22987e-05
CYP26A1	43.3669	-2.36105	0.402412	-5.86725	4.43092e-09	2.35193e-08
B3GNT3	4.137	-2.36038	0.785734	-3.00405	0.00266414	0.00650473
CD34	210.848	-2.35891	0.283267	-8.32751	8.2557e-17	8.17561e-16
LINC00663	22.4116	-2.34636	0.485754	-4.83034	1.36303e-06	5.43283e-06
THRA	329.079	-2.34409	0.173164	-13.5368	9.48664e-42	2.87509e-40
LOC101927789	37.8677	-2.34121	0.400813	-5.84115	5.1843e-09	2.73619e-08
NRROS	977.27	-2.34088	0.128999	-18.1465	1.36807e-73	8.73401e-72
CDH3	2.57489	-2.33923	0.804856	-2.90639	0.00365624	0.00869838
LINC01115	3.74486	-2.337	0.779272	-2.99895	0.00270913	0.00660501
AMT	149.53	-2.3364	0.293919	-7.94914	1.87814e-15	1.68561e-14
DAND5	4.88236	-2.33583	0.74151	-3.1501	0.00163215	0.00415713
KANK4	9.27504	-2.33454	0.614383	-3.79982	0.000144802	0.000436924
LOC100131289	76.4328	-2.33298	0.333833	-6.98847	2.77904e-12	1.95121e-11
POU5F1P3	3.59178	-2.33268	0.7786	-2.99599	0.00273552	0.00666237
NLRC3	517.095	-2.32115	0.236442	-9.81699	9.51443e-23	1.35969e-21
TENM1	42.1225	-2.32111	0.333939	-6.95069	3.63504e-12	2.52739e-11
NUDT6	47.0935	-2.32099	0.384892	-6.03023	1.63723e-09	9.01765e-09
FKBP9L	2.74288	-2.31972	0.805534	-2.87973	0.0039801	0.00940503
KIAA1257	27.9652	-2.31724	0.412662	-5.61536	1.96152e-08	9.7228e-08
CXCR5	7.8264	-2.31606	0.633346	-3.65686	0.000255322	0.000741035
ORM2	6.94841	-2.31019	0.679952	-3.39758	0.000679835	0.00184487
ATP2B3	294.35	-2.30944	0.183422	-12.5909	2.36978e-36	6.0809e-35
LOC101928806	24.5542	-2.30829	0.430281	-5.3646	8.11278e-08	3.72975e-07
KRT73	15.3647	-2.30548	0.635037	-3.63046	0.000282916	0.000814381
GSC	904.123	-2.30517	0.488578	-4.71811	2.38042e-06	9.22476e-06
CD8A	84.3001	-2.30154	0.296301	-7.76758	8.00008e-15	6.84595e-14
HEPACAM	3.60143	-2.3002	0.780111	-2.94856	0.00319262	0.00767203
RAB4B-EGLN2	2.58439	-2.29947	0.80553	-2.85461	0.00430895	0.0101139
ALS2CL	120.742	-2.29882	0.247237	-9.29803	1.43073e-20	1.81558e-19
RP11-563J2.2	11.6518	-2.29871	0.601516	-3.82152	0.000132631	0.000403341
CORO2A	371.868	-2.29759	0.187235	-12.2711	1.29446e-34	3.1313e-33
ERP27	134.237	-2.29358	0.240001	-9.55655	1.21751e-21	1.64024e-20
PKP1	4.69026	-2.29244	0.750819	-3.05325	0.0022638	0.00560236
PTGER3	457.596	-2.29069	0.227988	-10.0474	9.4291e-24	1.41956e-22
LOC102724570	3.51292	-2.28902	0.779073	-2.93813	0.003302	0.00791746
HSD17B13	6.36762	-2.28389	0.735422	-3.10555	0.00189926	0.00476689
ZC3H6	231.697	-2.28008	0.393684	-5.79164	6.97013e-09	3.6201e-08
LOC101060038	11.6874	-2.27931	0.610541	-3.73326	0.000189016	0.000560949
MYO7B	26842.5	-2.27492	0.253396	-8.97771	2.76459e-19	3.23633e-18
RORA	822.84	-2.27391	0.441968	-5.14497	2.67562e-07	1.15734e-06
OPRL1	22.8412	-2.27203	0.431806	-5.2617	1.42733e-07	6.38502e-07
LOC102724660	55.1231	-2.27198	0.481005	-4.7234	2.31936e-06	8.99751e-06
ST3GAL4-AS1	59.9865	-2.26561	0.284777	-7.95574	1.78066e-15	1.60121e-14
DHX58	237.291	-2.26315	0.276336	-8.18985	2.61544e-16	2.49947e-15
PHACTR3	12.1743	-2.26218	0.645029	-3.5071	0.000453021	0.00126712
LOC728743	448.768	-2.26185	0.198032	-11.4217	3.25929e-30	6.65397e-29
RP11-611D20.2	33.5279	-2.25842	0.43955	-5.13802	2.77647e-07	1.19929e-06
BIN1	859.295	-2.25559	0.128735	-17.5213	9.8634e-69	5.87315e-67
MLLT3	555.814	-2.25504	0.208947	-10.7924	3.73963e-27	6.61036e-26
MNX1	197.439	-2.25417	0.236802	-9.51922	1.74487e-21	2.34052e-20
FAM46C	555.427	-2.25197	0.137764	-16.3466	4.59686e-60	2.28343e-58
MIR4269	6.57216	-2.25042	0.682751	-3.2961	0.000980369	0.00259338
LOC100130899	34.6973	-2.25014	0.384752	-5.84828	4.96673e-09	2.62659e-08
RCN3	274.978	-2.24981	0.183062	-12.2899	1.02687e-34	2.49701e-33
CDC42BPG	162.646	-2.24566	0.192653	-11.6565	2.1256e-31	4.57054e-30
OAS2	558.066	-2.24249	0.17334	-12.937	2.78402e-38	7.61731e-37
APOL3	475.289	-2.24101	0.130392	-17.1867	3.33743e-66	1.90193e-64
LINC00494	22.5418	-2.24031	0.45006	-4.9778	6.43121e-07	2.67052e-06
ADM	234.949	-2.23964	0.612631	-3.65577	0.000256413	0.000743738
RGMA	90.0369	-2.23669	0.258869	-8.64024	5.60969e-18	6.09099e-17
LIME1	1357.59	-2.23245	0.147388	-15.1467	7.96947e-52	3.17038e-50
RHPN1	1713.3	-2.23141	0.135136	-16.5124	2.98817e-61	1.52932e-59
C10orf25	324.478	-2.23099	0.141438	-15.7736	4.72782e-56	2.16339e-54
SLC9A3R2	431.563	-2.22975	0.149656	-14.8991	3.33988e-50	1.27935e-48
ABCG4	132.583	-2.2282	0.196581	-11.3348	8.82571e-30	1.75927e-28
ZNF250	213.355	-2.22622	0.292289	-7.61653	2.60592e-14	2.13669e-13
ARL4C	1122.54	-2.22067	0.147885	-15.0162	5.75401e-51	2.24576e-49
PRKCQ	757.35	-2.21722	0.111801	-19.8318	1.58204e-87	1.21955e-85
HMX2	108.422	-2.21643	0.305728	-7.2497	4.17692e-13	3.12521e-12
MYT1L	61.6339	-2.21537	0.29496	-7.51075	5.87889e-14	4.70565e-13
FLJ39095	8.49881	-2.21265	0.619594	-3.57113	0.000355439	0.00100768
GPR162	168.774	-2.2085	0.410283	-5.38287	7.33081e-08	3.38617e-07
C16orf86	35.003	-2.20789	0.413342	-5.34155	9.21531e-08	4.20128e-07
BMF	303.934	-2.20722	0.25227	-8.74943	2.14427e-18	2.3869e-17
PLEKHF1	905.221	-2.20532	0.26042	-8.46831	2.48975e-17	2.57255e-16
TSC22D3	28.774	-2.2026	0.519246	-4.24191	2.21623e-05	7.57136e-05
TAL1	2645.84	-2.20172	0.0798364	-27.5779	2.04724e-167	4.58237e-165
SMIM3	464.491	-2.20145	0.163155	-13.493	1.72039e-41	5.18855e-40
LINC00051	39.4924	-2.20134	0.369421	-5.9589	2.53935e-09	1.3762e-08
TNFRSF25	85.3357	-2.20022	0.327241	-6.72356	1.77335e-11	1.16374e-10
ELFN2	2.75609	-2.19899	0.806335	-2.72714	0.0063886	0.0144248
THAP8	178.636	-2.19888	0.23098	-9.51979	1.73532e-21	2.32939e-20
GLCCI1	605.296	-2.19796	0.158136	-13.8991	6.41298e-44	2.06841e-42
MKNK2	7525.29	-2.19357	0.267418	-8.20278	2.34885e-16	2.25747e-15
HSBP1L1	81.0248	-2.19127	0.298818	-7.33313	2.24834e-13	1.72317e-12
DCST1	6.5164	-2.19121	0.690294	-3.17431	0.00150192	0.0038476
LOC102724942	7.61731	-2.19056	0.664262	-3.29773	0.000974684	0.00258054
ATP2C2	88.0224	-2.18937	0.282423	-7.75208	9.0397e-15	7.68602e-14
MESP2	7.44192	-2.18458	0.6711	-3.25522	0.00113305	0.00296519
ARHGEF39	248.05	-2.17556	0.177247	-12.2742	1.24635e-34	3.01886e-33
GAS2L1	1450.29	-2.173	0.152561	-14.2434	4.92456e-46	1.68487e-44
LOC101927806	10.6934	-2.17232	0.598126	-3.63188	0.000281361	0.000810155
XKR5	47.5709	-2.16878	0.406314	-5.33769	9.4137e-08	4.28541e-07
RTEL1-TNFRSF6B	4.1476	-2.1627	0.746031	-2.89894	0.00374423	0.00888723
ST6GALNAC1	20.698	-2.1553	0.544283	-3.95988	7.49861e-05	0.000236503
SENCR	15.1863	-2.15375	0.519996	-4.14185	3.44511e-05	0.000114394
SCGB1B2P	4.15073	-2.15218	0.752201	-2.86117	0.00422076	0.00992806
HES2	3.22858	-2.14991	0.785838	-2.73582	0.00622245	0.0140873
HHIP	940.999	-2.14905	0.140158	-15.3331	4.59316e-53	1.90473e-51
PITPNM3	17.8094	-2.14798	0.521489	-4.11894	3.80627e-05	0.000125444
LRMP	164.942	-2.14794	0.184543	-11.6392	2.60357e-31	5.57249e-30
LAMB2P1	16.5446	-2.14561	0.516228	-4.15633	3.23403e-05	0.000107925
MYO1F	51.6911	-2.14377	0.297025	-7.21747	5.2963e-13	3.93421e-12
UBE2Q2P3-2	2.41615	-2.14215	0.806307	-2.65675	0.0078899	0.0174873
C15orf52	31.0562	-2.14108	0.378207	-5.66113	1.50382e-08	7.54063e-08
LINC00461	8.28179	-2.13755	0.656593	-3.25551	0.00113188	0.00296253
CHRNA3	594.308	-2.13709	0.189823	-11.2584	2.10656e-29	4.14135e-28
LOC100506634	111.194	-2.13612	0.263949	-8.09292	5.82507e-16	5.41361e-15
PTGDR2	42.1132	-2.13224	0.412792	-5.16541	2.3991e-07	1.04601e-06
SH3D21	332.928	-2.13019	0.282653	-7.5364	4.83119e-14	3.8905e-13
LOC440461	17.4452	-2.12769	0.523032	-4.06799	4.742e-05	0.000153827
BACE1	129.069	-2.12526	0.201029	-10.5719	4.02148e-26	6.79192e-25
PLXNB2	72.0206	-2.12523	0.383774	-5.53772	3.06426e-08	1.48559e-07
OR10R2	3.14827	-2.12497	0.78954	-2.69141	0.00711511	0.0159086
LOC102724060	3.95792	-2.1233	0.749681	-2.83227	0.00462186	0.0107695
GPA33	218.701	-2.12233	0.285663	-7.42949	1.0902e-13	8.56759e-13
HOXC11	73.1052	-2.12099	0.315607	-6.72036	1.81274e-11	1.18874e-10
SH2D3C	563.853	-2.12011	0.301167	-7.03965	1.92717e-12	1.36966e-11
GIPR	97.5155	-2.11225	0.349816	-6.03817	1.55871e-09	8.60298e-09
NPHP3-ACAD11	36.9547	-2.1112	0.428155	-4.93094	8.18365e-07	3.35842e-06
CCDC88C	2977.51	-2.11023	0.155835	-13.5414	8.90469e-42	2.70313e-40
ABLIM2	8.01963	-2.10913	0.646325	-3.26326	0.00110137	0.00288755
IL22RA1	132.714	-2.10597	0.205275	-10.2593	1.07529e-24	1.70016e-23
PARP10	843.389	-2.10437	0.111496	-18.874	1.86757e-79	1.28502e-77
COL23A1	2.35567	-2.10316	0.806151	-2.60889	0.00908373	0.0198913
RP11-18H21.1	92.3538	-2.10213	0.31546	-6.6637	2.67018e-11	1.72785e-10
PROX2	15.6434	-2.10213	0.497599	-4.22454	2.3943e-05	8.14827e-05
DAB1	60.3384	-2.10114	0.282967	-7.4254	1.12439e-13	8.82508e-13
KISS1R	33.908	-2.09866	0.419379	-5.00422	5.60873e-07	2.34155e-06
ALOXE3	18.0352	-2.0972	0.513704	-4.08251	4.45523e-05	0.000145286
CYP3A43	3.3844	-2.09709	0.795205	-2.63716	0.00836025	0.018444
PSRC1	490.9	-2.09587	0.288897	-7.25472	4.02483e-13	3.01384e-12
GKAP1	257.071	-2.09403	0.286207	-7.31649	2.54536e-13	1.9412e-12
FGD5	272.651	-2.0914	0.206123	-10.1464	3.43904e-24	5.28457e-23
UGT8	5.27727	-2.09121	0.731177	-2.86006	0.0042356	0.00995558
UPK1A-AS1	21.2857	-2.08527	0.507624	-4.10791	3.99263e-05	0.000131121
STK32C	86.516	-2.08476	0.24127	-8.64075	5.58449e-18	6.06718e-17
ZNF395	1373.82	-2.08337	0.187904	-11.0874	1.44413e-28	2.72375e-27
RP11-61I13.3	251.507	-2.08267	0.263987	-7.88929	3.03913e-15	2.68862e-14
LINC00665	4.0073	-2.07975	0.759206	-2.73938	0.00615555	0.0139512
TP53INP1	265.394	-2.0784	0.241842	-8.59406	8.39465e-18	9.05666e-17
PRSS53	291.635	-2.07253	0.238901	-8.67526	4.12606e-18	4.52235e-17
AKAP2	29.238	-2.07202	0.402691	-5.14545	2.66883e-07	1.15467e-06
ST8SIA6	52.4682	-2.06522	0.296832	-6.95754	3.46265e-12	2.41204e-11
ACAP1	3726.04	-2.0645	0.155702	-13.2593	3.98453e-40	1.15844e-38
FAM65A	1350.13	-2.0641	0.175037	-11.7924	4.27371e-32	9.37391e-31
FOXD2-AS1	246.254	-2.06383	0.356281	-5.7927	6.92629e-09	3.59935e-08
C20orf203	7.32054	-2.0636	0.69543	-2.96737	0.00300361	0.00725914
HOXC5	4.92988	-2.0624	0.731026	-2.82125	0.00478371	0.0111048
NT5M	281.487	-2.06171	0.22291	-9.24906	2.26476e-20	2.83905e-19
LOC102724172	6.64856	-2.06028	0.653232	-3.15398	0.00161058	0.00410556
RNF207	40.9701	-2.05816	0.39	-5.27733	1.3108e-07	5.89067e-07
KIAA1211	33.8311	-2.05631	0.410768	-5.00601	5.55711e-07	2.32104e-06
ACVR2B-AS1	40.0568	-2.05588	0.352375	-5.83434	5.40048e-09	2.84382e-08
LOC101928502	11.2365	-2.05406	0.673714	-3.04887	0.00229706	0.00567258
VPS26B	5873.46	-2.05331	0.251087	-8.17769	2.89328e-16	2.75506e-15
CMTM1	77.4431	-2.05237	0.250272	-8.20055	2.39293e-16	2.29746e-15
HSPA6	30.2392	-2.05204	0.487343	-4.21067	2.54613e-05	8.62545e-05
MAG	2.85745	-2.04821	0.790254	-2.59184	0.00954643	0.0208284
AFF1	1166.35	-2.04511	0.106145	-19.2672	1.01364e-82	7.27081e-81
EME1	877.035	-2.04497	0.224225	-9.12019	7.49926e-20	9.08222e-19
LOC100506379	6.64218	-2.04381	0.665651	-3.0704	0.00213775	0.00531804
SP9	9.64781	-2.03963	0.602177	-3.3871	0.000706356	0.00191181
PAQR4	725.419	-2.03934	0.120279	-16.9551	1.76513e-64	9.56052e-63
KANK2	857.978	-2.03829	0.114221	-17.8451	3.1558e-71	1.93493e-69
LOC400682	3.255	-2.03657	0.795288	-2.5608	0.0104433	0.0226178
TRNT	110.493	-2.03478	0.297614	-6.83699	8.08743e-12	5.46159e-11
LINC00669	98.3655	-2.03288	0.237223	-8.56949	1.03945e-17	1.11174e-16
RBM43	165.181	-2.03276	0.263031	-7.72821	1.09069e-14	9.20203e-14
SLFN5	556.535	-2.03153	0.131014	-15.5062	3.14891e-54	1.36683e-52
SOAT2	133.158	-2.02978	0.199042	-10.1978	2.02888e-24	3.16289e-23
RENBP	42.7946	-2.02965	0.401153	-5.05953	4.20288e-07	1.7778e-06
PCAT6	10.959	-2.02792	0.615812	-3.29309	0.00099093	0.00261945
LOC100505771	58.8342	-2.02578	0.325921	-6.21557	5.11397e-10	2.95146e-09
CCDC19	10.1718	-2.02495	0.645453	-3.13725	0.00170539	0.00432766
ATP8A2	684.779	-2.02463	0.21147	-9.5741	1.02746e-21	1.39533e-20
CMTM2	10.7999	-2.0162	0.609049	-3.3104	0.000931612	0.00247215
LINC00426	76.839	-2.01415	0.251232	-8.01709	1.08284e-15	9.89033e-15
LOC101927471	4.92266	-2.01367	0.740888	-2.71792	0.00656947	0.0147883
BCL11B	1831.39	-2.01279	0.130154	-15.4647	6.00498e-54	2.58242e-52
TTC28	220.426	-2.01223	0.291926	-6.89294	5.4649e-12	3.75053e-11
EVPLL	13.2402	-2.01222	0.544416	-3.69611	0.000218926	0.000642021
PLA2G4B	13.4274	-2.01075	0.544454	-3.69314	0.000221503	0.000648964
C1orf74	90.1333	-2.01012	0.234361	-8.57702	9.73605e-18	1.04372e-16
SLC29A4	567.4	-2.0101	0.230121	-8.73499	2.43678e-18	2.70595e-17
PROCA1	45.181	-2.00756	0.419593	-4.78455	1.71369e-06	6.75371e-06
RHOBTB1	10.3734	-2.0073	0.591445	-3.39389	0.000689066	0.00186801
LINC01011	26.652	-2.00452	0.440553	-4.55002	5.364e-06	1.99265e-05
RNF165	48.0043	-2.00436	0.414056	-4.8408	1.29321e-06	5.17227e-06
LYN	10.2593	-2.00397	0.576777	-3.47443	0.000511932	0.00141705
DNAJB13	36.7624	-2.00218	0.395883	-5.0575	4.24778e-07	1.79475e-06
SKOR1	9.35876	-2.00001	0.679399	-2.94379	0.00324223	0.00778521
LOC100128288	19.5294	-1.99866	0.456915	-4.37424	1.21857e-05	4.32117e-05
DRAXIN	39.3276	-1.99839	0.326566	-6.1194	9.39287e-10	5.27671e-09
MIR324	10.8194	-1.99805	0.618069	-3.23274	0.00122611	0.00318849
ZNF280D	734.225	-1.99739	0.119683	-16.689	1.57479e-62	8.31151e-61
TRAM2	1051.78	-1.99645	0.19064	-10.4723	1.15745e-25	1.9148e-24
ARHGEF4	2.96682	-1.99637	0.796463	-2.50655	0.0121916	0.026034
RALGPS1	531.439	-1.99556	0.220676	-9.04293	1.52521e-19	1.82221e-18
PIDD	1328.75	-1.99427	0.167093	-11.9351	7.76616e-33	1.76597e-31
PPL	40.5863	-1.98999	0.334793	-5.94394	2.78258e-09	1.50101e-08
CAPN14	55.07	-1.98973	0.301358	-6.60254	4.04165e-11	2.58027e-10
MYO1H	6.40211	-1.98836	0.671328	-2.96183	0.00305818	0.00737856
LOC100134368	11.0194	-1.98712	0.554475	-3.58378	0.000338657	0.000964076
SULF2	12.9616	-1.98666	0.535428	-3.71041	0.000206925	0.000608846
DQX1	67.2292	-1.98511	0.275488	-7.2058	5.77027e-13	4.27603e-12
LOC101927300	18.3451	-1.98444	0.541867	-3.66223	0.000250031	0.000726589
MFI2-AS1	117.818	-1.98405	0.343203	-5.78097	7.42697e-09	3.85091e-08
KRT1	1102.91	-1.98236	0.263167	-7.53272	4.96931e-14	3.9948e-13
TCF12	3820.7	-1.98094	0.130092	-15.2272	2.33244e-52	9.39959e-51
INPP4A	2158.53	-1.98052	0.0988667	-20.0323	2.88228e-89	2.30806e-87
LGALS4	7.37902	-1.97935	0.649174	-3.04902	0.00229587	0.0056704
EFNA1	97.2116	-1.97927	0.299401	-6.61076	3.82362e-11	2.44612e-10
SLC37A2	48.9567	-1.97663	0.402998	-4.9048	9.35216e-07	3.80851e-06
RP11-439L8.4	82.8999	-1.9766	0.462168	-4.2768	1.89596e-05	6.52766e-05
BAIAP2L2	29.1862	-1.97065	0.447469	-4.40399	1.06279e-05	3.79754e-05
SP7	3.5225	-1.96675	0.756926	-2.59834	0.00936755	0.020479
TBC1D10C	1113.91	-1.96589	0.131177	-14.9865	9.0001e-51	3.47617e-49
SLC7A8	64.7013	-1.96451	0.368034	-5.33786	9.40525e-08	4.28367e-07
KCNH2	1241.61	-1.96373	0.165656	-11.8543	2.0446e-32	4.53277e-31
LOC101928714	19.6427	-1.96365	0.528946	-3.71238	0.000205321	0.000604795
PIANP	277.348	-1.96	0.144019	-13.6093	3.52795e-42	1.0942e-40
LOC101929552	2.7262	-1.95999	0.792286	-2.47384	0.0133668	0.0282769
LINC00928	4.66737	-1.95993	0.731559	-2.67911	0.0073819	0.0164595
SAP25	194.207	-1.95911	0.304677	-6.43012	1.27503e-10	7.74864e-10
SIGLEC9	20.1839	-1.95857	0.459928	-4.25843	2.05865e-05	7.05851e-05
NOS3	276.184	-1.95675	0.194545	-10.0581	8.46191e-24	1.27798e-22
MIR378I	5.58143	-1.95198	0.711024	-2.74532	0.00604527	0.0137314
LOC101926931	15.4721	-1.95143	0.512422	-3.80824	0.00013996	0.000423343
BTN3A2	854.109	-1.9498	0.156388	-12.4677	1.12011e-35	2.82736e-34
JAM3	9492.6	-1.94924	0.271011	-7.19245	6.36376e-13	4.69897e-12
C9orf72	398.417	-1.94791	0.217162	-8.96986	2.96894e-19	3.47117e-18
CD248	16.3219	-1.94748	0.508615	-3.82899	0.000128669	0.000392127
LOC101928054	32.3919	-1.9473	0.368001	-5.29157	1.21272e-07	5.46578e-07
SLC14A1	22.1621	-1.94552	0.604836	-3.21661	0.00129713	0.00335956
LOC102723467	1.80464	-1.94535	0.805178	-2.41605	0.0156901	0.0326453
KRT73-AS1	4.85745	-1.93736	0.750405	-2.58175	0.0098301	0.0214071
SELPLG	800.106	-1.93667	0.11568	-16.7416	6.5174e-63	3.45944e-61
LOC100507103	2.58009	-1.93666	0.793506	-2.44064	0.0146613	0.0307251
BTN3A1	502.762	-1.93655	0.126572	-15.2999	7.65288e-53	3.13852e-51
LOC101927044	7.89724	-1.93595	0.61564	-3.14461	0.00166309	0.00423072
CREB3L1	53.2436	-1.93554	0.300867	-6.4332	1.24945e-10	7.60308e-10
KANK1	87.8724	-1.93398	0.244336	-7.91523	2.468e-15	2.19906e-14
LOC101927098	11.1128	-1.93375	0.591109	-3.2714	0.00107016	0.00281209
RTN4R	138.42	-1.93258	0.243416	-7.93941	2.0314e-15	1.81789e-14
FLT3LG	173.736	-1.9325	0.211162	-9.15175	5.60198e-20	6.83795e-19
SUV420H2	522.406	-1.93249	0.231499	-8.3477	6.96023e-17	6.93335e-16
TTC28-AS1	222.419	-1.93206	0.190043	-10.1664	2.79997e-24	4.33844e-23
CA7	3.49029	-1.93189	0.762157	-2.53477	0.0112523	0.0242202
LRRC27	124.26	-1.9296	0.221009	-8.73087	2.52729e-18	2.80143e-17
TNRC6C	719.215	-1.92819	0.1421	-13.5693	6.08781e-42	1.85713e-40
ESRP1	77.0909	-1.92778	0.248618	-7.75401	8.90347e-15	7.5806e-14
ACSF3	3461.96	-1.92321	0.166046	-11.5824	5.06206e-31	1.0711e-29
RBFOX3	5.24918	-1.92312	0.699737	-2.74835	0.00598956	0.0136132
TGFA	123.7	-1.9213	0.197918	-9.70754	2.8001e-22	3.92309e-21
CXorf65	121.454	-1.92115	0.28091	-6.83904	7.97251e-12	5.39378e-11
PVRIG	435.626	-1.91937	0.138651	-13.8431	1.39992e-43	4.4841e-42
PRDM5	13.9763	-1.91407	0.5052	-3.78873	0.000151419	0.00045526
HILPDA	643.519	-1.912	0.554588	-3.4476	0.000565585	0.00155481
LINC01126	10.7973	-1.90667	0.577924	-3.29916	0.000969741	0.00256782
RASAL1	275.676	-1.90488	0.166618	-11.4326	2.87316e-30	5.87859e-29
C1orf229	2.61683	-1.90466	0.794194	-2.39823	0.0164747	0.0341326
BAI2	559.735	-1.903	0.246942	-7.70629	1.29527e-14	1.08835e-13
LOC102724518	8.31792	-1.90043	0.658633	-2.88541	0.00390902	0.00925354
ACSS1	1315.43	-1.8998	0.10323	-18.4035	1.23074e-75	8.10801e-74
LOC100128076	4.31198	-1.89801	0.73001	-2.59998	0.00932298	0.0203839
B3GNT1	395.635	-1.89588	0.159628	-11.8769	1.56112e-32	3.48169e-31
RHOU	525.373	-1.8943	0.235801	-8.0335	9.47316e-16	8.68241e-15
MAP1A	1119.51	-1.89394	0.126159	-15.0122	6.10438e-51	2.37751e-49
GPR114	6.24999	-1.89367	0.690581	-2.74214	0.00610406	0.0138514
MANBA	326.55	-1.89174	0.172253	-10.9823	4.64865e-28	8.57623e-27
LOC101927803	46.262	-1.89042	0.33045	-5.72074	1.06058e-08	5.41454e-08
ADC	69.2085	-1.88875	0.261293	-7.22848	4.88428e-13	3.6398e-12
TRNAR22	5.29397	-1.88867	0.704044	-2.6826	0.00730524	0.0163023
LOC102723563	2.78439	-1.88815	0.798838	-2.36362	0.0180973	0.0371117
CERCAM	947.226	-1.88791	0.253076	-7.45988	8.65995e-14	6.8549e-13
PCSK4	656.289	-1.88787	0.225791	-8.36118	6.20951e-17	6.20701e-16
LOC101060181	28.8176	-1.88715	0.414746	-4.55015	5.36086e-06	1.99188e-05
RNF166	974.745	-1.88569	0.11036	-17.0867	1.86397e-65	1.0399e-63
MUM1	869.76	-1.88548	0.120421	-15.6574	2.95616e-55	1.31386e-53
CCR9	7.8311	-1.88533	0.634036	-2.97354	0.00294388	0.00712777
AMOT	381.924	-1.88401	0.148637	-12.6752	8.11467e-37	2.11734e-35
LOC374443	115.722	-1.88325	0.222066	-8.48057	2.24085e-17	2.32573e-16
ATP2B4	4502.9	-1.88323	0.105063	-17.9248	7.55754e-72	4.66459e-70
SREBF1	3645.73	-1.88208	0.110345	-17.0563	3.13995e-65	1.73098e-63
RNF168	3274.38	-1.88176	0.134874	-13.952	3.05959e-44	9.9199e-43
RP4-777D9.2	3.39369	-1.87998	0.767253	-2.45028	0.0142746	0.0299878
FAM228A	1.82365	-1.87957	0.803574	-2.33902	0.0193345	0.0393855
MANEA-AS1	11.9768	-1.87936	0.538162	-3.49218	0.000479093	0.00133422
KLLN	120.895	-1.87879	0.246509	-7.62159	2.50567e-14	2.05611e-13
LOC100507412	82.3051	-1.87873	0.253109	-7.42259	1.1485e-13	9.01047e-13
ITGA2B	141.886	-1.87852	0.333534	-5.63216	1.77971e-08	8.86656e-08
BRD3	991.816	-1.87692	0.144794	-12.9627	1.99219e-38	5.47499e-37
LOC100132874	2.61455	-1.87531	0.797016	-2.35292	0.0186269	0.0381029
TRNAA26	4.52169	-1.87197	0.747651	-2.50381	0.0122866	0.0262157
BTBD8	16.2015	-1.8712	0.479141	-3.90533	9.40984e-05	0.000292922
PLCG1	4846.53	-1.87027	0.0837295	-22.337	1.61511e-110	1.78604e-108
HDAC7	2511.31	-1.86932	0.247399	-7.55591	4.15948e-14	3.36416e-13
VWA1	29.7983	-1.86672	0.479581	-3.8924	9.92582e-05	0.000308055
PLEKHH3	325.519	-1.86388	0.297104	-6.27351	3.53008e-10	2.06102e-09
LOC257358	88.4919	-1.86334	0.249919	-7.45577	8.93447e-14	7.05717e-13
ZNF792	112.563	-1.85839	0.223038	-8.33214	7.93947e-17	7.88019e-16
DISC1	6.64056	-1.85788	0.641996	-2.89391	0.00380477	0.00902054
MNX1-AS1	46.3795	-1.85685	0.345192	-5.37918	7.48253e-08	3.45282e-07
LINC00539	75.3467	-1.85475	0.342368	-5.4174	6.04708e-08	2.81914e-07
SLC2A4RG	892.156	-1.85407	0.216839	-8.55044	1.22616e-17	1.30021e-16
LMTK3	169.69	-1.8533	0.22134	-8.37308	5.61332e-17	5.64004e-16
FGFR3	408.568	-1.85288	0.313633	-5.9078	3.46714e-09	1.8552e-08
STOX2	202.193	-1.85165	0.186226	-9.943	2.70549e-23	3.96705e-22
SULT1A1	250.909	-1.84855	0.181271	-10.1977	2.02937e-24	3.16289e-23
CHURC1-FNTB	2.45069	-1.84645	0.79525	-2.32184	0.0202414	0.0410172
NOTCH3	1303.52	-1.84627	0.258593	-7.13968	9.35475e-13	6.83147e-12
DPYSL2	1234.08	-1.84394	0.166816	-11.0537	2.10388e-28	3.94011e-27
CCDC107	160.989	-1.84167	0.179655	-10.2511	1.16977e-24	1.84325e-23
ZIC2	33.1904	-1.84119	0.528585	-3.48325	0.000495357	0.00137457
LINC01089	352.814	-1.84108	0.154743	-11.8976	1.21775e-32	2.74223e-31
HKDC1	8.44399	-1.83601	0.609633	-3.01167	0.00259817	0.00636288
MID1IP1	2083.54	-1.8349	0.199909	-9.17867	4.36452e-20	5.37336e-19
BACE1-AS	19.247	-1.83369	0.438766	-4.1792	2.92539e-05	9.8225e-05
ANXA9	25.9217	-1.83204	0.472253	-3.87937	0.000104728	0.00032384
PTCH1	27.4041	-1.82864	0.392011	-4.66477	3.08969e-06	1.18035e-05
FAM198A	38.4099	-1.82845	0.357864	-5.10935	3.23261e-07	1.3844e-06
LOC101928163	2.45025	-1.82681	0.797369	-2.29105	0.0219606	0.0442354
FANCE	214.215	-1.82628	0.160726	-11.3627	6.41246e-30	1.28929e-28
TRIM7	982.731	-1.82622	0.295587	-6.17828	6.4803e-10	3.69865e-09
LOC100499484-C9ORF174	1.66306	-1.82601	0.802657	-2.27496	0.0229085	0.0459456
LOC101929007	5.26737	-1.8257	0.736585	-2.47859	0.0131901	0.027951
E2F2	2429.13	-1.8247	0.114454	-15.9426	3.20497e-57	1.50358e-55
THEMIS2	162.976	-1.82327	0.183464	-9.93798	2.84541e-23	4.16564e-22
RP11-539L10.2	11.0101	-1.82321	0.6526	-2.79377	0.00520982	0.0119965
ACAD8	1295.69	-1.82158	0.241437	-7.54473	4.53214e-14	3.65602e-13
ZNF514	209.306	-1.82099	0.174958	-10.4082	2.2754e-25	3.72444e-24
ZNF385C	58.1413	-1.82046	0.290642	-6.26356	3.76287e-10	2.19006e-09
SNX32	26.7499	-1.81869	0.423531	-4.29412	1.75384e-05	6.06984e-05
ORAI2	727.257	-1.81736	0.166469	-10.9171	9.55007e-28	1.74284e-26
KCTD1	444.19	-1.81733	0.139001	-13.0742	4.62375e-39	1.29758e-37
SMAD1	254.076	-1.8172	0.170747	-10.6427	1.88675e-26	3.23955e-25
BUB1	3468.59	-1.8172	0.171669	-10.5855	3.48011e-26	5.90442e-25
TNFSF12	5.93646	-1.81696	0.695944	-2.61078	0.00903364	0.0197909
BIRC7	6.19618	-1.81402	0.722846	-2.50956	0.0120883	0.02584
TINAGL1	3.40875	-1.81298	0.778281	-2.32947	0.0198342	0.0402931
ADAM33	6.62964	-1.81163	0.661933	-2.73688	0.00620245	0.0140438
MDK	159.28	-1.81029	0.22676	-7.98329	1.42479e-15	1.29058e-14
RAD21-AS1	16.3804	-1.80987	0.460906	-3.92676	8.60972e-05	0.000269414
RASSF7	27.7939	-1.80813	0.411426	-4.39478	1.10885e-05	3.95323e-05
PRR12	1065.76	-1.8076	0.127522	-14.1748	1.31203e-45	4.4318e-44
ABCA7	1080.06	-1.80741	0.169341	-10.6732	1.359e-26	2.35299e-25
SLC37A4	21.4475	-1.80574	0.429912	-4.20025	2.66624e-05	9.00607e-05
LOC102723959	65.6886	-1.80548	0.273775	-6.59477	4.2593e-11	2.71176e-10
GABARAPL1	665.794	-1.80536	0.203889	-8.85459	8.39914e-19	9.56709e-18
KIAA0586	646.629	-1.80521	0.16339	-11.0485	2.22917e-28	4.16635e-27
SLC6A16	16.576	-1.80503	0.487197	-3.70494	0.000211445	0.000621554
HAGHL	415.787	-1.80462	0.188008	-9.59863	8.10157e-22	1.10507e-20
SLC25A45	215.783	-1.80266	0.173295	-10.4023	2.42072e-25	3.95534e-24
ADAMTS20	11.546	-1.80115	0.54244	-3.32045	0.000898712	0.00239236
NCKIPSD	1023.62	-1.80094	0.23881	-7.54133	4.6521e-14	3.75116e-13
NEFM	16.5514	-1.79814	0.489965	-3.66994	0.000242603	0.000706439
BRICD5	190.325	-1.79702	0.236577	-7.59593	3.05587e-14	2.49876e-13
LOC100507195	1.6385	-1.79582	0.80167	-2.2401	0.0250844	0.0497828
IRX4	1.6385	-1.79582	0.80167	-2.2401	0.0250844	0.0497828
ZFYVE28	29.2362	-1.79488	0.414062	-4.33482	1.45883e-05	5.10782e-05
FBXO16	43.7159	-1.79468	0.334794	-5.36055	8.29705e-08	3.81164e-07
IKZF2	2787.79	-1.79432	0.124162	-14.4515	2.4541e-47	8.70082e-46
PPP1R3E	349.64	-1.7941	0.273389	-6.56245	5.29311e-11	3.3436e-10
TPM2	826.291	-1.79261	0.29857	-6.00399	1.92527e-09	1.05541e-08
CCND3	5678.76	-1.79179	0.172479	-10.3885	2.79822e-25	4.54417e-24
C1orf213	72.4603	-1.79085	0.460421	-3.88959	0.000100414	0.000311539
RP11-163N6.2	5.72977	-1.78954	0.685878	-2.60913	0.00907728	0.0198795
GNB3	242.612	-1.78912	0.26952	-6.63819	3.1755e-11	2.03992e-10
MYO18A	2144.45	-1.78895	0.13906	-12.8646	7.12064e-38	1.90891e-36
HYPK	9.5859	-1.78432	0.65376	-2.72931	0.0063467	0.0143407
TMPRSS5	9.68345	-1.7829	0.571215	-3.12124	0.00180091	0.00454245
CTIF	270.097	-1.78232	0.155552	-11.4581	2.14271e-30	4.41322e-29
LINC00341	91.2861	-1.78135	0.243884	-7.3041	2.79138e-13	2.12099e-12
TTLL11	292.467	-1.78049	0.219434	-8.11403	4.8969e-16	4.5808e-15
LRRC63	15.0931	-1.78048	0.524353	-3.39558	0.00068483	0.0018568
LOC100996273	5.05936	-1.78029	0.741299	-2.40159	0.0163241	0.0338546
PPP1R13L	301.079	-1.77718	0.258938	-6.86333	6.72717e-12	4.5796e-11
ZNF768	208.417	-1.77691	0.200533	-8.86096	7.93297e-19	9.04719e-18
NRTN	42.9731	-1.77674	0.308957	-5.75075	8.8847e-09	4.57356e-08
TRERF1	362.22	-1.77664	0.142936	-12.4296	1.80547e-35	4.53272e-34
IGIP	127.622	-1.77563	0.286285	-6.2023	5.5643e-10	3.20439e-09
MESP1	80.1047	-1.77535	0.281273	-6.31183	2.75764e-10	1.62743e-09
C14orf93	112.629	-1.77277	0.203101	-8.7285	2.58062e-18	2.85884e-17
CDH4-2	41.316	-1.77233	0.354651	-4.99739	5.81113e-07	2.42278e-06
EVA1B	240.72	-1.7716	0.299594	-5.91332	3.3527e-09	1.79552e-08
ZNF496	1836.64	-1.77116	0.114914	-15.4129	1.34082e-53	5.66131e-52
CERKL	235.227	-1.77111	0.181192	-9.77477	1.44488e-22	2.0413e-21
FAM160A1	38.0608	-1.77066	0.435604	-4.06484	4.80649e-05	0.000155729
SLC35E2B	740.86	-1.7702	0.103847	-17.0463	3.72481e-65	2.04732e-63
ILDR1	3.23959	-1.76894	0.777085	-2.27637	0.0228237	0.0457804
CDT1	4672.4	-1.76787	0.221847	-7.96888	1.60124e-15	1.44197e-14
ZNF192P1	31.3572	-1.76772	0.408846	-4.32369	1.53439e-05	5.35999e-05
ADRBK1	5135.09	-1.7648	0.116146	-15.1947	3.83175e-52	1.54083e-50
RBM5-AS1	171.259	-1.76411	0.309139	-5.70652	1.15309e-08	5.84184e-08
PRKCZ	43.0243	-1.76314	0.334904	-5.2646	1.40493e-07	6.28783e-07
ABCB10	2415.75	-1.76288	0.111126	-15.8639	1.12748e-56	5.2366e-55
YBX2	760.175	-1.76134	0.224921	-7.8309	4.84394e-15	4.21502e-14
SCD	14584	-1.76133	0.180935	-9.7346	2.14665e-22	3.02125e-21
PCYT2	829.142	-1.76049	0.117431	-14.9917	8.31908e-51	3.22655e-49
ADAMTS10	528.918	-1.75935	0.146133	-12.0394	2.20545e-33	5.10884e-32
PAX6	1397.18	-1.75866	0.230345	-7.63488	2.26025e-14	1.86295e-13
HSPA4L	449.05	-1.75815	0.119405	-14.7243	4.50365e-49	1.67337e-47
PPARA	530.663	-1.75655	0.145512	-12.0715	1.49303e-33	3.49781e-32
SLC16A3	3206.87	-1.75577	0.191984	-9.14537	5.94257e-20	7.24417e-19
LEPREL4	82.1991	-1.75555	0.253863	-6.91531	4.66828e-12	3.22526e-11
SEMA6B	21.7303	-1.75481	0.502627	-3.49128	0.000480707	0.00133791
RGS14	696.905	-1.75463	0.142726	-12.2937	9.78997e-35	2.38372e-33
AOX1	116.79	-1.7544	0.378498	-4.63517	3.56642e-06	1.35026e-05
LOC149351	37.4046	-1.75415	0.328453	-5.34065	9.26155e-08	4.22132e-07
VANGL1	2337.65	-1.75164	0.188947	-9.27055	1.85191e-20	2.33095e-19
CHST12	883.999	-1.74937	0.119562	-14.6315	1.76924e-48	6.45755e-47
ZNF821	67.9592	-1.74864	0.346858	-5.04137	4.62212e-07	1.94319e-06
SLC2A1-AS1	16.1203	-1.74662	0.549651	-3.1777	0.00148449	0.0038066
C9orf163	7.95804	-1.74609	0.625954	-2.78948	0.00527931	0.012146
LOC644249	6.56014	-1.74606	0.683583	-2.55428	0.0106408	0.0230269
FAM212A	40.7141	-1.74543	0.347954	-5.01627	5.26833e-07	2.2034e-06
TJP2	444.79	-1.74407	0.145601	-11.9784	4.6128e-33	1.05538e-31
RCOR2	308.957	-1.74358	0.227554	-7.66226	1.82684e-14	1.51649e-13
LOC101929641	4.80509	-1.74332	0.717053	-2.43123	0.0150477	0.0314286
SLC17A9	6.57725	-1.74051	0.691017	-2.51877	0.0117766	0.0252173
STMN3	1233.9	-1.73979	0.10643	-16.3468	4.58456e-60	2.28343e-58
ARHGAP23-2	3.80649	-1.73798	0.744743	-2.33366	0.0196133	0.0398967
KLRG1	15.3212	-1.73587	0.512991	-3.38381	0.000714863	0.00193174
LOC102724466	21.0616	-1.73368	0.448867	-3.86235	0.000112301	0.000345821
CFHR3	4.99176	-1.73132	0.74376	-2.32779	0.0199232	0.0404516
SULT1A2	10.5426	-1.73119	0.584479	-2.96194	0.00305712	0.00737695
CDKN1B	1262.43	-1.73077	0.297718	-5.81345	6.11981e-09	3.19994e-08
GCK	21.2692	-1.73002	0.425405	-4.06676	4.76712e-05	0.000154588
DEF6	1588.93	-1.72994	0.0957973	-18.0584	6.77929e-73	4.29848e-71
LGR6	21.693	-1.72821	0.454892	-3.79916	0.00014519	0.000438021
CBX2	1376.78	-1.72723	0.0933009	-18.5125	1.63852e-76	1.09106e-74
LOC100130987	47.9631	-1.72637	0.333324	-5.17927	2.22755e-07	9.73955e-07
HDAC9	30.104	-1.72507	0.368187	-4.68531	2.79539e-06	1.0741e-05
ARID3A	491.184	-1.72385	0.156961	-10.9826	4.6328e-28	8.55549e-27
BCAR3	34.5771	-1.72257	0.336727	-5.11561	3.1272e-07	1.34112e-06
ZFP14	177.517	-1.72182	0.200515	-8.58699	8.92742e-18	9.59801e-17
FLJ22447	4.61697	-1.72079	0.713432	-2.41199	0.0158655	0.0329772
NCRNA00185	4.6794	-1.72036	0.721773	-2.38352	0.0171481	0.0354092
BEND5	352.575	-1.71994	0.296604	-5.79877	6.68019e-09	3.47827e-08
CCM2L	56.9018	-1.71965	0.278392	-6.17708	6.52993e-10	3.72583e-09
RAB44	281.197	-1.71953	0.187129	-9.18897	3.96621e-20	4.89922e-19
NPB	48.2113	-1.71755	0.311936	-5.50609	3.66893e-08	1.76128e-07
MYB	3209.78	-1.71441	0.107243	-15.9862	1.59544e-57	7.54199e-56
ARID5B	342.576	-1.71253	0.176519	-9.70168	2.96565e-22	4.14254e-21
C1QL4	89.881	-1.70877	0.251905	-6.78338	1.17396e-11	7.83678e-11
ZNF563	110.616	-1.70819	0.211775	-8.06602	7.26263e-16	6.70602e-15
LOC101929636	7.02304	-1.7063	0.657907	-2.59352	0.00949977	0.0207387
INPP4B	38.4474	-1.70573	0.404433	-4.21758	2.46937e-05	8.38989e-05
PNMAL2	53.9024	-1.70556	0.317622	-5.36979	7.8828e-08	3.62671e-07
C1QTNF9B	10.2085	-1.70486	0.575456	-2.96263	0.00305026	0.00736136
CECR1	399.943	-1.70075	0.156515	-10.8663	1.66742e-27	2.99298e-26
HNRNPU-AS1	364.098	-1.69933	0.269611	-6.3029	2.92127e-10	1.71908e-09
PLXNB1	917.722	-1.69844	0.102667	-16.5432	1.79205e-61	9.24799e-60
DPEP2	60.4954	-1.69786	0.287727	-5.90095	3.61414e-09	1.93107e-08
LRFN1	328.894	-1.69621	0.151504	-11.1958	4.27612e-29	8.25797e-28
RP4-724E16.2	14.9501	-1.69453	0.518638	-3.26726	0.00108593	0.0028499
HMHA1	4306.87	-1.69391	0.0871912	-19.4276	4.51335e-84	3.2882e-82
PRSS22	23.0114	-1.69369	0.459347	-3.68718	0.000226753	0.000663405
LOC80154	28.5862	-1.69342	0.413698	-4.09337	4.25142e-05	0.000139079
PACSIN1	98.4323	-1.69284	0.263891	-6.41493	1.40888e-10	8.53413e-10
LINC00629	7.02187	-1.69247	0.662903	-2.55313	0.0106761	0.0230924
REPIN1	2071.17	-1.69241	0.115868	-14.6063	2.55876e-48	9.3209e-47
KIAA1958	599.436	-1.69211	0.198975	-8.50412	1.82974e-17	1.90971e-16
SEMA4C	166.839	-1.69182	0.247251	-6.84251	7.78199e-12	5.27257e-11
LOC101926907	7.62677	-1.69069	0.613889	-2.75407	0.00588585	0.0134021
CBY3	15.3516	-1.68914	0.481761	-3.50618	0.000454589	0.00127113
MUSTN1	18.8775	-1.68891	0.464213	-3.63822	0.000274532	0.000792415
TBC1D16	792.543	-1.68815	0.124867	-13.5196	1.19784e-41	3.62434e-40
LOC100506870	37.784	-1.68812	0.323426	-5.21949	1.79415e-07	7.91541e-07
H1FX-AS1	8.45471	-1.68546	0.601001	-2.80442	0.00504069	0.0116432
RP11-973H7.4	77.7584	-1.68479	0.235383	-7.15763	8.2085e-13	6.02757e-12
LOC101927633	5.31096	-1.6843	0.684085	-2.46212	0.013812	0.0291028
PIK3R6	171.587	-1.68399	0.182397	-9.23254	2.64278e-20	3.29957e-19
ZFYVE21	479.015	-1.6839	0.167649	-10.0442	9.74294e-24	1.46562e-22
SEC31B	1058.63	-1.68344	0.177413	-9.48882	2.33665e-21	3.11408e-20
FAM117B	593.005	-1.68294	0.123773	-13.597	4.17344e-42	1.28581e-40
ARMC4	6.20246	-1.68234	0.675515	-2.49046	0.0127579	0.0271465
RP5-1057J7.6	28.7768	-1.67999	0.438742	-3.82911	0.000128609	0.000392009
RP11-399K21.14	7.63682	-1.67841	0.629336	-2.66696	0.00765408	0.0170195
VIPR2	615.942	-1.6784	0.190923	-8.79099	1.48246e-18	1.66714e-17
SLC11A1	15.3683	-1.67834	0.490168	-3.42402	0.000617026	0.00168625
FLJ38122	4.44444	-1.67791	0.71948	-2.33211	0.0196949	0.0400494
TMEM150C	109.33	-1.67757	0.223407	-7.50903	5.95668e-14	4.76176e-13
ADAMTS7	28.1212	-1.67743	0.487519	-3.44076	0.000580092	0.00159069
TRIM2	132.212	-1.6762	0.190992	-8.77628	1.68965e-18	1.89099e-17
WNT2B	32.4609	-1.67573	0.371797	-4.50712	6.57139e-06	2.41558e-05
PPP1R3B	800.223	-1.67144	0.204339	-8.17978	2.84365e-16	2.7092e-15
CYP2S1	121.933	-1.6713	0.198823	-8.40597	4.24331e-17	4.30072e-16
EHBP1L1	1247.36	-1.67031	0.113695	-14.6912	7.34372e-49	2.69096e-47
GPR146	105.285	-1.66935	0.449697	-3.71216	0.000205496	0.000605215
SUGP2	3165.2	-1.66868	0.209906	-7.94969	1.8698e-15	1.67893e-14
LOC102724397	8.98355	-1.66685	0.587004	-2.83958	0.00451726	0.0105588
TERT	541.947	-1.66474	0.140629	-11.8378	2.4887e-32	5.49764e-31
ING4	411.626	-1.66241	0.214508	-7.74986	9.19958e-15	7.8148e-14
SAMD13	88.1082	-1.66202	0.268143	-6.19827	5.70868e-10	3.28042e-09
MXI1	749.808	-1.66165	0.256882	-6.46855	9.89485e-11	6.07089e-10
LOC101929385	17.8906	-1.66153	0.563871	-2.94664	0.00321242	0.00771761
UNC5CL	60.1185	-1.66019	0.369157	-4.49724	6.88401e-06	2.524e-05
KLHL24	533.168	-1.65923	0.321356	-5.16322	2.42743e-07	1.05712e-06
SALL2	507.72	-1.65922	0.117493	-14.1218	2.78789e-45	9.38286e-44
PHF21A	687.595	-1.65796	0.189662	-8.7417	2.29635e-18	2.55153e-17
NTS	16.851	-1.65641	0.577748	-2.86701	0.00414372	0.00976062
POLG	11696.4	-1.6538	0.424118	-3.89938	9.64394e-05	0.000299808
GLRX	788.946	-1.65183	0.113202	-14.5919	3.16452e-48	1.14601e-46
TFAP2A-AS1	181.167	-1.65128	0.290091	-5.69229	1.25348e-08	6.32461e-08
SNPH	222.722	-1.65052	0.190322	-8.67223	4.2373e-18	4.63881e-17
LOC102723354	17.6511	-1.64756	0.487465	-3.37986	0.00072523	0.00195691
MYO18B	4120.76	-1.64741	0.237089	-6.94851	3.69174e-12	2.56489e-11
RBM44	21.4198	-1.64512	0.459308	-3.58173	0.000341324	0.000970711
TCHH	24.7922	-1.64431	0.398007	-4.13136	3.60623e-05	0.000119381
LHX9	5.87231	-1.64399	0.662464	-2.48164	0.0130781	0.0277545
LOC646214	5.11402	-1.64358	0.68411	-2.40251	0.0162831	0.0337808
TTK	2209.68	-1.64193	0.176181	-9.31955	1.16836e-20	1.49181e-19
CTDSPL	539.773	-1.64156	0.118998	-13.7948	2.73771e-43	8.69421e-42
DCAF8	1820.75	-1.64117	0.16874	-9.72605	2.33482e-22	3.28111e-21
SLC35E2	394.719	-1.64032	0.130789	-12.5417	4.41424e-36	1.12803e-34
PBXIP1	784.728	-1.63897	0.152006	-10.7823	4.17371e-27	7.34969e-26
FAM179A	43.996	-1.63881	0.359851	-4.55415	5.25979e-06	1.95667e-05
IGF1R	740.584	-1.63707	0.124544	-13.1445	1.82932e-39	5.21244e-38
USP28	471.571	-1.63648	0.19005	-8.61078	7.25683e-18	7.84734e-17
JAG2	635.485	-1.63586	0.143453	-11.4035	4.01757e-30	8.16612e-29
ZNF385A	339.097	-1.63473	0.152301	-10.7335	7.08625e-27	1.23846e-25
THBS4	4.30101	-1.63376	0.721148	-2.26549	0.0234824	0.0469497
C9orf9	516.312	-1.63332	0.145828	-11.2003	4.0638e-29	7.85612e-28
FGF17	25.0869	-1.63108	0.426063	-3.82826	0.000129054	0.000393236
MEX3A	236.941	-1.631	0.17256	-9.45182	3.32995e-21	4.39062e-20
AGAP3	1052.63	-1.62839	0.115511	-14.0972	3.94903e-45	1.31715e-43
TMEM173	660.922	-1.62835	0.105666	-15.4104	1.39341e-53	5.85676e-52
SERF2-C15ORF63	7.11158	-1.6278	0.688598	-2.36393	0.0180821	0.0370906
MTRNR2L8	7.86172	-1.62669	0.657966	-2.47229	0.0134249	0.0283804
PRRT4	476.453	-1.62575	0.142197	-11.433	2.85934e-30	5.86322e-29
ZNF217	1880.11	-1.6256	0.143398	-11.3363	8.67112e-30	1.73217e-28
DOC2GP	36.2681	-1.62554	0.413058	-3.93538	8.30645e-05	0.000260495
HRASLS5	27.802	-1.62516	0.418466	-3.88362	0.000102912	0.00031865
VWDE	228.682	-1.62513	0.206338	-7.87603	3.37946e-15	2.97552e-14
NMT2	460.62	-1.62509	0.197305	-8.23647	1.7737e-16	1.71892e-15
MED12L	1016.79	-1.62446	0.133194	-12.1962	3.25676e-34	7.79692e-33
MECOM	6.99842	-1.62345	0.696342	-2.3314	0.0197325	0.0401128
ZNF8	29.7687	-1.62336	0.458365	-3.54164	0.000397647	0.00111999
S100A9	6.36841	-1.62266	0.717535	-2.26144	0.0237323	0.0473958
LOC102724450	10.3565	-1.62155	0.547893	-2.95961	0.00308034	0.00742643
AFF2	1297.95	-1.62153	0.112723	-14.3851	6.41679e-47	2.25352e-45
CD300A	28.7071	-1.62122	0.383193	-4.23083	2.32831e-05	7.93675e-05
ZNF367	846.245	-1.61769	0.141751	-11.4122	3.63504e-30	7.4048e-29
ZRANB3	220.245	-1.61521	0.171599	-9.4127	4.83552e-21	6.29975e-20
DTL	2469.37	-1.6151	0.116661	-13.8444	1.37608e-43	4.41535e-42
DNMT3B	280.48	-1.61476	0.205219	-7.86847	3.59014e-15	3.14909e-14
SERINC4	182.617	-1.61427	0.340115	-4.74625	2.07225e-06	8.06921e-06
ENGASE	764.829	-1.61371	0.151297	-10.6658	1.47092e-26	2.54202e-25
USP44	863.364	-1.61333	0.115084	-14.0188	1.19686e-44	3.94241e-43
ENHO	107.33	-1.61326	0.219362	-7.35434	1.91875e-13	1.4785e-12
INPPL1	1284.75	-1.61225	0.166117	-9.70552	2.85619e-22	3.99867e-21
RNF17	9.1758	-1.61204	0.6181	-2.60805	0.00910586	0.0199335
SOX11	243.837	-1.61132	0.175376	-9.18784	4.00794e-20	4.94419e-19
PCOLCE	367.597	-1.61132	0.213175	-7.55866	4.07243e-14	3.29806e-13
ICAM4	181.661	-1.61127	0.178597	-9.02184	1.84959e-19	2.19283e-18
GTSE1-AS1	25.7288	-1.61115	0.455271	-3.53889	0.000401816	0.00113071
SPEF2	40.3686	-1.60814	0.378443	-4.24936	2.14384e-05	7.33621e-05
CD72	503.091	-1.60738	0.300118	-5.35581	8.51734e-08	3.90126e-07
LOC101927018	17.2031	-1.60654	0.475914	-3.37569	0.000736314	0.00198509
RASSF1-AS1	6.12144	-1.60495	0.68954	-2.32757	0.0199351	0.0404714
LOC101929732	9.50501	-1.60476	0.572041	-2.80532	0.0050266	0.0116178
FOXB1	55.6926	-1.60343	0.334365	-4.79545	1.62313e-06	6.41584e-06
TTC9C	477.088	-1.60264	0.1717	-9.33397	1.01977e-20	1.30567e-19
PLEKHG3	12.5041	-1.6026	0.559662	-2.86351	0.00418976	0.00986032
KIF17	9.45082	-1.60206	0.573725	-2.79239	0.0052321	0.0120463
ANO5	69.4894	-1.60062	0.249607	-6.41256	1.43099e-10	8.66242e-10
TREX1	363.99	-1.59808	0.137107	-11.6558	2.14483e-31	4.60655e-30
SPC24	364.389	-1.59667	0.219719	-7.26687	3.67902e-13	2.76828e-12
CD28	2274.95	-1.59662	0.0815287	-19.5835	2.13834e-85	1.58904e-83
PAPLN	247.872	-1.59629	0.165549	-9.64239	5.29419e-22	7.30723e-21
CHEK2	662.928	-1.59404	0.147724	-10.7907	3.81048e-27	6.71642e-26
DAPK1	192.323	-1.59316	0.277195	-5.74742	9.06142e-09	4.65551e-08
LOC101060391	635.382	-1.59297	0.306224	-5.20197	1.97183e-07	8.6643e-07
SOX12	936.994	-1.59296	0.104052	-15.3093	6.6285e-53	2.72443e-51
TCP10L	9.79904	-1.59215	0.612054	-2.60132	0.00928662	0.0203129
C10orf10	6.4742	-1.59197	0.654646	-2.4318	0.0150241	0.0313826
NARFL	1138.45	-1.59169	0.140468	-11.3313	9.1796e-30	1.82785e-28
TRAT1	60.3059	-1.59132	0.405456	-3.92478	8.68095e-05	0.000271506
IQGAP2	3039.26	-1.58963	0.0961575	-16.5316	2.17374e-61	1.11557e-59
TRIM3	231.668	-1.58889	0.16796	-9.45989	3.08272e-21	4.06753e-20
ADCY7	1738.47	-1.58888	0.141203	-11.2525	2.25127e-29	4.41182e-28
MYO1G	4420.11	-1.5884	0.0998264	-15.9116	5.26258e-57	2.46267e-55
SIPA1	1218.46	-1.58835	0.104284	-15.231	2.2028e-52	8.89643e-51
LRRC34	154.403	-1.58483	0.187632	-8.44652	3.00118e-17	3.08044e-16
EID2B	65.7169	-1.58306	0.291305	-5.43439	5.49844e-08	2.58085e-07
SLC52A1	66.4869	-1.58155	0.248584	-6.36224	1.98832e-10	1.18737e-09
DCST2	9.96572	-1.58142	0.638079	-2.47841	0.0131968	0.0279587
DUSP9	39.7923	-1.5806	0.365473	-4.32481	1.52664e-05	5.3342e-05
LINC00884	7.24483	-1.58051	0.653729	-2.41768	0.0156197	0.0325098
NRN1	6377.84	-1.57925	0.466864	-3.38268	0.000717832	0.00193844
ACAD11	44.0321	-1.57826	0.340142	-4.64	3.48406e-06	1.32177e-05
GRK6	2554.02	-1.57817	0.0980704	-16.0922	2.89499e-58	1.37905e-56
LOC100507336	9.5185	-1.57705	0.584451	-2.69834	0.00696855	0.015611
C6orf201	28.1103	-1.57689	0.407031	-3.87412	0.000107012	0.000330573
EIF1B-AS1	11.4499	-1.57681	0.526439	-2.99524	0.00274229	0.00667798
ZBBX	22.3899	-1.57526	0.400838	-3.92993	8.49705e-05	0.000266023
FGF14-AS2	81.8427	-1.5751	0.23813	-6.61443	3.72985e-11	2.38695e-10
LOC101928189	42.8215	-1.57333	0.408256	-3.85379	0.000116306	0.000356968
CASC15	107.621	-1.57316	0.222153	-7.08145	1.42652e-12	1.02403e-11
LOC100506047	8.39245	-1.57221	0.650574	-2.41666	0.0156638	0.0325944
B4GALNT4	470.745	-1.56982	0.174416	-9.00044	2.24821e-19	2.64853e-18
TMUB1	1754.47	-1.56922	0.119796	-13.0991	3.33009e-39	9.38792e-38
LRRC37B	236.642	-1.56853	0.203982	-7.68953	1.47674e-14	1.23469e-13
GNAZ	28.606	-1.56746	0.412591	-3.79907	0.00014524	0.000438102
PYHIN1	258.209	-1.56683	0.15211	-10.3006	7.00089e-25	1.1145e-23
C19orf54	629.066	-1.56671	0.138977	-11.2732	1.78021e-29	3.50718e-28
MYO5C	45.0233	-1.56466	0.317031	-4.93536	8.00021e-07	3.28896e-06
FAM117A	617.553	-1.56464	0.139948	-11.1802	5.09701e-29	9.76209e-28
SMAD9	14.2848	-1.56434	0.488485	-3.20243	0.00136274	0.00351577
ARL3	600.589	-1.56368	0.129078	-12.1142	8.8806e-34	2.10707e-32
DFFB	353.783	-1.56274	0.15115	-10.339	4.69387e-25	7.54349e-24
GOLGA8N-2	12.3019	-1.56251	0.519186	-3.00954	0.00261645	0.00639836
LOC100131347	10.9085	-1.56217	0.556097	-2.80917	0.00496689	0.0114984
ANKRD44	391.005	-1.56151	0.129381	-12.0691	1.53882e-33	3.596e-32
DNAJC22	7.76133	-1.56047	0.613844	-2.54214	0.0110177	0.0237677
ITGB3	463.853	-1.5604	0.139449	-11.1898	4.5767e-29	8.81097e-28
SPECC1	77.4415	-1.55942	0.266012	-5.86221	4.56746e-09	2.42095e-08
ONECUT2	243.591	-1.55893	0.171879	-9.06994	1.1908e-19	1.42819e-18
SH2D1A	2888.16	-1.55809	0.121113	-12.8647	7.10752e-38	1.90814e-36
ADAMTS7P1	29.6202	-1.55787	0.3763	-4.13997	3.47345e-05	0.000115293
NKX2-1	360.276	-1.55782	0.223493	-6.97033	3.16192e-12	2.21084e-11
SMO	613.125	-1.55761	0.107153	-14.5363	7.13618e-48	2.5693e-46
GTF2IRD1	310.721	-1.55729	0.172369	-9.03466	1.64516e-19	1.95796e-18
HYLS1	244.717	-1.55666	0.152422	-10.2129	1.73624e-24	2.71972e-23
LOC100506127	46.1581	-1.55578	0.297575	-5.22821	1.71162e-07	7.56568e-07
DDB2	1210.06	-1.55528	0.213054	-7.29994	2.87906e-13	2.18315e-12
CYP3A5	8.39437	-1.55517	0.599928	-2.59227	0.00953458	0.0208088
PDE1B	493.911	-1.55205	0.146486	-10.5952	3.13631e-26	5.34553e-25
C7orf61	11.1006	-1.55043	0.59005	-2.62763	0.00859823	0.018933
SLC9A3R1	3559.87	-1.54909	0.0904825	-17.1203	1.04678e-65	5.87525e-64
ZNRF1	3261.79	-1.54843	0.0837884	-18.4802	2.97927e-76	1.97674e-74
FBXO36	154.579	-1.5482	0.237426	-6.52076	6.99507e-11	4.36089e-10
NEIL3	1033.08	-1.54793	0.184547	-8.38774	4.95581e-17	4.99561e-16
THY1	430.948	-1.54785	0.161479	-9.58542	9.20792e-22	1.25414e-20
PML	1286.34	-1.54782	0.101469	-15.2542	1.54456e-52	6.26526e-51
GIMAP6	900.443	-1.5477	0.139681	-11.0803	1.56404e-28	2.94694e-27
LOC644656	19.5886	-1.54749	0.468688	-3.30174	0.00096087	0.00254651
MPZL2	17.4345	-1.54738	0.57658	-2.68373	0.00728065	0.0162533
HPS4	1520.33	-1.54735	0.129677	-11.9323	8.03513e-33	1.82267e-31
PRSS30P	180.651	-1.5464	0.282444	-5.47506	4.37369e-08	2.08185e-07
SYNPO	19.2789	-1.54634	0.441763	-3.50038	0.000464591	0.00129558
DNAI1	5.61269	-1.54579	0.689771	-2.24102	0.0250247	0.0496803
IGLL1	14.7343	-1.54559	0.540531	-2.85939	0.00424451	0.009974
TINCR	18.5013	-1.54512	0.608038	-2.54117	0.0110484	0.0238172
CREBZF	1757.8	-1.54466	0.189879	-8.13496	4.12067e-16	3.87027e-15
LIMS2	488.004	-1.54449	0.220941	-6.99052	2.73869e-12	1.92434e-11
RPH3AL	8.66504	-1.54391	0.607384	-2.54191	0.011025	0.0237751
AC074286.1	27.9239	-1.54239	0.388034	-3.97489	7.04107e-05	0.000222692
PDE11A	28.0826	-1.54194	0.430582	-3.58107	0.000342185	0.000972929
DOC2A	156.698	-1.5417	0.228046	-6.76049	1.37529e-11	9.13159e-11
SESN3	1332.15	-1.53992	0.226403	-6.80169	1.03398e-11	6.93975e-11
PLIN1	17.5763	-1.53967	0.496797	-3.0992	0.00194046	0.00486242
ZNF516	237.582	-1.53943	0.197895	-7.77901	7.30916e-15	6.27784e-14
BCORP1	357.67	-1.53858	0.164434	-9.35681	8.21791e-21	1.05583e-19
C14orf159	426.123	-1.53824	0.127438	-12.0705	1.51237e-33	3.53863e-32
MAPK13	38.0538	-1.53757	0.387727	-3.96559	7.32144e-05	0.000231087
BZRAP1	7225.47	-1.53742	0.197165	-7.79762	6.30878e-15	5.4463e-14
SCAI	1035.94	-1.53713	0.202537	-7.58939	3.21423e-14	2.62479e-13
NME9	14.8151	-1.53712	0.501347	-3.06597	0.00216962	0.00539083
DGKZ	2551.51	-1.53655	0.0993628	-15.464	6.06904e-54	2.60394e-52
ZNF831	80.6193	-1.53544	0.299759	-5.12223	3.01936e-07	1.29756e-06
LDB1	1617.17	-1.53508	0.10372	-14.8002	1.46103e-49	5.50569e-48
ELOVL6	190.011	-1.53445	0.211369	-7.25956	3.88364e-13	2.91281e-12
NCR2	12.7848	-1.53361	0.527938	-2.90491	0.00367364	0.00873419
KCNQ4	6.281	-1.53358	0.647057	-2.37008	0.0177843	0.0365605
CACNA1H	741.027	-1.5314	0.145716	-10.5095	7.80758e-26	1.30206e-24
GAL3ST4	138.684	-1.53105	0.187671	-8.15815	3.40197e-16	3.21802e-15
ZNF763	26.3575	-1.53058	0.381071	-4.01652	5.90647e-05	0.00018867
SBSPON	6.5935	-1.53026	0.67674	-2.26122	0.0237455	0.0474145
MVB12B	554.636	-1.52984	0.135462	-11.2934	1.41384e-29	2.79726e-28
ANKRD20A19P	90.2562	-1.52853	0.331186	-4.61531	3.92509e-06	1.48002e-05
SPIN4	567.347	-1.52793	0.128586	-11.8826	1.45751e-32	3.26237e-31
HDAC4	1860.99	-1.52788	0.109775	-13.9183	4.90477e-44	1.58471e-42
RMI2	279.873	-1.52694	0.236189	-6.46491	1.01358e-10	6.21254e-10
MMP15	215.955	-1.52669	0.171553	-8.89922	5.62416e-19	6.4697e-18
LPCAT4	718.405	-1.52594	0.246118	-6.20003	5.64521e-10	3.24796e-09
ASIC1	825.772	-1.52533	0.113639	-13.4225	4.46249e-41	1.32859e-39
GNRH1	66.1417	-1.52468	0.475675	-3.2053	0.00134923	0.00348381
CDKN2C	2173.05	-1.52248	0.14288	-10.6556	1.64143e-26	2.82617e-25
NBEAL2	3910.38	-1.51984	0.0842638	-18.0367	1.00323e-72	6.29663e-71
LOC100128568	17.2469	-1.51811	0.510073	-2.97626	0.00291786	0.00707122
RIC3	6.48047	-1.51519	0.674454	-2.24655	0.0246687	0.0490208
ORC1	820.436	-1.51494	0.127599	-11.8726	1.64298e-32	3.65986e-31
PLCB2	844.283	-1.51427	0.10257	-14.7633	2.52777e-49	9.46792e-48
S100B	7.10675	-1.51367	0.661044	-2.28983	0.0220314	0.0443637
LOC101927070	63.8547	-1.51351	0.279693	-5.41133	6.25585e-08	2.91208e-07
EFNA4	110.121	-1.51336	0.205234	-7.37384	1.65782e-13	1.28169e-12
KIAA1107	72.1125	-1.51308	0.249736	-6.05872	1.37206e-09	7.60671e-09
LOC100289230	20.808	-1.51293	0.512409	-2.95259	0.00315119	0.00758327
TRAF3IP3	1344.5	-1.51292	0.0982241	-15.4028	1.56771e-53	6.57448e-52
FHL1	656.956	-1.51201	0.123456	-12.2474	1.73479e-34	4.19103e-33
WNT1	64.7253	-1.51096	0.317511	-4.75875	1.94792e-06	7.61223e-06
TUB	1271.72	-1.50944	0.127164	-11.8701	1.69317e-32	3.76266e-31
LOC102724797	8.98495	-1.5094	0.612532	-2.4642	0.013732	0.0289539
ZNF862	534.094	-1.50812	0.129857	-11.6137	3.50953e-31	7.45142e-30
SH3TC1	876.244	-1.50698	0.101892	-14.7901	1.69781e-49	6.38499e-48
NECAB3	290.035	-1.50449	0.157158	-9.57309	1.03754e-21	1.40799e-20
ATP2A3	8862.56	-1.50366	0.0785115	-19.1521	9.29511e-82	6.54108e-80
CACNB3	763.785	-1.50283	0.138076	-10.884	1.37372e-27	2.47536e-26
AC007246.3	29.3248	-1.5014	0.371509	-4.04134	5.31458e-05	0.000171176
CCNG2	959.291	-1.49926	0.280357	-5.34769	8.90858e-08	4.07143e-07
KIAA0319L	478.19	-1.4992	0.152182	-9.85137	6.76163e-23	9.7605e-22
CIT	1690.4	-1.49917	0.251367	-5.96409	2.46005e-09	1.33752e-08
RIMKLA	526.108	-1.49837	0.137502	-10.8971	1.19045e-27	2.15138e-26
ASTN2	94.3919	-1.49819	0.208715	-7.17816	7.06535e-13	5.20874e-12
PACSIN3	445.304	-1.49726	0.124469	-12.0292	2.49684e-33	5.76944e-32
NXN	282.076	-1.49701	0.200736	-7.45763	8.80946e-14	6.96435e-13
PYROXD2	68.1469	-1.49585	0.256012	-5.84289	5.13044e-09	2.70931e-08
ITGA4	7744.49	-1.49541	0.144766	-10.3298	5.16455e-25	8.27844e-24
CD247	1568.67	-1.49458	0.125678	-11.8922	1.29973e-32	2.91624e-31
DIP2A	1530.44	-1.49274	0.184889	-8.07369	6.82045e-16	6.304e-15
SMIM14	107.469	-1.49176	0.220147	-6.77621	1.23365e-11	8.22347e-11
LRRC10B	82.2108	-1.49121	0.321772	-4.63439	3.57998e-06	1.35484e-05
EFHC2	11.0273	-1.49112	0.541858	-2.75186	0.0059258	0.0134781
DDX11-AS1	13.5201	-1.49056	0.53953	-2.76269	0.00573264	0.0130833
ZNF184	453.316	-1.49027	0.139757	-10.6633	1.51148e-26	2.6097e-25
LOC102724368	8.34697	-1.49023	0.609536	-2.44487	0.0144906	0.0304016
GSTT1	7.52461	-1.48966	0.637977	-2.33498	0.0195445	0.0397697
BCL11A	604.575	-1.4889	0.137577	-10.8223	2.69983e-27	4.80436e-26
PRORSD1P	20.4414	-1.48818	0.466307	-3.19143	0.00141572	0.0036393
PTPRCAP	1284.62	-1.48757	0.127952	-11.626	3.04025e-31	6.49215e-30
PPP1R32	80.3175	-1.48552	0.416395	-3.56757	0.000360301	0.00102053
SCARF2	36.9597	-1.48473	0.417916	-3.5527	0.000381297	0.00107705
NAALAD2	22.8181	-1.48329	0.408859	-3.62789	0.000285752	0.000822035
APAF1	609.313	-1.48287	0.162519	-9.12425	7.22368e-20	8.75989e-19
PIEZO1	3752.11	-1.48071	0.128553	-11.5184	1.0663e-30	2.2384e-29
RGS9BP	11.6785	-1.48015	0.535346	-2.76484	0.00569505	0.0130027
LRSAM1	470.78	-1.47971	0.114199	-12.9573	2.13754e-38	5.86577e-37
GXYLT2	405.286	-1.47878	0.187797	-7.87438	3.42434e-15	3.01218e-14
PDE3B	2009.48	-1.47614	0.130005	-11.3545	7.04475e-30	1.41336e-28
SLIT1	970.4	-1.47613	0.129095	-11.4344	2.81476e-30	5.77819e-29
2022-09-03	672.028	-1.47588	0.147814	-9.98474	1.77759e-23	2.62513e-22
KIAA1549	703.295	-1.47518	0.170245	-8.66504	4.51372e-18	4.9298e-17
CYP46A1	28.4178	-1.47454	0.37263	-3.9571	7.58646e-05	0.000239086
EPHA10	204.037	-1.47418	0.167734	-8.78879	1.51179e-18	1.69602e-17
TNNT3	28.0023	-1.47257	0.629301	-2.34	0.0192836	0.0393034
NHLRC4	6.69521	-1.47242	0.63303	-2.32598	0.0200194	0.040616
JAKMIP1	1094.85	-1.47198	0.097422	-15.1094	1.40505e-51	5.55384e-50
ANO8	848.445	-1.47114	0.133472	-11.0221	2.9894e-28	5.55927e-27
LGALS9B	14.5682	-1.47107	0.543061	-2.70884	0.00675186	0.0151658
LOC101928965	23.8125	-1.47072	0.43509	-3.38027	0.000724138	0.00195453
LOC102724562	41.8446	-1.4697	0.391389	-3.75508	0.000173284	0.00051715
CARHSP1	2515.27	-1.46886	0.138873	-10.577	3.80915e-26	6.43917e-25
MICA-3	13.4885	-1.46816	0.486838	-3.01571	0.00256377	0.00628442
CLK3	1289.13	-1.46659	0.297373	-4.93181	8.14704e-07	3.34562e-06
UNC13D	1219.75	-1.466	0.165343	-8.86646	7.55091e-19	8.63798e-18
FBXL20	363.76	-1.46557	0.179572	-8.16146	3.30989e-16	3.1357e-15
POMT1	1114.95	-1.46529	0.131496	-11.1433	7.72345e-29	1.47015e-27
ABLIM1	3010	-1.46496	0.188077	-7.78913	6.74714e-15	5.81393e-14
TMEM86B	369.209	-1.4647	0.13244	-11.0593	1.97598e-28	3.70432e-27
ESPNL	42.392	-1.46439	0.340498	-4.30074	1.70231e-05	5.9036e-05
MAP3K14-AS1	234.354	-1.46422	0.154679	-9.46614	2.90376e-21	3.84231e-20
FLVCR1-AS1	10.1474	-1.463	0.559907	-2.61293	0.00897704	0.0196808
FBXO43	165.029	-1.46091	0.261043	-5.59643	2.18812e-08	1.07913e-07
CLEC4A	62.2701	-1.46055	0.373356	-3.91195	9.15551e-05	0.000285627
TOX	1805.13	-1.45978	0.150094	-9.72579	2.34084e-22	3.28709e-21
EPN3	6.52995	-1.45965	0.631619	-2.31096	0.0208349	0.0421279
ATP8B3	615.861	-1.45891	0.204555	-7.1321	9.88467e-13	7.19583e-12
LOC100630918	55.0491	-1.45878	0.314216	-4.64261	3.44038e-06	1.30573e-05
ACRBP	23.258	-1.45838	0.406509	-3.58758	0.000333758	0.000950859
TXK	19.627	-1.4571	0.422754	-3.44668	0.000567513	0.00155942
THEM6	468.554	-1.45625	0.127544	-11.4176	3.41383e-30	6.96182e-29
C11orf45	77.138	-1.45544	0.25254	-5.76321	8.25292e-09	4.26015e-08
PPM1E	62.1623	-1.45487	0.261132	-5.57138	2.52732e-08	1.23787e-07
PCP2	51.3229	-1.45402	0.410138	-3.54519	0.00039233	0.00110619
BUB1B	2985.47	-1.45363	0.187659	-7.74611	9.4748e-15	8.04492e-14
ADD3	2713.15	-1.45183	0.188591	-7.69831	1.37878e-14	1.15591e-13
CCDC114	187.159	-1.44835	0.290154	-4.99164	5.98673e-07	2.49264e-06
C19orf68	285.826	-1.44823	0.216643	-6.6849	2.31078e-11	1.50209e-10
RARRES2	23.7063	-1.44774	0.427987	-3.38266	0.000717862	0.00193844
NUDT7	162.203	-1.44589	0.174838	-8.2699	1.34068e-16	1.31022e-15
KDM3A	2548.1	-1.44574	0.251488	-5.74875	8.99082e-09	4.62307e-08
PCAT18	66.9183	-1.4451	0.287781	-5.02154	5.12583e-07	2.14622e-06
LOC100128494	25.6595	-1.44246	0.550562	-2.61998	0.00879358	0.0193311
SYNE3	220.697	-1.44154	0.239608	-6.01624	1.78517e-09	9.80919e-09
CDH26	9.66032	-1.44151	0.596719	-2.41573	0.0157039	0.0326703
COG4	714.804	-1.44053	0.121536	-11.8527	2.0838e-32	4.61416e-31
KCNQ5	132.021	-1.43929	0.306398	-4.69743	2.63452e-06	1.01544e-05
LINC00263	42.2376	-1.43882	0.429205	-3.35229	0.000801465	0.00214889
PPP1R35	718.632	-1.43725	0.112263	-12.8026	1.58616e-37	4.21568e-36
KIF5A	296.269	-1.43522	0.135979	-10.5547	4.83354e-26	8.11179e-25
S100Z	31.25	-1.43512	0.398736	-3.59918	0.000319225	0.000910992
CREB3L4	140.833	-1.43477	0.194479	-7.37754	1.61243e-13	1.24816e-12
TLR9	26.6211	-1.43317	0.40033	-3.57998	0.000343615	0.000976694
SLC25A35	109.674	-1.43297	0.23082	-6.20815	5.3613e-10	3.09131e-09
GPC2	252.978	-1.43212	0.157147	-9.11325	7.99483e-20	9.66349e-19
LOC102724757	9.88757	-1.43188	0.55422	-2.58359	0.0097777	0.0213004
IKZF1	4501.5	-1.43171	0.0883117	-16.212	4.14654e-59	2.01661e-57
LOC102724827	11.9755	-1.43049	0.52509	-2.72428	0.00644411	0.0145307
RAET1K	44.396	-1.4298	0.376585	-3.79675	0.000146608	0.000441869
URAHP	12.6146	-1.42836	0.508147	-2.81092	0.00493996	0.0114432
PHF7	327.867	-1.42796	0.17093	-8.35403	6.59705e-17	6.58217e-16
ITGA5	2183.2	-1.4273	0.232278	-6.14479	8.00713e-10	4.5256e-09
PHF12	1065.54	-1.42724	0.115938	-12.3103	7.96836e-35	1.94273e-33
IQSEC1	368.232	-1.42597	0.161585	-8.82489	1.09572e-18	1.24124e-17
LOC102724965	10.976	-1.42568	0.5827	-2.44667	0.0144182	0.0302565
TMEM9	601.058	-1.4238	0.166327	-8.56021	1.12665e-17	1.20016e-16
ABHD4	407.719	-1.42228	0.192693	-7.38102	1.57077e-13	1.21642e-12
LPAR2	310.737	-1.42083	0.219414	-6.47555	9.44698e-11	5.80953e-10
EVPL	741.452	-1.41988	0.16955	-8.3744	5.55048e-17	5.58294e-16
CD1B	216.671	-1.41938	0.191841	-7.3987	1.37526e-13	1.07036e-12
FAM193B	1588.59	-1.41928	0.184638	-7.6868	1.50858e-14	1.26018e-13
FAM49A	253.356	-1.41912	0.230479	-6.15725	7.40192e-10	4.19887e-09
FAM63A	101.419	-1.41897	0.275496	-5.15061	2.59643e-07	1.12623e-06
MDFI	642.51	-1.41845	0.126131	-11.2459	2.42736e-29	4.7419e-28
KRT2	19.4735	-1.41798	0.441231	-3.2137	0.00131038	0.0033915
NPM2	43.1754	-1.41704	0.30853	-4.59286	4.37211e-06	1.64091e-05
GIMAP2	1191.91	-1.41556	0.160444	-8.82274	1.11693e-18	1.26449e-17
SLC48A1	549.349	-1.41532	0.168306	-8.40922	4.12738e-17	4.18779e-16
RNF44	1803.87	-1.41495	0.113262	-12.4927	8.18204e-36	2.07658e-34
FAM45A	211.959	-1.41491	0.15078	-9.38391	6.35702e-21	8.22429e-20
C21orf58	850.704	-1.41406	0.140529	-10.0624	8.09822e-24	1.22416e-22
HESX1	49.511	-1.4138	0.286743	-4.93054	8.20033e-07	3.36453e-06
TUBB4A	1575.66	-1.4116	0.0905304	-15.5925	8.18373e-55	3.59426e-53
STAMBPL1	1539.62	-1.41132	0.175442	-8.04438	8.66843e-16	7.97238e-15
C3orf18	140.869	-1.41062	0.189787	-7.43267	1.06429e-13	8.37458e-13
ADAM22	247.562	-1.41052	0.152885	-9.22602	2.80876e-20	3.50208e-19
UNC119	592.457	-1.40974	0.145628	-9.6804	3.65271e-22	5.07175e-21
MAP3K12	347.833	-1.40918	0.134306	-10.4924	9.36533e-26	1.55765e-24
ADAMTS15	38.1644	-1.40802	0.492174	-2.86082	0.00422546	0.00993679
GLB1L3	1673.94	-1.40786	0.204901	-6.87095	6.3775e-12	4.34315e-11
ASAP2	27.7401	-1.40762	0.420675	-3.3461	0.000819556	0.00219517
RTN4RL1	242.084	-1.40636	0.149429	-9.41153	4.88962e-21	6.36576e-20
CCDC154	13.8329	-1.4061	0.484002	-2.90515	0.00367073	0.00872949
CDC42BPB	122.027	-1.40555	0.219484	-6.40391	1.51447e-10	9.15287e-10
ALPK1	239.916	-1.40539	0.207128	-6.78512	1.15992e-11	7.74867e-11
LOC102723775	11.1915	-1.40484	0.528083	-2.66026	0.00780797	0.0173222
MINK1	1122.63	-1.40428	0.128856	-10.898	1.1778e-27	2.13059e-26
ANGPTL4	36.7017	-1.40405	0.375565	-3.7385	0.000185123	0.000550361
CDCA7L	2868.88	-1.40393	0.126117	-11.132	8.76897e-29	1.66235e-27
VASH2	321.504	-1.40308	0.190063	-7.38219	1.55706e-13	1.2068e-12
PM20D2	1570.9	-1.40303	0.120123	-11.6799	1.61396e-31	3.47441e-30
RNF213	3103.29	-1.40266	0.187807	-7.46864	8.10301e-14	6.43048e-13
CCDC136	556.402	-1.402	0.140173	-10.0019	1.495e-23	2.22193e-22
LOC101929004	38.2555	-1.40165	0.32162	-4.35811	1.31193e-05	4.62575e-05
JUP	165.817	-1.40102	0.212189	-6.6027	4.03727e-11	2.57835e-10
CCDC61	211.031	-1.40029	0.219995	-6.3651	1.95164e-10	1.16697e-09
ACPL2	832.714	-1.39973	0.169956	-8.23584	1.78301e-16	1.72705e-15
INSIG2	573.198	-1.39971	0.204532	-6.84348	7.72903e-12	5.23859e-11
LOC100506060	64.6083	-1.39944	0.345647	-4.04875	5.14918e-05	0.000166053
VLDLR	805.551	-1.39726	0.187435	-7.4546	9.01376e-14	7.11677e-13
POC1A	917.954	-1.39597	0.109562	-12.7414	3.48212e-37	9.16301e-36
CENPJ	771.216	-1.39569	0.131548	-10.6097	2.68487e-26	4.58031e-25
LOC100272217	11.5942	-1.39531	0.513835	-2.71549	0.00661786	0.01489
SLC24A5	14.4471	-1.39478	0.596183	-2.33951	0.0193091	0.0393468
PXN-AS1	44.7583	-1.3946	0.343526	-4.05965	4.91456e-05	0.000159119
ZBTB25	392.21	-1.39447	0.285133	-4.89059	1.00535e-06	4.06913e-06
WIPF1	768.584	-1.39435	0.110343	-12.6365	1.32783e-36	3.43571e-35
MCM3AP-AS1	95.6437	-1.39328	0.238821	-5.83401	5.41118e-09	2.84784e-08
LINC00910	22.3585	-1.3927	0.418083	-3.33117	0.000864828	0.00230811
DNTT	137.634	-1.39246	0.361667	-3.8501	0.000118068	0.000361958
TMEM184A	115.303	-1.39044	0.256096	-5.42939	5.65476e-08	2.65088e-07
BCL2L2	27.714	-1.39027	0.361857	-3.84205	0.00012201	0.000372934
LINC01120	15.915	-1.38807	0.56346	-2.46347	0.0137598	0.0290059
KANSL1L	90.3968	-1.38719	0.347099	-3.99653	6.4277e-05	0.000204336
PLCD1	159.657	-1.38697	0.179183	-7.74056	9.89783e-15	8.39643e-14
PAQR8	334.013	-1.3869	0.144328	-9.60935	7.30087e-22	9.99525e-21
PURG	67.1675	-1.38548	0.251408	-5.51089	3.57032e-08	1.71749e-07
2022-09-09	16103.2	-1.38541	0.123784	-11.1922	4.45184e-29	8.58841e-28
ZC4H2	578.28	-1.38493	0.135761	-10.2013	1.95734e-24	3.05575e-23
KLHL3	223.381	-1.38488	0.155445	-8.90915	5.14239e-19	5.93387e-18
TARBP1	1619.46	-1.38455	0.0897598	-15.425	1.1114e-53	4.70333e-52
EPHA3	2043.36	-1.38439	0.115596	-11.9761	4.74145e-33	1.08348e-31
SCART1	179.546	-1.38332	0.341877	-4.04624	5.20458e-05	0.00016772
CDK18	862.412	-1.38096	0.158462	-8.71481	2.91256e-18	3.21698e-17
HSDL1	2306.03	-1.38053	0.14812	-9.32034	1.15969e-20	1.48176e-19
ARHGAP33	1462.14	-1.37915	0.231929	-5.94643	2.74055e-09	1.48006e-08
TRNR	38.3871	-1.37852	0.374226	-3.68365	0.000229918	0.000672029
ACBD4	262.257	-1.378	0.18608	-7.40545	1.3071e-13	1.01902e-12
RGS12	1108.58	-1.3779	0.160568	-8.58141	9.37185e-18	1.00584e-16
FLJ22184	1459.71	-1.37781	0.0918149	-15.0064	6.67077e-51	2.59267e-49
LOC100996506	50.3251	-1.37776	0.305664	-4.50742	6.5621e-06	2.41312e-05
UNC13B	1131.7	-1.37711	0.110597	-12.4516	1.37045e-35	3.4499e-34
BTBD2	2096.5	-1.37688	0.126221	-10.9085	1.0501e-27	1.91263e-26
CTC-338M12.4	46.9665	-1.37686	0.352198	-3.90935	9.25458e-05	0.000288427
ZNF33B	268.484	-1.37521	0.188553	-7.29346	3.02089e-13	2.28603e-12
LOC100129518	10.346	-1.37383	0.576849	-2.38161	0.0172373	0.0355698
PLEKHG5	311.936	-1.37335	0.177064	-7.75621	8.7506e-15	7.46413e-14
SNAPC3	1035.46	-1.37293	0.21884	-6.27369	3.52584e-10	2.05919e-09
RP3-400N23.6	11.1174	-1.37279	0.546599	-2.51151	0.0120217	0.0257067
LGALS9	620.966	-1.37189	0.105721	-12.9765	1.6627e-38	4.58985e-37
AGTRAP	268.778	-1.37074	0.176848	-7.75096	9.11978e-15	7.75056e-14
HEY2	135.32	-1.36891	0.218404	-6.26779	3.66213e-10	2.13519e-09
CENPT	1552.22	-1.36874	0.231732	-5.90657	3.49299e-09	1.86796e-08
ARL11	106.689	-1.3678	0.248766	-5.49833	3.83402e-08	1.83342e-07
ILF3-AS1	199.226	-1.36729	0.16582	-8.24564	1.64281e-16	1.59708e-15
HEMGN	25.4713	-1.36634	0.421135	-3.24441	0.00117693	0.00306964
GCNT1	282.041	-1.36402	0.253222	-5.38663	7.17899e-08	3.32431e-07
FYB	1582.7	-1.36208	0.147526	-9.23286	2.63501e-20	3.29207e-19
SV2A	1059.18	-1.36079	0.092465	-14.7169	5.02496e-49	1.85964e-47
GABRD	18.3794	-1.36066	0.454126	-2.99622	0.0027335	0.0066583
TFDP2	1959.49	-1.36057	0.119972	-11.3408	8.24067e-30	1.64973e-28
CALHM2	223.115	-1.35916	0.16961	-8.01344	1.11548e-15	1.01685e-14
NTHL1	398.999	-1.35892	0.1262	-10.7679	4.87752e-27	8.55661e-26
PRR7-AS1	36.5097	-1.35774	0.334779	-4.05563	4.99985e-05	0.000161571
TNK2	601.733	-1.35616	0.165277	-8.20537	2.29873e-16	2.21159e-15
FLOT2	1151.57	-1.35501	0.0942742	-14.3731	7.63864e-47	2.67756e-45
GUCY2D	190.188	-1.354	0.217124	-6.23608	4.48658e-10	2.59743e-09
APOBR	88.5273	-1.35345	0.256846	-5.2695	1.36798e-07	6.12838e-07
MYCBPAP	78.3099	-1.35329	0.261199	-5.18107	2.20618e-07	9.6484e-07
NINL	856.229	-1.35281	0.212474	-6.36695	1.92821e-10	1.1537e-09
NAALADL1	14.1972	-1.35264	0.587922	-2.30071	0.021408	0.0431974
RP11-307C12.11	26.4297	-1.35245	0.371672	-3.63883	0.000273881	0.000790824
ZBTB7B	457.891	-1.35215	0.136695	-9.89171	4.52235e-23	6.56376e-22
MAST1	452.355	-1.35214	0.171216	-7.89725	2.85114e-15	2.52472e-14
AC003102.3	109.114	-1.35185	0.241453	-5.59879	2.15849e-08	1.06565e-07
GNAL	27.8363	-1.35135	0.37578	-3.59612	0.000322994	0.000921323
SPATS2	650.982	-1.35055	0.140417	-9.61816	6.70172e-22	9.20892e-21
HOXA7	98.4781	-1.34945	0.237609	-5.67929	1.35256e-08	6.80421e-08
TACC3	3235.68	-1.34923	0.19977	-6.7539	1.43919e-11	9.532e-11
F2RL2	91.3557	-1.34818	0.287585	-4.68795	2.75956e-06	1.06099e-05
YPEL4	49.888	-1.34743	0.416147	-3.23787	0.00120425	0.0031343
USP49	1048.66	-1.34685	0.170217	-7.91252	2.52224e-15	2.24524e-14
FAM161A	349.132	-1.34635	0.145942	-9.2253	2.82763e-20	3.52325e-19
FBXW8	310.451	-1.34629	0.14614	-9.21234	3.19102e-20	3.9601e-19
COL9A2	194.582	-1.34606	0.157957	-8.52168	1.57254e-17	1.64775e-16
RAD54B	677.318	-1.34568	0.148478	-9.06314	1.26745e-19	1.51718e-18
NIPSNAP1	1901.34	-1.34547	0.0893614	-15.0566	3.12624e-51	1.22789e-49
FOXN3	2356.86	-1.34446	0.166292	-8.08496	6.21865e-16	5.76497e-15
NYNRIN	91.8234	-1.34434	0.214905	-6.25552	3.96188e-10	2.30372e-09
FAM129B	620.171	-1.34416	0.124947	-10.7578	5.44421e-27	9.54176e-26
ZNF219	565.763	-1.34328	0.135798	-9.8918	4.51821e-23	6.56289e-22
QPRT	462.676	-1.34293	0.245915	-5.46097	4.73534e-08	2.24335e-07
CYP2U1	156.051	-1.34171	0.195253	-6.87164	6.34679e-12	4.32699e-11
RASD2	184.386	-1.34073	0.181183	-7.39985	1.36334e-13	1.06198e-12
ZFP3	20.9712	-1.34006	0.395833	-3.38542	0.000710684	0.00192213
PTPRU	827.819	-1.33957	0.181115	-7.39623	1.40109e-13	1.09001e-12
AURKC	14.1134	-1.33918	0.520737	-2.5717	0.0101201	0.0219922
TBC1D2B	1440.63	-1.33683	0.108569	-12.3132	7.69199e-35	1.88029e-33
IFFO1	557.653	-1.33671	0.123108	-10.858	1.82663e-27	3.2756e-26
LOC100506538	29.0784	-1.33668	0.368247	-3.62985	0.000283585	0.00081618
IMPA2	750.116	-1.33645	0.102084	-13.0916	3.67757e-39	1.03518e-37
FLJ20464	70.3571	-1.3362	0.349896	-3.81885	0.000134075	0.0004072
SLC5A2	23.6209	-1.33613	0.43172	-3.09491	0.00196875	0.00492664
RCBTB2	840.827	-1.33548	0.115505	-11.562	6.41608e-31	1.35145e-29
ARVCF	271.46	-1.33468	0.147514	-9.0478	1.45878e-19	1.74396e-18
LRRC3DN	40.3294	-1.33228	0.35557	-3.74689	0.000179038	0.000533211
LINC00938	234.534	-1.33191	0.249563	-5.33697	9.45144e-08	4.30154e-07
EPHA1	26.6435	-1.33185	0.428045	-3.11147	0.00186156	0.00468493
MBP	1813.29	-1.33167	0.129819	-10.2579	1.09024e-24	1.72231e-23
PAAF1	496.196	-1.3314	0.122054	-10.9083	1.05208e-27	1.91435e-26
PMS1	533.869	-1.33007	0.114827	-11.5833	5.00939e-31	1.06117e-29
ZBTB8A	205.433	-1.32973	0.160781	-8.27044	1.33466e-16	1.30502e-15
B3GNT4	100.802	-1.32872	0.301453	-4.40771	1.0447e-05	3.73959e-05
ID1	923.531	-1.32774	0.182014	-7.29474	2.99226e-13	2.26529e-12
AGO4	838.301	-1.32719	0.112745	-11.7716	5.46671e-32	1.19343e-30
TMEM91	48.1236	-1.32659	0.345068	-3.84444	0.000120827	0.000369866
ZMYM1	285.025	-1.32568	0.163667	-8.09984	5.50294e-16	5.12963e-15
HES6	229.84	-1.32562	0.230475	-5.75167	8.83659e-09	4.55006e-08
2022-03-09	835.371	-1.32554	0.0988288	-13.4125	5.10754e-41	1.5182e-39
PCMTD1	646.221	-1.32509	0.157451	-8.41589	3.89917e-17	3.96273e-16
IFIT2	46.8989	-1.32478	0.325171	-4.07412	4.61883e-05	0.000150173
ZSCAN2	298.808	-1.32455	0.140884	-9.4017	5.36902e-21	6.97035e-20
KATNAL1	432.67	-1.32362	0.147856	-8.95206	3.48898e-19	4.0613e-18
KCTD7	523.454	-1.3231	0.185441	-7.13486	9.68836e-13	7.06122e-12
LIG4	2463.85	-1.32287	0.1857	-7.1237	1.05069e-12	7.62193e-12
LOC101928830	40.8304	-1.3228	0.309885	-4.26868	1.96631e-05	6.75857e-05
CYTH4	25.6942	-1.32273	0.406483	-3.25407	0.00113763	0.00297591
LRP2	127.905	-1.32185	0.215408	-6.13651	8.43537e-10	4.76185e-09
PRRG2	16.1906	-1.3214	0.501902	-2.63278	0.00846882	0.0186724
IRF2	605.649	-1.32086	0.174404	-7.57356	3.63133e-14	2.95113e-13
PTK7	2229.47	-1.32036	0.0982469	-13.4392	3.5603e-41	1.0634e-39
PAIP2B	280.233	-1.32011	0.220568	-5.98504	2.16331e-09	1.18101e-08
S100PBP	756.691	-1.31942	0.168007	-7.85333	4.05128e-15	3.54354e-14
WTIP	12.0643	-1.31896	0.522916	-2.52232	0.0116582	0.0249956
SPOCK2	248.184	-1.31881	0.2314	-5.69928	1.20316e-08	6.08725e-08
RNASE4	147.872	-1.3178	0.293579	-4.48873	7.165e-06	2.62133e-05
LOC100996756	9.35316	-1.31759	0.571703	-2.30467	0.021185	0.0427753
HEBP1	461.526	-1.31748	0.141542	-9.30805	1.30201e-20	1.65563e-19
NDRG2	387.827	-1.31746	0.142561	-9.24138	2.43347e-20	3.04437e-19
CACNA1C-AS1	20.1713	-1.31743	0.40855	-3.22465	0.00126129	0.00327174
LOC100505761	160.163	-1.31624	0.175249	-7.51068	5.88202e-14	4.70612e-13
FAM110C	804.546	-1.31481	0.172755	-7.61081	2.72382e-14	2.22921e-13
PSD	125.796	-1.31425	0.231658	-5.67322	1.40141e-08	7.04231e-08
ASH1L-AS1	36.6022	-1.31357	0.351165	-3.74059	0.000183585	0.000546053
RAD9A	843.601	-1.31355	0.138474	-9.48592	2.40264e-21	3.19744e-20
ABCC5	127.003	-1.31276	0.201044	-6.52972	6.58925e-11	4.12311e-10
CSTF3-AS1	22.5996	-1.3122	0.406609	-3.22718	0.00125015	0.00324679
KCTD19	139.029	-1.30987	0.283965	-4.61279	3.97293e-06	1.49684e-05
UGT3A2	112.765	-1.3092	0.312275	-4.19245	2.7596e-05	9.30113e-05
FAM45B	47.4295	-1.30869	0.277976	-4.70794	2.50228e-06	9.6748e-06
ASPDH	22.4538	-1.30866	0.42256	-3.09697	0.00195507	0.00489703
SCN9A	65.9179	-1.30808	0.262399	-4.98507	6.19387e-07	2.57542e-06
NKAIN2	54.2124	-1.30768	0.34337	-3.80835	0.000139896	0.000423219
FAM8A1	585.291	-1.30664	0.171954	-7.59878	2.98932e-14	2.44542e-13
MGAT1	2104.35	-1.30497	0.171938	-7.58975	3.20525e-14	2.61861e-13
IGFBP5	10.6519	-1.30447	0.544127	-2.39736	0.0165138	0.0342021
PCBP4	788.417	-1.30359	0.11973	-10.8877	1.3186e-27	2.37834e-26
KCNAB2	11079.2	-1.30271	0.130165	-10.0081	1.40401e-23	2.09171e-22
UBL4A	919.268	-1.30252	0.118328	-11.0077	3.50946e-28	6.49391e-27
FHOD3	13.113	-1.30249	0.538587	-2.41835	0.0155913	0.0324579
TSPAN14	1047.12	-1.30089	0.108345	-12.0069	3.26943e-33	7.51726e-32
MPPED2	468.654	-1.30047	0.131798	-9.86716	5.7775e-23	8.37242e-22
METTL15	236.749	-1.29981	0.174799	-7.43603	1.0376e-13	8.16802e-13
LOC102724925	15.5596	-1.29918	0.47374	-2.74239	0.0060993	0.0138456
GP1BA	76.5057	-1.29815	0.291749	-4.44953	8.6057e-06	3.11408e-05
LOC285074	253.426	-1.29797	0.271028	-4.78904	1.6758e-06	6.60857e-06
ZYG11B	486.583	-1.29737	0.145337	-8.92666	4.39068e-19	5.07908e-18
FAM184B	62.7804	-1.29674	0.283062	-4.58112	4.62488e-06	1.73123e-05
PPP1R21	300.987	-1.29637	0.161594	-8.02241	1.03689e-15	9.49399e-15
CAPN10-AS1	80.4583	-1.29539	0.316781	-4.08923	4.32807e-05	0.000141389
TMTC4	384.055	-1.29521	0.136578	-9.48328	2.46402e-21	3.27443e-20
KIF9-AS1	27.652	-1.29412	0.375616	-3.44534	0.000570351	0.00156583
SIRT3	310.531	-1.29406	0.149749	-8.64155	5.54548e-18	6.03185e-17
ACVR2B	776.062	-1.29394	0.238602	-5.423	5.86064e-08	2.74116e-07
PTGES3L-AARSD1	13.0095	-1.29393	0.499629	-2.58978	0.00960367	0.020941
FAM214B	354.657	-1.2936	0.158516	-8.16066	3.33187e-16	3.15492e-15
PRKG2	209.711	-1.29259	0.192216	-6.72469	1.75971e-11	1.156e-10
CALCOCO2	2009.96	-1.29244	0.0949409	-13.6131	3.34711e-42	1.03984e-40
ASB12	21.8677	-1.29156	0.419468	-3.07903	0.00207673	0.00517663
HERPUD2	496.793	-1.29077	0.215678	-5.9847	2.16784e-09	1.1828e-08
CREBRF	237.759	-1.29067	0.367064	-3.51621	0.00043776	0.00122721
DMTN	117.995	-1.2903	0.246205	-5.24077	1.59912e-07	7.10728e-07
RASSF4	638.687	-1.29028	0.115759	-11.1462	7.47067e-29	1.42349e-27
PHLDA3	271.223	-1.29023	0.15449	-8.35153	6.7382e-17	6.71939e-16
TMEM107	287.409	-1.2894	0.257904	-4.99954	5.74685e-07	2.39652e-06
FLJ45825	10.5629	-1.28905	0.549654	-2.3452	0.0190168	0.0388064
RP11-439L8.3	36.532	-1.28901	0.499706	-2.57954	0.00989315	0.0215292
RAD52	280.945	-1.28892	0.173158	-7.44362	9.79622e-14	7.72143e-13
F12	667.467	-1.28829	0.115226	-11.1806	5.07638e-29	9.7326e-28
PTP4A2	6898.94	-1.28828	0.109665	-11.7475	7.27697e-32	1.58304e-30
DGKA	1880.56	-1.28776	0.0865254	-14.883	4.24959e-50	1.62446e-48
CLTCL1	178.353	-1.28749	0.167759	-7.67467	1.65847e-14	1.38039e-13
FZD3	322.504	-1.28732	0.133759	-9.62414	6.32313e-22	8.69512e-21
OARD1	484.911	-1.28696	0.153276	-8.39636	4.60529e-17	4.65743e-16
LZTS2	819.927	-1.28625	0.1451	-8.86453	7.68261e-19	8.77783e-18
C11orf35-2	28.0942	-1.28554	0.440232	-2.92015	0.00349868	0.00835777
ARRB1	471.453	-1.28537	0.25183	-5.10414	3.32304e-07	1.42084e-06
LOC101926967	63.8281	-1.28501	0.314472	-4.08624	4.38416e-05	0.000143043
LOC728975	16.088	-1.28479	0.452221	-2.84106	0.0044964	0.0105193
LOC101927181	85.452	-1.28472	0.314823	-4.08077	4.48871e-05	0.000146249
SLC30A8	14.1702	-1.28466	0.511598	-2.51107	0.0120367	0.0257357
LINC00920	18.7294	-1.28161	0.448521	-2.85742	0.00427104	0.0100338
HOXB3	386.641	-1.28129	0.160309	-7.99261	1.32108e-15	1.19839e-14
TRAM2-AS1	50.9501	-1.28018	0.310092	-4.1284	3.65291e-05	0.000120862
MAP3K6	81.0153	-1.27888	0.257883	-4.95914	7.08048e-07	2.92509e-06
PXDN	2929.14	-1.27614	0.110262	-11.5736	5.60547e-31	1.18339e-29
ARHGEF6	3281.67	-1.27603	0.169233	-7.54005	4.69808e-14	3.78659e-13
CYB5RL	199.397	-1.27497	0.180451	-7.06546	1.60081e-12	1.14428e-11
DPY19L1P1	48.343	-1.27343	0.358394	-3.55317	0.000380622	0.0010753
GPR124	620.774	-1.27285	0.1235	-10.3064	6.58944e-25	1.0508e-23
NFATC4	570.899	-1.27215	0.288112	-4.41549	1.00784e-05	3.61389e-05
MRPL34	870.589	-1.27208	0.117324	-10.8424	2.16666e-27	3.86668e-26
XAF1	628.849	-1.27163	0.199369	-6.37829	1.79081e-10	1.07529e-09
DBN1	4263.02	-1.27148	0.0937186	-13.567	6.28054e-42	1.91279e-40
NRN1L	11.7622	-1.27117	0.521525	-2.43742	0.0147927	0.0309654
CDADC1	272.262	-1.27081	0.151067	-8.41223	4.023e-17	4.08411e-16
FAM57B	261.352	-1.27074	0.253639	-5.01004	5.442e-07	2.27501e-06
HSH2D	168.152	-1.27073	0.168396	-7.54606	4.48636e-14	3.62066e-13
LOC101928963	24.146	-1.27035	0.446937	-2.84235	0.00447825	0.0104835
C1RL	44.1203	-1.26945	0.319757	-3.97006	7.18556e-05	0.000226991
COASY	1543.97	-1.26795	0.0882295	-14.3711	7.85702e-47	2.74892e-45
TMEM191B	13.6359	-1.26714	0.54741	-2.3148	0.0206241	0.0417335
DNAH11	39.7761	-1.26555	0.313643	-4.03501	5.45991e-05	0.000175461
SGOL2	1647.19	-1.26493	0.192489	-6.57143	4.98351e-11	3.15339e-10
SCARB2	1022.4	-1.26392	0.102367	-12.347	5.05812e-35	1.24463e-33
PIK3IP1	72.3861	-1.26345	0.362964	-3.48092	0.000499687	0.00138596
TBC1D8	560.062	-1.26343	0.118544	-10.658	1.60052e-26	2.75829e-25
PRIM1	767.685	-1.26303	0.112233	-11.2537	2.22087e-29	4.36146e-28
OAS1	133.177	-1.26302	0.240098	-5.26042	1.43725e-07	6.42372e-07
CYTH1	2682.96	-1.26275	0.095364	-13.2413	5.06376e-40	1.46991e-38
TBC1D19	359.471	-1.26194	0.137471	-9.17968	4.32388e-20	5.32685e-19
LOC102723907	17.9591	-1.26182	0.482773	-2.61368	0.00895721	0.0196443
TMEM52	94.8822	-1.26119	0.283709	-4.44539	8.77345e-06	3.17229e-05
ATP6V0E2-AS1	47.0991	-1.25992	0.439177	-2.86883	0.00411995	0.00970956
NDRG1	2025.12	-1.25986	0.405952	-3.10347	0.00191267	0.004796
PLOD1	499.068	-1.25872	0.144376	-8.71837	2.82237e-18	3.1248e-17
C12orf76	188.158	-1.2581	0.264926	-4.74887	2.04561e-06	7.98054e-06
RNF144B	172.938	-1.25749	0.163219	-7.70428	1.31581e-14	1.10462e-13
PDZD7	88.148	-1.25747	0.251463	-5.0006	5.71514e-07	2.38383e-06
MRI1	334.334	-1.25709	0.144973	-8.67116	4.27725e-18	4.67978e-17
VSIG10	211.835	-1.25681	0.173201	-7.25635	3.97684e-13	2.9803e-12
CABLES1	155.939	-1.2565	0.286784	-4.38135	1.17946e-05	4.18967e-05
BACE2	2147.58	-1.25533	0.116557	-10.7701	4.76668e-27	8.37799e-26
UCP2	1088.55	-1.25527	0.141904	-8.84592	9.07782e-19	1.03275e-17
RAB11FIP5	917.726	-1.25323	0.191287	-6.55156	5.69391e-11	3.58824e-10
ECT2	3052	-1.25231	0.152086	-8.23425	1.8068e-16	1.74917e-15
CTBP1-AS	77.7728	-1.25145	0.239063	-5.23482	1.65146e-07	7.3189e-07
RGMB-AS1	14.607	-1.25142	0.486061	-2.57461	0.0100354	0.0218234
MTHFR	712.857	-1.25128	0.138816	-9.01393	1.98809e-19	2.34954e-18
CCDC112	236.939	-1.25124	0.147397	-8.48894	2.08536e-17	2.16919e-16
NFYC-AS1	29.5435	-1.25063	0.419752	-2.97944	0.00288777	0.00700561
RP11-425I13.3	43.9832	-1.24943	0.320691	-3.89606	9.77692e-05	0.000303637
CNNM1	265.912	-1.2491	0.139244	-8.97056	2.9501e-19	3.45132e-18
SAMD1	1441.12	-1.24897	0.0968587	-12.8948	4.81544e-38	1.30031e-36
C10orf95	25.7268	-1.24885	0.367675	-3.39662	0.000682245	0.00185006
TRIM13	523.954	-1.24844	0.126819	-9.84423	7.25928e-23	1.04707e-21
LOC101928323	45.2742	-1.24785	0.314298	-3.97029	7.17845e-05	0.000226805
UHRF2	1942.19	-1.24756	0.158288	-7.88157	3.23289e-15	2.85188e-14
RIMS3	1238.44	-1.24712	0.11991	-10.4004	2.46785e-25	4.02879e-24
ATG4C	360.883	-1.24655	0.139274	-8.95036	3.54325e-19	4.12188e-18
PTGES	15.4141	-1.24635	0.502404	-2.48077	0.01311	0.027809
ITGB4	128.113	-1.24554	0.207518	-6.00205	1.94843e-09	1.06747e-08
TRMT1L	465.236	-1.24479	0.131577	-9.46061	3.06142e-21	4.04229e-20
ASB9	32.1123	-1.24435	0.378734	-3.28556	0.00101781	0.00268516
HERC2P3	49.26	-1.24431	0.282371	-4.40664	1.04987e-05	3.75664e-05
ZNF575	114.068	-1.24404	0.216359	-5.74988	8.93091e-09	4.59481e-08
PDK1	2588.88	-1.24398	0.239564	-5.19268	2.0729e-07	9.08691e-07
CCDC146	34.9342	-1.24391	0.318755	-3.9024	9.52447e-05	0.000296391
CD1E	364.817	-1.24362	0.14728	-8.44393	3.06832e-17	3.14587e-16
GFI1	327.051	-1.24362	0.295585	-4.20732	2.58418e-05	8.74159e-05
GUCY1B2	29.0321	-1.24251	0.385173	-3.22585	0.00125597	0.00326023
RAB38	12.6716	-1.24233	0.52579	-2.36278	0.0181385	0.0371898
TBX19	13.7367	-1.24228	0.473057	-2.62606	0.00863799	0.0190138
CEMP1	72.5158	-1.24181	0.28396	-4.37321	1.22435e-05	4.33836e-05
ERCC6L	785.709	-1.24181	0.102842	-12.0748	1.43446e-33	3.36907e-32
METTL21B	178.352	-1.24144	0.207968	-5.96937	2.38174e-09	1.29608e-08
LOC101927071	15.0041	-1.2402	0.552133	-2.24619	0.0246917	0.0490612
LDOC1L	1612.44	-1.23792	0.136306	-9.08188	1.0672e-19	1.28409e-18
SERGEF	447.101	-1.23738	0.21955	-5.63597	1.74074e-08	8.68405e-08
EPX	38.1271	-1.23606	0.382558	-3.23102	0.00123347	0.00320541
RP5-1043L13.1	59.6332	-1.2357	0.278298	-4.44022	8.98681e-06	3.24314e-05
SLC25A42	452.776	-1.23532	0.118417	-10.4319	1.77258e-25	2.91424e-24
RASA2	396.918	-1.23502	0.150833	-8.18803	2.65548e-16	2.53642e-15
DENND1C	950.101	-1.23388	0.107255	-11.5041	1.25744e-30	2.61891e-29
MBD5	173.099	-1.23295	0.162985	-7.56478	3.88534e-14	3.15205e-13
RNF125	101.44	-1.23204	0.237098	-5.19631	2.03281e-07	8.91748e-07
PDLIM1	2793.56	-1.23158	0.156139	-7.88769	3.07833e-15	2.72071e-14
UTRN	365.056	-1.23116	0.134714	-9.139	6.30325e-20	7.65371e-19
ACSS2	261.096	-1.23057	0.235749	-5.21985	1.79068e-07	7.90194e-07
MIR600HG	147.743	-1.22975	0.284761	-4.31854	1.57064e-05	5.47352e-05
FAM171A2	404.944	-1.22879	0.139811	-8.7889	1.51037e-18	1.69544e-17
PACS1	1332.92	-1.22857	0.145046	-8.47025	2.44857e-17	2.53282e-16
FAM86A	233.321	-1.22847	0.287336	-4.27537	1.90823e-05	6.56623e-05
SFI1	1504.28	-1.22813	0.131731	-9.32305	1.13042e-20	1.44535e-19
ENKD1	247.53	-1.22807	0.153298	-8.01098	1.138e-15	1.03636e-14
NOTUM	58.3689	-1.22743	0.324514	-3.78237	0.000155342	0.000466528
TMEFF1	59.7879	-1.22741	0.254715	-4.81875	1.4446e-06	5.74685e-06
ATG16L2	577.998	-1.22728	0.200553	-6.11947	9.38887e-10	5.27606e-09
CCNO	170.079	-1.226	0.224621	-5.45807	4.81342e-08	2.27773e-07
ATP13A4	28.634	-1.22585	0.379596	-3.22935	0.00124072	0.00322333
GAB3	225.734	-1.22498	0.15435	-7.93639	2.08145e-15	1.86088e-14
SH3BP1	569.819	-1.22442	0.106617	-11.4842	1.58321e-30	3.29004e-29
AFF3	252.722	-1.22434	0.144189	-8.49122	2.04477e-17	2.12817e-16
COL9A3	18.6906	-1.22415	0.454443	-2.69374	0.00706552	0.0158053
SEMA3G	60.4266	-1.22231	0.404893	-3.01884	0.00253747	0.0062249
GNAQ	2869.24	-1.22219	0.0775454	-15.7609	5.77788e-56	2.63738e-54
TMEM25	194.277	-1.22206	0.153789	-7.94634	1.92101e-15	1.72158e-14
FLJ42351	13.8218	-1.22144	0.525915	-2.32251	0.0202053	0.0409574
DLEU1	185.559	-1.22103	0.197065	-6.19608	5.78862e-10	3.32327e-09
LOC400622	17.9909	-1.22088	0.431752	-2.82774	0.00468774	0.0109093
CAMKK1	266.84	-1.2202	0.158992	-7.67461	1.65917e-14	1.38039e-13
LINC00634	24.1776	-1.21988	0.38914	-3.13481	0.00171966	0.00436207
STX18-AS1	21.0938	-1.21846	0.399433	-3.05047	0.00228486	0.00564723
RMI1	922.597	-1.21817	0.113584	-10.7249	7.78114e-27	1.35863e-25
LOC101929054	28.3061	-1.21743	0.4056	-3.00156	0.00268604	0.00655216
RTKN	136.2	-1.21707	0.247301	-4.92144	8.59117e-07	3.51557e-06
TBCK	223.924	-1.217	0.154611	-7.87137	3.50778e-15	3.07975e-14
TMPO-AS1	185.239	-1.21679	0.171584	-7.09147	1.32693e-12	9.55863e-12
KIAA0195	1325.14	-1.2162	0.155519	-7.82031	5.26932e-15	4.57446e-14
AIF1L	158.629	-1.21563	0.166002	-7.32295	2.42579e-13	1.85458e-12
MAP3K3	954.874	-1.21543	0.159662	-7.61256	2.68728e-14	2.20027e-13
JMJD7	109.454	-1.21471	0.23543	-5.15954	2.47558e-07	1.07708e-06
TJP3	102.92	-1.21469	0.303886	-3.99717	6.41031e-05	0.000203888
YEATS2	2502.98	-1.21462	0.194594	-6.24183	4.32478e-10	2.50924e-09
LOC102724248	112.685	-1.21383	0.247871	-4.89704	9.72922e-07	3.94908e-06
PLA2G6	822.316	-1.21239	0.183525	-6.60613	3.945e-11	2.52203e-10
RAP1GDS1	3138.14	-1.21171	0.0978494	-12.3834	3.21434e-35	7.96213e-34
C1orf51	32.0075	-1.21122	0.402273	-3.01093	0.00260446	0.00637333
ZNF449	158.977	-1.2103	0.243342	-4.97365	6.57054e-07	2.72108e-06
LOC158960	36.1854	-1.21015	0.327413	-3.69611	0.000218924	0.000642021
SLC30A3	248.264	-1.20934	0.191376	-6.31917	2.62968e-10	1.5534e-09
HOTAIR	19.0494	-1.20832	0.414567	-2.91465	0.00356091	0.00849333
TXLNG2P	1003.93	-1.20811	0.130334	-9.26936	1.87275e-20	2.35398e-19
EFCAB4A	330.076	-1.20754	0.25086	-4.8136	1.48237e-06	5.88954e-06
MAZ	9566.38	-1.20706	0.095411	-12.6511	1.10297e-36	2.85788e-35
CCR7	505.459	-1.20543	0.138065	-8.73094	2.52565e-18	2.80128e-17
ZMYND10	99.0665	-1.20497	0.261262	-4.61211	3.98597e-06	1.50114e-05
BIVM	280.467	-1.20404	0.140379	-8.57711	9.72839e-18	1.0435e-16
KHK	265.941	-1.20352	0.185069	-6.50308	7.8694e-11	4.88139e-10
CCDC51	337.681	-1.20339	0.148457	-8.10595	5.23368e-16	4.88845e-15
TMEM44	363.531	-1.20315	0.141146	-8.5242	1.53863e-17	1.61496e-16
LOC102723980	25.1417	-1.2031	0.386173	-3.11544	0.0018367	0.00462738
BCORL1	775.967	-1.20289	0.104777	-11.4805	1.65289e-30	3.42334e-29
TFAP4	221.087	-1.2027	0.17068	-7.04656	1.83399e-12	1.30644e-11
RNF208	482.868	-1.20248	0.136798	-8.79023	1.49259e-18	1.67751e-17
ZNF254	155.976	-1.202	0.237159	-5.06835	4.01285e-07	1.70363e-06
TNFSF13B	94.6333	-1.20176	0.271906	-4.41975	9.88169e-06	3.54816e-05
GOLGA2P5	331.248	-1.20169	0.212866	-5.64529	1.64907e-08	8.24226e-08
MYOM2	23.862	-1.20166	0.381817	-3.14721	0.00164838	0.00419559
DDX25	318.461	-1.20092	0.171012	-7.02243	2.18048e-12	1.5432e-11
FHDC1	16.0595	-1.19877	0.451299	-2.65627	0.00790097	0.0175075
PARP15	176.94	-1.19862	0.17497	-6.85044	7.36214e-12	4.99539e-11
GZMA	62.2025	-1.1986	0.381704	-3.14014	0.00168866	0.00428931
ZNF692	922.294	-1.1983	0.16415	-7.30002	2.8772e-13	2.18263e-12
TFEB	373.337	-1.19756	0.180124	-6.64853	2.96044e-11	1.90704e-10
LOC102723726	35.581	-1.19752	0.366344	-3.26883	0.00107992	0.00283572
ST5	158.523	-1.19705	0.193061	-6.20036	5.63337e-10	3.24216e-09
HAR1A	158.952	-1.19675	0.220884	-5.418	6.02709e-08	2.81405e-07
DNASE1L1	93.8585	-1.1958	0.223251	-5.35628	8.4955e-08	3.89318e-07
EEFSEC	398.642	-1.19547	0.164322	-7.27515	3.46037e-13	2.60904e-12
PITPNM2	1439.4	-1.19465	0.181486	-6.5826	4.62307e-11	2.93532e-10
CNPY4	108.734	-1.19364	0.222721	-5.35936	8.35171e-08	3.83296e-07
TKTL1	65.6047	-1.1934	0.305163	-3.9107	9.20277e-05	0.000286909
CAPN5	492.857	-1.19317	0.118628	-10.058	8.46805e-24	1.27798e-22
IZUMO4	390.57	-1.19261	0.318416	-3.74544	0.000180076	0.000535959
ARL2	413.41	-1.19252	0.130133	-9.16381	5.0098e-20	6.13528e-19
TSKU	165.074	-1.19198	0.191091	-6.23775	4.43902e-10	2.5723e-09
SENP7	801.533	-1.18976	0.153054	-7.77346	7.63709e-15	6.55041e-14
CAMK2G	1167.7	-1.18953	0.106785	-11.1395	8.05874e-29	1.53083e-27
DICER1	2511.89	-1.18858	0.208446	-5.70213	1.18318e-08	5.9894e-08
HSD11B1L	130.455	-1.18831	0.255465	-4.65155	3.29449e-06	1.25369e-05
SHANK1	1011.15	-1.18699	0.117462	-10.1054	5.22916e-24	7.9891e-23
CYP2B7P	28.433	-1.18656	0.478988	-2.47722	0.0132409	0.0280299
ZSCAN30	236.573	-1.18631	0.168055	-7.05907	1.67619e-12	1.19678e-11
LEF1-AS1	121.389	-1.18509	0.21221	-5.5845	2.34375e-08	1.15069e-07
FBXL16	291.679	-1.18483	0.173508	-6.82871	8.56826e-12	5.7758e-11
STK16	471.934	-1.18441	0.125697	-9.42273	4.3953e-21	5.75041e-20
COLQ	14.743	-1.18409	0.472889	-2.50395	0.0122815	0.0262079
LINC00672	23.8933	-1.18384	0.395521	-2.99313	0.00276135	0.00671911
ANKRD9	164.102	-1.18369	0.303999	-3.89372	9.872e-05	0.000306487
EPOR	232.161	-1.18363	0.17305	-6.83981	7.92966e-12	5.3687e-11
MAPK12	334.008	-1.18309	0.125622	-9.41783	4.60503e-21	6.01211e-20
LRIG3	412.91	-1.18274	0.154393	-7.66062	1.85041e-14	1.53537e-13
BNIPL	35.6771	-1.18232	0.392428	-3.01283	0.00258825	0.00634026
MRC2	1236.94	-1.18222	0.218102	-5.4205	5.94329e-08	2.77702e-07
CTAGE7P	12.2156	-1.18214	0.516491	-2.28879	0.0220916	0.0444753
C12orf65	516.956	-1.18112	0.179798	-6.56919	5.05909e-11	3.19904e-10
SAMD10	282.76	-1.18056	0.158923	-7.4285	1.09834e-13	8.6279e-13
LOC642441	20.0529	-1.17886	0.443963	-2.65531	0.00792362	0.0175537
C2orf48	95.2011	-1.17823	0.304374	-3.871	0.00010839	0.000334497
KIF20A	1482.08	-1.1779	0.238833	-4.93191	8.14289e-07	3.34465e-06
MBOAT1	376.874	-1.1778	0.133635	-8.81355	1.21248e-18	1.371e-17
VAV1	2231.07	-1.17708	0.0911966	-12.907	4.10931e-38	1.11449e-36
GPR133	162.102	-1.176	0.224242	-5.24435	1.56835e-07	6.97722e-07
NKTR	2366.28	-1.17544	0.128817	-9.12484	7.18391e-20	8.71736e-19
ANXA11	1314.88	-1.17534	0.113952	-10.3144	6.06772e-25	9.6927e-24
ZNF248	414.905	-1.17523	0.121627	-9.66259	4.34716e-22	6.02249e-21
HBQ1	64.0635	-1.17503	0.246585	-4.76522	1.88648e-06	7.39231e-06
PANK1	187.765	-1.1736	0.216783	-5.41368	6.17435e-08	2.87631e-07
SLC16A14	148.81	-1.17301	0.186124	-6.30227	2.93314e-10	1.72552e-09
SERPINF1	93.6461	-1.17292	0.259276	-4.52383	6.073e-06	2.24213e-05
TSTD3	20.9966	-1.17229	0.411228	-2.8507	0.0043623	0.0102275
FCHO1	924.596	-1.17165	0.155434	-7.53794	4.77441e-14	3.84644e-13
C4orf21	1146.81	-1.1715	0.162575	-7.20594	5.76465e-13	4.27357e-12
C2orf68	617.997	-1.17128	0.106183	-11.0307	2.71671e-28	5.06738e-27
PCCA	197.486	-1.17037	0.225646	-5.18675	2.13991e-07	9.37404e-07
FOXD2	151.29	-1.17023	0.282923	-4.13624	3.53048e-05	0.000117019
SHMT1	1450.38	-1.17023	0.117162	-9.98818	1.71712e-23	2.54189e-22
SAC3D1	897.189	-1.17009	0.115314	-10.1469	3.41931e-24	5.2586e-23
FUT8	748.181	-1.16921	0.116367	-10.0476	9.41262e-24	1.41823e-22
KIAA0226L	384.758	-1.16916	0.144289	-8.10293	5.36515e-16	5.00622e-15
LOC100996693	12.0422	-1.16887	0.494865	-2.362	0.0181766	0.0372514
ZBED4	3843.45	-1.1688	0.0903494	-12.9364	2.80314e-38	7.65834e-37
DEGS2	71.1274	-1.16839	0.280551	-4.16461	3.11887e-05	0.000104288
MAP4	3334.34	-1.16833	0.110349	-10.5877	3.39967e-26	5.77322e-25
LOC100507131	17.2159	-1.16823	0.473705	-2.46616	0.0136569	0.0288186
AP2A2	152.724	-1.16745	0.206865	-5.64352	1.66605e-08	8.32261e-08
TLN2	238.56	-1.16738	0.161543	-7.22645	4.95773e-13	3.69009e-12
ZNF491	34.8302	-1.16707	0.365087	-3.1967	0.00139008	0.00357933
TMEM121	88.7566	-1.16706	0.220176	-5.30057	1.15444e-07	5.21702e-07
KLHL17	1867.91	-1.16655	0.137618	-8.47668	2.3171e-17	2.40353e-16
PITPNM1	580.456	-1.16516	0.146075	-7.97645	1.50597e-15	1.36079e-14
ACP6	40.4489	-1.16438	0.317593	-3.66625	0.000246131	0.000715926
PIK3R3	1463.63	-1.16391	0.102077	-11.4022	4.07533e-30	8.27448e-29
GNA11	573.397	-1.16364	0.182475	-6.37698	1.80613e-10	1.08345e-09
TRNL2	23.6547	-1.16276	0.39728	-2.92681	0.00342462	0.00819141
HERC2P2	210.586	-1.16251	0.168174	-6.91256	4.75974e-12	3.28235e-11
ARSA	533.198	-1.1602	0.202915	-5.71766	1.08002e-08	5.51074e-08
MAP7	33.2038	-1.15989	0.348119	-3.33187	0.000862635	0.00230288
VAT1	7898.83	-1.15891	0.107258	-10.8048	3.2657e-27	5.79466e-26
C17orf59	265.814	-1.15745	0.198419	-5.83337	5.43194e-09	2.85715e-08
FBXO44	813.907	-1.1573	0.155158	-7.45885	8.72816e-14	6.90595e-13
C5	161.299	-1.15703	0.177144	-6.53154	6.50947e-11	4.07593e-10
XYLB	371.461	-1.15667	0.162523	-7.11697	1.10325e-12	7.99386e-12
TRNE	734.998	-1.15581	0.117877	-9.80522	1.06918e-22	1.52325e-21
LOC102724667	26.4543	-1.15451	0.383455	-3.0108	0.00260557	0.00637513
MAPK14	2507.24	-1.15399	0.120816	-9.55166	1.27639e-21	1.71832e-20
LINC00086	30.0237	-1.15347	0.362191	-3.18469	0.00144909	0.00371993
EEPD1	170.183	-1.15292	0.225372	-5.11565	3.12663e-07	1.34112e-06
CERS1	33.7015	-1.15176	0.350269	-3.28822	0.00100822	0.002661
WDFY2	400.188	-1.15159	0.148507	-7.75446	8.87189e-15	7.55717e-14
CA5B	62.211	-1.15158	0.25281	-4.55511	5.23587e-06	1.94934e-05
DZIP1L	19.7074	-1.1514	0.41856	-2.75086	0.00594398	0.0135145
MAPT-2	77.3243	-1.15123	0.291145	-3.95415	7.68058e-05	0.000241765
ZBTB4	705.313	-1.15077	0.143581	-8.01472	1.10385e-15	1.00773e-14
STAM	695.596	-1.15034	0.161247	-7.13402	9.74826e-13	7.10208e-12
METRN	491.419	-1.14951	0.113693	-10.1107	4.95467e-24	7.5822e-23
SEMA4G	191.237	-1.14936	0.158311	-7.26016	3.86636e-13	2.90102e-12
FAM101B	2752.2	-1.14856	0.099739	-11.5157	1.09987e-30	2.30366e-29
BCAT2	910.956	-1.14829	0.102304	-11.2243	3.09891e-29	6.02843e-28
APH1B	359.54	-1.14795	0.142284	-8.06802	7.14453e-16	6.60025e-15
VEGFB	1175.46	-1.14729	0.134578	-8.52504	1.52761e-17	1.60429e-16
CMC4	350.997	-1.14714	0.176767	-6.48959	8.60693e-11	5.31051e-10
PRAME-2	221.465	-1.14714	0.196827	-5.82814	5.60485e-09	2.94393e-08
FGF9	229.213	-1.14685	0.166487	-6.88851	5.6379e-12	3.86071e-11
ZNF362	695.958	-1.14663	0.135879	-8.4386	3.21158e-17	3.2837e-16
PELI2	1416.47	-1.14526	0.140967	-8.12436	4.49744e-16	4.21561e-15
ALDH1A2	1506.66	-1.14373	0.237918	-4.80724	1.5303e-06	6.07088e-06
TRADD	334.689	-1.14366	0.13004	-8.79468	1.43451e-18	1.61419e-17
TXNRD3	233.302	-1.14356	0.18168	-6.29438	3.0863e-10	1.81103e-09
ASB14	25.3896	-1.14326	0.362803	-3.15119	0.00162608	0.00414338
ATM	1187.17	-1.14207	0.0960027	-11.8962	1.23835e-32	2.78525e-31
PRICKLE4	145.591	-1.14199	0.20417	-5.59335	2.22734e-08	1.09702e-07
TNFAIP2	378.368	-1.14191	0.158852	-7.18855	6.54825e-13	4.83135e-12
ARHGAP12	226.116	-1.14163	0.171125	-6.67134	2.53481e-11	1.64312e-10
ZNF442	51.1773	-1.14086	0.372724	-3.06088	0.00220691	0.00547616
HS1BP3	210.788	-1.14075	0.159751	-7.1408	9.27899e-13	6.78414e-12
PCYOX1	835.475	-1.14008	0.10161	-11.2201	3.24721e-29	6.31033e-28
KIAA1161	206.97	-1.13973	0.184216	-6.1869	6.13605e-10	3.50755e-09
SNX20	104.441	-1.13911	0.198485	-5.73904	9.52173e-09	4.87985e-08
CPT1B	55.0842	-1.1391	0.35536	-3.20548	0.00134837	0.00348207
PIGL	174.878	-1.13788	0.23797	-4.78163	1.73881e-06	6.84688e-06
GARNL3	69.3443	-1.13711	0.262271	-4.33564	1.45339e-05	5.09071e-05
CSRP2BP	329.084	-1.13705	0.141497	-8.03589	9.2905e-16	8.5234e-15
TTC7A	632.818	-1.13585	0.129823	-8.74923	2.14821e-18	2.38978e-17
CD3G	1571.98	-1.13475	0.122213	-9.28505	1.61638e-20	2.04141e-19
ARHGAP4	2029.79	-1.13456	0.0996917	-11.3807	5.21844e-30	1.05378e-28
TMCC1-AS1	31.7356	-1.13452	0.363222	-3.12349	0.00178718	0.00450933
CHAT	20.5756	-1.13438	0.396748	-2.85919	0.00424719	0.00997904
ZDHHC8	864.104	-1.13403	0.120129	-9.44011	3.72373e-21	4.89939e-20
XYLT2	430.111	-1.1336	0.164402	-6.89533	5.37405e-12	3.69091e-11
EPHX2	1572.42	-1.13243	0.191227	-5.92195	3.18154e-09	1.70828e-08
ACSF2	662.184	-1.13237	0.201061	-5.632	1.78132e-08	8.87222e-08
ACOT11	50.1954	-1.1317	0.496384	-2.27988	0.0226147	0.0453995
MST1L	22.684	-1.13165	0.446876	-2.53235	0.0113301	0.0243736
BNIP3L	5824.89	-1.13155	0.212708	-5.31973	1.03922e-07	4.71007e-07
CORO1A	11659.4	-1.13131	0.0724038	-15.6251	4.91366e-55	2.16832e-53
SPOCD1	125.763	-1.13119	0.203633	-5.55506	2.77523e-08	1.35359e-07
TONSL	2102.09	-1.13099	0.110099	-10.2725	9.37385e-25	1.48463e-23
C9orf96	41.6907	-1.13062	0.292878	-3.86038	0.000113212	0.000348395
GPR113	50.3461	-1.1297	0.292071	-3.8679	0.000109774	0.000338544
ADAMTS6	28.1354	-1.12968	0.353715	-3.19377	0.0014043	0.00361244
ADA	13304.3	-1.1295	0.093492	-12.0812	1.3275e-33	3.12181e-32
NAA16	723.248	-1.12938	0.103076	-10.9568	6.16664e-28	1.13396e-26
MST1P2	138.525	-1.12904	0.270149	-4.17932	2.92388e-05	9.81921e-05
ANKRD22	29.8102	-1.12864	0.414091	-2.7256	0.00641854	0.0144836
FANCG	1453.32	-1.12806	0.110808	-10.1803	2.4281e-24	3.77483e-23
CEP57L1	440.345	-1.12781	0.159887	-7.05377	1.74137e-12	1.24141e-11
RNPEPL1	1420.13	-1.12742	0.0981919	-11.4818	1.62847e-30	3.37653e-29
RNF157	315.342	-1.12701	0.194044	-5.80803	6.32117e-09	3.29965e-08
DHTKD1	561.218	-1.12686	0.115449	-9.76069	1.66023e-22	2.34197e-21
TLX2	152.893	-1.12645	0.20467	-5.50373	3.71843e-08	1.78228e-07
FAM83F	99.0176	-1.12636	0.215493	-5.22689	1.72387e-07	7.6162e-07
KCNRG	14.6597	-1.12609	0.482219	-2.33523	0.0195316	0.0397478
PLXNB3	88.7847	-1.12586	0.359314	-3.13336	0.00172818	0.0043813
MSL1	1797.59	-1.12574	0.144706	-7.77952	7.28003e-15	6.25571e-14
MAP4K1	1588.4	-1.12569	0.0860141	-13.0872	3.89469e-39	1.09464e-37
RELL2	432.928	-1.12523	0.162809	-6.91134	4.80083e-12	3.30823e-11
SLC25A23	1134.17	-1.12475	0.103117	-10.9075	1.06127e-27	1.92919e-26
LOC101928548	33.5058	-1.12443	0.41644	-2.70009	0.00693201	0.0155441
LKAAEAR1	36.1061	-1.12411	0.356726	-3.15119	0.00162608	0.00414338
EFCAB2	73.2295	-1.12325	0.237558	-4.72833	2.2637e-06	8.79261e-06
PTPRVP	23.4196	-1.12319	0.424622	-2.64516	0.00816534	0.0180547
RECK	243.552	-1.12244	0.175472	-6.39667	1.58802e-10	9.58174e-10
RNF214	556.239	-1.12216	0.137795	-8.14366	3.83499e-16	3.61291e-15
MEGF6	188.099	-1.12193	0.164365	-6.82584	8.7414e-12	5.88824e-11
LOC101929638	130.796	-1.12187	0.201931	-5.55573	2.76457e-08	1.34874e-07
SLC6A6	736.825	-1.12175	0.136117	-8.2411	1.70632e-16	1.65709e-15
SNAI3	16.5437	-1.12115	0.45828	-2.44644	0.0144276	0.0302729
ANKRD23	112.924	-1.12008	0.18975	-5.90291	3.57139e-09	1.90878e-08
TTC30A	214.797	-1.11991	0.162525	-6.89069	5.55243e-12	3.8092e-11
KIF18B	2228.09	-1.11908	0.183528	-6.09762	1.07662e-09	6.02093e-09
CAMKMT	116.401	-1.11863	0.200201	-5.58753	2.30318e-08	1.13197e-07
FBLN2	4766.24	-1.11822	0.0870632	-12.8438	9.315e-38	2.48641e-36
CROCCP3	59.3542	-1.1181	0.254013	-4.40173	1.07392e-05	3.83385e-05
SAT2	399.863	-1.11797	0.187401	-5.96564	2.43684e-09	1.32528e-08
LRP5	929.958	-1.1171	0.116362	-9.60014	7.98396e-22	1.08983e-20
WDR76	2513.48	-1.11571	0.131918	-8.45754	2.73075e-17	2.81219e-16
ITGAL	4995.75	-1.1133	0.15813	-7.04042	1.91655e-12	1.36368e-11
MYH10	3565.07	-1.1125	0.136618	-8.14316	3.85087e-16	3.62602e-15
SLC38A3	80.5046	-1.11239	0.231226	-4.81084	1.50299e-06	5.96764e-06
LOC101929112	19.506	-1.11226	0.453412	-2.45308	0.0141637	0.029773
STARD4-AS1	135.645	-1.11136	0.228338	-4.86715	1.13221e-06	4.5558e-06
GMDS-AS1	61.4723	-1.1112	0.272743	-4.07419	4.6175e-05	0.000150156
GPR63	326.214	-1.1112	0.20908	-5.31473	1.06818e-07	4.8378e-07
ZNF138	333.823	-1.11101	0.124638	-8.91388	4.92785e-19	5.68984e-18
EFEMP1	866.278	-1.11068	0.111691	-9.94416	2.67408e-23	3.92409e-22
TBC1D9B	3729.45	-1.11043	0.0965537	-11.5006	1.30984e-30	2.725e-29
TRPM2	569.196	-1.10976	0.237895	-4.6649	3.08765e-06	1.17981e-05
EMID1	144.582	-1.10973	0.196934	-5.63504	1.75015e-08	8.72398e-08
ABI3	619.248	-1.10917	0.114499	-9.68713	3.42018e-22	4.75956e-21
FAM65B	982.306	-1.10844	0.118096	-9.38587	6.23986e-21	8.07833e-20
ZHX3	732.615	-1.10706	0.124702	-8.87763	6.83e-19	7.84226e-18
FAM219B	301.932	-1.10637	0.22228	-4.97736	6.4457e-07	2.67594e-06
RNF150	191.849	-1.10607	0.159433	-6.93754	3.98982e-12	2.76475e-11
PRIMPOL	337.437	-1.10598	0.131754	-8.39427	4.6879e-17	4.73583e-16
LOC646719	147.214	-1.10584	0.253782	-4.35745	1.31589e-05	4.63794e-05
C10orf91	34.3154	-1.10445	0.342719	-3.2226	0.00127032	0.0032938
GLTPD2	26.6992	-1.1033	0.356609	-3.09385	0.00197575	0.00494349
LEPREL2	553.711	-1.10249	0.238889	-4.61508	3.92949e-06	1.48137e-05
CCM2	1908.77	-1.10235	0.12196	-9.03867	1.58587e-19	1.89346e-18
PITX1	273.029	-1.10213	0.165435	-6.66204	2.70052e-11	1.74627e-10
ZMYND8	781.094	-1.10194	0.13755	-8.01119	1.13604e-15	1.03508e-14
HCK	72.2594	-1.10184	0.261445	-4.21442	2.50417e-05	8.50138e-05
PTK2B	1820.99	-1.10126	0.0808586	-13.6196	3.06416e-42	9.53534e-41
H2AFY2	34.875	-1.1011	0.321635	-3.42345	0.000618322	0.00168954
UBR2	1660.9	-1.10102	0.112373	-9.79791	1.1494e-22	1.63253e-21
LCAT	130.402	-1.10088	0.230598	-4.77403	1.80573e-06	7.09235e-06
MYOZ3	36.3656	-1.10071	0.356827	-3.08473	0.00203735	0.00508461
RP11-1072A3.2	48.9945	-1.10067	0.287728	-3.82537	0.000130575	0.000397676
RFC5	1980.75	-1.10062	0.125091	-8.79855	1.38592e-18	1.56236e-17
LOC102723564	115.501	-1.10041	0.252088	-4.36517	1.27023e-05	4.48639e-05
ADRBK2	5534.59	-1.09986	0.145455	-7.56146	3.98569e-14	3.23205e-13
SLC8B1	773.988	-1.09951	0.140759	-7.81131	5.65962e-15	4.90641e-14
PNMA3	233.272	-1.09914	0.175307	-6.26982	3.61458e-10	2.1097e-09
PDE8B	15.6084	-1.09687	0.46513	-2.3582	0.018364	0.0376066
TMEM198B	243.166	-1.09453	0.164223	-6.66488	2.64874e-11	1.71458e-10
CEP44	604.421	-1.09398	0.213754	-5.11793	3.089e-07	1.32596e-06
JPH3	27.0076	-1.09375	0.45986	-2.37843	0.0173865	0.0358258
CBX4	1891.93	-1.09373	0.133224	-8.20974	2.21664e-16	2.13593e-15
LOC102724164	170.877	-1.09365	0.283025	-3.86415	0.000111477	0.000343396
CACNA2D2	56.7834	-1.09327	0.367255	-2.97686	0.00291216	0.00705926
ZNF500	210.634	-1.09287	0.157267	-6.94913	3.67552e-12	2.55458e-11
GLI4	322.751	-1.09256	0.132474	-8.24736	1.61938e-16	1.57512e-15
UBOX5	132.865	-1.09238	0.184254	-5.9287	3.05348e-09	1.64142e-08
PRR16	29.3864	-1.09231	0.348287	-3.13622	0.00171138	0.00434167
LOC339192	322.792	-1.09219	0.286775	-3.80853	0.000139794	0.00042298
KCNJ10	87.2593	-1.09207	0.226036	-4.83143	1.35556e-06	5.40538e-06
CTSK	76.5985	-1.09159	0.23244	-4.69625	2.64987e-06	1.02072e-05
ST3GAL1	808.087	-1.09148	0.107537	-10.1498	3.32136e-24	5.11219e-23
BAMBI	262.464	-1.08955	0.168889	-6.45124	1.10935e-10	6.77258e-10
LMO4	572.464	-1.08881	0.11911	-9.14119	6.17682e-20	7.51e-19
SLC16A5	79.6993	-1.08865	0.224347	-4.8525	1.21912e-06	4.88859e-06
TMED8	2163.25	-1.08858	0.114427	-9.51329	1.84732e-21	2.4708e-20
OTX1	147.611	-1.0872	0.207709	-5.23422	1.6568e-07	7.34081e-07
STARD9	617.93	-1.08709	0.113514	-9.57674	1.00159e-21	1.3612e-20
EFEMP2	159.443	-1.08675	0.359145	-3.02594	0.0024786	0.00609174
PKIG	259.66	-1.08519	0.152897	-7.09748	1.27049e-12	9.16631e-12
ZNF767	287.915	-1.08511	0.25281	-4.2922	1.76915e-05	6.12041e-05
FRAT1	130.273	-1.08428	0.203194	-5.33617	9.49322e-08	4.3195e-07
NEGR1	25.7738	-1.08427	0.446015	-2.43102	0.0150563	0.0314428
CLEC11A	1309.96	-1.08349	0.167473	-6.46964	9.82358e-11	6.02915e-10
CCBL1	350.373	-1.08346	0.18872	-5.7411	9.40617e-09	4.82729e-08
RNF139-AS1	26.8529	-1.08293	0.439489	-2.46407	0.0137369	0.028961
KIAA1841	155.765	-1.08255	0.20008	-5.41059	6.28172e-08	2.92266e-07
C6orf89	2246.8	-1.08215	0.107226	-10.0922	5.98256e-24	9.08781e-23
NEK2	1112.23	-1.08188	0.226295	-4.78082	1.74583e-06	6.87309e-06
FAM173A	454.634	-1.08175	0.166225	-6.50773	7.62954e-11	4.73894e-10
MTCP1	85.3345	-1.08153	0.238968	-4.52586	6.01506e-06	2.22194e-05
PSIP1	3712.33	-1.08113	0.119826	-9.02245	1.83934e-19	2.18207e-18
RNFT2	184.405	-1.08076	0.157726	-6.85213	7.2757e-12	4.93854e-11
RP11-85F14.5	36.5095	-1.08029	0.362215	-2.98245	0.00285947	0.00694059
NUDT22	594.594	-1.08024	0.122806	-8.79632	1.41373e-18	1.59177e-17
DENND2D	269.934	-1.08001	0.154119	-7.00762	2.424e-12	1.70774e-11
DNAH2	31.4844	-1.07965	0.351562	-3.07102	0.0021333	0.00530897
GLTSCR1	358.39	-1.07965	0.160497	-6.7269	1.73311e-11	1.13894e-10
MAGEE1	221.102	-1.07927	0.15663	-6.89057	5.55706e-12	3.81096e-11
PSTPIP2	47.0523	-1.07843	0.279516	-3.8582	0.000114225	0.000351396
NUGGC	108.825	-1.07832	0.193404	-5.57547	2.46865e-08	1.2101e-07
RP11-761I4.3	20.002	-1.07755	0.440921	-2.44387	0.0145308	0.0304755
PAQR7	172.246	-1.07722	0.175886	-6.12456	9.09334e-10	5.11927e-09
CNTNAP1	360.98	-1.07664	0.1658	-6.4936	8.38102e-11	5.18318e-10
GNGT2	194.203	-1.07512	0.211281	-5.08858	3.60763e-07	1.53686e-06
TMEM164	900.067	-1.07508	0.115881	-9.27746	1.73565e-20	2.18906e-19
EIF2AK4	1690.22	-1.07431	0.105705	-10.1633	2.89116e-24	4.476e-23
SETDB2	357.684	-1.0742	0.137039	-7.83866	4.55397e-15	3.96827e-14
LOC101929747	57.9797	-1.07389	0.278504	-3.85591	0.000115301	0.000354411
AC011747.7	19.5779	-1.07373	0.424805	-2.52757	0.0114854	0.0246706
CEP192	1266.91	-1.07337	0.131058	-8.18998	2.61269e-16	2.49821e-15
LOC102723345	15.0098	-1.07326	0.469915	-2.28395	0.0223747	0.0449672
SPIRE1	25.0023	-1.07295	0.388702	-2.76035	0.00577402	0.0131652
GSE1	4626.8	-1.07276	0.102592	-10.4565	1.36856e-25	2.26e-24
FAM115C	59.8565	-1.07251	0.290039	-3.6978	0.000217479	0.000638181
GRIN2C	17.8579	-1.07131	0.423121	-2.53193	0.0113437	0.0243916
ZNF790	92.8495	-1.07081	0.231242	-4.6307	3.64434e-06	1.37695e-05
CCDC15	237.179	-1.07055	0.164777	-6.49696	8.19617e-11	5.07561e-10
CTNNBIP1	676.849	-1.07048	0.122891	-8.7108	3.01732e-18	3.33071e-17
SOX13	37.0847	-1.07038	0.345269	-3.10013	0.00193436	0.00484778
TMEM143	305.63	-1.06924	0.148015	-7.22387	5.05286e-13	3.75939e-12
KIAA2013	920.178	-1.06891	0.12705	-8.41334	3.98491e-17	4.04766e-16
KDM4C	1257.18	-1.06871	0.148765	-7.18388	6.77584e-13	4.99728e-12
RFX3	134.984	-1.06749	0.195747	-5.4534	4.94149e-08	2.33655e-07
APBA1	18.7805	-1.0673	0.417853	-2.55423	0.0106421	0.023027
TNRC6B	970.23	-1.06713	0.128269	-8.31944	8.83784e-17	8.73813e-16
NSG1	370.734	-1.06523	0.138787	-7.67528	1.65052e-14	1.37442e-13
SEPT5-GP1BB	142.045	-1.06376	0.213831	-4.97478	6.53229e-07	2.70644e-06
FUK	190.449	-1.06329	0.163555	-6.50109	7.97386e-11	4.94289e-10
DYNC1H1	2305.87	-1.06188	0.0984015	-10.7913	3.78523e-27	6.67884e-26
SEMA3F	51.7619	-1.06177	0.267319	-3.97193	7.12932e-05	0.000225444
CUL9	1237.97	-1.06161	0.104039	-10.2039	1.90444e-24	2.97566e-23
MYBL1	446.374	-1.06142	0.202556	-5.24011	1.6048e-07	7.12808e-07
CAPS	88.1561	-1.06111	0.249804	-4.24778	2.15895e-05	7.38655e-05
ZEB1-AS1	176.321	-1.06079	0.262209	-4.04559	5.21924e-05	0.000168163
TTLL9	99.6062	-1.06065	0.365728	-2.90011	0.00373029	0.0088598
STC2	1297.39	-1.06008	0.269896	-3.92771	8.5757e-05	0.00026844
RP11-305E17.6	18.438	-1.06007	0.440315	-2.40753	0.0160609	0.0333509
DKFZP586I1420	178.46	-1.05999	0.249972	-4.24045	2.23068e-05	7.61934e-05
N4BP2L1	494.054	-1.0599	0.30809	-3.44022	0.000581237	0.0015936
GUCA1B	32.4427	-1.0595	0.354325	-2.99019	0.00278806	0.00677655
ESPN	149.787	-1.05933	0.200909	-5.27268	1.34449e-07	6.02896e-07
EMR2	221.333	-1.05887	0.168288	-6.292	3.13403e-10	1.83846e-09
SEPW1	1498.6	-1.05877	0.131641	-8.04285	8.77719e-16	8.06841e-15
WHAMMP1	43.4106	-1.05843	0.315007	-3.36	0.000779415	0.00209369
TLE6	93.3573	-1.05834	0.231468	-4.57228	4.82452e-06	1.80197e-05
ENDOD1	1233.72	-1.05829	0.0925376	-11.4363	2.75358e-30	5.65884e-29
LETMD1	669.841	-1.0582	0.18809	-5.62603	1.84408e-08	9.17251e-08
HPS3	722.462	-1.05757	0.13269	-7.97023	1.58376e-15	1.42751e-14
RAB43	147.031	-1.05736	0.201652	-5.2435	1.57557e-07	7.00763e-07
RNF187	2654.3	-1.05704	0.0811523	-13.0254	8.77043e-39	2.44283e-37
ZFP30	324.427	-1.05643	0.143541	-7.35975	1.84255e-13	1.42037e-12
ATP6V0E2	1023.67	-1.05623	0.170489	-6.19529	5.81765e-10	3.33787e-09
MAST2	1150.81	-1.05467	0.188646	-5.59073	2.26114e-08	1.11278e-07
TRIM22	313.302	-1.054	0.143538	-7.34301	2.08844e-13	1.60393e-12
KIF21B	2213.77	-1.05343	0.128625	-8.18998	2.61278e-16	2.49821e-15
GABRB3	476.597	-1.05338	0.180625	-5.83186	5.48137e-09	2.8807e-08
SNX21	48.121	-1.05303	0.275861	-3.81726	0.000134943	0.000409637
ZNF480	571.392	-1.05269	0.196876	-5.347	8.94235e-08	4.08485e-07
FLJ37453	100.451	-1.05203	0.214301	-4.90912	9.1488e-07	3.72897e-06
AZI1	1199.77	-1.05156	0.170338	-6.17337	6.68508e-10	3.80734e-09
SLC12A4	751.331	-1.05145	0.140144	-7.50261	6.2559e-14	4.99236e-13
FAM53A	28.7932	-1.051	0.347283	-3.02636	0.00247515	0.00608566
IFITM3	173.963	-1.05086	0.163864	-6.41303	1.42653e-10	8.6382e-10
SPATS2L	527.106	-1.05058	0.119394	-8.79929	1.37689e-18	1.55311e-17
LOC102606465	43.1106	-1.05028	0.290252	-3.61853	0.000296285	0.000850097
TSNARE1	337.023	-1.05015	0.152575	-6.88282	5.86781e-12	4.01371e-11
FAM160B1	1653.25	-1.04949	0.11089	-9.46424	2.95701e-21	3.90998e-20
TRO	963.136	-1.049	0.189324	-5.54078	3.01127e-08	1.46104e-07
PPM1M	1058.07	-1.04884	0.105013	-9.98775	1.72445e-23	2.55071e-22
LOC257396	29.5154	-1.04812	0.442678	-2.36768	0.0179002	0.036762
RSBN1	944.974	-1.04773	0.254289	-4.12022	3.78511e-05	0.00012488
PALM	465.244	-1.04755	0.236229	-4.43448	9.22941e-06	3.32681e-05
SLC4A8	124.601	-1.0471	0.21168	-4.94662	7.55114e-07	3.10839e-06
GDF9	60.6852	-1.04647	0.364439	-2.87147	0.00408573	0.00963136
2022-03-02	280.714	-1.0463	0.134108	-7.80188	6.09928e-15	5.2679e-14
TRIM66	502.113	-1.04515	0.114588	-9.12088	7.45172e-20	9.03053e-19
CELSR2	715.247	-1.04477	0.104368	-10.0105	1.3708e-23	2.04388e-22
CASP6	290.037	-1.04362	0.18256	-5.7166	1.08673e-08	5.53892e-08
MZB1	1084	-1.04302	0.120822	-8.63268	5.99317e-18	6.50357e-17
LOC391322	20.9277	-1.0423	0.457012	-2.28069	0.0225669	0.045329
LOC100996301	114.823	-1.04173	0.258514	-4.02969	5.58515e-05	0.000179052
SHQ1	2404.97	-1.04171	0.0928965	-11.2137	3.49398e-29	6.7757e-28
ARHGAP35	1219.63	-1.04145	0.126932	-8.20483	2.30913e-16	2.22044e-15
ARNTL	673.715	-1.0414	0.137925	-7.55051	4.33569e-14	3.50211e-13
LYRM9	73.3917	-1.0398	0.253596	-4.1002	4.12784e-05	0.000135322
CD5	1670.12	-1.03894	0.146289	-7.10199	1.22975e-12	8.87926e-12
FAM227A	99.6227	-1.03829	0.228986	-4.5343	5.77951e-06	2.1376e-05
PASK	1337.76	-1.03777	0.124714	-8.3212	8.70737e-17	8.61371e-16
ADAD2	95.376	-1.03741	0.211854	-4.89683	9.73955e-07	3.95241e-06
CARD14	23.6286	-1.0369	0.408132	-2.54059	0.0110666	0.0238453
PWWP2B	311.3	-1.03635	0.133923	-7.7384	1.00679e-14	8.52902e-14
LOC101927974	32.1551	-1.0363	0.36986	-2.80186	0.00508089	0.0117317
CYFIP2	7350.41	-1.03623	0.153479	-6.75163	1.46194e-11	9.67232e-11
SHPK	537.391	-1.03615	0.110651	-9.36411	7.66924e-21	9.86697e-20
C4orf27	1408.25	-1.03584	0.102474	-10.1083	5.07453e-24	7.75922e-23
CD1A	529.002	-1.03558	0.179058	-5.7835	7.31625e-09	3.79457e-08
TTLL1	227.256	-1.03389	0.152162	-6.79464	1.08584e-11	7.26682e-11
C17orf58	143.94	-1.03311	0.201611	-5.12427	2.98686e-07	1.28508e-06
SSBP3	1552.07	-1.03309	0.0945969	-10.9209	9.15424e-28	1.67225e-26
TSPAN2	419.15	-1.03271	0.132493	-7.7945	6.46619e-15	5.57701e-14
CDK5RAP3	4387.48	-1.03242	0.187462	-5.50736	3.64262e-08	1.75e-07
SYTL1	848.676	-1.03179	0.115904	-8.90212	5.47888e-19	6.31039e-18
UNC93B1	387.792	-1.03103	0.126433	-8.15473	3.49974e-16	3.30881e-15
SLC4A7	1820.95	-1.0308	0.186494	-5.52725	3.2528e-08	1.57085e-07
TRIM14	1431	-1.03079	0.132668	-7.76965	7.87006e-15	6.73779e-14
SRPK2	1299.43	-1.03075	0.121975	-8.45049	2.90078e-17	2.98068e-16
LIN7B	207.156	-1.03048	0.264223	-3.90005	9.61727e-05	0.000299129
RAG1	49.0941	-1.03029	0.281388	-3.66146	0.000250783	0.000728659
STK33	126.068	-1.02973	0.200454	-5.137	2.79164e-07	1.20528e-06
NOD1	535.061	-1.02963	0.129696	-7.93877	2.04199e-15	1.82649e-14
KRTCAP3	35.6556	-1.02956	0.357923	-2.8765	0.00402113	0.00949232
MIEF2	240.696	-1.02955	0.219844	-4.68308	2.82599e-06	1.08482e-05
NPHP3	98.0482	-1.02941	0.255974	-4.02155	5.78163e-05	0.000184873
GYS1	2297.02	-1.02843	0.125013	-8.22654	1.92692e-16	1.86255e-15
SUFU	393.142	-1.02838	0.180933	-5.68379	1.3174e-08	6.6327e-08
ZNF322	91.0284	-1.02736	0.241255	-4.25841	2.05889e-05	7.05851e-05
KIAA1279	579.507	-1.02715	0.124399	-8.25689	1.4952e-16	1.45586e-15
BCHE	309.954	-1.02709	0.149131	-6.88715	5.69228e-12	3.89507e-11
NUDT8	674.514	-1.02587	0.123461	-8.30926	9.63021e-17	9.50133e-16
EEF2K	570.038	-1.02524	0.105079	-9.75692	1.72315e-22	2.42889e-21
CAT	1136.03	-1.02464	0.087352	-11.73	8.94525e-32	1.93915e-30
STX16	1614.3	-1.02426	0.205654	-4.98048	6.34273e-07	2.63554e-06
DHRS4L2	424.269	-1.02419	0.117618	-8.70779	3.09864e-18	3.41844e-17
FAM195A	563.092	-1.02348	0.108916	-9.39699	5.61437e-21	7.2787e-20
BTNL9	328.345	-1.0227	0.21263	-4.80977	1.51102e-06	5.99697e-06
TNFRSF1A	1344.29	-1.02215	0.0961852	-10.6269	2.23308e-26	3.82009e-25
NMRK1	343.529	-1.0216	0.143233	-7.13244	9.86031e-13	7.1809e-12
C3orf67	150.218	-1.02072	0.217397	-4.69521	2.66339e-06	1.0255e-05
ACN9	381.346	-1.02021	0.143956	-7.08697	1.37083e-12	9.8672e-12
HUNK	1012.56	-1.01953	0.153283	-6.65125	2.90621e-11	1.87471e-10
RP11-84C10.4	28.4483	-1.01932	0.371499	-2.7438	0.00607324	0.0137899
SOCS2-AS1	17.6336	-1.01881	0.454909	-2.23959	0.0251174	0.0498432
KIAA1522	72.3626	-1.01825	0.290582	-3.50418	0.000458019	0.00127937
NME4	2645.32	-1.01815	0.0933551	-10.9062	1.07688e-27	1.95184e-26
GJA3	291.191	-1.01811	0.151109	-6.73758	1.61049e-11	1.06136e-10
ZNF711	811.315	-1.01782	0.133379	-7.63098	2.32969e-14	1.91849e-13
TBC1D31	497.309	-1.01755	0.119406	-8.52175	1.57162e-17	1.64772e-16
TIA1	1827.49	-1.01736	0.0822339	-12.3715	3.72852e-35	9.1868e-34
LOC102723328	49.982	-1.01735	0.267549	-3.80246	0.000143268	0.000432645
FDFT1	9759.79	-1.0173	0.219719	-4.63	3.65659e-06	1.3813e-05
ARHGEF11	924.793	-1.01712	0.118894	-8.55483	1.18042e-17	1.25313e-16
ARHGAP32	429.755	-1.016	0.143603	-7.07507	1.49368e-12	1.07018e-11
TNFRSF13C	19.4965	-1.01556	0.423364	-2.39879	0.0164491	0.034091
LOC100128361	38.0796	-1.01556	0.385816	-2.63225	0.00848224	0.0186998
MARVELD1	443.39	-1.01535	0.129089	-7.86548	3.67696e-15	3.22219e-14
RUFY3	1049.23	-1.01464	0.151524	-6.69619	2.13923e-11	1.3935e-10
ZBTB16	331.757	-1.01447	0.128377	-7.90223	2.73953e-15	2.42819e-14
AK7	36.5082	-1.01409	0.323951	-3.13037	0.00174585	0.00441826
ZNF519	269.873	-1.01405	0.240249	-4.22086	2.43377e-05	8.27651e-05
BNIP3	4846.02	-1.01333	0.296537	-3.41721	0.000632673	0.00172546
OCEL1	169.591	-1.0133	0.162508	-6.23538	4.50684e-10	2.60835e-09
KIF18A	891.008	-1.01327	0.210517	-4.81326	1.48489e-06	5.89827e-06
TUBA4A	1010.03	-1.01314	0.135973	-7.451	9.26352e-14	7.31086e-13
AKNA	2269.04	-1.01284	0.0844949	-11.987	4.15826e-33	9.53731e-32
IDH1	782.811	-1.01282	0.139415	-7.26481	3.73561e-13	2.80745e-12
BICD1	666.105	-1.01273	0.143241	-7.07009	1.54837e-12	1.10807e-11
ZNF319	284.264	-1.01265	0.181335	-5.5844	2.34505e-08	1.15102e-07
CCDC102B	45.4909	-1.01234	0.280274	-3.61198	0.000303871	0.000870787
SF3B1	8346.69	-1.01199	0.103144	-9.81144	1.00524e-22	1.43545e-21
POLG2	332.592	-1.01184	0.153213	-6.60413	3.99869e-11	2.55547e-10
MEF2BNB-MEF2B	19.7139	-1.01122	0.438233	-2.3075	0.0210271	0.0424934
RP11-260E18.1	29.4555	-1.01099	0.356239	-2.83796	0.00454026	0.0106059
SS18L1	637.232	-1.01091	0.162989	-6.20234	5.56315e-10	3.20439e-09
TIGD3	57.0984	-1.01027	0.321743	-3.13998	0.00168961	0.00429058
CDAN1	1086.88	-1.00927	0.15668	-6.44163	1.182e-10	7.20443e-10
FBXO2	41.4829	-1.00923	0.372685	-2.708	0.00676898	0.0152024
GPHN	680.258	-1.00905	0.112008	-9.00878	2.08363e-19	2.45775e-18
SSSCA1-AS1	52.9254	-1.00888	0.314231	-3.21064	0.00132438	0.00342439
PPP2R5B	885.875	-1.00854	0.23108	-4.36449	1.27422e-05	4.49961e-05
HDAC11	164.112	-1.00804	0.171327	-5.8837	4.01196e-09	2.13688e-08
BLK	427.727	-1.00794	0.16161	-6.23685	4.46457e-10	2.5855e-09
ALKBH5	2371.21	-1.00779	0.162556	-6.19964	5.65919e-10	3.255e-09
TOM1L2	312.669	-1.00716	0.15071	-6.68275	2.34499e-11	1.52272e-10
LOC102723510	38	-1.00707	0.319493	-3.15209	0.00162106	0.00413172
IMPDH1	1585.94	-1.007	0.114696	-8.77974	1.63857e-18	1.83493e-17
SNN	553.842	-1.00653	0.134985	-7.45659	8.87924e-14	7.01653e-13
FTO	533.73	-1.00576	0.117143	-8.58572	9.02687e-18	9.69931e-17
TCF4	274.527	-1.00553	0.149991	-6.70392	2.02903e-11	1.32543e-10
NEK7	4104.38	-1.00476	0.124446	-8.07389	6.8096e-16	6.2971e-15
INTS1	5376.22	-1.00476	0.122747	-8.18563	2.70884e-16	2.58341e-15
C6orf147	74.4764	-1.00468	0.248127	-4.04906	5.14227e-05	0.000165914
TSPAN7	7926.54	-1.0046	0.12849	-7.81849	5.34612e-15	4.63896e-14
C17orf85	1471.57	-1.00458	0.0965347	-10.4064	2.31798e-25	3.7908e-24
NEAT1	638.849	-1.00429	0.244858	-4.10151	4.1047e-05	0.000134587
TMEM42	180.628	-1.004	0.200309	-5.01228	5.37903e-07	2.24919e-06
HDGFRP2	2195.87	-1.00316	0.142492	-7.04013	1.92057e-12	1.36601e-11
GTF3C5	2969.33	-1.00296	0.152409	-6.58069	4.6828e-11	2.97223e-10
WIPI1	65.5858	-1.00228	0.357856	-2.8008	0.00509756	0.0117672
ELOVL4	1049.55	-1.00182	0.11154	-8.98163	2.66778e-19	3.12694e-18
LOC389765	63.1518	-1.00073	0.280812	-3.56369	0.000365673	0.00103512
LSAMP	146.829	-1.00067	0.198655	-5.03724	4.72295e-07	1.98379e-06
TRAPPC9	784.078	-1.00062	0.141812	-7.05596	1.71415e-12	1.22247e-11
MPZL1	1446.06	-1.00054	0.0863387	-11.5885	4.71116e-31	9.99133e-30
REEP6	178.289	-1.00037	0.158444	-6.31371	2.72426e-10	1.60824e-09
SLC25A1	2222.83	-1.00023	0.167166	-5.98345	2.18466e-09	1.19162e-08
SLC2A1	2666.44	-1.00012	0.41687	-2.39912	0.0164343	0.0340678
TPO	186.609	-0.999872	0.196371	-5.09174	3.54785e-07	1.51278e-06
FADS2	5249.75	-0.99956	0.142957	-6.99204	2.70923e-12	1.90435e-11
OGFOD2	628.938	-0.999333	0.120707	-8.27903	1.24184e-16	1.21874e-15
GPR155	394.96	-0.998964	0.166457	-6.00135	1.95685e-09	1.07145e-08
PRPH	24.9667	-0.998708	0.388687	-2.56944	0.0101864	0.0221206
CLIC2	26.8323	-0.998351	0.378537	-2.63739	0.00835463	0.0184338
ORC3	757.07	-0.997988	0.100119	-9.96805	2.10308e-23	3.10088e-22
SGSM2	1763.59	-0.997713	0.10652	-9.36644	7.50195e-21	9.66513e-20
GXYLT1	894.748	-0.997552	0.125015	-7.97945	1.46986e-15	1.32945e-14
NBAS	1737.59	-0.997528	0.103843	-9.60613	7.53271e-22	1.03051e-20
TAZ	876.634	-0.996579	0.114354	-8.71487	2.91089e-18	3.21698e-17
FAIM3	107.68	-0.99656	0.259529	-3.83988	0.000123092	0.000376058
LRRC61	450.037	-0.996504	0.1285	-7.75492	8.83963e-15	7.53315e-14
SNTA1	514.856	-0.996217	0.168402	-5.9157	3.30465e-09	1.77183e-08
ZDHHC24	399.438	-0.995304	0.11796	-8.43763	3.23823e-17	3.30913e-16
SNHG19	259.658	-0.994905	0.181195	-5.4908	4.00126e-08	1.90946e-07
GRID2IP	37.7006	-0.9949	0.319631	-3.11265	0.00185416	0.00466756
CRYZL1	409.563	-0.99444	0.119739	-8.30506	9.97694e-17	9.82776e-16
LOC150776	1038	-0.993838	0.188628	-5.26878	1.37337e-07	6.15103e-07
BCL7A	1831.37	-0.993785	0.108574	-9.15309	5.53299e-20	6.75818e-19
MPHOSPH9	1810.18	-0.992639	0.135955	-7.30122	2.85167e-13	2.16414e-12
KSR2	647.157	-0.992346	0.110015	-9.0201	1.87914e-19	2.22363e-18
PCIF1	1298.64	-0.992276	0.114785	-8.64461	5.39871e-18	5.87565e-17
DNASE2	597.837	-0.992236	0.117624	-8.43569	3.29253e-17	3.36276e-16
CRYL1	394.146	-0.991759	0.189544	-5.23234	1.67373e-07	7.40876e-07
BHLHB9	38.196	-0.991621	0.348362	-2.84653	0.00441992	0.0103535
SKIDA1	28.4286	-0.991139	0.401206	-2.4704	0.0134962	0.028502
CR2	215.746	-0.990955	0.240525	-4.11996	3.78939e-05	0.000124932
RAC3	693.047	-0.990813	0.128026	-7.73916	1.00075e-14	8.48451e-14
FAM69B	478.114	-0.988495	0.135458	-7.29742	2.93348e-13	2.2226e-12
RHBDL1	243.438	-0.988103	0.229796	-4.29992	1.70859e-05	5.92317e-05
UBR5	4494.99	-0.987883	0.205264	-4.81274	1.48878e-06	5.91246e-06
C9orf173	27.6124	-0.986799	0.384866	-2.56401	0.0103471	0.0224436
DUSP15	64.6784	-0.986384	0.255422	-3.86178	0.000112564	0.000346513
PDE5A	109.496	-0.986354	0.299927	-3.28865	0.00100671	0.00265738
GRAP	387.501	-0.986328	0.143442	-6.87614	6.1495e-12	4.2002e-11
TK2	419.186	-0.985603	0.154211	-6.39126	1.6452e-10	9.9171e-10
ATP6AP1L	28.7068	-0.985591	0.397287	-2.4808	0.0131087	0.027809
CC2D1A	1203.57	-0.984703	0.142678	-6.90157	5.14305e-12	3.53749e-11
TSPAN4	292.71	-0.984035	0.128042	-7.68524	1.52707e-14	1.27391e-13
GMIP	957.139	-0.983961	0.114647	-8.58253	9.28076e-18	9.96635e-17
CD4	1902.88	-0.983872	0.260647	-3.77473	0.000160181	0.000480673
KMT2E	1951.43	-0.983577	0.187375	-5.24924	1.52731e-07	6.80278e-07
SPG11	1176.37	-0.983281	0.124701	-7.8851	3.14295e-15	2.7765e-14
ZNF462	482.426	-0.983095	0.183423	-5.35972	8.33505e-08	3.82626e-07
PLAG1	548.728	-0.982744	0.228985	-4.29174	1.77279e-05	6.13084e-05
STK36	348.192	-0.982493	0.152147	-6.45753	1.06427e-10	6.50712e-10
PCNXL2	243.961	-0.982223	0.157459	-6.23795	4.43344e-10	2.56987e-09
ZNF292	2023.16	-0.982148	0.249681	-3.93361	8.36797e-05	0.000262159
PSMD6-AS2	42.1864	-0.981915	0.371991	-2.63962	0.00829985	0.0183303
OTOF	156.953	-0.981638	0.194019	-5.05949	4.20383e-07	1.7778e-06
NARF	3101.69	-0.981567	0.147689	-6.64616	3.00836e-11	1.93523e-10
GLG1	5675.23	-0.981071	0.108765	-9.0201	1.87916e-19	2.22363e-18
EFTUD1	933.221	-0.98086	0.112724	-8.70146	3.27638e-18	3.61023e-17
GPRC5B	18.0306	-0.980483	0.411644	-2.38187	0.0172248	0.0355519
NAV1	51.9004	-0.980228	0.284375	-3.44695	0.000566948	0.0015581
ABHD8	604.43	-0.980164	0.158963	-6.16597	7.00517e-10	3.98353e-09
MYRF	280.42	-0.979367	0.165969	-5.90089	3.61543e-09	1.93121e-08
POLI	259.832	-0.97788	0.155686	-6.28112	3.36151e-10	1.96817e-09
C5orf45	83.8074	-0.977306	0.258876	-3.77519	0.000159887	0.000479868
PLIN2	361.24	-0.976797	0.153924	-6.34596	2.21049e-10	1.31287e-09
HMMR	995.778	-0.976781	0.189925	-5.14297	2.70429e-07	1.16947e-06
HK1	3030.27	-0.976271	0.150431	-6.48984	8.59263e-11	5.30345e-10
SPTBN2	977.372	-0.975349	0.189473	-5.14768	2.63727e-07	1.14181e-06
C1QL1	626.549	-0.975287	0.182131	-5.35486	8.56243e-08	3.92095e-07
GOLGA6L9	31.3277	-0.974989	0.360446	-2.70496	0.00683134	0.0153276
GIPC3	92.3272	-0.974336	0.224561	-4.33885	1.43232e-05	5.02449e-05
RHOT1	1232.55	-0.974285	0.130466	-7.46773	8.15924e-14	6.47235e-13
MTIF3	491.803	-0.974209	0.127808	-7.62244	2.48923e-14	2.04443e-13
CPT1A	2179.53	-0.974138	0.10911	-8.92807	4.33496e-19	5.02088e-18
HIRA	1567.57	-0.973996	0.103573	-9.40397	5.25434e-21	6.82623e-20
HDHD1	378.514	-0.973926	0.17882	-5.44639	5.14021e-08	2.42557e-07
PLXDC1	27.1462	-0.972732	0.431566	-2.25396	0.0241989	0.0482006
FAM102B	933.51	-0.972451	0.188349	-5.16302	2.42993e-07	1.05796e-06
DAPP1	56.7752	-0.971845	0.278601	-3.4883	0.000486094	0.00135129
LIPT1	100.218	-0.971542	0.243068	-3.99699	6.41518e-05	0.000204008
E2F7	1115.07	-0.97134	0.101123	-9.60553	7.57688e-22	1.03579e-20
AMY2B	45.1556	-0.970679	0.346115	-2.8045	0.00503946	0.0116418
NUDT14	248.104	-0.970584	0.168934	-5.74534	9.17353e-09	4.7118e-08
GALK2	437.975	-0.970153	0.138833	-6.98792	2.78997e-12	1.95815e-11
NLRX1	726.744	-0.969632	0.118218	-8.20207	2.36291e-16	2.26981e-15
LOC100129550	54.512	-0.969529	0.321431	-3.01629	0.00255887	0.00627325
LINC01003	133.532	-0.969147	0.207319	-4.67467	2.9443e-06	1.12735e-05
XRCC1	1326.45	-0.969042	0.152636	-6.34873	2.171e-10	1.29069e-09
RAD21	14361.3	-0.968979	0.119668	-8.09726	5.62109e-16	5.23452e-15
MST1	198.925	-0.968523	0.296323	-3.26847	0.00108129	0.00283892
SWI5	446.309	-0.968172	0.142822	-6.77889	1.21099e-11	8.07822e-11
RALGPS2	563.029	-0.967209	0.204701	-4.72499	2.30127e-06	8.93107e-06
H1FX	5429.48	-0.96708	0.163483	-5.91549	3.30894e-09	1.77362e-08
CKAP4	524.054	-0.966805	0.141358	-6.83941	7.95173e-12	5.38169e-11
THBS3	306.713	-0.966582	0.180329	-5.3601	8.31774e-08	3.81925e-07
GLI1	139.579	-0.966446	0.190928	-5.06184	4.15227e-07	1.758e-06
ROGDI	239.326	-0.965602	0.153289	-6.29922	2.99138e-10	1.757e-09
HARS2	652.466	-0.963671	0.157245	-6.12846	8.87362e-10	5.00013e-09
AJUBA	379.933	-0.963572	0.168675	-5.7126	1.11262e-08	5.65536e-08
FLJ44342	492.822	-0.9629	0.198086	-4.86103	1.16776e-06	4.69277e-06
SPIDR	889.218	-0.961532	0.158929	-6.05009	1.44763e-09	8.01853e-09
TMEM79	263.429	-0.9609	0.193432	-4.96763	6.77758e-07	2.80432e-06
TANC2	712.91	-0.960672	0.133017	-7.22216	5.11682e-13	3.80393e-12
PLEKHG4B	86.8812	-0.960281	0.216026	-4.44521	8.78053e-06	3.17303e-05
HAUS4	1602.18	-0.959732	0.178237	-5.38458	7.26157e-08	3.35848e-07
NR2C2	1740.66	-0.959117	0.139262	-6.88716	5.69186e-12	3.89507e-11
PRRT2	29.2477	-0.957571	0.337697	-2.83559	0.00457406	0.0106728
HOOK2	334.982	-0.956802	0.148788	-6.43064	1.27068e-10	7.72472e-10
ERAP2	771.698	-0.956463	0.108163	-8.84277	9.33755e-19	1.061e-17
DEDD2	626.083	-0.955459	0.206213	-4.63337	3.59768e-06	1.361e-05
PPOX	155.919	-0.955376	0.198991	-4.80111	1.57792e-06	6.24646e-06
KRBA2	50.5419	-0.955183	0.278253	-3.43279	0.000597405	0.00163575
ARSK	248.38	-0.955172	0.175503	-5.44248	5.25428e-08	2.47437e-07
BOLA3-AS1	35.0983	-0.955071	0.343865	-2.77746	0.00547861	0.0125625
BCOR	3614.84	-0.955009	0.130759	-7.30356	2.80255e-13	2.12861e-12
ACY3	49.1841	-0.954702	0.289726	-3.29519	0.000983559	0.00260034
C20orf96	519.971	-0.954358	0.149381	-6.38877	1.6723e-10	1.00707e-09
SYCP2	2278.57	-0.953464	0.0988689	-9.64372	5.22594e-22	7.21841e-21
GPR137C	26.3887	-0.953275	0.408867	-2.33151	0.0197267	0.0401054
MCHR1	23.2628	-0.951999	0.397188	-2.39685	0.0165369	0.0342424
PTEN	1478.44	-0.951827	0.133314	-7.13972	9.35203e-13	6.83147e-12
BCKDK	836.515	-0.951767	0.149985	-6.34576	2.21335e-10	1.31372e-09
LOC100506548	474.193	-0.951648	0.256003	-3.71734	0.000201332	0.000594084
TMEM101	612.815	-0.95135	0.106362	-8.94444	3.73847e-19	4.34626e-18
ZNF438	249.579	-0.951118	0.139894	-6.79883	1.05474e-11	7.0689e-11
USP30	429.869	-0.948934	0.139865	-6.78467	1.16356e-11	7.77015e-11
CRAT	781.68	-0.947992	0.148573	-6.38066	1.76325e-10	1.06012e-09
LOC100996404	18.8701	-0.947737	0.421436	-2.24883	0.0245235	0.0488052
SIX5	407.24	-0.946504	0.136619	-6.92805	4.2667e-12	2.9533e-11
SPTAN1	7467.98	-0.946464	0.108061	-8.75861	1.97665e-18	2.20686e-17
LIMA1	1136.06	-0.946405	0.140985	-6.71279	1.90933e-11	1.249e-10
FAM178A	1667.25	-0.946031	0.123675	-7.64935	2.01994e-14	1.67082e-13
PKD1	2774.67	-0.945369	0.0858866	-11.0072	3.52887e-28	6.52331e-27
LOC101927151	102.58	-0.945171	0.213472	-4.42761	9.52827e-06	3.42723e-05
DMXL2	1497.06	-0.944253	0.0996274	-9.47784	2.59595e-21	3.44483e-20
FANCM	464.09	-0.94423	0.134981	-6.9953	2.647e-12	1.86131e-11
ST6GAL1	679.641	-0.943532	0.11836	-7.97173	1.56475e-15	1.41184e-14
TMTC2	157.982	-0.942865	0.25695	-3.66946	0.000243068	0.000707681
MSL2	1820.71	-0.942516	0.133979	-7.0348	1.99543e-12	1.41547e-11
BCAN	118.913	-0.942117	0.273799	-3.44091	0.000579759	0.00159001
HSF4	778.102	-0.941902	0.170953	-5.5097	3.59436e-08	1.72771e-07
HOXC10	743	-0.941677	0.117999	-7.98036	1.4591e-15	1.32037e-14
RND2	163.429	-0.941508	0.179699	-5.23935	1.61145e-07	7.15525e-07
ST6GALNAC4	202.44	-0.94146	0.164721	-5.71549	1.09391e-08	5.56937e-08
AKR1C6P	272.884	-0.940964	0.147849	-6.36435	1.9612e-10	1.17192e-09
[truncated: 4,825 more rows]

## Sheet: LKO vs LKO PMA_Ion DEG
Gene ID	Mean normalized counts	FC log2	log2 FC standard error	Wald statistic	p-value	Adjusted p-value
RAG2	76.1804	-4.70002	0.346251	-13.574	5.71012e-42	7.66405e-41
LRRC38	38.723	-3.90384	0.38905	-10.0343	1.07729e-23	8.46654e-23
SMAD6	143.49	-3.72816	0.21997	-16.9485	1.97261e-64	4.02966e-63
CNR2	234.293	-3.56931	0.16786	-21.2636	2.46797e-100	8.1695e-99
HIST1H1D	45.9233	-3.45645	0.33915	-10.1915	2.16415e-24	1.74718e-23
SELPLG	945.342	-3.43259	0.0846267	-40.5616	0	0
HIST1H4C	46.0341	-3.3931	0.335559	-10.1118	4.89847e-24	3.90333e-23
SOSTDC1	186.413	-3.26851	0.182051	-17.9538	4.48311e-72	1.04081e-70
PTGER3	281.677	-3.24833	0.145384	-22.3432	1.40635e-110	5.27534e-109
HOXA13	14.2055	-3.17014	0.466959	-6.7889	1.12993e-11	5.24797e-11
RGPD3	75.1031	-3.10884	0.261052	-11.9089	1.06427e-32	1.11693e-31
BAHCC1	1488.8	-3.10029	0.0672165	-46.124	0	0
HIST1H1E	33.6101	-3.09793	0.368482	-8.40728	4.19615e-17	2.58758e-16
KLF2	96.1343	-3.03173	0.234933	-12.9046	4.23747e-38	5.18886e-37
FAM53B	1668.37	-2.94211	0.06149	-47.847	0	0
CREB3L3	15.408	-2.84565	0.446098	-6.37898	1.78277e-10	7.7168e-10
KANK4	19.8763	-2.83513	0.421564	-6.72527	1.75264e-11	8.05521e-11
LMO1	143.219	-2.82169	0.184552	-15.2894	8.99858e-53	1.50385e-51
FGD5	108.435	-2.80371	0.211653	-13.2467	4.71453e-40	6.05801e-39
LIMS2	916.189	-2.78795	0.0799083	-34.8894	1.07772e-266	1.14291e-264
RHOU	806.841	-2.76	0.0867724	-31.8073	5.12906e-222	4.2364e-220
ASB13	55.1019	-2.74999	0.285826	-9.62121	6.50617e-22	4.83251e-21
RP11-439L8.4	15.838	-2.74911	0.441114	-6.23221	4.59903e-10	1.9375e-09
CEBPE	324.75	-2.70583	0.127044	-21.2983	1.17689e-100	3.91841e-99
POU3F2	194.22	-2.66588	0.158216	-16.8496	1.05546e-63	2.11832e-62
RP11-973H7.4	131.922	-2.6631	0.191336	-13.9184	4.89413e-44	6.83031e-43
LOC101928004	55.1308	-2.61888	0.276455	-9.47306	2.71757e-21	1.97746e-20
NFIA	28.4087	-2.60486	0.358132	-7.27346	3.50385e-13	1.7757e-12
CABLES1	106.966	-2.59326	0.209075	-12.4035	2.50132e-35	2.83461e-34
PTCHD4	87.2228	-2.58807	0.228049	-11.3487	7.52316e-30	7.27747e-29
DAB1	23.4792	-2.57033	0.387645	-6.63061	3.34291e-11	1.51175e-10
ALDH1B1	124.268	-2.52854	0.19216	-13.1585	1.52143e-39	1.92759e-38
ZNF521	162.999	-2.52353	0.17124	-14.7368	3.74208e-49	5.83384e-48
DBP	154.011	-2.51161	0.174928	-14.358	9.49671e-47	1.4212e-45
ARHGAP29	12.2466	-2.51061	0.460277	-5.45455	4.90962e-08	1.80422e-07
TERT	699.031	-2.5078	0.0961232	-26.0894	4.81146e-150	2.61585e-148
ZFP36L2	2475.71	-2.49883	0.0499198	-50.057	0	0
RGMA	116.646	-2.49519	0.198112	-12.5948	2.25397e-36	2.63782e-35
GAS2L1	1711.63	-2.48431	0.0588038	-42.2475	0	0
LOC101929698	6.38384	-2.47583	0.505679	-4.89606	9.77772e-07	3.21495e-06
ZNF652	303.197	-2.47511	0.133521	-18.5372	1.03375e-76	2.55906e-75
ACVR2B-AS1	54.8615	-2.46481	0.27582	-8.93628	4.02487e-19	2.69475e-18
BCL11B	2049.64	-2.43765	0.0568418	-42.8848	0	0
NDST3	456.121	-2.3892	0.101098	-23.6326	1.78258e-123	7.59918e-122
LOC102724759	5.99733	-2.37693	0.506861	-4.68951	2.73866e-06	8.70494e-06
LOC440461	19.2692	-2.36469	0.401753	-5.88594	3.95804e-09	1.57478e-08
TFAP4	258.632	-2.35884	0.132409	-17.8149	5.41923e-71	1.23971e-69
RAB33A	167.311	-2.35649	0.167464	-14.0716	5.67738e-45	8.15531e-44
SEMA3G	86.0217	-2.3462	0.223389	-10.5028	8.38947e-26	7.14227e-25
FLJ33581	12.6753	-2.33027	0.448091	-5.20043	1.98831e-07	6.94997e-07
RAP1GAP2	217.465	-2.32896	0.159129	-14.6357	1.66315e-48	2.57181e-47
LRRC45	389.252	-2.32333	0.119431	-19.4533	2.73204e-84	7.43844e-83
FAM83F	143.954	-2.31941	0.173255	-13.3873	7.17682e-41	9.40486e-40
PPM1H	44.4959	-2.30559	0.297873	-7.74017	9.92809e-15	5.49322e-14
NPB	50.6554	-2.28129	0.274795	-8.30181	1.02534e-16	6.21791e-16
CXCR4	2536.85	-2.27232	0.0475213	-47.8168	0	0
SOX12	674.503	-2.25683	0.0848145	-26.609	5.33654e-156	3.03582e-154
EVPL	710.349	-2.25627	0.086003	-26.2348	1.0651e-151	5.92182e-150
KCTD11	141.175	-2.25348	0.177853	-12.6705	8.61958e-37	1.01916e-35
TENM1	50.0202	-2.25347	0.277537	-8.11953	4.67975e-16	2.75053e-15
RSAD2	105.444	-2.24685	0.201519	-11.1496	7.19612e-29	6.76309e-28
ADAMTS15	10.144	-2.24203	0.4714	-4.75611	1.97357e-06	6.35538e-06
GPR157	63.8581	-2.23798	0.250197	-8.94487	3.72374e-19	2.49411e-18
DAPK1	287.955	-2.23237	0.123349	-18.098	3.30543e-73	7.83272e-72
MYCL	44.2079	-2.2319	0.290274	-7.68894	1.48361e-14	8.13027e-14
FGFR3	160.534	-2.22956	0.174364	-12.7868	1.94239e-37	2.34342e-36
VANGL1	3934.49	-2.22093	0.043268	-51.3295	0	0
ABCG1	405.215	-2.21392	0.104938	-21.0974	8.40112e-99	2.73873e-97
BHLHE23	62.6519	-2.20899	0.254583	-8.67687	4.06792e-18	2.60869e-17
CORO2A	115.945	-2.20409	0.190719	-11.5567	6.82671e-31	6.81085e-30
RNF207	39.9258	-2.20275	0.300746	-7.32428	2.40189e-13	1.23141e-12
DAAM2	490.411	-2.20148	0.0978273	-22.5038	3.81393e-112	1.45932e-110
TMEM26	16.3132	-2.19603	0.415014	-5.29146	1.21342e-07	4.30714e-07
C11orf74	12.3387	-2.19592	0.460301	-4.77061	1.83672e-06	5.92357e-06
HES1	63.5505	-2.18504	0.251782	-8.67829	4.01779e-18	2.57751e-17
PMEPA1	3510.56	-2.17819	0.0407286	-53.4805	0	0
FAM49A	107.598	-2.15295	0.194289	-11.0812	1.5483e-28	1.43628e-27
SRGAP3	60.2192	-2.14825	0.263722	-8.14589	3.76506e-16	2.22434e-15
ACKR3	14.1424	-2.1454	0.433704	-4.94669	7.54851e-07	2.50693e-06
CMPK2	333.722	-2.14216	0.114121	-18.7709	1.30701e-78	3.33647e-77
ZFYVE21	545.473	-2.13161	0.0919962	-23.1707	9.00196e-119	3.63891e-117
AMPD3	240.763	-2.1315	0.135545	-15.7254	1.01369e-55	1.79538e-54
C9	57.4644	-2.1196	0.258379	-8.20348	2.33525e-16	1.39546e-15
SLC17A9	25.265	-2.1184	0.353845	-5.9868	2.14004e-09	8.65895e-09
THRA	259.391	-2.08859	0.127996	-16.3176	7.40057e-60	1.40024e-58
CHST12	869.461	-2.08591	0.0785494	-26.5554	2.22327e-155	1.25644e-153
LOC101927181	100.179	-2.08165	0.200401	-10.3874	2.82938e-25	2.3585e-24
ARPP21	790.44	-2.07755	0.0772226	-26.9034	2.00181e-159	1.15407e-157
MNX1-AS1	63.4124	-2.05838	0.246625	-8.34619	7.04996e-17	4.30261e-16
SVILP1	15.9184	-2.05578	0.414814	-4.95591	7.19909e-07	2.39505e-06
FAT3	8.86149	-2.05246	0.478149	-4.29251	1.76667e-05	5.18208e-05
RAB3D	403.376	-2.04548	0.103035	-19.8523	1.05217e-87	3.02787e-86
LRFN1	260.437	-2.04397	0.130164	-15.703	1.44282e-55	2.54494e-54
LINC00528	187.208	-2.03264	0.147691	-13.7628	4.2681e-43	5.85203e-42
DHRS13	388.091	-2.03212	0.107747	-18.8601	2.42667e-79	6.23173e-78
SOX11	299.458	-2.03159	0.119728	-16.9684	1.4069e-64	2.89122e-63
B3GNT1	362.273	-2.02628	0.108455	-18.6831	6.79021e-78	1.71553e-76
TTC28	270.611	-2.0253	0.143335	-14.1299	2.48589e-45	3.58888e-44
SYK	2418.72	-2.02057	0.0462995	-43.6412	0	0
CR2	84.8384	-2.00855	0.221713	-9.05923	1.31372e-19	8.93851e-19
FZD2	105.666	-2.0083	0.195397	-10.2781	8.84996e-25	7.27475e-24
SAMD13	45.7027	-1.99999	0.289	-6.92039	4.50388e-12	2.13688e-11
GPR17	681.645	-1.99876	0.0818022	-24.434	7.43782e-132	3.40751e-130
RTN4RL1	188.104	-1.99843	0.149977	-13.3249	1.65772e-40	2.15266e-39
C1orf233	263.417	-1.9931	0.125993	-15.8191	2.29572e-56	4.13422e-55
AARD	82.7944	-1.99086	0.216854	-9.18065	4.28479e-20	2.97305e-19
RAB37	450.018	-1.98759	0.0983065	-20.2183	6.75236e-91	2.04957e-89
ADCYAP1	116.837	-1.97892	0.186364	-10.6186	2.44207e-26	2.11786e-25
ENDOD1	1420.14	-1.97868	0.0575751	-34.3668	7.89512e-259	7.97871e-257
GIMAP4	803.084	-1.97759	0.0737951	-26.7983	3.37959e-158	1.94185e-156
TJP2	519.81	-1.9772	0.0909642	-21.7361	9.35892e-105	3.30157e-103
MC4R	5.80567	-1.97514	0.502622	-3.92967	8.50635e-05	0.000233151
LOC100506734	105.306	-1.9731	0.20255	-9.7413	2.00958e-22	1.51756e-21
MOCS1	953.927	-1.97144	0.0686627	-28.712	2.70461e-181	1.84385e-179
TLDC1	253.119	-1.96283	0.131885	-14.8828	4.26039e-50	6.75841e-49
LRRC20	442.046	-1.96121	0.0982899	-19.9533	1.40253e-88	4.10486e-87
SLC9A3R2	396.607	-1.95776	0.111653	-17.5343	7.83548e-69	1.72581e-67
OSBPL5	372.269	-1.95445	0.110555	-17.6785	6.14232e-70	1.37941e-68
THEM6	531.265	-1.94912	0.0887868	-21.9528	8.13604e-107	2.92421e-105
ARHGEF17	25.4965	-1.94699	0.354307	-5.49521	3.90251e-08	1.44245e-07
NKX3-1	1599.63	-1.94617	0.0542496	-35.8743	7.67665e-282	8.79232e-280
DTX1	535.986	-1.94448	0.0910651	-21.3526	3.68443e-101	1.23872e-99
SOAT2	37.5493	-1.94432	0.300922	-6.46122	1.03863e-10	4.56362e-10
LINC00494	23.8657	-1.94359	0.367932	-5.28247	1.27455e-07	4.51853e-07
LINC00051	43.744	-1.93651	0.285069	-6.79312	1.0973e-11	5.10056e-11
DAB2IP	26.0254	-1.93469	0.349737	-5.53183	3.16905e-08	1.17845e-07
DTX4	94.713	-1.93123	0.201098	-9.60343	7.73309e-22	5.72648e-21
BCL11A	591.061	-1.9247	0.0852904	-22.5665	9.25319e-113	3.55637e-111
TXNIP	617.137	-1.91952	0.0863212	-22.237	1.50824e-109	5.62071e-108
ESPNL	20.9813	-1.91748	0.376418	-5.09401	3.50577e-07	1.2005e-06
TSHR	213.159	-1.90702	0.137487	-13.8706	9.55356e-44	1.3247e-42
RP11-439L8.3	7.12228	-1.90659	0.490084	-3.89034	0.000100106	0.000272079
LOC102723328	52.2848	-1.90324	0.275755	-6.90192	5.13037e-12	2.42699e-11
LRRC10B	69.5241	-1.89538	0.230143	-8.23563	1.78608e-16	1.07252e-15
GP5	62.8745	-1.8914	0.239522	-7.89656	2.86706e-15	1.62454e-14
SLC40A1	385.625	-1.88558	0.107479	-17.5437	6.64913e-69	1.46828e-67
CCDC116	130.586	-1.8842	0.176065	-10.7018	9.98711e-27	8.74954e-26
RAG1	104.166	-1.87802	0.1917	-9.79661	1.16425e-22	8.83861e-22
LOC101927834	6.11858	-1.8768	0.498186	-3.76727	0.000165043	0.000439773
PCYT2	713.687	-1.867	0.076842	-24.2966	2.13169e-130	9.58704e-129
AFAP1L2	23.2509	-1.86368	0.359289	-5.18712	2.13571e-07	7.43947e-07
RHOBTB1	22.5604	-1.86363	0.365613	-5.09728	3.44577e-07	1.18066e-06
GAREM	26.3052	-1.85578	0.343447	-5.40341	6.53864e-08	2.37291e-07
TNRC6C	779.233	-1.85282	0.0813002	-22.7898	5.78162e-115	2.25234e-113
SASH3	2062.83	-1.85241	0.0480094	-38.5843	0	0
LINC00426	60.1998	-1.82772	0.24513	-7.45614	8.90943e-14	4.68372e-13
IFIT1	15.259	-1.82588	0.414415	-4.40593	1.05332e-05	3.15044e-05
SLC7A8	84.0663	-1.82582	0.211562	-8.6302	6.12423e-18	3.89971e-17
SLC23A1	306.463	-1.8247	0.123716	-14.7491	3.11879e-49	4.87542e-48
KLF15	4.51084	-1.82336	0.508007	-3.58923	0.000331656	0.000856304
SAC3D1	816.616	-1.82266	0.0755894	-24.1127	1.83901e-128	8.14284e-127
LOC100507520	167.454	-1.81608	0.162049	-11.207	3.76934e-29	3.56789e-28
KCNN2	58.5382	-1.80478	0.25223	-7.15531	8.34866e-13	4.12511e-12
HEMGN	17.2639	-1.79537	0.405504	-4.4275	9.53295e-06	2.86172e-05
CACNA1H	376.535	-1.79328	0.107783	-16.638	3.70071e-62	7.24126e-61
MTL5	122.799	-1.79227	0.177199	-10.1145	4.76589e-24	3.8012e-23
MIR29C	5.81648	-1.79082	0.50083	-3.5757	0.000349294	0.000899162
NOTCH3	675.977	-1.78927	0.0836034	-21.4019	1.28272e-101	4.34448e-100
DIRAS2	5.17694	-1.78638	0.506017	-3.53027	0.000415132	0.00106099
LIME1	954.76	-1.78577	0.069243	-25.7898	1.15281e-146	6.05668e-145
SERINC5	3145.36	-1.78184	0.0407031	-43.7766	0	0
TLE1	173.477	-1.77921	0.15524	-11.461	2.07032e-30	2.03131e-29
JAKMIP1	614.648	-1.77835	0.0847143	-20.9923	7.71066e-98	2.47606e-96
ADAMTS1	712.96	-1.77692	0.0811679	-21.892	3.09851e-106	1.10901e-104
FBLN5	8.11519	-1.77274	0.480447	-3.68977	0.00022446	0.00059045
NRTN	34.4447	-1.77053	0.32705	-5.41365	6.17518e-08	2.24718e-07
C16orf74	53.4839	-1.76676	0.25624	-6.89493	5.38903e-12	2.5463e-11
FAM65A	910.013	-1.76454	0.0697337	-25.304	2.88817e-141	1.42993e-139
LOC100130899	27.6531	-1.75625	0.335118	-5.2407	1.59969e-07	5.63977e-07
ADRB1	13.9343	-1.75499	0.425695	-4.12265	3.74534e-05	0.000106426
LOC101060553	7.16157	-1.75034	0.488343	-3.58424	0.000338059	0.00087218
NEURL1B	163.663	-1.74973	0.153743	-11.3809	5.20606e-30	5.05883e-29
TTC16	130.389	-1.74871	0.181392	-9.64051	5.39209e-22	4.01717e-21
ATP8A2	687.484	-1.74626	0.0773396	-22.5791	6.95767e-113	2.68011e-111
TBX1	79.5285	-1.74383	0.220047	-7.9248	2.28517e-15	1.30084e-14
NCR2	12.3105	-1.74228	0.438576	-3.97258	7.10989e-05	0.000196442
S1PR5	52.016	-1.7422	0.257362	-6.76945	1.2927e-11	5.98453e-11
CHFR	7.96308	-1.73679	0.484913	-3.58166	0.000341416	0.000879916
KCNH2	1646.62	-1.73642	0.0545284	-31.8444	1.5724e-222	1.31135e-220
TRAM2	1270.77	-1.73478	0.0611947	-28.3486	8.71541e-177	5.75888e-175
SKOR1	13.4763	-1.73299	0.441348	-3.92658	8.61635e-05	0.000235978
RGPD1	10.6483	-1.73041	0.453168	-3.81846	0.000134285	0.000360867
SPEG	168.749	-1.72929	0.156662	-11.0384	2.4956e-28	2.30507e-27
RCOR2	133.917	-1.72558	0.169738	-10.1661	2.80884e-24	2.26129e-23
ANTXRLP1	25.9889	-1.72282	0.347653	-4.95557	7.21172e-07	2.39879e-06
LOC100128568	12.14	-1.72061	0.438061	-3.92777	8.57355e-05	0.000234918
FAM13A	64.4242	-1.72028	0.235225	-7.31333	2.60607e-13	1.33291e-12
HEPACAM	3.31399	-1.72006	0.503407	-3.41683	0.000633552	0.00158342
2022-09-03	749.604	-1.71969	0.0751906	-22.871	9.02395e-116	3.56394e-114
LRIG1	286.648	-1.71851	0.117714	-14.599	2.85074e-48	4.39244e-47
MNX1	125.083	-1.7184	0.175464	-9.79349	1.20079e-22	9.10797e-22
NAV1	134.895	-1.71698	0.181232	-9.47394	2.69487e-21	1.96178e-20
RAB26	26.3387	-1.71682	0.342517	-5.01238	5.37614e-07	1.80996e-06
FAM86A	336.162	-1.71644	0.109772	-15.6364	4.11322e-55	7.20338e-54
CD34	305.212	-1.71552	0.114079	-15.0379	4.14261e-51	6.73959e-50
C1QL4	19.8481	-1.71249	0.375221	-4.56395	5.02002e-06	1.55422e-05
CCR9	4.07445	-1.709	0.507815	-3.3654	0.000764337	0.00189185
LOC102723372	8.42732	-1.70896	0.475167	-3.59655	0.000322465	0.000833702
PRRT4	500.06	-1.70474	0.0958268	-17.7898	8.48388e-71	1.93306e-69
DLEU1	346.391	-1.70341	0.10906	-15.6191	5.39773e-55	9.44327e-54
LINC01126	6.96367	-1.69212	0.493686	-3.42751	0.000609135	0.00152639
DOC2A	142.093	-1.68865	0.1664	-10.1481	3.37751e-24	2.7039e-23
C10orf25	240.627	-1.68802	0.126767	-13.3159	1.8705e-40	2.4253e-39
LDLRAP1	161.866	-1.68752	0.152912	-11.0359	2.56426e-28	2.36468e-27
EGLN3	17.7123	-1.68723	0.396783	-4.25229	2.116e-05	6.16045e-05
BMPR1B	13.9034	-1.68515	0.422287	-3.99052	6.59275e-05	0.000182889
PRR7-AS1	30.5951	-1.67603	0.321173	-5.21846	1.80412e-07	6.33322e-07
ST3GAL4-AS1	52.2777	-1.67546	0.254992	-6.57064	5.00992e-11	2.23792e-10
SLC29A4	257.72	-1.67469	0.128311	-13.0518	6.20721e-39	7.75562e-38
ANXA2R	249.663	-1.67285	0.127534	-13.1169	2.63495e-39	3.31395e-38
TMEM52	133.172	-1.67119	0.167471	-9.97898	1.88393e-23	1.47051e-22
SPINT1	298.855	-1.66521	0.121015	-13.7603	4.41533e-43	6.04907e-42
SLITRK5	6.86612	-1.65776	0.49553	-3.34542	0.00082157	0.00202331
STARD4-AS1	47.9494	-1.65682	0.293799	-5.63929	1.70751e-08	6.46858e-08
NRROS	975.646	-1.65603	0.0681267	-24.3081	1.60757e-130	7.24885e-129
XYLB	525.744	-1.655	0.0899447	-18.4002	1.30975e-75	3.20991e-74
SDC2	8.05434	-1.65322	0.478392	-3.45578	0.000548694	0.00138098
GIMAP1	380.276	-1.65126	0.101958	-16.1956	5.41901e-59	1.01304e-57
SLC9A3R1	3738.24	-1.64457	0.0402125	-40.897	0	0
MESP2	5.94912	-1.64015	0.498837	-3.28795	0.0010092	0.00245931
LOC101927070	74.5034	-1.63769	0.216565	-7.56211	3.96583e-14	2.12916e-13
ORAI2	1009.44	-1.63532	0.0650352	-25.1452	1.59372e-139	7.77844e-138
JPH1	400.082	-1.63234	0.103944	-15.704	1.41989e-55	2.50964e-54
DUSP5P1	72.9794	-1.63124	0.228679	-7.13332	9.79782e-13	4.82173e-12
CNN2	2609.3	-1.62969	0.0447198	-36.4423	9.10153e-291	1.10116e-288
NKX2-1	80.9226	-1.62883	0.210856	-7.72485	1.11985e-14	6.18022e-14
SMAD1	276.342	-1.62819	0.120573	-13.5037	1.48685e-41	1.96795e-40
ID3	1317.47	-1.62723	0.0644576	-25.245	1.28588e-140	6.31181e-139
NXN	188.44	-1.62719	0.14897	-10.9229	8.95813e-28	8.1043e-27
SPTBN1	11391	-1.62653	0.0894705	-18.1795	7.49627e-74	1.79869e-72
KISS1R	14.7572	-1.62617	0.414225	-3.92581	8.64377e-05	0.000236691
ST8SIA6	41.7507	-1.62617	0.285847	-5.68896	1.27818e-08	4.88415e-08
KCNA6	71.0372	-1.62296	0.22665	-7.16067	8.02854e-13	3.97723e-12
ICAM4	128.83	-1.62021	0.176616	-9.17364	4.57302e-20	3.1692e-19
PI16	640.086	-1.61835	0.0827686	-19.5527	3.91264e-85	1.08243e-83
CD1D	1204.98	-1.61576	0.0625144	-25.8463	2.67932e-147	1.4207e-145
TTLL11	263.309	-1.61349	0.136147	-11.8511	2.12485e-32	2.21376e-31
GPRC5B	22.0711	-1.60823	0.362664	-4.43448	9.22932e-06	2.7737e-05
ZNF280D	634.203	-1.60758	0.0851543	-18.8784	1.71586e-79	4.42619e-78
E2F2	2688.6	-1.60754	0.0428102	-37.5503	0	0
LDOC1L	1703.39	-1.60683	0.0540216	-29.7441	2.06523e-194	1.52278e-192
ERG	8.54944	-1.60682	0.473891	-3.39071	0.00069713	0.00173299
TPO	168.507	-1.6013	0.14747	-10.8585	1.81701e-27	1.63179e-26
TRPM2	652.873	-1.60086	0.0828761	-19.3163	3.9158e-83	1.0561e-81
CD8A	64.1326	-1.59859	0.243129	-6.57508	4.86281e-11	2.17504e-10
ACSS1	1253.91	-1.59051	0.0588147	-27.0427	4.65729e-161	2.74015e-159
METTL7A	6.29685	-1.58519	0.493432	-3.21258	0.0013155	0.00315646
ANKRD63	10.2371	-1.58322	0.449102	-3.52531	0.000422984	0.00108009
ESRP1	69.6716	-1.58111	0.22349	-7.07462	1.49854e-12	7.30765e-12
RASAL1	49.0476	-1.57888	0.261321	-6.04194	1.52275e-09	6.21694e-09
CDC42BPG	60.4339	-1.57634	0.250181	-6.3008	2.96105e-10	1.26137e-09
TFDP2	3451.03	-1.57583	0.0387892	-40.6256	0	0
TTYH2	254.03	-1.57559	0.125166	-12.588	2.45862e-36	2.8734e-35
LOC102724536	12.8717	-1.57481	0.424002	-3.71417	0.000203875	0.000538278
MMP15	141.071	-1.57371	0.162647	-9.6756	3.82851e-22	2.87097e-21
TRIM25	2452.91	-1.56764	0.0437543	-35.8283	4.00224e-281	4.55354e-279
LOC102724970	3.57728	-1.56572	0.506394	-3.09191	0.00198872	0.00465559
RIMS3	919.905	-1.56314	0.0682723	-22.8957	5.12699e-116	2.02953e-114
TMEM187	70.8469	-1.56286	0.224347	-6.96624	3.25525e-12	1.5578e-11
SULT1A1	209.709	-1.5606	0.136204	-11.4578	2.14945e-30	2.10774e-29
C5orf56	85.5756	-1.55622	0.203202	-7.65847	1.88164e-14	1.02624e-13
TRPM2-AS	5.45918	-1.55579	0.499887	-3.11227	0.00185653	0.00435906
PACSIN3	301.483	-1.5547	0.11322	-13.7317	6.55747e-43	8.94105e-42
SLC34A1	2.81353	-1.55466	0.498325	-3.11977	0.00180991	0.00425483
KANK2	501.855	-1.55365	0.0917957	-16.9251	2.93925e-64	5.97589e-63
TMIE	150.438	-1.55319	0.155586	-9.98286	1.81165e-23	1.41538e-22
RAB3IL1	94.1323	-1.55273	0.197228	-7.87279	3.46824e-15	1.95937e-14
FAM198A	41.678	-1.55103	0.277645	-5.58637	2.31861e-08	8.70494e-08
VPS26B	3035.31	-1.55037	0.0395402	-39.21	0	0
PRR12	984.883	-1.55023	0.0654688	-23.6789	5.9556e-124	2.55155e-122
CERCAM	174.586	-1.54997	0.145496	-10.6531	1.68743e-26	1.4686e-25
SMIM3	521.814	-1.54637	0.0869255	-17.7896	8.51037e-71	1.93653e-69
RORB	178.236	-1.54068	0.146364	-10.5263	6.53293e-26	5.58387e-25
LINC01120	34.0786	-1.54011	0.304064	-5.06509	4.08213e-07	1.38626e-06
SLC2A1	1198.85	-1.53825	0.0595263	-25.8415	3.03263e-147	1.6031e-145
LOC149351	28.9571	-1.53584	0.331967	-4.62647	3.71954e-06	1.16566e-05
FHDC1	39.2735	-1.53381	0.297943	-5.148	2.63274e-07	9.10252e-07
CYP26A1	56.4092	-1.53317	0.250633	-6.11718	9.52449e-10	3.94957e-09
LOC257358	66.3857	-1.53113	0.226761	-6.75215	1.4567e-11	6.72022e-11
PITX1	188.097	-1.53004	0.141858	-10.7857	4.02108e-27	3.57568e-26
GJA3	452.42	-1.52738	0.0970524	-15.7377	8.34221e-56	1.47904e-54
MXD3	306.869	-1.52626	0.112096	-13.6156	3.23388e-42	4.35067e-41
LINC00563	15.6605	-1.52139	0.39833	-3.81941	0.000133771	0.000359598
ZMYM3	822.258	-1.51753	0.0709064	-21.4018	1.28463e-101	4.34448e-100
GRK6	3063.28	-1.51583	0.0408794	-37.0805	5.78735e-301	7.36494e-299
RCN3	173.308	-1.51475	0.14777	-10.2508	1.17391e-24	9.59457e-24
CREB3L1	32.59	-1.51235	0.309808	-4.88157	1.05245e-06	3.45192e-06
PARP10	676.687	-1.51234	0.0780196	-19.3841	1.05048e-83	2.83763e-82
ATP2B3	290.265	-1.50368	0.115555	-13.0126	1.03767e-38	1.28716e-37
SREBF1	2446.76	-1.50306	0.0445965	-33.7035	5.1327e-249	4.89888e-247
LRP2	103.063	-1.50289	0.188821	-7.95934	1.72959e-15	9.91467e-15
GPR162	36.0881	-1.50222	0.296752	-5.06219	4.14458e-07	1.40636e-06
SCN9A	30.8124	-1.50027	0.32143	-4.66748	3.04914e-06	9.64186e-06
KHK	258.887	-1.49971	0.123335	-12.1596	5.09994e-34	5.56299e-33
HOXD-AS1	9.30198	-1.4962	0.464656	-3.22002	0.0012818	0.0030812
GCSAM	25.0992	-1.49412	0.349671	-4.27292	1.92928e-05	5.64171e-05
CDCA7	3168.03	-1.49367	0.0404084	-36.9644	4.27474e-299	5.28346e-297
TSC22D3	8.57371	-1.49249	0.471175	-3.16759	0.00153706	0.00365035
TET1	312.55	-1.49243	0.118113	-12.6356	1.34399e-36	1.58041e-35
DFFB	311.125	-1.48988	0.112133	-13.2867	2.76564e-40	3.57246e-39
CNNM1	204.772	-1.48778	0.138553	-10.738	6.74788e-27	5.95422e-26
MYO18A	1972.45	-1.48766	0.052612	-28.276	6.81741e-176	4.48748e-174
KIF5A	184.489	-1.48681	0.143677	-10.3483	4.25863e-25	3.53617e-24
GPA33	88.8106	-1.48566	0.198439	-7.48671	7.06209e-14	3.74119e-13
GLCCI1	266.248	-1.48322	0.119207	-12.4424	1.53757e-35	1.75635e-34
RASGRP2	959.455	-1.48185	0.0733194	-20.2109	7.85574e-91	2.37609e-89
FAM90A1	50.2271	-1.48014	0.255806	-5.78616	7.20146e-09	2.81632e-08
ZNF480	878.664	-1.47905	0.0684204	-21.617	1.24203e-103	4.34584e-102
PDE3B	1717.29	-1.47656	0.0513386	-28.7612	6.56652e-182	4.53063e-180
RP11-680F20.6	2.65994	-1.47442	0.494731	-2.98024	0.00288026	0.00658543
NUDT11	281.042	-1.47338	0.122823	-11.9959	3.73119e-33	3.96425e-32
LPHN3	27.5996	-1.4724	0.332022	-4.43463	9.2229e-06	2.77275e-05
SBK1	541.453	-1.47148	0.0871726	-16.8801	6.30158e-64	1.27216e-62
TMEM169	44.4161	-1.47132	0.272043	-5.40841	6.35879e-08	2.3096e-07
PTPRN2	122.349	-1.46934	0.172149	-8.53533	1.39753e-17	8.81083e-17
FAM78B	52.7942	-1.46585	0.257237	-5.69844	1.20906e-08	4.63758e-08
ANKRD22	37.2092	-1.46566	0.296601	-4.94153	7.75116e-07	2.57125e-06
SYT3	19.5239	-1.46205	0.371219	-3.93852	8.19858e-05	0.00022511
TRIM65	770.844	-1.46012	0.072722	-20.0781	1.1459e-89	3.42376e-88
C2orf15	31.0903	-1.45714	0.31877	-4.57114	4.85073e-06	1.50425e-05
OR2W3	5.74801	-1.45679	0.4986	-2.92176	0.00348057	0.00785655
PIGZ	100.584	-1.45642	0.188277	-7.73549	1.03002e-14	5.69176e-14
FRMPD1	13.2243	-1.45398	0.41943	-3.46657	0.000527137	0.00133004
RTN4R	99.1739	-1.45244	0.193496	-7.50631	6.08182e-14	3.23686e-13
RP11-445H22.3	348.35	-1.45178	0.107826	-13.4641	2.54481e-41	3.34505e-40
RP11-61I13.3	105.226	-1.44943	0.183229	-7.91049	2.56372e-15	1.4565e-14
MUM1	902.368	-1.44601	0.0694156	-20.8311	2.25971e-96	7.16271e-95
RGS14	692.493	-1.4444	0.0782698	-18.4542	4.82677e-76	1.19144e-74
LRMP	222.743	-1.44313	0.128245	-11.2529	2.24028e-29	2.13823e-28
SLIT1	2145.71	-1.44186	0.0495778	-29.0829	5.90785e-186	4.14273e-184
IL22RA1	70.1276	-1.44176	0.223336	-6.45556	1.07818e-10	4.73131e-10
CERKL	298.439	-1.44108	0.114484	-12.5876	2.47072e-36	2.88558e-35
TCHH	41.0932	-1.44046	0.276442	-5.21072	1.88113e-07	6.58608e-07
ABCB10	3358.91	-1.43971	0.0406056	-35.4559	2.35241e-275	2.60738e-273
FBXL16	124.222	-1.43898	0.173136	-8.31127	9.4686e-17	5.74808e-16
VWDE	107.123	-1.43694	0.182301	-7.88221	3.21645e-15	1.82071e-14
TSPAN14	693.615	-1.43516	0.0752211	-19.0792	3.76012e-81	9.87751e-80
CTIF	141.258	-1.42708	0.158866	-8.98292	2.6368e-19	1.77162e-18
TRIM2	76.3156	-1.42535	0.2108	-6.76164	1.36435e-11	6.30773e-11
CCDC112	241.738	-1.42463	0.134295	-10.6082	2.72832e-26	2.36252e-25
LRRC63	16.6097	-1.42045	0.39379	-3.60712	0.00030962	0.0008017
SLC25A29	1010.66	-1.4201	0.0666781	-21.2978	1.18922e-100	3.95181e-99
SPSB4	185.052	-1.41896	0.139789	-10.1508	3.28763e-24	2.6344e-23
MURC	23.9757	-1.41883	0.344241	-4.12163	3.76203e-05	0.000106847
ATP2A3	11882.8	-1.41808	0.0303509	-46.7229	0	0
LOC101928163	5.0097	-1.41769	0.504207	-2.81172	0.00492769	0.0108773
SMPD5	14.7289	-1.41691	0.405599	-3.49337	0.000476959	0.00121054
PLCL1	36.8221	-1.41529	0.291013	-4.86331	1.15437e-06	3.77465e-06
LGR6	3.12542	-1.41296	0.503764	-2.80481	0.00503455	0.0110903
HIRA	2830.54	-1.4128	0.0410637	-34.405	2.12158e-259	2.15673e-257
SCLY	56.7283	-1.40668	0.239154	-5.88191	4.05566e-09	1.6125e-08
TMCC1-AS1	31.112	-1.40391	0.30899	-4.54355	5.53149e-06	1.70429e-05
FAM78A	920.946	-1.40044	0.0725357	-19.3069	4.69743e-83	1.26492e-81
MYO7B	16493.7	-1.39744	0.0273763	-51.0455	0	0
ZNF395	721.383	-1.39557	0.075036	-18.5986	3.29693e-77	8.2688e-76
BIN1	413.489	-1.39532	0.0981517	-14.216	7.29534e-46	1.0694e-44
FGF9	222.369	-1.395	0.127786	-10.9167	9.59623e-28	8.66789e-27
MVB12B	733.102	-1.39404	0.0744009	-18.7368	2.47993e-78	6.29324e-77
LINC00861	46.9105	-1.39172	0.264329	-5.2651	1.40115e-07	4.95405e-07
FGF14	6.74353	-1.39115	0.49069	-2.83509	0.00458129	0.0101596
EPHA3	1389.74	-1.39032	0.0584091	-23.8031	3.09973e-125	1.3414e-123
CD244	73.4574	-1.38664	0.219262	-6.32411	2.5469e-10	1.09035e-09
ATP2C2	9.17466	-1.38565	0.465697	-2.97543	0.00292575	0.00668409
MIR3186	6.7493	-1.38528	0.488374	-2.83651	0.00456093	0.0101167
GIMAP7	802.278	-1.3834	0.0705552	-19.6074	1.33805e-85	3.75002e-84
SLC46A1	12.0762	-1.38255	0.430418	-3.21212	0.00131762	0.0031611
KIAA1024	260.858	-1.3792	0.118694	-11.6197	3.27094e-31	3.29588e-30
APOL3	142.95	-1.37654	0.163599	-8.4141	3.95917e-17	2.44759e-16
LOC102724450	6.56213	-1.37478	0.487642	-2.81925	0.00481365	0.0106406
UBL4A	994.232	-1.37395	0.0645828	-21.2742	1.96673e-100	6.52286e-99
FLJ20464	77.8557	-1.37208	0.213728	-6.41977	1.3648e-10	5.95257e-10
LOC101928274	11.0432	-1.37174	0.450244	-3.04667	0.00231395	0.00537067
LEPREL4	46.0284	-1.36971	0.268229	-5.10649	3.28191e-07	1.12676e-06
MLLT3	391.671	-1.36968	0.106446	-12.8673	6.87348e-38	8.35122e-37
LOC102724155	3.6949	-1.36773	0.507224	-2.6965	0.00700724	0.0150896
NREP	389.486	-1.36493	0.0973084	-14.0268	1.06851e-44	1.52594e-43
CHRNA9	63.2302	-1.36389	0.232296	-5.87134	4.32279e-09	1.71554e-08
ACOT11	43.7946	-1.36363	0.273908	-4.97841	6.41083e-07	2.14151e-06
FOXN3	1610.28	-1.36236	0.0548355	-24.8445	2.96476e-136	1.40703e-134
THEMIS2	80.8831	-1.3617	0.20807	-6.54441	5.97311e-11	2.66057e-10
PRRG2	13.0169	-1.35841	0.421771	-3.22072	0.00127868	0.00307457
CASC14	42.1553	-1.35561	0.27229	-4.97857	6.40558e-07	2.14059e-06
PCYOX1	774.733	-1.35507	0.0735252	-18.43	7.55245e-76	1.85624e-74
CBX2	825.242	-1.35089	0.0727622	-18.5658	6.08028e-77	1.50953e-75
B4GALNT4	127.979	-1.34761	0.180369	-7.47138	7.93566e-14	4.19104e-13
TRERF1	334.138	-1.34684	0.111776	-12.0494	1.9526e-33	2.09792e-32
INPP4A	1766.92	-1.34328	0.0493841	-27.2007	6.37433e-163	3.81571e-161
LOC440570	10.1657	-1.34326	0.455281	-2.9504	0.00317361	0.00720689
CTDSPL	675.453	-1.34302	0.0771313	-17.4121	6.68193e-68	1.4568e-66
C16orf89	18.3253	-1.34294	0.376922	-3.56291	0.000366769	0.000942713
ASCL4	2.4331	-1.34087	0.486973	-2.75348	0.00589645	0.0128457
IGFBP5	24.1145	-1.34082	0.387533	-3.45988	0.00054041	0.0013615
ARHGEF4	2.29985	-1.33898	0.487533	-2.74643	0.00602475	0.0130936
ITGA4	10489.4	-1.33648	0.0336182	-39.7545	0	0
NUDT6	45.8338	-1.33442	0.262516	-5.08321	3.71105e-07	1.266e-06
F2R	74.8873	-1.33005	0.210938	-6.30542	2.87414e-10	1.22586e-09
FAM45A	235.761	-1.32987	0.123495	-10.7686	4.84455e-27	4.29682e-26
C20orf197	260.224	-1.32825	0.124313	-10.6847	1.20091e-26	1.04996e-25
YPEL1	352.543	-1.32675	0.103017	-12.8789	5.91424e-38	7.19594e-37
KCNC1	2.78286	-1.32606	0.501527	-2.64405	0.00819196	0.0174353
LOC101926937	8.28367	-1.32552	0.475087	-2.79005	0.00527	0.0115704
KIAA0226L	603.164	-1.32531	0.0799041	-16.5862	8.76269e-62	1.70684e-60
HHIP-AS1	715.337	-1.32475	0.0749647	-17.6717	6.9265e-70	1.55146e-68
KLLN	133.988	-1.32449	0.163969	-8.0777	6.60014e-16	3.84766e-15
KANK1	38.101	-1.32386	0.286437	-4.62182	3.80395e-06	1.19081e-05
RPRML	4.62486	-1.32344	0.505586	-2.61764	0.00885403	0.018733
NEIL3	876.34	-1.32335	0.0705214	-18.7652	1.45344e-78	3.70476e-77
FLJ45139	2.8214	-1.32194	0.501876	-2.634	0.00843861	0.017927
LOC101926907	6.52019	-1.32103	0.494396	-2.67201	0.00753994	0.0161537
RASGRP3	14.0547	-1.31878	0.421599	-3.12805	0.00175973	0.00414479
SLC2A4RG	492.427	-1.31858	0.0884857	-14.9016	3.21579e-50	5.11076e-49
ACSF3	1788.77	-1.31805	0.0494579	-26.65	1.79054e-156	1.02198e-154
STK32C	72.6339	-1.31434	0.224044	-5.86645	4.45232e-09	1.76531e-08
TTLL12	3277.45	-1.31238	0.0391355	-33.5342	1.52908e-246	1.4355e-244
BCAR3	24.3926	-1.31142	0.351671	-3.7291	0.000192162	0.000508839
KLHL31	6.30174	-1.31136	0.489973	-2.6764	0.00744185	0.0159614
BACE2	1541.47	-1.30914	0.0533307	-24.5476	4.58552e-133	2.11204e-131
DCLK3	10.015	-1.3083	0.455405	-2.87283	0.00406811	0.00909792
BTN3A3	145.974	-1.30705	0.155159	-8.42394	3.6402e-17	2.25608e-16
DENND3	614.15	-1.30583	0.0796052	-16.4038	1.79561e-60	3.43909e-59
DQX1	63.1505	-1.30479	0.22871	-5.70502	1.16327e-08	4.46791e-08
HSBP1L1	77.8969	-1.30274	0.206884	-6.29695	3.03569e-10	1.29188e-09
TSKU	98.2496	-1.30204	0.189122	-6.88462	5.79419e-12	2.73323e-11
HES6	210.397	-1.30104	0.132781	-9.79842	1.14364e-22	8.68981e-22
RGS9BP	7.47153	-1.3005	0.477867	-2.72147	0.00649932	0.0140451
FLJ31945	32.4122	-1.29831	0.306037	-4.24232	2.2122e-05	6.42529e-05
CHRNA3	952.742	-1.29789	0.0673521	-19.2703	9.54384e-83	2.56192e-81
CCDC85C	1118.4	-1.29786	0.0623121	-20.8284	2.39166e-96	7.55308e-95
PDGFC	140.646	-1.2978	0.159079	-8.15822	3.40003e-16	2.01631e-15
PIANP	134.211	-1.29687	0.160912	-8.05953	7.65854e-16	4.44957e-15
SMKR1	124.432	-1.2966	0.170771	-7.59264	3.13448e-14	1.69075e-13
LAIR1	4.04668	-1.29513	0.508014	-2.54941	0.0107906	0.0225308
SDCCAG3	1236.93	-1.29256	0.0575822	-22.4473	1.36095e-111	5.15002e-110
TBC1D8	457.974	-1.28957	0.0907049	-14.2172	7.167e-46	1.05149e-44
THAP8	108.877	-1.28908	0.182148	-7.07712	1.47177e-12	7.18327e-12
NT5M	280.52	-1.28795	0.122057	-10.5521	4.96821e-26	4.2613e-25
IRS1	569.263	-1.28725	0.0855884	-15.04	4.01466e-51	6.53762e-50
HHIP	1124.48	-1.2863	0.0630961	-20.3863	2.21069e-92	6.79422e-91
FAM86C2P	108.978	-1.28597	0.17709	-7.26167	3.82353e-13	1.932e-12
AP001258.4	36.2147	-1.28595	0.294331	-4.36905	1.24788e-05	3.71294e-05
PHF7	360.293	-1.28538	0.105548	-12.1782	4.06185e-34	4.43627e-33
FAM129B	354.205	-1.28495	0.104919	-12.2471	1.74049e-34	1.92169e-33
CCNJL	135.017	-1.28461	0.168965	-7.6028	2.89783e-14	1.56556e-13
DDN	102.382	-1.28149	0.183961	-6.96608	3.25891e-12	1.55912e-11
TRAF3IP3	1336.57	-1.28091	0.05601	-22.8694	9.37698e-116	3.69487e-114
C19orf68	247.527	-1.27868	0.123558	-10.3488	4.23665e-25	3.51962e-24
HEY2	125.316	-1.27788	0.168448	-7.58617	3.29493e-14	1.77507e-13
TEAD4	400.308	-1.27751	0.0969257	-13.1803	1.13971e-39	1.44718e-38
SNHG11	142.451	-1.27734	0.16711	-7.64373	2.1102e-14	1.14907e-13
TRIM14	1839.51	-1.27605	0.0488651	-26.1136	2.55243e-150	1.39209e-148
CYB5RL	228.844	-1.27563	0.128358	-9.93813	2.84114e-23	2.20265e-22
ASB9	20.9325	-1.27549	0.357292	-3.56987	0.000357153	0.000918545
IMPDH1	1594.12	-1.27375	0.0539666	-23.6026	3.62239e-123	1.53282e-121
HOXA7	112.973	-1.27306	0.180533	-7.05165	1.76805e-12	8.59753e-12
AKR7L	12.3846	-1.27099	0.423412	-3.00177	0.00268412	0.0061698
GLRX	1101.01	-1.27042	0.0606998	-20.9296	2.88102e-97	9.19998e-96
CBX3P2	19.1843	-1.27023	0.365921	-3.47132	0.000517898	0.00130788
KLF11	136.824	-1.2682	0.163066	-7.77721	7.41399e-15	4.1301e-14
CEMP1	69.1947	-1.26359	0.231305	-5.46289	4.68432e-08	1.72437e-07
FAM45B	49.921	-1.26324	0.254889	-4.95604	7.19438e-07	2.39395e-06
KCTD12	1747.25	-1.26293	0.0609348	-20.7259	2.02484e-95	6.31337e-94
HOXB13	32.1334	-1.26176	0.315283	-4.00199	6.28132e-05	0.000174617
LOC100505771	43.9399	-1.26086	0.277151	-4.54937	5.38079e-06	1.66053e-05
C3orf18	115.107	-1.26075	0.176416	-7.14646	8.90469e-13	4.39731e-12
SSR4P1	29.9298	-1.26046	0.320347	-3.93468	8.33086e-05	0.000228633
LOC728743	262.928	-1.25861	0.121172	-10.387	2.84217e-25	2.36801e-24
GCK	10.0034	-1.25491	0.449437	-2.79218	0.00523538	0.0114988
LOC102723730	9.11066	-1.25414	0.463049	-2.70845	0.00675986	0.0145842
SHANK1	304.217	-1.25403	0.114965	-10.9079	1.05613e-27	9.53461e-27
RITA1	500.571	-1.25378	0.0897693	-13.9666	2.49091e-44	3.50769e-43
C1QL1	250.338	-1.24871	0.120026	-10.4037	2.38563e-25	1.99344e-24
TLN2	306.935	-1.24836	0.117364	-10.6367	2.01201e-26	1.74842e-25
FAM117B	457.139	-1.24694	0.0937091	-13.3065	2.12244e-40	2.74988e-39
ISPD	21.5083	-1.24621	0.36186	-3.44391	0.000573374	0.00144098
SIX1	42.0475	-1.24449	0.274427	-4.53488	5.76372e-06	1.77012e-05
MTRNR2L8	5.54261	-1.24363	0.501292	-2.48084	0.0131072	0.0269162
TRIM47	782.979	-1.24358	0.0720687	-17.2555	1.01674e-66	2.16989e-65
FAM53A	16.7389	-1.24341	0.390653	-3.18289	0.00145813	0.00347589
MZB1	1250.45	-1.24145	0.0678711	-18.2913	9.70405e-75	2.35474e-73
FAM46C	1525.04	-1.24116	0.0550963	-22.5271	2.25247e-112	8.63784e-111
ZNF496	1528.33	-1.24108	0.0541127	-22.9351	2.07672e-116	8.27797e-115
FTO-IT1	15.1791	-1.24063	0.403246	-3.0766	0.00209378	0.00488208
GKAP1	171.826	-1.24012	0.152515	-8.13119	4.25102e-16	2.50369e-15
PAK6	48.3493	-1.23837	0.259633	-4.76968	1.84515e-06	5.94963e-06
LOC102723345	7.07607	-1.2382	0.479299	-2.58336	0.00978433	0.0205646
ZNF837	93.075	-1.23802	0.204299	-6.05983	1.36262e-09	5.58176e-09
FAM124A	130.196	-1.23772	0.165566	-7.47568	7.68033e-14	4.05994e-13
ELOVL6	211.49	-1.2376	0.131949	-9.37942	6.63346e-21	4.74648e-20
LOC102724330	16.7805	-1.23727	0.387416	-3.19364	0.00140491	0.00335694
NSG1	282.555	-1.23707	0.112824	-10.9646	5.65501e-28	5.15674e-27
IMPA2	557.205	-1.23642	0.0823491	-15.0144	5.91085e-51	9.59814e-50
WNT2B	13.9745	-1.23546	0.412255	-2.99684	0.00272795	0.00626218
ZNF618	11.5536	-1.23507	0.43034	-2.86999	0.00410486	0.00917175
MRPS26	529.286	-1.23493	0.0896512	-13.7748	3.61297e-43	4.95773e-42
CBFA2T3	359.356	-1.23466	0.103864	-11.8873	1.37823e-32	1.44378e-31
ASIC1	482.108	-1.23424	0.100928	-12.2289	2.17953e-34	2.40182e-33
OAS1	83.7775	-1.23332	0.200611	-6.14784	7.85434e-10	3.26963e-09
LOC100134368	9.89335	-1.23033	0.448052	-2.74595	0.0060336	0.0131095
SHQ1	2928.51	-1.23005	0.0417475	-29.4641	8.31791e-191	6.00427e-189
SLC35E3	128.28	-1.22978	0.16818	-7.31227	2.62661e-13	1.34261e-12
LOC102723683	6.4458	-1.22871	0.485227	-2.53223	0.011334	0.0235764
GALNT14	30.4827	-1.22851	0.309216	-3.973	7.0972e-05	0.000196123
PITPNM2	2353.61	-1.22826	0.045518	-26.984	2.27964e-160	1.32311e-158
KCNA3	544.812	-1.22782	0.0893153	-13.7471	5.30418e-43	7.25524e-42
TMPO-AS1	196.998	-1.22661	0.137459	-8.92346	4.51957e-19	3.02008e-18
SOGA2	314.363	-1.22614	0.110421	-11.1042	1.19645e-28	1.11409e-27
DHRS4L1	13.8069	-1.22403	0.410338	-2.98299	0.00285448	0.00652823
AMER1	309.789	-1.22315	0.112719	-10.8513	1.96511e-27	1.76203e-26
MCM3AP-AS1	73.107	-1.22217	0.211979	-5.76551	8.14099e-09	3.16932e-08
TUB	728.106	-1.22071	0.0769298	-15.8679	1.05775e-56	1.91689e-55
C4orf50	4.96331	-1.2207	0.50474	-2.41848	0.0155857	0.0314977
FBRSL1	1376.43	-1.21879	0.0650345	-18.7406	2.30928e-78	5.86886e-77
CDCA7L	2173.09	-1.21415	0.0449012	-27.0406	4.92964e-161	2.89048e-159
RASD2	50.7117	-1.21375	0.250032	-4.85437	1.20768e-06	3.94371e-06
SPTBN2	941.588	-1.21191	0.0743896	-16.2914	1.13546e-59	2.14364e-58
ZHX3	767.953	-1.21175	0.070545	-17.177	3.9496e-66	8.32566e-65
AGAP1	302.459	-1.20986	0.113831	-10.6286	2.19435e-26	1.90399e-25
ERP27	101.967	-1.20971	0.182117	-6.6425	3.08409e-11	1.39912e-10
THY1	250.162	-1.2095	0.121732	-9.93578	2.90882e-23	2.25309e-22
REEP1	14.114	-1.20912	0.412151	-2.93368	0.00334967	0.00757699
LINC00539	79.28	-1.20842	0.207037	-5.83672	5.32395e-09	2.09735e-08
GLI1	86.867	-1.20794	0.196261	-6.15473	7.52062e-10	3.1345e-09
ZNF367	752.805	-1.20762	0.0755986	-15.9742	1.93469e-57	3.55867e-56
ACAD8	725.388	-1.20697	0.0740473	-16.3	9.8648e-60	1.86444e-58
TRIM7	234.45	-1.20697	0.128841	-9.36789	7.39944e-21	5.28575e-20
SCO2	37.7809	-1.206	0.288129	-4.18562	2.84395e-05	8.17314e-05
RARRES2	21.8663	-1.2057	0.354776	-3.39848	0.000677606	0.00168861
RP11-18H21.1	81.8998	-1.20544	0.201387	-5.98572	2.1544e-09	8.715e-09
PAQR4	550.829	-1.20512	0.0848047	-14.2105	7.88048e-46	1.15419e-44
TMEM121	42.4944	-1.20446	0.275553	-4.37108	1.23632e-05	3.67983e-05
APBA1	21.4223	-1.20339	0.359606	-3.34642	0.000818625	0.00201721
FA2H	5.89757	-1.20161	0.495355	-2.42576	0.0152765	0.030931
APH1B	263.405	-1.20126	0.121189	-9.91226	3.68212e-23	2.84565e-22
BTBD2	1746.55	-1.20052	0.0526802	-22.7888	5.92757e-115	2.30397e-113
THBS4	3.6813	-1.19966	0.50801	-2.36148	0.0182021	0.0363607
PHRF1	27.8241	-1.19908	0.328153	-3.65403	0.000258161	0.000674452
RNF144B	221.716	-1.19859	0.12726	-9.41841	4.57969e-21	3.30585e-20
STOX2	159.762	-1.19784	0.148598	-8.06093	7.57186e-16	4.40368e-15
CDC42BPB	79.7482	-1.19627	0.205361	-5.82522	5.70372e-09	2.24285e-08
C14orf93	127.9	-1.19576	0.177146	-6.75017	1.47676e-11	6.81095e-11
UBTF	4612.26	-1.19492	0.0331641	-36.0306	2.77732e-284	3.29064e-282
MDFI	433.91	-1.19355	0.0960787	-12.4226	1.96932e-35	2.24207e-34
ATG9B	169.129	-1.18988	0.14878	-7.99755	1.26915e-15	7.31435e-15
HSPA12B	19.9834	-1.18878	0.363942	-3.26641	0.0010892	0.00264449
USP41	5.7589	-1.18792	0.495812	-2.3959	0.0165795	0.0333532
IGLL1	95.1554	-1.18784	0.196273	-6.05199	1.43065e-09	5.84927e-09
CDR2L	456.076	-1.18624	0.0910121	-13.0339	7.85009e-39	9.75865e-38
LOC101929440	2.96964	-1.1861	0.505367	-2.34701	0.0189249	0.0376875
SIX6	1086.81	-1.18583	0.0619013	-19.1569	8.48419e-82	2.25284e-80
ACAP1	2424.09	-1.18577	0.0432798	-27.3978	2.91653e-165	1.7768e-163
NR1D2	229.191	-1.18487	0.125339	-9.45336	3.28112e-21	2.37947e-20
TMEM132E	10.0876	-1.18466	0.443242	-2.67272	0.00752395	0.0161214
HIST1H3J	6.35785	-1.18271	0.493175	-2.39816	0.0164778	0.0331524
FAM212A	29.8315	-1.1816	0.309648	-3.81594	0.000135667	0.000364467
RNPEPL1	1145.47	-1.18148	0.0591678	-19.9682	1.04066e-88	3.06665e-87
LRIG3	282.763	-1.18078	0.11266	-10.4809	1.05771e-25	8.96913e-25
ZBED3	250.33	-1.18051	0.125795	-9.38438	6.32894e-21	4.53424e-20
SBSPON	8.1437	-1.18041	0.472317	-2.4992	0.0124475	0.0256998
CCDC85B	657.588	-1.17998	0.0794331	-14.855	6.45954e-50	1.02093e-48
ANKRD62P1-PARP4P3	8.55074	-1.17935	0.47067	-2.50569	0.0122214	0.0252633
KLRG1	20.9226	-1.17916	0.361145	-3.26507	0.00109436	0.00265553
TCF12	5050.92	-1.17717	0.0377769	-31.1612	3.57762e-213	2.78115e-211
C3orf35	10.1492	-1.17669	0.467678	-2.51602	0.0118689	0.0245886
RIPK4	330.161	-1.17592	0.116886	-10.0604	8.26719e-24	6.53313e-23
APLN	3.66118	-1.17582	0.507797	-2.31554	0.0205836	0.0406934
LOC101928714	14.4045	-1.17538	0.404876	-2.90307	0.00369524	0.00830836
TRIB2	245.073	-1.17517	0.123881	-9.48628	2.39431e-21	1.74742e-20
RPS6KA2	80.1532	-1.17512	0.205542	-5.71715	1.08328e-08	4.16906e-08
LPCAT4	263.619	-1.17494	0.116859	-10.0544	8.78968e-24	6.93646e-23
DNAH11	57.6194	-1.1748	0.251876	-4.66418	3.09843e-06	9.78871e-06
CSPG5	13.54	-1.17423	0.422128	-2.78169	0.00540771	0.0118516
IRX5	147.102	-1.17387	0.153164	-7.66414	1.80038e-14	9.8317e-14
RPUSD1	771.524	-1.1732	0.0701069	-16.7345	7.34586e-63	1.44727e-61
KIAA1549	711.135	-1.17152	0.0738146	-15.8711	1.00424e-56	1.82184e-55
TUBB-7	8.92131	-1.17139	0.456329	-2.56699	0.0102586	0.0215008
NARFL	951.716	-1.17119	0.0691179	-16.9448	2.10351e-64	4.29197e-63
RP11-539L10.2	4.65252	-1.1708	0.50502	-2.31832	0.0204317	0.0404118
ENHO	60.5062	-1.1698	0.232147	-5.03904	4.67876e-07	1.582e-06
SULT2B1	11.7513	-1.16718	0.434589	-2.68571	0.00723751	0.0155445
RNF125	166.46	-1.16605	0.147099	-7.92697	2.24551e-15	1.27911e-14
RP11-611D20.2	21.6706	-1.16528	0.358699	-3.24863	0.00115962	0.00280595
SLC1A4	1537.28	-1.1644	0.0518494	-22.4573	1.08512e-111	4.1244e-110
ZNF8	18.4175	-1.16347	0.381637	-3.04864	0.00229882	0.005337
ADRB2	12.1534	-1.16249	0.427265	-2.72078	0.0065129	0.0140726
SLC2A6	228.487	-1.16235	0.126479	-9.19005	3.92647e-20	2.72773e-19
FAM179A	19.275	-1.16213	0.367674	-3.16075	0.00157362	0.00373099
RP11-586D19.1	11.8188	-1.16037	0.43734	-2.65325	0.00797217	0.0169851
ADAM33	7.78588	-1.15996	0.46991	-2.46847	0.0135694	0.027789
DPEP2	30.0034	-1.15976	0.319614	-3.62863	0.000284933	0.000741352
PIDD	859.085	-1.15959	0.0788529	-14.7057	5.92772e-49	9.19947e-48
GNB1L	236.862	-1.15904	0.123337	-9.39732	5.59698e-21	4.02159e-20
NPAS4	20.414	-1.15779	0.365387	-3.16868	0.00153133	0.00363776
SCD	7938.3	-1.15683	0.029317	-39.4595	0	0
WT1	175.73	-1.15548	0.150608	-7.67214	1.69146e-14	9.24865e-14
B3GNT3	2.98162	-1.1541	0.504331	-2.28837	0.0221159	0.0434926
P2RX5	156.192	-1.15315	0.158905	-7.25685	3.96206e-13	2.00006e-12
TOLLIP-AS1	8.4643	-1.15303	0.468444	-2.4614	0.0138394	0.028278
AFF2	854.76	-1.15295	0.0727792	-15.8418	1.60254e-56	2.89199e-55
FLJ35934	3.4721	-1.15186	0.507763	-2.2685	0.0232987	0.0456306
UNG	1540.24	-1.15145	0.0541927	-21.2473	3.48998e-100	1.15304e-98
GPR124	352.756	-1.15005	0.107774	-10.671	1.39169e-26	1.21428e-25
BLNK	5.15564	-1.14833	0.502083	-2.28714	0.0221878	0.0436189
LHFPL2	18.4714	-1.14682	0.373921	-3.06701	0.00216209	0.00503248
TSPAN2	229.548	-1.14639	0.123773	-9.26207	2.00502e-20	1.40942e-19
ZNF362	571.422	-1.14516	0.0811012	-14.1201	2.85477e-45	4.11797e-44
PAQR7	94.7215	-1.14344	0.187977	-6.08288	1.18042e-09	4.86088e-09
ADAD2	23.417	-1.14253	0.354578	-3.22221	0.00127204	0.00305944
RTKN	99.379	-1.14244	0.185302	-6.16527	7.03644e-10	2.93912e-09
FAM160A1	6.24337	-1.1423	0.491551	-2.32387	0.0201322	0.0398929
CYP2U1	173.958	-1.14182	0.141454	-8.072	6.91575e-16	4.02618e-15
RNF187	3013.59	-1.14125	0.0396843	-28.7583	7.12781e-182	4.89823e-180
LINC00663	6.15602	-1.14084	0.490108	-2.32773	0.0199264	0.0395215
C11orf45	58.5077	-1.14006	0.241347	-4.72376	2.31523e-06	7.40839e-06
SNTB1	115.327	-1.13987	0.179977	-6.33341	2.39797e-10	1.02736e-09
LOC257396	55.1344	-1.13915	0.24707	-4.61062	4.01479e-06	1.25362e-05
PDE11A	15.8021	-1.13911	0.400473	-2.8444	0.00444948	0.0098903
HRASLS5	81.6138	-1.13848	0.211936	-5.37183	7.79409e-08	2.81426e-07
PANK1	158.456	-1.13816	0.15732	-7.23469	4.66591e-13	2.34113e-12
ADCY1	74.162	-1.13622	0.213068	-5.33269	9.67683e-08	3.45702e-07
STEAP1B	45.7752	-1.13598	0.264244	-4.29897	1.71597e-05	5.03678e-05
ADD3	1407.13	-1.1358	0.0600711	-18.9075	9.89144e-80	2.55926e-78
NADK2	967.149	-1.13434	0.0629021	-18.0333	1.06647e-72	2.51675e-71
MINA	994.577	-1.13415	0.0659689	-17.1922	3.03688e-66	6.43325e-65
F12	503.237	-1.13349	0.092035	-12.3158	7.44666e-35	8.31818e-34
LOC101927859	2.3058	-1.13228	0.493634	-2.29377	0.0218039	0.0429281
LOC101927806	10.0721	-1.13132	0.46149	-2.45145	0.0142283	0.029014
RPP25	248.961	-1.13126	0.123673	-9.14716	5.84483e-20	4.03108e-19
THAP11	1055.92	-1.13085	0.0608636	-18.58	4.66413e-77	1.16468e-75
MALAT1	6226.59	-1.1307	0.0380748	-29.6968	8.44603e-194	6.20097e-192
PTGDR2	10.9463	-1.12949	0.438297	-2.577	0.00996622	0.0209238
POM121L1P	4.47722	-1.12836	0.504634	-2.23599	0.0253522	0.0491981
TCF4	275.812	-1.12817	0.116824	-9.65703	4.58979e-22	3.42838e-21
MIR210HG	2.33711	-1.12808	0.493801	-2.28449	0.0223428	0.0438936
ITGAL	3858.5	-1.12756	0.0410629	-27.4594	5.36018e-166	3.28885e-164
MTUS1	350.449	-1.12674	0.103636	-10.8721	1.56481e-27	1.40751e-26
NTHL1	527.046	-1.12645	0.0873483	-12.896	4.73862e-38	5.79015e-37
VASH2	271.61	-1.12591	0.117447	-9.58656	9.10725e-22	6.73247e-21
GLI3	340.631	-1.12588	0.107318	-10.4911	9.49464e-26	8.05918e-25
PTPRU	770.298	-1.12556	0.0705485	-15.9544	2.65532e-57	4.86856e-56
LOC102723756	2.79672	-1.12442	0.504081	-2.23063	0.0257059	0.0498171
BTN3A2	586.624	-1.12407	0.0791992	-14.1929	1.01336e-45	1.47914e-44
RN7SL1	299.164	-1.12375	0.235077	-4.78035	1.74993e-06	5.65427e-06
ZNF514	139.953	-1.12297	0.160671	-6.98925	2.76351e-12	1.3284e-11
CBY3	12.0045	-1.12175	0.428159	-2.61994	0.00879464	0.0186166
SLC2A4	20.3568	-1.12174	0.355912	-3.15173	0.00162304	0.00383811
ARHGAP25	264.066	-1.12048	0.118583	-9.44889	3.42442e-21	2.48025e-20
ZSWIM5	84.2828	-1.12039	0.210803	-5.31487	1.06734e-07	3.80276e-07
GLB1L3	1060.19	-1.11989	0.068497	-16.3495	4.38536e-60	8.35261e-59
PGAM1P5	7.07478	-1.11918	0.479899	-2.33211	0.0196948	0.039111
LOC101928431	7.67365	-1.11814	0.472201	-2.36794	0.0178874	0.0357915
PGP	789.191	-1.11618	0.0701442	-15.9127	5.1765e-57	9.43078e-56
GK	140.053	-1.11592	0.157653	-7.07835	1.4588e-12	7.12602e-12
FLOT2	1086.64	-1.11585	0.0621044	-17.9674	3.51031e-72	8.1939e-71
LOC101928806	25.0197	-1.11392	0.334416	-3.33095	0.00086549	0.00212568
GRIN2C	15.4695	-1.1131	0.397822	-2.79799	0.00514209	0.0113156
RASSF1-AS1	10.3038	-1.11266	0.44145	-2.52047	0.0117199	0.0243055
BTBD11	12.797	-1.11171	0.419644	-2.64917	0.00806895	0.017182
PPARGC1B	394.723	-1.11147	0.106477	-10.4385	1.65376e-25	1.39136e-24
TUBB4A	1139.67	-1.11113	0.0628631	-17.6753	6.49456e-70	1.45661e-68
LPCAT1	53.5594	-1.1109	0.244004	-4.55281	5.29344e-06	1.63416e-05
PHRF1-2	22.2251	-1.10987	0.355119	-3.12535	0.00177594	0.00417955
GNAZ	21.9889	-1.1097	0.357059	-3.10789	0.00188426	0.00442174
CAMKK1	191.355	-1.10909	0.145763	-7.60886	2.7652e-14	1.49579e-13
RASSF4	361.146	-1.10895	0.103008	-10.7657	4.99575e-27	4.42407e-26
TLR9	55.779	-1.10746	0.244682	-4.52614	6.00709e-06	1.83928e-05
BMP10	22.4121	-1.10657	0.350769	-3.1547	0.00160661	0.00380343
TMEFF1	21.8938	-1.10629	0.34949	-3.16544	0.00154851	0.003675
EIF2AK4	1951	-1.10516	0.0472456	-23.3918	5.17586e-121	2.12223e-119
RAB11FIP5	544.051	-1.10494	0.0856904	-12.8946	4.82787e-38	5.89501e-37
PFKFB4	143.512	-1.10278	0.153302	-7.19355	6.31301e-13	3.14279e-12
KCNAB1	19.1429	-1.1022	0.367297	-3.00084	0.00269239	0.00618635
ATP2B4	3512.47	-1.10109	0.04614	-23.864	7.24837e-126	3.15258e-124
STMN3	1038.95	-1.10051	0.0641841	-17.1462	6.71007e-66	1.411e-64
C16orf59	702.161	-1.10022	0.0760531	-14.4664	1.97451e-47	2.98347e-46
PLXNA4	9.12245	-1.09894	0.453066	-2.42557	0.0152843	0.0309432
RP4-639F20.1	6.94595	-1.09838	0.479488	-2.29073	0.0219792	0.0432436
SMTNL2	11.265	-1.09813	0.433151	-2.5352	0.0112382	0.0233942
TRIM8	1612.3	-1.09727	0.0526292	-20.849	1.55629e-96	4.95132e-95
CCDC51	281.198	-1.09646	0.111925	-9.79632	1.16758e-22	8.86002e-22
LOC101927235	8.60926	-1.09506	0.465728	-2.3513	0.0187082	0.0373034
MAGI1	229.044	-1.09468	0.125485	-8.72355	2.69618e-18	1.74399e-17
SNPH	221.123	-1.09353	0.126472	-8.64648	5.31147e-18	3.39223e-17
TBC1D9B	3423.86	-1.09331	0.0383983	-28.4728	2.54322e-178	1.70674e-176
TRADD	280.524	-1.0933	0.114954	-9.51072	1.89342e-21	1.38657e-20
UBALD1	378.409	-1.09226	0.101595	-10.7511	5.85534e-27	5.17729e-26
PLEKHF1	247.256	-1.09206	0.123243	-8.86103	7.92802e-19	5.24869e-18
CABLES2	430.852	-1.08891	0.100494	-10.8356	2.33489e-27	2.09142e-26
NLRP11	66.7488	-1.08836	0.223603	-4.86738	1.13089e-06	3.70212e-06
SENCR	23.7664	-1.08835	0.342808	-3.17481	0.00149934	0.00356719
UGT3A2	754.882	-1.08829	0.0725385	-15.0029	7.02636e-51	1.1388e-49
ANO5	86.9635	-1.08804	0.196207	-5.54535	2.93371e-08	1.09401e-07
LOC101929385	10.5547	-1.08718	0.437355	-2.48582	0.0129255	0.026594
ASAP2	102.716	-1.08599	0.182514	-5.95018	2.6785e-09	1.07742e-08
UNC13B	865.983	-1.08479	0.0679474	-15.9652	2.23348e-57	4.09949e-56
FBLIM1	7.50582	-1.08359	0.473841	-2.28682	0.0222066	0.043651
HMX2	15.237	-1.0828	0.405638	-2.66937	0.00759932	0.0162687
ZNRF1	2391.78	-1.08208	0.0450394	-24.0252	1.51529e-127	6.67503e-126
EPHA10	123.386	-1.0818	0.169888	-6.36775	1.91823e-10	8.28435e-10
ZSCAN2	253.105	-1.08133	0.121143	-8.92604	4.41544e-19	2.95165e-18
PCDH9	279.156	-1.08069	0.115772	-9.33458	1.01393e-20	7.19509e-20
RALGPS1	210.309	-1.08058	0.129066	-8.37234	5.64859e-17	3.4584e-16
LAMB2P1	10.158	-1.08055	0.445023	-2.42807	0.0151792	0.0307523
KIAA1161	185.159	-1.07982	0.148631	-7.2651	3.72756e-13	1.88629e-12
SLC39A11	366.238	-1.07904	0.102643	-10.5126	7.55942e-26	6.442e-25
ZNF821	23.0372	-1.07893	0.340002	-3.1733	0.00150718	0.00358385
FBXL22	11.0336	-1.0781	0.435678	-2.47453	0.0133411	0.0273639
AKAP3	32.3303	-1.07751	0.300792	-3.58225	0.00034065	0.000878075
RCBTB2	280.451	-1.07601	0.121324	-8.86885	7.39027e-19	4.90212e-18
BLK	454.49	-1.07485	0.0921165	-11.6683	1.85001e-31	1.874e-30
TLX2	166.078	-1.07464	0.147654	-7.27809	3.38575e-13	1.71787e-12
LOC102723521	1193.13	-1.07459	0.0619341	-17.3505	1.95629e-67	4.24356e-66
PIK3R6	67.4474	-1.07444	0.229813	-4.67527	2.93569e-06	9.30024e-06
COL9A2	106.371	-1.07308	0.176545	-6.07827	1.21488e-09	4.99679e-09
LOC102724141	13.0063	-1.07261	0.413526	-2.59381	0.00949186	0.0199816
SIPA1L2	841.552	-1.07159	0.0672402	-15.9367	3.52432e-57	6.44812e-56
GNG2	1529.41	-1.07125	0.0531688	-20.1481	2.79626e-90	8.42803e-89
CDH4-2	24.0306	-1.07091	0.335337	-3.19354	0.00140542	0.00335768
TMEM178B	28.221	-1.07068	0.318034	-3.36657	0.000761085	0.00188461
CTBP1-AS	78.4049	-1.06801	0.211488	-5.04998	4.41867e-07	1.49641e-06
ADC	34.6834	-1.06785	0.300836	-3.54961	0.000385804	0.000988805
HSD11B1L	44.1278	-1.06662	0.263605	-4.04629	5.20355e-05	0.000145883
TST	70.8276	-1.06657	0.225534	-4.72911	2.2551e-06	7.22138e-06
LOC400622	16.1896	-1.06591	0.389195	-2.73874	0.00616745	0.0133767
FAM50B	20.4594	-1.0656	0.360706	-2.95421	0.0031347	0.00712638
RN7SL2	327.397	-1.0654	0.25069	-4.24986	2.13902e-05	6.22433e-05
DBN1	4082.25	-1.06533	0.040747	-26.1449	1.12512e-150	6.1954e-149
MYOZ3	24.9476	-1.06386	0.336332	-3.16314	0.00156078	0.00370158
MRPL34	738.434	-1.06362	0.0709595	-14.9891	8.65245e-51	1.39839e-49
TKTL1	29.4016	-1.06331	0.324282	-3.27896	0.0010419	0.0025343
FGF14-AS2	97.8145	-1.06279	0.184541	-5.75907	8.45765e-09	3.28887e-08
KLHL21	1416.36	-1.06176	0.0634087	-16.7448	6.18434e-63	1.22123e-61
TMUB1	1580.41	-1.06156	0.0554471	-19.1455	1.05422e-81	2.79497e-80
DPYSL2	838.12	-1.06093	0.0680728	-15.5852	9.17288e-55	1.5999e-53
CCND3	5704.45	-1.06045	0.0335611	-31.5975	3.99156e-219	3.21948e-217
GTSE1-AS1	22.9329	-1.06007	0.346139	-3.06255	0.00219461	0.0051054
C10orf95	20.6645	-1.05969	0.354151	-2.9922	0.00276977	0.00634886
STX18-AS1	15.0659	-1.05905	0.393847	-2.68898	0.00716698	0.0154084
CTNNBIP1	616.441	-1.05901	0.0782467	-13.5343	9.81146e-42	1.30972e-40
PALM	116.344	-1.05882	0.174027	-6.08425	1.17039e-09	4.82191e-09
FBLN2	4015.45	-1.05865	0.0383893	-27.5766	2.12431e-167	1.32231e-165
ABCA7	530.155	-1.05751	0.0918099	-11.5185	1.06408e-30	1.05547e-29
UCK2	3029.28	-1.05733	0.038798	-27.2523	1.56288e-163	9.4543e-162
C14orf132	131.558	-1.05665	0.163092	-6.47886	9.24175e-11	4.07007e-10
PPP1R3B	604.77	-1.05447	0.077722	-13.5673	6.26244e-42	8.39225e-41
RNF213	3065.19	-1.05445	0.182899	-5.76521	8.15562e-09	3.1743e-08
POC1A	817.91	-1.05379	0.0681668	-15.459	6.56299e-54	1.12415e-52
FLI1	1025.47	-1.05362	0.0625272	-16.8505	1.03971e-63	2.08915e-62
GIPC1	578.572	-1.0533	0.0801618	-13.1396	1.95162e-39	2.46536e-38
FRAT1	88.3014	-1.05279	0.194485	-5.41323	6.1897e-08	2.25104e-07
ARL4A	193.999	-1.0524	0.141006	-7.46353	8.42332e-14	4.4404e-13
PRKCQ	988.368	-1.05222	0.062206	-16.915	3.48835e-64	7.08391e-63
FYB	2135.29	-1.0514	0.0452526	-23.234	2.06271e-119	8.37764e-118
GXYLT2	302.695	-1.05075	0.108337	-9.69893	3.04691e-22	2.28984e-21
CGN	415.512	-1.05068	0.0941823	-11.1559	6.70405e-29	6.30754e-28
LRSAM1	400.419	-1.05011	0.0973957	-10.7819	4.19194e-27	3.72569e-26
HMHA1	4494.45	-1.04942	0.0366757	-28.6136	4.5529e-180	3.07948e-178
SLC15A2	46.5954	-1.04829	0.264158	-3.96842	7.23517e-05	0.000199743
PHLDA3	195.017	-1.04588	0.134216	-7.7925	6.56972e-15	3.67289e-14
C21orf128	1.64072	-1.04542	0.463752	-2.25426	0.02418	0.0471416
LOC102724596	1.6397	-1.04511	0.463721	-2.25374	0.0242127	0.0472
TBC1D19	287.25	-1.04493	0.113592	-9.19897	3.61386e-20	2.51463e-19
MLC1	24.6918	-1.04449	0.348448	-2.99755	0.00272163	0.00624851
KIF3C	155.786	-1.04313	0.147279	-7.08265	1.41422e-12	6.91808e-12
ONECUT2	264.609	-1.04305	0.121329	-8.59688	8.19107e-18	5.19655e-17
TFAP2A	323.311	-1.04155	0.104948	-9.92441	3.2602e-23	2.52299e-22
EEF2K	505.002	-1.04116	0.0867687	-11.9993	3.58481e-33	3.81108e-32
KCNAB2	7052.56	-1.04076	0.0364544	-28.5497	2.83383e-179	1.90922e-177
METRN	349.01	-1.0403	0.10615	-9.80029	1.12265e-22	8.53787e-22
PNMAL2	34.8305	-1.03868	0.294851	-3.52273	0.000427119	0.00109
MAL	459.659	-1.03779	0.0949922	-10.925	8.75489e-28	7.9246e-27
WASF3	43.8905	-1.03769	0.273302	-3.79687	0.000146533	0.000392367
OAS2	521.818	-1.03694	0.0869914	-11.9201	9.30339e-33	9.77568e-32
CLEC11A	1194.49	-1.03682	0.0638138	-16.2476	2.32456e-59	4.35981e-58
EGLN1	930.795	-1.03667	0.0680949	-15.2239	2.45346e-52	4.06073e-51
SLBP	3041.85	-1.03627	0.0403197	-25.7013	1.12997e-145	5.79488e-144
TMEM63A	351.122	-1.03563	0.102027	-10.1505	3.29716e-24	2.6408e-23
ZNF831	45.8355	-1.03515	0.256691	-4.03266	5.51483e-05	0.000154232
CELSR2	402.473	-1.03512	0.103293	-10.0213	1.2293e-23	9.64792e-23
RNFT2	181.233	-1.03419	0.139685	-7.40377	1.32375e-13	6.88946e-13
LOC100505504	36.9241	-1.03346	0.293446	-3.5218	0.000428626	0.0010932
CDT1	3610.09	-1.03274	0.0395472	-26.1142	2.51813e-150	1.37776e-148
DENND2D	271.933	-1.03182	0.116893	-8.82706	1.07466e-18	7.07109e-18
ASTN2	111.358	-1.03163	0.177043	-5.82702	5.6427e-09	2.22037e-08
POLR3H	1476.86	-1.03135	0.0527643	-19.5463	4.43755e-85	1.22568e-83
GIMAP8	39.2383	-1.03107	0.274344	-3.75831	0.000171065	0.000454727
HBQ1	44.8309	-1.02902	0.270463	-3.80467	0.000141993	0.000380688
OSR2	77.315	-1.02887	0.207307	-4.96301	6.94104e-07	2.31144e-06
C2CD2	70.544	-1.02833	0.214347	-4.79752	1.60642e-06	5.20626e-06
FAM217B	1286.99	-1.02832	0.0559362	-18.3839	1.7692e-75	4.31746e-74
ZFP3	13.4533	-1.02803	0.417547	-2.46206	0.0138141	0.0282297
FANCE	175.248	-1.0274	0.14591	-7.04132	1.90424e-12	9.24673e-12
GNG7	31.4026	-1.02732	0.301287	-3.40976	0.000650204	0.00162268
STRA13	999.23	-1.0271	0.062385	-16.4639	6.67062e-61	1.28333e-59
PKIG	242.248	-1.027	0.122008	-8.4175	3.84603e-17	2.38108e-16
GIMAP6	671.944	-1.02662	0.0755567	-13.5875	4.75316e-42	6.38462e-41
PDLIM1	1494.87	-1.02424	0.0516911	-19.8146	2.22709e-87	6.34519e-86
XPC	1004.35	-1.02382	0.0634993	-16.1233	1.75086e-58	3.25187e-57
ADAMTS17	101.551	-1.0234	0.184684	-5.54135	3.00152e-08	1.11881e-07
HOXD13	1147.79	-1.0233	0.0601191	-17.0213	5.7101e-65	1.18192e-63
ALS2CL	57.5424	-1.02271	0.239423	-4.27158	1.94093e-05	5.67288e-05
CROCC	702.488	-1.02108	0.0735124	-13.8899	7.29028e-44	1.01497e-42
PAGR1	1325.12	-1.02093	0.0544733	-18.7418	2.25842e-78	5.7481e-77
C12orf65	516.499	-1.02091	0.0865349	-11.7977	4.01335e-32	4.14359e-31
PTCD1	28.823	-1.02089	0.316635	-3.22418	0.00126333	0.00304062
ZNF174	257.05	-1.01874	0.116381	-8.75354	2.06767e-18	1.34555e-17
SLC11A1	11.8361	-1.01867	0.43361	-2.34928	0.0188098	0.0374756
KNOP1	355.357	-1.01821	0.101126	-10.0688	7.59055e-24	6.00671e-23
ST6GALNAC4	143.957	-1.01811	0.157073	-6.48173	9.06752e-11	3.99641e-10
PPARA	561.127	-1.01763	0.0823216	-12.3616	4.21503e-35	4.72986e-34
ARMC4	23.2359	-1.01761	0.349955	-2.90784	0.00363938	0.00819402
SNHG19	190.848	-1.01718	0.139504	-7.29141	3.06734e-13	1.56093e-12
LRRC34	187.929	-1.01696	0.136271	-7.46279	8.47099e-14	4.46279e-13
VASH1	238.325	-1.01654	0.121087	-8.39514	4.65328e-17	2.86227e-16
ITGA6	98.4657	-1.01646	0.189563	-5.36214	8.22428e-08	2.96274e-07
DMTN	91.5896	-1.01614	0.196178	-5.17971	2.22228e-07	7.72536e-07
DNAJB13	24.1593	-1.01603	0.343217	-2.9603	0.00307342	0.00700097
PARP12	468.527	-1.01393	0.0912746	-11.1085	1.13996e-28	1.06264e-27
TTC28-AS1	179.674	-1.01357	0.14398	-7.03968	1.92682e-12	9.35107e-12
IQCH-AS1	50.4957	-1.01322	0.248733	-4.07353	4.63062e-05	0.000130603
SLC5A2	9.61808	-1.01121	0.446663	-2.26392	0.0235791	0.046122
OGFOD2	741.324	-1.01099	0.0728677	-13.8743	9.07054e-44	1.25874e-42
PXMP4	103.162	-1.01084	0.187651	-5.3868	7.17239e-08	2.59523e-07
C16orf54	162.337	-1.01056	0.146792	-6.88433	5.80584e-12	2.73797e-11
LOC100128361	63.6255	-1.01021	0.241627	-4.18086	2.90404e-05	8.33885e-05
LMTK3	61.4634	-1.01012	0.237122	-4.2599	2.04523e-05	5.96351e-05
HPS4	1374.39	-1.00956	0.0550597	-18.3357	4.29294e-75	1.04466e-73
CDKN2C	2131.47	-1.00943	0.0477912	-21.1217	5.02436e-99	1.64104e-97
SKIDA1	22.0563	-1.00907	0.348607	-2.89458	0.0037967	0.00851977
C9orf9	385.195	-1.00899	0.0968486	-10.4182	2.04709e-25	1.71473e-24
PWWP2B	231.654	-1.00849	0.125258	-8.05131	8.19151e-16	4.75118e-15
HYLS1	197.809	-1.00838	0.135559	-7.43867	1.01704e-13	5.32383e-13
MFHAS1	1719.17	-1.00829	0.0495707	-20.3404	5.64265e-92	1.728e-90
DUS2	546.372	-1.00765	0.0825763	-12.2027	3.00852e-34	3.30264e-33
TLR5	12.0443	-1.00589	0.424506	-2.36956	0.017809	0.0356513
EDA	98.1791	-1.00547	0.191052	-5.26282	1.41866e-07	5.0139e-07
SLC25A10	829.047	-1.0051	0.0740791	-13.568	6.20158e-42	8.31718e-41
PXN-AS1	47.2848	-1.00392	0.254363	-3.94682	7.91946e-05	0.00021762
EEPD1	164.792	-1.0032	0.146762	-6.83557	8.1678e-12	3.82768e-11
LOC101929174	12.9958	-1.00305	0.414991	-2.41704	0.0156471	0.0316144
DHX58	158.317	-1.00071	0.16055	-6.23297	4.57662e-10	1.92853e-09
KIAA1257	19.5429	-1.00058	0.369223	-2.70995	0.00672931	0.0145202
PDF	350.328	-1.00018	0.101395	-9.86423	5.9491e-23	4.55259e-22
PSRC1	418.953	-0.999887	0.0946547	-10.5635	4.39849e-26	3.77642e-25
WFIKKN1	10.1603	-0.99976	0.443345	-2.25504	0.024131	0.0470675
CPT1A	3899.97	-0.998916	0.0396389	-25.2004	3.96772e-140	1.94203e-138
TBC1D5	1507.76	-0.998803	0.0546701	-18.2696	1.4444e-74	3.49503e-73
MFSD3	91.7308	-0.998153	0.192192	-5.19353	2.06342e-07	7.20373e-07
ACY3	41.8823	-0.997304	0.270807	-3.68271	0.000230764	0.000606289
AFF1	1450.4	-0.997281	0.0582957	-17.1073	1.30989e-65	2.74103e-64
TMTC4	293.885	-0.99702	0.114965	-8.67241	4.23082e-18	2.71113e-17
ADRBK1	5192.61	-0.995994	0.0360604	-27.6201	6.37557e-168	3.99753e-166
NAT8L	61.6177	-0.995077	0.238959	-4.16422	3.12416e-05	8.94998e-05
FAM43A	13.0918	-0.994618	0.415867	-2.39168	0.0167716	0.033716
NYNRIN	23.9781	-0.993899	0.340912	-2.91542	0.00355215	0.00800971
TRIM46	135.699	-0.993859	0.164885	-6.0276	1.66417e-09	6.78625e-09
PNMA6A	21.5876	-0.993174	0.350931	-2.83011	0.00465316	0.010307
RGPD2	27.8418	-0.993022	0.326314	-3.04314	0.0023412	0.00542877
MBNL1-AS1	24.0339	-0.992821	0.336149	-2.95351	0.00314178	0.00713966
NDRG2	245.988	-0.992758	0.12112	-8.19651	2.4746e-16	1.47822e-15
DUSP28	133.815	-0.992681	0.157395	-6.30692	2.84636e-10	1.21462e-09
LOC93622	522.044	-0.991472	0.0844073	-11.7463	7.38007e-32	7.5515e-31
ATP8B3	308.692	-0.991005	0.106445	-9.31004	1.27784e-20	9.02314e-20
ESYT3	146.756	-0.990824	0.162784	-6.08675	1.15223e-09	4.74933e-09
RADIL	105.877	-0.990338	0.182311	-5.43214	5.56815e-08	2.03664e-07
SAMD1	1181.18	-0.989492	0.0612239	-16.1619	9.36981e-59	1.74781e-57
NME3	61.6989	-0.989397	0.225411	-4.3893	1.13719e-05	3.39417e-05
ADORA1	21.5638	-0.989262	0.349065	-2.83403	0.00459651	0.010192
ENTPD1	167.455	-0.988899	0.142975	-6.91661	4.6258e-12	2.19352e-11
LOC102724064	14.1737	-0.987463	0.434568	-2.27228	0.0230693	0.0452297
SKP2	1660.51	-0.986888	0.0515681	-19.1376	1.22844e-81	3.24687e-80
SLC25A23	849.075	-0.986554	0.0681446	-14.4774	1.68462e-47	2.54994e-46
NLRC3	515.141	-0.986373	0.0862136	-11.441	2.60737e-30	2.54805e-29
SH3TC1	862.041	-0.985444	0.0680042	-14.4909	1.38281e-47	2.10236e-46
BCL7A	2094.48	-0.985188	0.0468526	-21.0274	3.68291e-98	1.1871e-96
CBX4	1137.01	-0.984987	0.059505	-16.553	1.52248e-61	2.95884e-60
MAP4	2875.27	-0.98441	0.0417414	-23.5836	5.68497e-123	2.39382e-121
P2RX1	20.8503	-0.98404	0.366756	-2.6831	0.00729442	0.0156609
LOC101929004	28.2969	-0.98384	0.316232	-3.11114	0.00186368	0.00437404
LOC100630918	42.7755	-0.983568	0.279894	-3.51408	0.000441281	0.00112414
ZDHHC14	78.6101	-0.982487	0.202974	-4.84046	1.29537e-06	4.21885e-06
ARHGAP12	203.518	-0.982226	0.135527	-7.24744	4.24725e-13	2.13919e-12
OSBPL1A	379.83	-0.981117	0.0982915	-9.98171	1.83273e-23	1.43119e-22
IDH1	676.932	-0.980879	0.0733093	-13.38	7.91389e-41	1.03392e-39
ADCY7	1656.55	-0.980147	0.0494286	-19.8296	1.65467e-87	4.72212e-86
CALHM2	121.805	-0.978742	0.170146	-5.75237	8.79992e-09	3.41193e-08
DDX11-AS1	13.4425	-0.97844	0.408616	-2.39453	0.0166419	0.0334708
PCBP4	441.733	-0.978015	0.0954219	-10.2494	1.19119e-24	9.72651e-24
PEG10	68.9307	-0.977414	0.221808	-4.40659	1.05013e-05	3.14142e-05
SPATS2L	400.539	-0.977024	0.0965523	-10.1191	4.54497e-24	3.62838e-23
RIMBP3	56.1508	-0.976624	0.23642	-4.13088	3.61374e-05	0.000102953
NR2F6	327.039	-0.976569	0.108147	-9.02999	1.71694e-19	1.16176e-18
YBX2	256.096	-0.975811	0.124287	-7.85125	4.11924e-15	2.32104e-14
MARVELD1	483.66	-0.975792	0.0889054	-10.9756	5.00572e-28	4.57925e-27
ZNF775	166.767	-0.975621	0.152191	-6.4105	1.45042e-10	6.31162e-10
MESP1	64.2212	-0.974568	0.221942	-4.39109	1.12783e-05	3.36802e-05
AIFM2	15.2949	-0.972911	0.406083	-2.39584	0.0165821	0.0333545
FLT3LG	88.891	-0.972245	0.20327	-4.78302	1.72679e-06	5.58162e-06
TLE6	33.0505	-0.971908	0.294678	-3.2982	0.000973061	0.00237528
FOXRED2	2033.08	-0.971321	0.0473755	-20.5026	2.03981e-93	6.31421e-92
MNT	521.956	-0.969143	0.0842625	-11.5015	1.29689e-30	1.28196e-29
TRAF3IP2	82.219	-0.968084	0.201986	-4.79283	1.64445e-06	5.32648e-06
COL9A3	24.0299	-0.96782	0.339232	-2.85297	0.00433124	0.00964119
ARHGAP35	1434	-0.967746	0.058246	-16.6148	5.44381e-62	1.06278e-60
RNF208	305.562	-0.967478	0.110248	-8.77549	1.70154e-18	1.11024e-17
LOC101929054	22.6867	-0.96716	0.346555	-2.79078	0.00525813	0.0115458
HK2	1417.91	-0.966025	0.0549805	-17.5703	4.15721e-69	9.2275e-68
C10orf91	19.6592	-0.964746	0.361544	-2.66841	0.00762112	0.0163093
GAB2	59.8655	-0.964576	0.231028	-4.17515	2.97789e-05	8.5495e-05
PPFIA4	49.9525	-0.964181	0.257973	-3.73753	0.000185839	0.000492551
BRD3	899.664	-0.963448	0.0672543	-14.3254	1.5178e-46	2.25764e-45
GFRA1	434.689	-0.963233	0.0957848	-10.0562	8.6251e-24	6.80971e-23
EHD3	39.6576	-0.962307	0.281044	-3.42405	0.000616958	0.00154464
AMOT	198.925	-0.962172	0.139808	-6.88208	5.89843e-12	2.77935e-11
RP11-1072A3.2	30.6211	-0.961914	0.311872	-3.08433	0.00204014	0.00476801
AK8	32.5362	-0.961158	0.297873	-3.22673	0.00125212	0.00301576
C1orf74	71.3708	-0.960598	0.216671	-4.43345	9.27374e-06	2.78634e-05
ABCG4	31.2499	-0.960423	0.306409	-3.13445	0.00172178	0.00405932
TMEM9	418.516	-0.960236	0.0918691	-10.4522	1.43127e-25	1.20891e-24
CHEK2	616.464	-0.960181	0.0799197	-12.0143	2.98847e-33	3.18696e-32
FAM134B	406.33	-0.960145	0.0979975	-9.79764	1.15244e-22	8.75286e-22
FBXO43	136.558	-0.960036	0.192623	-4.98401	6.22784e-07	2.08363e-06
PLEKHO1	1401.23	-0.958247	0.0532382	-17.9993	1.9744e-72	4.64659e-71
MPP2	462.178	-0.958122	0.088442	-10.8333	2.39287e-27	2.14223e-26
TSNARE1	216.78	-0.95788	0.132955	-7.20453	5.82426e-13	2.90874e-12
TMEM238	52.1317	-0.957816	0.248583	-3.8531	0.000116632	0.000315053
C1QTNF3	28.9436	-0.956544	0.316054	-3.02652	0.00247384	0.00571244
LOC100505555	50.9335	-0.955909	0.26245	-3.64225	0.000270264	0.000705
NUDT8	531.314	-0.955627	0.0842072	-11.3485	7.54329e-30	7.29284e-29
PCSK4	216.22	-0.955392	0.138915	-6.87752	6.09032e-12	2.86858e-11
FLT4	466.054	-0.955361	0.0934369	-10.2247	1.5377e-24	1.24553e-23
GEMIN7	234.874	-0.953635	0.126996	-7.50915	5.95114e-14	3.16927e-13
CCDC102B	39.926	-0.952148	0.288928	-3.29545	0.000982633	0.00239762
KIAA0930	1287.12	-0.95182	0.0548739	-17.3456	2.12961e-67	4.61372e-66
TMEM86B	655.03	-0.950753	0.0856167	-11.1048	1.18937e-28	1.1081e-27
LOC102723864	20.4949	-0.949906	0.356878	-2.66171	0.00777447	0.0166002
SIGLEC6	27.3019	-0.949606	0.316673	-2.9987	0.00271135	0.00622656
ARL3	622.302	-0.94832	0.0764871	-12.3984	2.6652e-35	3.01635e-34
EBF2	29.274	-0.948219	0.313999	-3.01981	0.00252931	0.00583425
RCAN1	927.15	-0.947102	0.0654096	-14.4796	1.63146e-47	2.47383e-46
HUNK	522.861	-0.946197	0.0844464	-11.2047	3.86678e-29	3.65811e-28
MRPS34	1391.85	-0.945812	0.0564942	-16.7418	6.50462e-63	1.283e-61
LRRC3DN	21.4158	-0.944242	0.367359	-2.57035	0.0101596	0.0213089
TRAT1	89.8064	-0.944126	0.210338	-4.48862	7.16854e-06	2.17578e-05
AGAP3	759.818	-0.943767	0.071138	-13.2667	3.61163e-40	4.65126e-39
LIPT1	114.332	-0.942982	0.192093	-4.90899	9.1545e-07	3.02102e-06
CARHSP1	2086.13	-0.942714	0.0461404	-20.4314	8.78669e-93	2.71015e-91
DGAT2	251.112	-0.941157	0.118024	-7.97431	1.5323e-15	8.80726e-15
EGLN2	51.6595	-0.940728	0.244853	-3.84201	0.000122033	0.000329177
PVRIG	657.465	-0.939737	0.083544	-11.2484	2.3581e-29	2.24818e-28
STUB1	968.218	-0.939275	0.0662588	-14.1759	1.29242e-45	1.88009e-44
CCDC88C	2432.74	-0.938987	0.0463327	-20.2662	2.55799e-91	7.7781e-90
S100Z	16.9606	-0.938152	0.388603	-2.41417	0.0157711	0.0318276
RORA	273.709	-0.938105	0.115822	-8.09955	5.51631e-16	3.23007e-15
CYTH1	2276.9	-0.937468	0.0444799	-21.0762	1.31473e-98	4.26172e-97
FAM64A	716.852	-0.93735	0.0730639	-12.8292	1.12547e-37	1.36358e-36
ZSCAN5A	110.422	-0.936448	0.176631	-5.30173	1.1471e-07	4.07594e-07
DNAH2	22.0657	-0.936358	0.351769	-2.66185	0.00777116	0.0165952
ARL11	119.96	-0.936347	0.169828	-5.5135	3.51776e-08	1.30361e-07
MBLAC2	277.394	-0.93596	0.116086	-8.06261	7.46795e-16	4.34471e-15
LOC102723407	69.3006	-0.935704	0.218154	-4.28918	1.7933e-05	5.2575e-05
TACC3	2641.1	-0.935281	0.0428451	-21.8293	1.22179e-105	4.34582e-104
ADPRHL1	118.631	-0.935041	0.172829	-5.41022	6.29488e-08	2.28735e-07
SPIRE1	78.0828	-0.934802	0.207442	-4.50632	6.59603e-06	2.00921e-05
FAM195A	552.059	-0.934353	0.0828561	-11.2768	1.70809e-29	1.63939e-28
GTF2IRD1	170.154	-0.934254	0.146805	-6.36389	1.96702e-10	8.47804e-10
PM20D2	1701.85	-0.934107	0.0584803	-15.973	1.97046e-57	3.62059e-56
EPHA1	19.7784	-0.933466	0.362129	-2.57772	0.00994559	0.0208831
SLC14A2	15.4644	-0.933334	0.401408	-2.32515	0.0200639	0.0397668
SCARB2	701.922	-0.932991	0.0744442	-12.5328	4.94134e-36	5.7128e-35
GLTPD2	27.2457	-0.932214	0.322291	-2.89246	0.00382243	0.00857413
PQLC2	132.24	-0.931846	0.169322	-5.50341	3.72518e-08	1.37863e-07
PTK7	1427.79	-0.931696	0.0592968	-15.7124	1.24351e-55	2.20016e-54
ARHGAP1	1453.49	-0.931528	0.05214	-17.8659	2.17459e-71	5.00126e-70
CYP1B1	12.6222	-0.931254	0.414732	-2.24544	0.0247401	0.0481026
SLC25A42	305.091	-0.929597	0.118269	-7.86003	3.8404e-15	2.16748e-14
SLC10A3	284.327	-0.92888	0.111928	-8.2989	1.05084e-16	6.37028e-16
SNTA1	292.764	-0.928784	0.109742	-8.46336	2.59793e-17	1.62241e-16
SLC16A14	138.592	-0.928307	0.162532	-5.71152	1.11969e-08	4.30244e-08
VWCE	163.354	-0.928306	0.146986	-6.31562	2.6908e-10	1.14995e-09
UNC93B1	371.233	-0.927756	0.100938	-9.19138	3.87832e-20	2.69537e-19
C1orf21	325.315	-0.927286	0.105429	-8.79538	1.42567e-18	9.32e-18
MID1IP1	1996.27	-0.927219	0.0454159	-20.4162	1.20068e-92	3.69672e-91
WDFY4	27.3309	-0.926281	0.329206	-2.81368	0.0048978	0.0108141
LINC00263	18.0081	-0.925874	0.375605	-2.46502	0.0137005	0.0280208
MGAT4A	1784.52	-0.925377	0.0549599	-16.8373	1.30023e-63	2.60047e-62
GABRD	23.094	-0.92368	0.358332	-2.57772	0.00994541	0.0208831
APOE	17.0752	-0.922631	0.393731	-2.3433	0.019114	0.0380464
PPP1R13L	102.893	-0.922186	0.181296	-5.08665	3.64448e-07	1.24403e-06
MYO16	37.0105	-0.921863	0.295423	-3.12049	0.00180551	0.00424506
PPP1R14B	2596.21	-0.921374	0.0457889	-20.1222	4.71733e-90	1.41685e-88
CALML4	232.488	-0.920833	0.120811	-7.62208	2.49623e-14	1.35499e-13
ZBTB46	83.2401	-0.919766	0.205375	-4.47847	7.51796e-06	2.27672e-05
LOC100287042	66.8226	-0.918882	0.223322	-4.11461	3.87833e-05	0.000110004
ONECUT1	18.6622	-0.918496	0.370123	-2.48159	0.0130796	0.0268628
MID1	104.502	-0.917861	0.178432	-5.14404	2.68895e-07	9.29126e-07
ADCK3	502.397	-0.91711	0.0861699	-10.643	1.87888e-26	1.63439e-25
ENPEP	42.8945	-0.916575	0.276259	-3.31782	0.000907241	0.0022225
XXYLT1	278.336	-0.916204	0.113675	-8.05985	7.63861e-16	4.43949e-15
EPS8L2	30.7919	-0.915937	0.303831	-3.01462	0.00257299	0.00592704
ARHGEF11	710.874	-0.915323	0.0718722	-12.7354	3.75821e-37	4.50252e-36
CXXC4	48.394	-0.915097	0.258754	-3.53656	0.00040538	0.00103653
C15orf52	13.8411	-0.914623	0.403077	-2.2691	0.0232622	0.0455643
AP2A2	136.962	-0.914076	0.161009	-5.67718	1.36935e-08	5.21859e-08
LKAAEAR1	39.1871	-0.913656	0.280323	-3.2593	0.00111687	0.00270709
FLJ22184	830.733	-0.91361	0.137476	-6.64562	3.01952e-11	1.37091e-10
ARL2	482.305	-0.912782	0.0875598	-10.4247	1.91328e-25	1.60421e-24
MANBA	201.147	-0.912705	0.131603	-6.9353	4.05359e-12	1.9275e-11
PSPH	655.683	-0.912107	0.0745286	-12.2384	1.93934e-34	2.13987e-33
PRDM5	25.1914	-0.911515	0.336581	-2.70816	0.00676573	0.0145951
RHPN1	1142.78	-0.91126	0.140483	-6.48663	8.77754e-11	3.87615e-10
C8orf82	451.091	-0.91122	0.0902888	-10.0923	5.97633e-24	4.73804e-23
ABLIM1	1816.4	-0.911085	0.0503268	-18.1034	2.99667e-73	7.12072e-72
SSBP2	931.553	-0.910624	0.0650495	-13.9989	1.58197e-44	2.24243e-43
MYCBP2	2194.64	-0.910445	0.130812	-6.95993	3.40447e-12	1.62469e-11
MMACHC	164.928	-0.910426	0.146943	-6.19577	5.79997e-10	2.43211e-09
KIAA0586	649.494	-0.910326	0.0765362	-11.8941	1.27076e-32	1.33201e-31
CACNA1C	15.4705	-0.910199	0.392354	-2.31984	0.0203495	0.0402724
CXXC1	2419.38	-0.909112	0.0528986	-17.1859	3.38378e-66	7.15047e-65
PDE10A	21.0428	-0.908836	0.356064	-2.55245	0.0106969	0.0223512
YDJC	1134.93	-0.90849	0.0627205	-14.4847	1.51302e-47	2.29627e-46
PACSIN1	30.6533	-0.907919	0.306065	-2.96643	0.00301283	0.00687025
AFF3	526.757	-0.907228	0.0881108	-10.2964	7.31128e-25	6.01282e-24
MGAT1	1572.38	-0.906499	0.0505563	-17.9305	6.8162e-72	1.57607e-70
PDK2	359.494	-0.906256	0.0995327	-9.10511	8.61804e-20	5.89872e-19
RP5-886K2.3	17.3216	-0.905243	0.382928	-2.364	0.0180788	0.0361366
TMEM97	1513.67	-0.904891	0.0566239	-15.9807	1.74146e-57	3.21011e-56
LOC100287896	34.9868	-0.904762	0.286334	-3.15981	0.00157872	0.00374257
KCTD1	238.753	-0.904565	0.121259	-7.4598	8.66544e-14	4.56104e-13
EFCAB4B	788.827	-0.903384	0.0696419	-12.9718	1.76724e-38	2.17955e-37
KDM4B	771.076	-0.902835	0.0717299	-12.5866	2.50265e-36	2.92089e-35
PTP4A2	11375.6	-0.901924	0.0271219	-33.2545	1.76003e-242	1.59986e-240
SRSF8	1094.48	-0.901451	0.0611682	-14.7373	3.71581e-49	5.79815e-48
ALDH1A2	7258.74	-0.901401	0.0284584	-31.6743	3.50686e-220	2.88267e-218
LOC100505761	134.614	-0.900556	0.163005	-5.52471	3.30024e-08	1.22511e-07
NUDT7	119.675	-0.8995	0.16594	-5.42063	5.939e-08	2.16399e-07
LOC100506797	17.2818	-0.8991	0.379497	-2.36919	0.0178273	0.0356837
CD3EAP	158.146	-0.89879	0.149562	-6.00948	1.86114e-09	7.56968e-09
GDE1	1175.75	-0.89861	0.0582971	-15.4143	1.31141e-53	2.2219e-52
SMO	588.269	-0.898564	0.0781184	-11.5026	1.28022e-30	1.26621e-29
EPSTI1	126.319	-0.898516	0.161812	-5.55284	2.81069e-08	1.04973e-07
AKR1C6P	32.0316	-0.898383	0.301013	-2.98453	0.00284012	0.00649885
RNASEH1-AS1	126.241	-0.897705	0.162298	-5.5312	3.18047e-08	1.18193e-07
ADAM22	222.857	-0.897596	0.130211	-6.89339	5.44765e-12	2.57258e-11
CAPN5	277.803	-0.895331	0.112638	-7.94872	1.88451e-15	1.07812e-14
2022-03-02	190.047	-0.895215	0.13601	-6.58197	4.64268e-11	2.0782e-10
UFSP1	25.6293	-0.894877	0.324293	-2.75947	0.00578953	0.0126256
ALKBH2	395.896	-0.894556	0.0989554	-9.03999	1.56682e-19	1.06227e-18
SPTAN1	9802.71	-0.89455	0.0358738	-24.936	3.02898e-137	1.45765e-135
PITPNC1	461.854	-0.894056	0.0908581	-9.84014	7.56093e-23	5.76806e-22
CCDC121	30.264	-0.893205	0.311911	-2.86365	0.00418784	0.00933906
SLC6A6	615.326	-0.893165	0.0794979	-11.2351	2.74276e-29	2.60479e-28
ATP6V1E2	97.2447	-0.892844	0.18861	-4.73382	2.20329e-06	7.06467e-06
AMIGO1	38.6603	-0.892632	0.28134	-3.17279	0.00150981	0.00358912
FOXO4	138.485	-0.891962	0.155073	-5.75188	8.8257e-09	3.42115e-08
MLLT1	2133.63	-0.890421	0.0457347	-19.4693	2.00163e-84	5.46709e-83
RNF44	1824.2	-0.890133	0.0532072	-16.7296	7.98278e-63	1.56915e-61
NME4	2483.84	-0.88963	0.0510959	-17.411	6.81243e-68	1.48337e-66
MIIP	534.197	-0.888733	0.0854681	-10.3984	2.52071e-25	2.10427e-24
LINC00977	52.3211	-0.888651	0.242261	-3.66815	0.000244311	0.00064012
TYSND1	523.525	-0.888491	0.0854397	-10.399	2.50449e-25	2.09174e-24
DIS3L	1293.67	-0.888273	0.0557814	-15.9242	4.30605e-57	7.86163e-56
LOC101929587	33.8418	-0.887766	0.297293	-2.98617	0.00282498	0.00646677
ANGPTL2	83.7377	-0.887715	0.196242	-4.52359	6.08008e-06	1.8603e-05
PLAC8	75.5868	-0.887686	0.209807	-4.23096	2.32691e-05	6.74365e-05
IQGAP2	2256.96	-0.887662	0.0456659	-19.4382	3.67019e-84	9.96112e-83
PDZD7	27.3617	-0.887445	0.320472	-2.76918	0.00561972	0.0122849
AMDHD2	276.394	-0.887103	0.1159	-7.65402	1.94798e-14	1.06175e-13
C9orf96	22.7029	-0.887043	0.338235	-2.62257	0.00872704	0.0184871
SMPD3	51.2626	-0.88704	0.2458	-3.60878	0.000307635	0.00079692
LCT	63.5866	-0.887014	0.228038	-3.88976	0.000100342	0.000272636
2022-09-09	20140.7	-0.885986	0.0279829	-31.6617	5.23516e-220	4.26256e-218
ATP6V0E2	1624.55	-0.883586	0.054366	-16.2525	2.1431e-59	4.02829e-58
KLF13-2	54.3967	-0.883459	0.243656	-3.62585	0.000288015	0.000749031
LIPT2	40.1402	-0.882123	0.275255	-3.20475	0.0013518	0.00323723
LOC100996404	21.2084	-0.882092	0.361191	-2.44218	0.014599	0.0296957
ZNF71	341.751	-0.881654	0.102008	-8.64295	5.4779e-18	3.49333e-17
PIK3R3	1594.65	-0.881016	0.0503808	-17.4872	1.79507e-68	3.9386e-67
TFAP2A-AS1	81.2215	-0.881	0.202353	-4.35378	1.33808e-05	3.96826e-05
C10orf107	20.0706	-0.880944	0.36678	-2.40183	0.0163132	0.0328367
LINC00471	16.074	-0.879437	0.389968	-2.25515	0.0241236	0.0470584
TOX2	17.9737	-0.878326	0.372577	-2.35744	0.0184016	0.0367263
LOC101927775	27.6998	-0.877831	0.316143	-2.77669	0.00549158	0.0120185
EPN1	1906.26	-0.876263	0.0481997	-18.1798	7.45636e-74	1.79161e-72
RAD21-AS1	16.1883	-0.875873	0.389634	-2.24794	0.0245801	0.047824
OSBP2	214.036	-0.875815	0.126895	-6.90191	5.13086e-12	2.42699e-11
EME1	484.315	-0.875508	0.0883654	-9.90781	3.84993e-23	2.97133e-22
MIR600HG	158.102	-0.875323	0.15444	-5.66772	1.44711e-08	5.50883e-08
FAM19A2	27.9163	-0.875024	0.316258	-2.7668	0.00566091	0.0123655
RNR2	84597.7	-0.873304	0.0903225	-9.66873	4.09437e-22	3.06365e-21
SRCRB4D	40.1028	-0.873193	0.27159	-3.21511	0.00130394	0.00313048
KCTD15	311.991	-0.871799	0.108022	-8.07058	6.9963e-16	4.0717e-15
CD8B	34.2038	-0.870661	0.295824	-2.94317	0.00324872	0.00736222
PATZ1	887.823	-0.869613	0.0680832	-12.7728	2.32625e-37	2.80063e-36
MXD4	364.811	-0.86865	0.0984792	-8.82064	1.13809e-18	7.47128e-18
RUNX1	5040.11	-0.868497	0.0354667	-24.4877	1.99981e-132	9.18629e-131
GLRB	196.021	-0.868021	0.137439	-6.31566	2.69011e-10	1.14994e-09
SLC25A45	179.945	-0.866573	0.145113	-5.97171	2.3478e-09	9.46834e-09
FLJ45964	17.5339	-0.866449	0.383751	-2.25784	0.0239556	0.0467678
PARD6A	262.302	-0.866282	0.1187	-7.29805	2.91967e-13	1.48754e-12
SOX4	4214.03	-0.866085	0.0343006	-25.2499	1.13655e-140	5.59481e-139
FAM86EP	132.741	-0.864712	0.169986	-5.08696	3.63842e-07	1.24221e-06
NLN	1180.89	-0.863974	0.0641301	-13.4722	2.27995e-41	3.0061e-40
SLC25A12	566.335	-0.863405	0.0804539	-10.7317	7.2278e-27	6.36787e-26
SLC25A22	784.588	-0.862532	0.0722649	-11.9357	7.71135e-33	8.12268e-32
ACAP3	1459.87	-0.862514	0.0627848	-13.7376	6.04313e-43	8.25286e-42
LOC102724856	26.1	-0.862455	0.323275	-2.66787	0.0076334	0.0163315
SPHK2	796.93	-0.862027	0.0706331	-12.2043	2.94849e-34	3.23881e-33
BRICD5	153.638	-0.861163	0.155007	-5.55565	2.76586e-08	1.03389e-07
FAM171A2	275.1	-0.860977	0.115966	-7.42438	1.13312e-13	5.91703e-13
DNTT	312.745	-0.860915	0.105872	-8.13164	4.2352e-16	2.49523e-15
INPP5D	258.326	-0.860846	0.119241	-7.21936	5.22339e-13	2.61322e-12
FBXL12	562.973	-0.859963	0.09013	-9.54135	1.4098e-21	1.03728e-20
SH2D1A	2242.92	-0.859594	0.0446362	-19.2578	1.21444e-82	3.25494e-81
LSS	385.007	-0.859478	0.103936	-8.26928	1.34773e-16	8.13566e-16
KHDC1	111.595	-0.858009	0.176414	-4.86362	1.15258e-06	3.76987e-06
AP2A2-2	41.2911	-0.857565	0.270284	-3.17283	0.0015096	0.00358912
TMEM223	215.106	-0.85689	0.126826	-6.75644	1.41426e-11	6.53144e-11
ANO8	496.808	-0.856879	0.0867511	-9.87745	5.21421e-23	3.99912e-22
FAM203A	869.941	-0.856669	0.0672356	-12.7413	3.48493e-37	4.18094e-36
BCAT2	787.091	-0.856614	0.070977	-12.0689	1.54179e-33	1.66172e-32
PIEZO1	3455.05	-0.856361	0.0417533	-20.51	1.75262e-93	5.43501e-92
ALDH3A2	747.644	-0.85634	0.0707544	-12.103	1.01846e-33	1.10253e-32
USP20	3085.2	-0.855667	0.0407994	-20.9725	1.16889e-97	3.74655e-96
LRFN4	999.499	-0.855075	0.0631874	-13.5324	1.00737e-41	1.34264e-40
RNF157	247.586	-0.854797	0.121432	-7.03929	1.93216e-12	9.37435e-12
CDK18	397.255	-0.853801	0.0966881	-8.83047	1.04239e-18	6.86667e-18
LOC101928123	44.9445	-0.853721	0.258173	-3.30678	0.00094376	0.00230552
EPX	21.8741	-0.852746	0.347289	-2.45544	0.0140713	0.028721
CAND2	411.218	-0.852507	0.0960317	-8.87735	6.8475e-19	4.54713e-18
ANKRD20A19P	40.1579	-0.852354	0.274507	-3.10503	0.00190258	0.00446047
SLC46A3	275.175	-0.852322	0.116119	-7.34004	2.13528e-13	1.09767e-12
MAZ	12563	-0.852072	0.0271962	-31.3305	1.79167e-215	1.41197e-213
ATG4C	369.738	-0.851673	0.0987146	-8.62763	6.26349e-18	3.98544e-17
ZNF576	208.729	-0.851499	0.136214	-6.25119	4.07341e-10	1.72113e-09
CHML	1305.66	-0.851398	0.0557155	-15.2812	1.02092e-52	1.70285e-51
CREB3L4	104.602	-0.84989	0.182612	-4.65409	3.25422e-06	1.02564e-05
TIMP2	214.273	-0.849838	0.125672	-6.76234	1.35782e-11	6.28095e-11
SAT2	179.355	-0.849736	0.147777	-5.75012	8.91815e-09	3.45543e-08
LRP5	1278.44	-0.849005	0.0605006	-14.033	9.79037e-45	1.40049e-43
RAC3	290.484	-0.848214	0.109873	-7.71993	1.16397e-14	6.41341e-14
LINC00669	71.7166	-0.847913	0.21458	-3.9515	7.76642e-05	0.000213586
DEF6	2321.36	-0.84776	0.0435292	-19.4756	1.76702e-84	4.84168e-83
IMP3	1212.52	-0.847744	0.0586337	-14.4583	2.22205e-47	3.34867e-46
ZBTB47	95.9412	-0.846324	0.198939	-4.25419	2.0981e-05	6.11248e-05
SLC37A2	27.8071	-0.845974	0.312776	-2.70473	0.00683599	0.0147393
ZFP30	281.988	-0.845577	0.129964	-6.50624	7.70546e-11	3.41361e-10
ZBED4	3625.17	-0.845179	0.0394272	-21.4365	6.10941e-102	2.0743e-100
PLEKHJ1	1144.26	-0.8451	0.0617901	-13.6769	1.39431e-42	1.89063e-41
BACE1	69.3891	-0.84475	0.215087	-3.92749	8.58383e-05	0.000235162
CNNM2	145.709	-0.844551	0.15766	-5.35678	8.472e-08	3.04814e-07
OR7E14P	49.0703	-0.844451	0.255971	-3.29901	0.000970254	0.00236876
PLD6	242.396	-0.844203	0.123055	-6.86035	6.86898e-12	3.22782e-11
TTLL1	161.858	-0.844121	0.146017	-5.78099	7.42623e-09	2.90158e-08
PLCG1	4201.98	-0.843579	0.0357188	-23.6172	2.56372e-123	1.08752e-121
CNP	2159.59	-0.843062	0.0441886	-19.0787	3.79469e-81	9.95309e-80
BARHL2	80.8231	-0.842793	0.20719	-4.06772	4.74747e-05	0.000133532
VEGFB	748.486	-0.842166	0.0814561	-10.3389	4.69932e-25	3.89645e-24
PRKAG2-AS1	27.3564	-0.841777	0.316979	-2.65562	0.0079162	0.0168756
DTNBP1	753.063	-0.841268	0.070438	-11.9434	7.02954e-33	7.4136e-32
IGF1R	795.79	-0.841131	0.0733039	-11.4746	1.7704e-30	1.74101e-29
FARSA	4536.64	-0.841079	0.0378061	-22.2472	1.20123e-109	4.48632e-108
MATK	17.9859	-0.84102	0.371081	-2.26641	0.0234266	0.0458549
RND2	106.994	-0.840534	0.178827	-4.70026	2.59836e-06	8.27738e-06
RNF166	1210.1	-0.840072	0.0592628	-14.1754	1.30152e-45	1.89171e-44
SLC12A9	435.213	-0.839461	0.110193	-7.61809	2.57461e-14	1.39488e-13
LIPE	161.744	-0.839423	0.148918	-5.63682	1.73217e-08	6.55767e-08
ATP6AP1L	25.0173	-0.839012	0.333298	-2.5173	0.0118257	0.0245133
RAB3A	66.4861	-0.838384	0.217435	-3.8558	0.000115353	0.000311891
CCDC92	43.0803	-0.838274	0.261691	-3.2033	0.00135862	0.00325175
KIAA2013	906.549	-0.837748	0.0647995	-12.9283	3.11565e-38	3.82608e-37
SIVA1	3852.55	-0.837282	0.0358164	-23.377	7.31797e-121	2.9934e-119
SNHG7	807.99	-0.837136	0.0693702	-12.0677	1.56498e-33	1.68463e-32
LOC101059954	39.51	-0.837133	0.283612	-2.95168	0.00316045	0.00718114
ZNF124	317.708	-0.837081	0.10631	-7.87397	3.43565e-15	1.94159e-14
TSEN54	1181.22	-0.83678	0.0568682	-14.7144	5.21148e-49	8.10255e-48
CELSR3	2893.6	-0.83647	0.0483231	-17.31	3.95702e-67	8.50834e-66
FANCC	529.651	-0.83632	0.084636	-9.88138	5.01374e-23	3.8488e-22
KDM1A	4469.99	-0.835563	0.0328831	-25.4101	1.94899e-142	9.67734e-141
HTR2B	23.1065	-0.834627	0.345485	-2.41581	0.0157003	0.0317032
C14orf64	128.152	-0.833875	0.161272	-5.17062	2.33316e-07	8.09936e-07
ZNF250	91.4532	-0.83356	0.191835	-4.3452	1.3915e-05	4.12029e-05
PEX5	1567.67	-0.833002	0.0518605	-16.0623	4.68486e-58	8.6544e-57
BTN3A1	369.203	-0.8328	0.0986262	-8.444	3.06652e-17	1.90811e-16
TSTD3	20.1755	-0.832571	0.355462	-2.34222	0.0191692	0.0381518
COL18A1	150.781	-0.832245	0.15569	-5.34553	9.0153e-08	3.23077e-07
CAMSAP3	299.657	-0.831051	0.107358	-7.74089	9.87204e-15	5.46397e-14
ANKRD36B	86.8524	-0.830628	0.207218	-4.00847	6.1114e-05	0.000170168
TBC1D16	625.375	-0.830351	0.080903	-10.2635	1.02868e-24	8.42766e-24
BAG2	894	-0.830126	0.066025	-12.5729	2.97592e-36	3.45915e-35
CCER2	20.2256	-0.829947	0.358925	-2.31231	0.0207606	0.0410009
KIF20A	1588.68	-0.829654	0.0509449	-16.2853	1.25481e-59	2.36378e-58
SSBP3	1019.2	-0.829419	0.06264	-13.2411	5.08277e-40	6.52143e-39
HOXA5	121.341	-0.829284	0.164644	-5.03684	4.73277e-07	1.599e-06
KIAA1841	81.3884	-0.828491	0.198632	-4.17098	3.03293e-05	8.69878e-05
AVPR2	100.078	-0.82772	0.182397	-4.53801	5.67873e-06	1.74652e-05
ZNF792	100.991	-0.826606	0.182966	-4.51782	6.24797e-06	1.90895e-05
LRRC47	1805.95	-0.826364	0.047263	-17.4844	1.88441e-68	4.12937e-67
HAS3	20.3612	-0.825652	0.364686	-2.26401	0.0235736	0.0461164
FBXW8	402.813	-0.825465	0.0927319	-8.90162	5.50358e-19	3.66621e-18
KIAA1804	310.779	-0.825269	0.111108	-7.42763	1.10563e-13	5.77701e-13
AOX1	85.6465	-0.825169	0.201833	-4.08838	4.34395e-05	0.000122765
SLC27A4	864.427	-0.824971	0.0659891	-12.5016	7.31338e-36	8.42117e-35
NRN1	1248.56	-0.824924	0.0560738	-14.7114	5.44569e-49	8.45904e-48
TMEM25	184.078	-0.824695	0.135342	-6.09339	1.10542e-09	4.56517e-09
SALL2	439.098	-0.824343	0.0896145	-9.19877	3.62067e-20	2.51835e-19
CD4	1101.6	-0.823001	0.0596652	-13.7937	2.7831e-43	3.8251e-42
NFATC4	96.1269	-0.822632	0.187921	-4.37754	1.20029e-05	3.5763e-05
ENDOG	307.165	-0.82175	0.105648	-7.77817	7.35833e-15	4.10043e-14
RGS12	666.577	-0.820841	0.0764646	-10.7349	6.97837e-27	6.15128e-26
PAAF1	425.02	-0.820394	0.0916634	-8.95007	3.55255e-19	2.38037e-18
UVRAG	680.409	-0.820374	0.0755707	-10.8557	1.87317e-27	1.68135e-26
TMEM120B	567.383	-0.819635	0.0801407	-10.2275	1.49397e-24	1.21125e-23
PGPEP1	390.084	-0.818533	0.0979346	-8.35796	6.38134e-17	3.90286e-16
GALNT2	6662.56	-0.818436	0.030183	-27.1158	6.41536e-162	3.78749e-160
ACVR2B	552.64	-0.818347	0.0888456	-9.21089	3.2343e-20	2.25417e-19
RASA3	1778.42	-0.818179	0.0498097	-16.4261	1.2441e-60	2.38546e-59
KLHL32	23.3367	-0.81635	0.343115	-2.37923	0.0173489	0.0347828
PUS1	1275.25	-0.816133	0.0552906	-14.7608	2.62252e-49	4.10336e-48
BAP1	3943.5	-0.815489	0.0368718	-22.1169	2.17551e-108	8.00328e-107
TGFBRAP1	1356.2	-0.815403	0.0541073	-15.0701	2.5464e-51	4.16242e-50
EID2B	44.1707	-0.814907	0.259916	-3.13527	0.00171698	0.00404854
HSD17B6	95.0253	-0.814408	0.191004	-4.26383	2.00956e-05	5.86648e-05
MAPK12	295.143	-0.813724	0.109518	-7.43004	1.08567e-13	5.67441e-13
MPZL1	1272.64	-0.813524	0.0557723	-14.5865	3.42259e-48	5.2547e-47
CENPB	2403.76	-0.812611	0.0471743	-17.2257	1.70323e-66	3.63046e-65
EFCAB2	83.9271	-0.812117	0.199325	-4.07434	4.61441e-05	0.000130195
OPN3	142.437	-0.811931	0.156404	-5.19123	2.08905e-07	7.28434e-07
PLEKHG4B	110.266	-0.810636	0.171455	-4.72797	2.26774e-06	7.2605e-06
NPM2	25.3793	-0.810502	0.331305	-2.44639	0.0144295	0.0293858
C17orf59	195.655	-0.810382	0.131624	-6.15679	7.42339e-10	3.09473e-09
C1orf35	820.063	-0.810043	0.0714676	-11.3344	8.86217e-30	8.55349e-29
CHST10	451.405	-0.809257	0.0935143	-8.65383	4.98012e-18	3.18179e-17
TMEM110	537.772	-0.809041	0.0854422	-9.46887	2.82898e-21	2.05679e-20
FOXM1	2553.05	-0.808631	0.045285	-17.8565	2.57325e-71	5.89446e-70
LOC100288162-2	37.0415	-0.808298	0.284215	-2.84397	0.00445554	0.00990248
VAT1	8264.06	-0.808157	0.0331455	-24.3821	2.65005e-131	1.20444e-129
RAVER2	526.864	-0.808126	0.0852996	-9.47396	2.69422e-21	1.96178e-20
KIF26A	913.21	-0.806875	0.063839	-12.6392	1.28337e-36	1.51119e-35
ZNF563	68.9484	-0.806805	0.214163	-3.76725	0.000165056	0.000439773
WFS1	212.767	-0.80599	0.126129	-6.39021	1.65663e-10	7.17982e-10
GARNL3	42.4576	-0.805638	0.276748	-2.91108	0.00360177	0.00811732
WNT10B	32.0993	-0.805352	0.299205	-2.69164	0.00711018	0.0152889
TCHP	1006.76	-0.805321	0.0633049	-12.7213	4.50251e-37	5.37921e-36
MEX3A	200.846	-0.804705	0.130553	-6.16383	7.10072e-10	2.96381e-09
TSPAN15	149.336	-0.803766	0.154411	-5.20537	1.9361e-07	6.77161e-07
ANKS6	897.4	-0.803615	0.0701393	-11.4574	2.15862e-30	2.11552e-29
CHAT	21.1312	-0.803611	0.356426	-2.25463	0.0241563	0.0471115
KRT1	93.7072	-0.802793	0.188829	-4.25143	2.12414e-05	6.18311e-05
PLOD1	586.887	-0.802177	0.0870708	-9.21293	3.17349e-20	2.21268e-19
ICMT	2375.75	-0.801197	0.0445803	-17.972	3.22892e-72	7.5576e-71
ZGPAT	896.978	-0.800835	0.0665892	-12.0265	2.57847e-33	2.75829e-32
USP43	78.9823	-0.80055	0.204408	-3.91644	8.98669e-05	0.00024569
ZNF462	475.378	-0.80007	0.0874992	-9.14374	6.03303e-20	4.15754e-19
STAU2	1847.11	-0.799095	0.0490524	-16.2906	1.15052e-59	2.1697e-58
SLC39A3	986.857	-0.798944	0.0660926	-12.0882	1.21857e-33	1.31833e-32
HES7	28.797	-0.798886	0.315052	-2.53573	0.0112214	0.0233649
EMB	1867.85	-0.798613	0.0547193	-14.5947	3.0344e-48	4.67123e-47
SLC11A2	784.664	-0.798519	0.0692546	-11.5302	9.29388e-31	9.2401e-30
PRADC1	569.183	-0.798234	0.0874227	-9.13074	6.80333e-20	4.67525e-19
ZNF32	388.696	-0.797723	0.105111	-7.58937	3.2147e-14	1.73239e-13
CCBL1	180.773	-0.797349	0.142935	-5.5784	2.42741e-08	9.09749e-08
CASP6	354.069	-0.79732	0.0985874	-8.08745	6.09292e-16	3.55558e-15
RP5-1103G7.4	29.9898	-0.796658	0.307701	-2.58906	0.00962372	0.0202372
ARHGEF6	4499.06	-0.796597	0.0347089	-22.9508	1.44614e-116	5.77782e-115
TONSL	2185.24	-0.796302	0.0451122	-17.6516	9.89372e-70	2.2132e-68
LOC729887	29.3417	-0.795099	0.309413	-2.5697	0.0101786	0.0213446
CEP68	389.686	-0.79472	0.0945393	-8.40624	4.23375e-17	2.60889e-16
BRCC3	915.272	-0.793605	0.0635636	-12.4852	8.99078e-36	1.0325e-34
RIMKLA	408.895	-0.792608	0.0931973	-8.50462	1.82187e-17	1.14483e-16
2022-09-06	534.528	-0.791059	0.0854157	-9.26128	2.01992e-20	1.41931e-19
DHRS4L2	434.805	-0.790675	0.0936316	-8.44453	3.05264e-17	1.90016e-16
TFAP2C	164.182	-0.78964	0.145591	-5.42367	5.83876e-08	2.12927e-07
SIPA1	810.361	-0.789515	0.0711864	-11.0908	1.39005e-28	1.29367e-27
SUMO3	3151.52	-0.787463	0.0397602	-19.8053	2.67898e-87	7.62001e-86
FAT1	4111.82	-0.787455	0.100895	-7.8047	5.96443e-15	3.34538e-14
MRGBP	987.228	-0.787448	0.0621066	-12.679	7.73342e-37	9.15645e-36
PLCB2	254.646	-0.786624	0.120979	-6.50218	7.91643e-11	3.50436e-10
TPCN1	342.58	-0.7851	0.101088	-7.76652	8.06733e-15	4.48388e-14
BAI2	228.646	-0.783504	0.123505	-6.34393	2.23975e-10	9.61493e-10
NUDT3	203.816	-0.78331	0.135639	-5.77494	7.69814e-09	3.00236e-08
RFXAP	330.02	-0.78315	0.105812	-7.40136	1.34797e-13	7.00699e-13
KIAA0319	120.287	-0.783142	0.168548	-4.64641	3.37755e-06	1.06217e-05
KIAA1211	83.1836	-0.783077	0.219929	-3.56059	0.000370025	0.00095037
DDX28	817.062	-0.782746	0.0690492	-11.3361	8.6972e-30	8.39898e-29
D2HGDH	321.398	-0.781938	0.104348	-7.4936	6.70121e-14	3.55439e-13
SPATA33	278.175	-0.781516	0.111665	-6.99876	2.58241e-12	1.24239e-11
PHKA1	552.819	-0.781405	0.0822418	-9.50131	2.07261e-21	1.5165e-20
ANXA11	1121.4	-0.781347	0.0629145	-12.4192	2.0564e-35	2.33811e-34
TRIM3	138.951	-0.781145	0.155003	-5.03953	4.66665e-07	1.57821e-06
USP44	1052.75	-0.781137	0.0625403	-12.4901	8.45085e-36	9.71791e-35
HOXD8	81.7126	-0.780837	0.196035	-3.98315	6.80069e-05	0.000188475
C6orf89	2096.52	-0.780587	0.0460987	-16.933	2.5715e-64	5.2344e-63
TMEM173	383.064	-0.78047	0.0985797	-7.91714	2.43027e-15	1.38206e-14
RBM43	170.838	-0.780402	0.142304	-5.48406	4.15684e-08	1.53448e-07
TBC1D24	424.759	-0.779994	0.0919685	-8.4811	2.23083e-17	1.3962e-16
SLC6A15	155.394	-0.779893	0.148024	-5.26868	1.37407e-07	4.8603e-07
SCAMP5	226.648	-0.778436	0.126265	-6.16511	7.04327e-10	2.94054e-09
PADI2	112.805	-0.778252	0.169165	-4.60055	4.21383e-06	1.31338e-05
PSAT1	5451.82	-0.778069	0.0347394	-22.3973	4.1792e-111	1.57453e-109
TJP3	36.3213	-0.777166	0.282423	-2.75178	0.00592715	0.0129044
CMIP	1134.09	-0.777154	0.0661003	-11.7572	6.48507e-32	6.64759e-31
HEYL	194.867	-0.77658	0.133814	-5.80344	6.49671e-09	2.54651e-08
KTN1-AS1	33.2389	-0.776388	0.295305	-2.62911	0.00856084	0.0181675
NCBP2-AS2	357.684	-0.776196	0.104916	-7.39826	1.37982e-13	7.17041e-13
PXDN	2851.59	-0.776088	0.0427029	-18.1741	8.27474e-74	1.98271e-72
FGD6	195.123	-0.775738	0.138926	-5.58382	2.35295e-08	8.82806e-08
TXNRD3	205.404	-0.775332	0.13028	-5.95125	2.66101e-09	1.07089e-08
GPR176	124.318	-0.775245	0.170199	-4.55494	5.2401e-06	1.61828e-05
HEXIM2	76.5204	-0.774738	0.20334	-3.81006	0.000138935	0.000372779
MAP1A	2199.76	-0.774216	0.0578365	-13.3863	7.27223e-41	9.52263e-40
DEGS2	23.3329	-0.77353	0.339412	-2.27903	0.0226654	0.0444816
SHMT1	1378.79	-0.772915	0.0543643	-14.2173	7.15324e-46	1.05036e-44
SIPA1L3	287.191	-0.772573	0.11146	-6.93138	4.16762e-12	1.98036e-11
FLRT1	25.3631	-0.772517	0.329188	-2.34673	0.0189387	0.0377107
PRMT7	682.389	-0.772115	0.0746133	-10.3482	4.26369e-25	3.53866e-24
RAB6B	117.95	-0.772098	0.166894	-4.62628	3.72301e-06	1.16654e-05
ORC1	1012.93	-0.77181	0.0618154	-12.4857	8.93279e-36	1.02652e-34
DLX3	96.1877	-0.771764	0.185367	-4.16344	3.13495e-05	8.9794e-05
POMT1	1126.77	-0.771487	0.0623883	-12.3659	3.99765e-35	4.49475e-34
RNF144A	444.925	-0.770317	0.0891457	-8.6411	5.56754e-18	3.54918e-17
ATG13	3531.69	-0.769728	0.0368869	-20.8672	1.0635e-96	3.38977e-95
DNMT3B	130.261	-0.769662	0.163342	-4.71196	2.45351e-06	7.82898e-06
CHCHD4	640.395	-0.769088	0.0777358	-9.8936	4.43763e-23	3.41723e-22
CLPTM1L	1309.68	-0.769083	0.0594785	-12.9304	3.03067e-38	3.72705e-37
MVK	174.237	-0.76888	0.139075	-5.52853	3.22932e-08	1.19904e-07
C22orf29	785.74	-0.76798	0.0706155	-10.8755	1.50795e-27	1.35779e-26
MAP4K1	1294.08	-0.767774	0.0567523	-13.5285	1.06151e-41	1.41261e-40
PTGES2	1015.4	-0.767557	0.0651997	-11.7724	5.41604e-32	5.56505e-31
EFCAB4A	87.2565	-0.767362	0.193724	-3.9611	7.46037e-05	0.000205597
SRD5A1	206.9	-0.76675	0.13142	-5.83434	5.40044e-09	2.12651e-08
LOC283683	53.6672	-0.765966	0.240231	-3.18846	0.00143034	0.00341295
MPST	714.028	-0.765325	0.0735575	-10.4044	2.36639e-25	1.97832e-24
RHOH	1414.08	-0.764798	0.0532571	-14.3605	9.15534e-47	1.37131e-45
ZNF74	533.286	-0.764495	0.0862629	-8.86239	7.83179e-19	5.18697e-18
B3GNT9	29.0148	-0.76354	0.307051	-2.48669	0.0128939	0.0265354
REEP6	103.105	-0.763195	0.180118	-4.2372	2.26324e-05	6.56686e-05
NPEPL1	30.1492	-0.762836	0.307876	-2.47774	0.0132217	0.0271321
ZKSCAN2	430.108	-0.762595	0.0925491	-8.2399	1.72356e-16	1.03679e-15
MAFG-AS1	144.108	-0.762316	0.161133	-4.73097	2.23445e-06	7.15658e-06
RPGRIP1	31.6846	-0.762034	0.303304	-2.51245	0.0119897	0.0248203
XRCC3	1182.57	-0.761546	0.0579645	-13.1381	1.99074e-39	2.51293e-38
SLC19A1	1792.09	-0.760941	0.0493981	-15.4043	1.5324e-53	2.59121e-52
TMEM104	434.091	-0.760466	0.0987086	-7.70415	1.31717e-14	7.23897e-14
CD320	1210.64	-0.76007	0.0582495	-13.0485	6.47847e-39	8.07694e-38
MYT1L	35.2049	-0.759417	0.290262	-2.61632	0.00888843	0.0188012
LOC440311	45.434	-0.758786	0.262052	-2.89556	0.00378489	0.00849547
HOXA3	35.6067	-0.758432	0.296642	-2.55672	0.0105663	0.0221
CCDC136	276.511	-0.757865	0.116929	-6.48142	9.08648e-11	4.00374e-10
FAM35A	827.291	-0.757848	0.0674173	-11.2412	2.56e-29	2.43526e-28
COA7	649.26	-0.75783	0.0770796	-9.83179	8.21479e-23	6.26409e-22
HSPA2	43.9669	-0.757756	0.271209	-2.794	0.00520612	0.0114419
ADA	18971.8	-0.757747	0.0240189	-31.548	1.9109e-218	1.52694e-216
SUV420H2	264.815	-0.757065	0.113364	-6.67819	2.41909e-11	1.10473e-10
C5	132.751	-0.756806	0.162103	-4.66867	3.03157e-06	9.58984e-06
TSR3	1297.29	-0.756318	0.0540566	-13.9912	1.76363e-44	2.49787e-43
TREX2	53.616	-0.75629	0.242031	-3.12477	0.00177945	0.00418722
MCM4	8516.57	-0.756019	0.0295295	-25.6021	1.44432e-144	7.34124e-143
BUB1B	2626.03	-0.755843	0.0429002	-17.6186	1.77272e-69	3.9501e-68
DAB2	108.1	-0.75532	0.174538	-4.32754	1.50785e-05	4.45187e-05
CD47	5731.27	-0.754723	0.0380193	-19.851	1.07999e-87	3.10272e-86
E2F7	1240.86	-0.754007	0.0601708	-12.5311	5.04528e-36	5.82905e-35
ZMYND10	75.1924	-0.753915	0.210007	-3.58996	0.000330734	0.000854052
COG4	857.914	-0.753589	0.0651901	-11.5599	6.57991e-31	6.57226e-30
USP1	7080.44	-0.753045	0.0350682	-21.4737	2.73997e-102	9.3584e-101
NAGA	472.352	-0.752755	0.0887792	-8.47895	2.27231e-17	1.42164e-16
PNKD	421.353	-0.752712	0.099005	-7.60276	2.89879e-14	1.56559e-13
POLG2	252.251	-0.752563	0.119715	-6.28627	3.25178e-10	1.38076e-09
LRRC61	521.042	-0.751083	0.0946672	-7.93393	2.12313e-15	1.2114e-14
SLC25A43	180.162	-0.750716	0.138322	-5.42731	5.72113e-08	2.09036e-07
HAR1A	87.2088	-0.750434	0.19116	-3.92568	8.64835e-05	0.000236779
NXPH4	61.3762	-0.750183	0.234434	-3.19997	0.00137442	0.00328775
CYP2S1	112.936	-0.749852	0.171892	-4.36234	1.28681e-05	3.82218e-05
RMI1	1130.21	-0.749629	0.0591521	-12.6729	8.35549e-37	9.88618e-36
SCARB1	789.004	-0.749581	0.072122	-10.3932	2.66166e-25	2.22085e-24
MINK1	795.727	-0.749265	0.0749246	-10.0003	1.52006e-23	1.18973e-22
CECR1	457.377	-0.748	0.0893116	-8.37517	5.51426e-17	3.38097e-16
LTBP1	115.48	-0.747431	0.167271	-4.46838	7.88139e-06	2.38049e-05
BTBD6	1238.87	-0.747099	0.0561964	-13.2944	2.49409e-40	3.22654e-39
CASP1	47.3154	-0.746464	0.259328	-2.87845	0.00399631	0.00894199
CPLX1	315.672	-0.745459	0.107234	-6.9517	3.60923e-12	1.72001e-11
MGAT3	77.1932	-0.745364	0.2026	-3.67899	0.000234164	0.000614658
NUP210	8755.63	-0.7446	0.0317138	-23.4787	6.73246e-122	2.79381e-120
CADM2	38.3473	-0.744497	0.278909	-2.66932	0.00760059	0.0162694
BUB1	4745.83	-0.744186	0.0379961	-19.5859	2.04127e-85	5.6838e-84
ANKRD9	91.8722	-0.743722	0.198326	-3.74999	0.000176842	0.000469648
ELOVL1	882.811	-0.74356	0.0673874	-11.0341	2.61651e-28	2.41157e-27
SLC29A2	117.272	-0.743197	0.167596	-4.43447	9.23007e-06	2.7737e-05
ACPL2	406.591	-0.743168	0.099166	-7.49418	6.67147e-14	3.53971e-13
TM7SF3	2678.22	-0.743068	0.0454247	-16.3582	3.80049e-60	7.24667e-59
HDAC4	1717.6	-0.742653	0.0501805	-14.7997	1.47247e-49	2.31657e-48
NUDCD3	925.205	-0.742491	0.0645955	-11.4945	1.40657e-30	1.38719e-29
PROB1	178.777	-0.742464	0.139808	-5.31059	1.0927e-07	3.88829e-07
GYLTL1B	105.992	-0.742234	0.186281	-3.98449	6.76244e-05	0.000187445
MX1	88.9871	-0.741728	0.193607	-3.8311	0.000127574	0.000343422
LOC102723959	52.9841	-0.741699	0.250809	-2.95722	0.00310426	0.00706654
LINC00883	59.6508	-0.741649	0.228571	-3.24471	0.00117568	0.00284162
WDR81	86.3757	-0.740288	0.210447	-3.5177	0.000435311	0.00110959
MPV17L2	472.01	-0.740162	0.0879704	-8.41376	3.97074e-17	2.45386e-16
LONRF3	167.17	-0.74009	0.148969	-4.96807	6.7623e-07	2.25497e-06
AKAP1	1388.63	-0.739887	0.0524345	-14.1107	3.26357e-45	4.70371e-44
DPH5	349.458	-0.739597	0.100244	-7.37798	1.60711e-13	8.32636e-13
SMIM14	84.0132	-0.739544	0.201769	-3.6653	0.000247052	0.000646906
ZC4H2	459.9	-0.739364	0.0875059	-8.4493	2.93049e-17	1.82545e-16
TXLNG2P	1052.37	-0.739057	0.0655529	-11.2742	1.75963e-29	1.68696e-28
PHF21A	494.529	-0.738189	0.0902521	-8.17918	2.85777e-16	1.70119e-15
TREX1	334.89	-0.737601	0.104234	-7.07637	1.4798e-12	7.21832e-12
PCYOX1L	408.662	-0.737573	0.0931425	-7.91875	2.39901e-15	1.36474e-14
OCEL1	97.1361	-0.7373	0.185247	-3.98009	6.88882e-05	0.000190795
ROGDI	134.624	-0.737232	0.155655	-4.73631	2.17645e-06	6.98252e-06
DKFZP586I1420	133.045	-0.736795	0.159342	-4.62399	3.76433e-06	1.17906e-05
EPB41L1	358.301	-0.7367	0.0989496	-7.4452	9.67954e-14	5.0742e-13
SUFU	388.516	-0.736632	0.095562	-7.70843	1.2738e-14	7.00956e-14
KLHDC8B	173.469	-0.736424	0.144116	-5.10992	3.22289e-07	1.10716e-06
LEF1	9814.3	-0.736372	0.0310098	-23.7464	1.19651e-124	5.15189e-123
TCF3	6195.6	-0.735662	0.0379378	-19.3913	9.14436e-84	2.47402e-82
BRI3BP	683.765	-0.735124	0.0732426	-10.0368	1.04988e-23	8.25868e-23
JDP2	63.0558	-0.734753	0.229637	-3.19963	0.00137602	0.00329111
PTPMT1	323.813	-0.734681	0.103667	-7.08692	1.37127e-12	6.70989e-12
TPRN	459.314	-0.734622	0.0992464	-7.402	1.34149e-13	6.97543e-13
DTL	2696.02	-0.733062	0.0407939	-17.9699	3.353e-72	7.83736e-71
CEP128	202.485	-0.732027	0.132104	-5.54131	3.00219e-08	1.11882e-07
ZNF777	715.487	-0.731438	0.0714876	-10.2317	1.43021e-24	1.16066e-23
TRAM2-AS1	64.9853	-0.731095	0.221091	-3.30676	0.000943813	0.00230552
CTSC	1651.94	-0.730666	0.0527514	-13.8511	1.25257e-43	1.73262e-42
MFAP4	36.9659	-0.730462	0.3223	-2.26641	0.0234265	0.0458549
C20orf27	1118	-0.730269	0.0604874	-12.0731	1.46564e-33	1.58164e-32
ACSS2	115.171	-0.730194	0.170026	-4.29459	1.75017e-05	5.13543e-05
LTBP3	235.516	-0.730002	0.123099	-5.9302	3.02565e-09	1.21365e-08
MCF2L	79.0385	-0.729828	0.202265	-3.60828	0.000308233	0.000798227
RHPN1-AS1	76.585	-0.729481	0.215047	-3.39219	0.000693353	0.00172435
KIF6	53.4027	-0.729179	0.241913	-3.01422	0.00257639	0.00593408
XKR8	222.747	-0.728949	0.124273	-5.8657	4.4723e-09	1.77241e-08
CENPM	791.058	-0.728946	0.0702201	-10.3809	3.02975e-25	2.52307e-24
FAM81A	37.5748	-0.728718	0.282297	-2.58139	0.00984034	0.0206747
LGALS9	550.782	-0.728601	0.0805883	-9.04102	1.55211e-19	1.05271e-18
FAM57A	298.283	-0.727831	0.107301	-6.7831	1.17628e-11	5.45436e-11
MAPK14	2438.61	-0.727703	0.0430855	-16.8898	5.35248e-64	1.0831e-62
CSRP2BP	392.965	-0.727649	0.0950893	-7.65227	1.97461e-14	1.07558e-13
CAMK2G	960.675	-0.727224	0.0637475	-11.4079	3.81912e-30	3.72164e-29
TDRP	44.9147	-0.727092	0.263501	-2.75935	0.00579162	0.0126285
PRSS53	196.278	-0.726768	0.132594	-5.48115	4.22572e-08	1.55923e-07
ARHGAP4	1634.65	-0.726679	0.0550612	-13.1977	9.05051e-40	1.15091e-38
ARHGAP39	120.939	-0.725813	0.175476	-4.13625	3.53032e-05	0.000100699
C5orf55	81.131	-0.725684	0.197445	-3.67538	0.000237497	0.000622931
SV2A	711.626	-0.725668	0.0720416	-10.0729	7.27958e-24	5.76328e-23
FASN	5147.27	-0.725453	0.0393589	-18.4317	7.31155e-76	1.7996e-74
TRAPPC9	644.764	-0.725388	0.082772	-8.76369	1.88964e-18	1.23156e-17
TCF19	63.7824	-0.72472	0.224891	-3.22254	0.0012706	0.00305642
HESX1	27.3113	-0.724519	0.320888	-2.25786	0.0239546	0.0467678
ZC3H12B	82.0034	-0.723986	0.198409	-3.64896	0.000263306	0.000687267
FRAT2	205.332	-0.723928	0.131903	-5.48831	4.05789e-08	1.49859e-07
TANC2	592.487	-0.72391	0.0948168	-7.63483	2.26119e-14	1.22857e-13
PLK1	3174.47	-0.72375	0.0402311	-17.9898	2.34117e-72	5.49471e-71
DNM3	118.377	-0.723448	0.165236	-4.37826	1.19631e-05	3.56514e-05
TTC30A	220.872	-0.723276	0.125313	-5.77174	7.84578e-09	3.05786e-08
HSF1	1899.8	-0.723075	0.0530398	-13.6327	2.55945e-42	3.45686e-41
CACNB3	610.861	-0.72299	0.0776031	-9.31651	1.20233e-20	8.50394e-20
EVI5L	223.796	-0.722933	0.124877	-5.78915	7.07431e-09	2.76849e-08
TCEAL1	150.865	-0.7229	0.153872	-4.69806	2.6264e-06	8.36049e-06
LRRC27	81.2665	-0.722864	0.205218	-3.52242	0.00042762	0.00109096
LOC100506634	74.0882	-0.722816	0.207837	-3.47781	0.000505532	0.00127815
KLHL35	130.749	-0.721679	0.161486	-4.46898	7.85947e-06	2.37486e-05
DHODH	305.723	-0.721424	0.106717	-6.76018	1.37823e-11	6.37021e-11
PRRT3	172.275	-0.72139	0.140013	-5.15231	2.57302e-07	8.90142e-07
KATNAL2	95.7405	-0.720792	0.195365	-3.68946	0.000224734	0.00059108
LDB1	1289.36	-0.72065	0.0575725	-12.5172	6.00824e-36	6.92298e-35
SURF6	1629.25	-0.719565	0.0543483	-13.2399	5.1636e-40	6.61525e-39
HEBP1	344.991	-0.719461	0.10172	-7.07292	1.51703e-12	7.39576e-12
F8A1	105.437	-0.719367	0.184361	-3.90195	9.54194e-05	0.000260207
FBXO32	83.0129	-0.719039	0.195452	-3.67886	0.00023428	0.000614868
HARBI1	85.5094	-0.718896	0.194609	-3.69406	0.000220701	0.000581096
TMEM218	260.461	-0.7187	0.113649	-6.32385	2.55132e-10	1.09197e-09
H1FX	4396.63	-0.718505	0.0390602	-18.3948	1.4451e-75	3.53659e-74
UNC13D	1403.94	-0.718215	0.0601029	-11.9498	6.51169e-33	6.8759e-32
PKD1	1697.74	-0.718189	0.0550599	-13.0438	6.89682e-39	8.58604e-38
POLG	3729.32	-0.717966	0.0397957	-18.0413	9.23517e-73	2.1854e-71
EPB41	1849.33	-0.717378	0.0503158	-14.2575	4.02582e-46	5.93678e-45
SORBS3	1142.92	-0.717356	0.0604995	-11.8572	1.97412e-32	2.06048e-31
THAP7-AS1	31.5809	-0.717008	0.302659	-2.36903	0.0178346	0.0356942
LOC100130987	45.0019	-0.716024	0.256234	-2.79442	0.00519935	0.011431
COMT	1367.77	-0.715663	0.0584291	-12.2484	1.71336e-34	1.89296e-33
CHST14	383.714	-0.715544	0.0991245	-7.21864	5.25089e-13	2.62621e-12
ZMYND19	1001.99	-0.715293	0.0613611	-11.6571	2.11083e-31	2.13569e-30
MYO1G	2809.73	-0.715128	0.0412407	-17.3403	2.33403e-67	5.0502e-66
BOLA1	510.321	-0.71496	0.0835527	-8.55699	1.1585e-17	7.32807e-17
TAZ	671.968	-0.714462	0.0743402	-9.6107	7.2055e-22	5.34502e-21
USP18	161.043	-0.714352	0.145821	-4.89883	9.64077e-07	3.17174e-06
CTHRC1	99.9488	-0.713838	0.18279	-3.90523	9.41376e-05	0.000256834
TMEM186	217.185	-0.713684	0.128651	-5.54743	2.89897e-08	1.08129e-07
COASY	1580.25	-0.713649	0.0499098	-14.2988	2.22692e-46	3.29815e-45
RGS18	189.838	-0.713628	0.14199	-5.02591	5.01063e-07	1.69088e-06
GTPBP3	792.827	-0.712645	0.0691786	-10.3015	6.93563e-25	5.70935e-24
MYH10	2924.31	-0.711794	0.0464458	-15.3253	5.18523e-53	8.70795e-52
BCR	2848.53	-0.711773	0.0405002	-17.5746	3.85909e-69	8.57686e-68
ABHD8	413.844	-0.711542	0.0984095	-7.23043	4.81476e-13	2.4137e-12
KLHL23	55.2166	-0.711535	0.239151	-2.97525	0.00292753	0.00668727
SPTA1	29.9242	-0.711041	0.30473	-2.33335	0.0196299	0.0389965
NBEAL2	3935.62	-0.711013	0.0423311	-16.7965	2.58975e-63	5.15549e-62
LONRF2	324.7	-0.710553	0.107069	-6.63642	3.21393e-11	1.45533e-10
SLC35B2	721.206	-0.710487	0.0741786	-9.57806	9.8886e-22	7.30065e-21
MAP7	67.9898	-0.710465	0.217235	-3.27049	0.0010736	0.0026081
FAM86JP	49.3193	-0.710133	0.246259	-2.88369	0.0039305	0.00880505
EIF4EBP1	512.62	-0.709543	0.0850158	-8.34602	7.0604e-17	4.30745e-16
EPHX2	1359.78	-0.709004	0.0587637	-12.0653	1.60985e-33	1.73183e-32
SPOCD1	64.2895	-0.708211	0.218263	-3.24477	0.00117546	0.00284149
FHL1	633.393	-0.707743	0.0761198	-9.29775	1.43452e-20	1.0117e-19
SPC24	261.126	-0.707661	0.116379	-6.08066	1.19692e-09	4.9253e-09
STC2	478.139	-0.707069	0.0881956	-8.01705	1.08313e-15	6.2591e-15
USP7	12198.4	-0.706921	0.0274005	-25.7996	8.95733e-147	4.72046e-145
TRIM58	282.88	-0.706392	0.119346	-5.91883	3.24233e-09	1.29784e-08
GNAO1	56.0393	-0.706367	0.241458	-2.92542	0.00343989	0.00776984
MOB3A	1252.92	-0.7063	0.0627569	-11.2545	2.19974e-29	2.10069e-28
DTD2	306.993	-0.705761	0.110868	-6.36578	1.94304e-10	8.38307e-10
SIRT3	217.31	-0.70571	0.125678	-5.6152	1.96331e-08	7.41147e-08
POP7	760.367	-0.704643	0.0736662	-9.56534	1.11831e-21	8.24928e-21
GALNT12	568.381	-0.704641	0.0817565	-8.61877	6.76768e-18	4.30306e-17
ILF3-AS1	304.347	-0.704369	0.108665	-6.48201	9.05063e-11	3.98999e-10
KDM4C	806.657	-0.703973	0.0681455	-10.3305	5.13185e-25	4.24484e-24
MYBBP1A	3321.87	-0.703882	0.0378603	-18.5916	3.76061e-77	9.40425e-76
PLCD1	115.309	-0.703797	0.16858	-4.17485	2.98185e-05	8.55942e-05
HTT	2325.13	-0.70373	0.0480464	-14.6469	1.41049e-48	2.18308e-47
AKAP6	55.5637	-0.703442	0.241855	-2.90853	0.00363135	0.00817864
GNAQ	4273.66	-0.701506	0.0368625	-19.0303	9.56292e-81	2.49682e-79
GCSHP3	84.6222	-0.701433	0.196335	-3.57264	0.000353402	0.000909359
TMEM42	105.503	-0.70107	0.186892	-3.75121	0.00017598	0.00046743
GLOD4	1867.37	-0.700921	0.0494429	-14.1764	1.28315e-45	1.86976e-44
RAD17-2	28.9599	-0.70022	0.305609	-2.29123	0.0219501	0.0431912
GATA2	80.7506	-0.700153	0.201111	-3.48142	0.00049876	0.00126214
SLC8B1	873.935	-0.699512	0.0699202	-10.0044	1.45724e-23	1.14213e-22
C9orf78	5374.17	-0.699356	0.0320011	-21.8542	7.09611e-106	2.52928e-104
LOC101928000	234.524	-0.699291	0.121555	-5.75285	8.77488e-09	3.40299e-08
ZNF438	150.12	-0.699225	0.154097	-4.53755	5.6912e-06	1.75004e-05
TRNE	666.43	-0.698803	0.17163	-4.07157	4.66973e-05	0.00013154
DNASE2	537.182	-0.698716	0.0826283	-8.45614	2.76382e-17	1.72412e-16
UBAC1	795.743	-0.698612	0.0697361	-10.0179	1.2713e-23	9.97302e-23
C4orf27	1460.42	-0.698378	0.0527292	-13.2446	4.84839e-40	6.22536e-39
ELAC2	2751.9	-0.698202	0.0416499	-16.7636	4.5041e-63	8.9148e-62
VPS13C	2537.95	-0.697707	0.108737	-6.41649	1.39452e-10	6.07911e-10
NIPSNAP1	1663.75	-0.697466	0.0491269	-14.1972	9.53023e-46	1.39344e-44
GMDS-AS1	29.9741	-0.6968	0.31209	-2.23269	0.0255695	0.0495638
FUT11	126.963	-0.696372	0.171899	-4.05104	5.09898e-05	0.000143068
ARID3A	348.729	-0.696282	0.0989813	-7.03448	2.00012e-12	9.69856e-12
PPP1R3D	86.6108	-0.695894	0.192215	-3.62039	0.000294154	0.000763725
ESPN	92.8099	-0.695762	0.185641	-3.7479	0.000178322	0.000473357
PLAGL1	250.796	-0.695754	0.11702	-5.94561	2.75433e-09	1.1074e-08
GREB1	124.033	-0.695723	0.163597	-4.25266	2.11242e-05	6.15109e-05
PCIF1	1192.13	-0.695558	0.0580417	-11.9838	4.32239e-33	4.58669e-32
VPS37D	76.6921	-0.695231	0.205549	-3.38232	0.000718762	0.00178418
EPOR	153.777	-0.695184	0.149041	-4.66437	3.0957e-06	9.78189e-06
NOS3	201.808	-0.694998	0.137285	-5.06246	4.13885e-07	1.40497e-06
ZFP41	166.084	-0.69481	0.146853	-4.73134	2.2304e-06	7.14759e-06
LOC102723510	45.7084	-0.694583	0.264353	-2.62749	0.00860181	0.0182488
DYNC1H1	2695.48	-0.694402	0.141581	-4.90462	9.36065e-07	3.08668e-06
GIMAP5	35.4254	-0.694047	0.285083	-2.43454	0.0149107	0.0302582
EMBP1	51.9033	-0.693652	0.25382	-2.73285	0.00627895	0.0136014
PSIP1	2579.3	-0.69273	0.0411259	-16.8441	1.15828e-63	2.31926e-62
PPM1E	196.687	-0.692525	0.135736	-5.10201	3.36068e-07	1.15289e-06
MNS1	56.7735	-0.692328	0.233822	-2.96092	0.00306721	0.00698867
THOP1	2282.03	-0.692222	0.0452196	-15.308	6.75961e-53	1.13298e-51
ARHGDIA	8371.65	-0.692165	0.0320873	-21.5713	3.33999e-103	1.16392e-101
ZNF516	93.3633	-0.691366	0.189127	-3.65556	0.000256622	0.000670739
MXI1	260.573	-0.690122	0.113506	-6.08007	1.20129e-09	4.94207e-09
SOX1	61.8912	-0.689708	0.23352	-2.95353	0.00314162	0.00713966
HSPA4L	660.327	-0.689467	0.0735102	-9.37921	6.64671e-21	4.75398e-20
PNMAL1	383.697	-0.689167	0.0981533	-7.02133	2.19759e-12	1.06112e-11
ETS1	7469.21	-0.688711	0.031632	-21.7726	4.22127e-105	1.49529e-103
LETM1	3071.23	-0.688241	0.0378142	-18.2006	5.10489e-74	1.23004e-72
HOOK2	258.515	-0.687674	0.119066	-5.77556	7.66956e-09	2.9919e-08
GJD3	117.612	-0.687136	0.165563	-4.1503	3.32046e-05	9.48862e-05
PRKAR2B	691.708	-0.686608	0.0743591	-9.23368	2.61488e-20	1.82989e-19
FKBP7	238.936	-0.686254	0.122246	-5.61372	1.98026e-08	7.47382e-08
CAMKMT	100.203	-0.685669	0.185349	-3.69934	0.000216164	0.000569412
RPUSD2	479.36	-0.68522	0.0869925	-7.87677	3.35961e-15	1.89987e-14
TRNW	124.976	-0.685092	0.1682	-4.07307	4.6398e-05	0.000130796
CEP70	1235.47	-0.685019	0.059748	-11.4651	1.97451e-30	1.93951e-29
SRPK2	1359.75	-0.684477	0.0595152	-11.5009	1.30571e-30	1.28994e-29
TMEM229B	148.98	-0.683774	0.156724	-4.36292	1.28339e-05	3.81266e-05
TTC30B	136.976	-0.682607	0.159407	-4.28218	1.85074e-05	5.42128e-05
TTLL9	35.8654	-0.682325	0.283869	-2.40366	0.0162317	0.0326841
CCDC88A	4141.28	-0.681902	0.0347937	-19.5984	1.59511e-85	4.44869e-84
C21orf58	620.828	-0.681857	0.0780206	-8.73946	2.34238e-18	1.51971e-17
ITGB3	266.889	-0.681502	0.114021	-5.97699	2.27303e-09	9.17975e-09
PLEKHA7	434.579	-0.679991	0.0926796	-7.33701	2.18412e-13	1.1221e-12
KLHL17	1686.65	-0.67989	0.110318	-6.16297	7.1392e-10	2.97915e-09
DGKZ	2367.83	-0.679841	0.0517869	-13.1277	2.28618e-39	2.87741e-38
ENGASE	500.417	-0.679806	0.0913276	-7.44359	9.79817e-14	5.13366e-13
NUBP2	1286.96	-0.679798	0.054645	-12.4403	1.5799e-35	1.8035e-34
MRI1	363.101	-0.679273	0.0991994	-6.84755	7.51254e-12	3.52356e-11
ZDHHC8	787.992	-0.679267	0.0847621	-8.0138	1.11218e-15	6.42262e-15
CENPI	366.705	-0.678953	0.100487	-6.7566	1.41265e-11	6.52575e-11
FXN	328.316	-0.678892	0.105134	-6.45738	1.06532e-10	4.67727e-10
TELO2	1931.65	-0.678764	0.052194	-13.0046	1.15161e-38	1.4254e-37
TMEM164	705.414	-0.678592	0.0725719	-9.35062	8.71387e-21	6.19893e-20
LZTS2	461.354	-0.678488	0.0939148	-7.2245	5.02946e-13	2.5184e-12
CDK5R1	175.079	-0.678187	0.138466	-4.89784	9.68941e-07	3.18713e-06
FAM63A	77.7416	-0.677884	0.202934	-3.34041	0.000836539	0.00205752
SPIN4	355.603	-0.677285	0.104633	-6.47296	9.60986e-11	4.22785e-10
SNN	379.63	-0.677072	0.0982699	-6.88992	5.58246e-12	2.63408e-11
PUS7	839.845	-0.67672	0.0667939	-10.1315	4.00603e-24	3.20408e-23
AVPI1	53.1572	-0.676575	0.249509	-2.71162	0.0066955	0.0144527
TTK	1843.47	-0.676124	0.0490695	-13.7789	3.41427e-43	4.68882e-42
ZNF862	504.806	-0.676092	0.084575	-7.99399	1.30639e-15	7.52643e-15
IFFO1	486.024	-0.676082	0.0978485	-6.90948	4.86418e-12	2.30402e-11
CDC20	3746.86	-0.676015	0.0388433	-17.4037	7.7406e-68	1.68333e-66
SPOCK2	68.4556	-0.675937	0.212507	-3.18078	0.00146877	0.0034993
LOC101927045	124.479	-0.675855	0.165229	-4.09042	4.30594e-05	0.000121771
ETS2	2795.21	-0.675652	0.039879	-16.9425	2.18469e-64	4.45232e-63
ZNF219	416.417	-0.675588	0.096962	-6.96755	3.22507e-12	1.54422e-11
LRRC14	780.27	-0.675453	0.0684551	-9.8671	5.78126e-23	4.42809e-22
MUT	693.275	-0.675304	0.0774543	-8.71875	2.81296e-18	1.81816e-17
RUSC1	588.975	-0.675204	0.0785718	-8.59347	8.43838e-18	5.35147e-17
RPL23AP82	109.999	-0.67496	0.174504	-3.86787	0.000109788	0.000297407
FN3KRP	770.355	-0.674857	0.0686419	-9.83156	8.23313e-23	6.2753e-22
PTPRF	127.093	-0.674734	0.16836	-4.00769	6.13161e-05	0.000170676
PARD6G	132.616	-0.674526	0.165419	-4.07767	4.54891e-05	0.00012841
ARRB1	470.61	-0.674431	0.0892884	-7.5534	4.2404e-14	2.27089e-13
GSC	166.733	-0.674343	0.146664	-4.59787	4.26841e-06	1.32991e-05
ERLIN1	1320.78	-0.674101	0.055287	-12.1928	3.39708e-34	3.72206e-33
C9orf69	995.621	-0.673865	0.063675	-10.5829	3.57744e-26	3.08382e-25
ANKRD36C	193.763	-0.673837	0.138454	-4.86685	1.1339e-06	3.71127e-06
SLC25A13	161.968	-0.672926	0.146658	-4.58841	4.46625e-06	1.38903e-05
CTSF	95.8201	-0.672497	0.188271	-3.57197	0.000354308	0.000911366
LMNB2	5089.54	-0.671878	0.0336747	-19.952	1.44003e-88	4.20744e-87
ERCC6L	829.802	-0.671647	0.0700833	-9.58355	9.37637e-22	6.92843e-21
GCDH	790.369	-0.670716	0.0681012	-9.84881	6.93598e-23	5.296e-22
TCFL5	416.471	-0.670609	0.0960207	-6.984	2.86885e-12	1.37673e-11
PCTP	320.176	-0.670327	0.102764	-6.52299	6.89197e-11	3.05874e-10
ARL4D	49.5506	-0.669974	0.253674	-2.64108	0.00826417	0.0175803
LOC100506730	53.0785	-0.669526	0.243748	-2.7468	0.00601807	0.0130824
HS6ST1	641.365	-0.668864	0.0769277	-8.69471	3.47728e-18	2.2408e-17
WNK2	231.074	-0.668145	0.12442	-5.37006	7.87084e-08	2.83958e-07
MFNG	1733.06	-0.667367	0.0489803	-13.6252	2.83559e-42	3.82682e-41
COPRS	836.922	-0.667152	0.068149	-9.78961	1.24773e-22	9.45568e-22
ATP8A1	482.541	-0.667066	0.0861298	-7.74489	9.56676e-15	5.29671e-14
ENKD1	245.872	-0.666874	0.122604	-5.43924	5.35073e-08	1.96045e-07
GAS8	271.915	-0.666609	0.112327	-5.93456	2.94634e-09	1.18266e-08
GLUL	7366.5	-0.666523	0.0280238	-23.7842	4.86773e-125	2.1012e-123
ZNF69	68.1884	-0.666199	0.21405	-3.11235	0.00185605	0.00435906
SLC25A1	1276.82	-0.665811	0.0569876	-11.6834	1.54904e-31	1.57284e-30
HIP1R	1060.72	-0.665785	0.0605225	-11.0006	3.79513e-28	3.48478e-27
TLE3	2346.98	-0.665713	0.0455223	-14.6239	1.97746e-48	3.04962e-47
ARL4C	873.563	-0.665596	0.0649638	-10.2457	1.23784e-24	1.00835e-23
MON1A	228.106	-0.665478	0.129613	-5.13437	2.83093e-07	9.76027e-07
CEP250	1933.41	-0.665073	0.0457348	-14.5419	6.57146e-48	1.00443e-46
LOC90784	343.631	-0.665021	0.1185	-5.61201	1.99989e-08	7.54128e-08
ZNF488	48.6305	-0.665007	0.250444	-2.65532	0.0079234	0.0168888
SLC9A9	105.147	-0.664616	0.176539	-3.76469	0.000166754	0.000444091
FAM213A	1170.79	-0.663855	0.0576392	-11.5174	1.07789e-30	1.06856e-29
AGPS	2216.06	-0.663127	0.0473378	-14.0084	1.38483e-44	1.96949e-43
HSH2D	81.8898	-0.662571	0.199835	-3.31559	0.000914507	0.00223902
ACY1	54.6479	-0.662085	0.23978	-2.76122	0.00575855	0.012566
PMS2	269.899	-0.661335	0.11618	-5.69233	1.2532e-08	4.79615e-08
TSPAN33	396.712	-0.660777	0.0934445	-7.07133	1.53452e-12	7.4789e-12
CCDC86	1380.45	-0.659549	0.0531864	-12.4007	2.59003e-35	2.9332e-34
SIGIRR	512.943	-0.659392	0.0849596	-7.76124	8.4105e-15	4.67008e-14
B4GALT2	359.886	-0.659377	0.0973151	-6.77569	1.23814e-11	5.73657e-11
HOXC10	662.675	-0.659224	0.0761069	-8.66182	4.64283e-18	2.96851e-17
PML	1085.74	-0.659149	0.0664604	-9.91793	3.47907e-23	2.69115e-22
FNDC8	195.448	-0.658274	0.134365	-4.89915	9.62498e-07	3.16716e-06
LOC102723820	39.9636	-0.65792	0.271824	-2.42039	0.0155038	0.0313506
SEPW1	1664.12	-0.657383	0.0509312	-12.9073	4.09456e-38	5.01744e-37
MSH6	1863.62	-0.656867	0.0509268	-12.8983	4.60425e-38	5.62996e-37
PET117	119.42	-0.656141	0.165515	-3.96424	7.36303e-05	0.000203143
KRI1	1352.13	-0.655972	0.0592474	-11.0717	1.72039e-28	1.59248e-27
SWI5	501.8	-0.655777	0.0845556	-7.75557	8.7947e-15	4.88184e-14
FKBP1B	35.8729	-0.65481	0.288993	-2.26583	0.0234615	0.0459129
SIGMAR1	1907.55	-0.65462	0.052048	-12.5772	2.81723e-36	3.27914e-35
FASTK	1073.91	-0.654174	0.0689796	-9.48358	2.45697e-21	1.79239e-20
RASA4CP	33.5169	-0.65412	0.292617	-2.23542	0.02539	0.0492658
ZNF599	107.596	-0.653629	0.17383	-3.76016	0.000169807	0.000451731
PRKCA	1789.12	-0.653152	0.0533046	-12.2532	1.61488e-34	1.78531e-33
TRIM13	570.701	-0.653126	0.0920854	-7.09261	1.31601e-12	6.44318e-12
WDR92	360.662	-0.652878	0.0981743	-6.65019	2.92709e-11	1.33e-10
RAD9A	687.077	-0.652178	0.0767673	-8.49551	1.9706e-17	1.23739e-16
DDX51	1728.21	-0.652146	0.0541474	-12.0439	2.08829e-33	2.2423e-32
TMEM203	744.574	-0.651584	0.0717639	-9.07956	1.09019e-19	7.44118e-19
MPP5	713.784	-0.651308	0.0761532	-8.55261	1.20339e-17	7.60922e-17
C11orf83	265.912	-0.651074	0.116913	-5.56885	2.56421e-08	9.59556e-08
SLC6A9	78.6345	-0.651004	0.204756	-3.17941	0.00147577	0.00351422
DYNLL2	1333.66	-0.650984	0.057222	-11.3765	5.47805e-30	5.31711e-29
HOXA6	39.6992	-0.649916	0.272405	-2.38585	0.0170398	0.034207
PECR	167.349	-0.649868	0.142918	-4.54715	5.43773e-06	1.6766e-05
ZNHIT2	322.029	-0.649626	0.107442	-6.04631	1.482e-09	6.05488e-09
NMRK1	254.541	-0.649504	0.121636	-5.33975	9.30737e-08	3.33057e-07
FAM58A	377.099	-0.649397	0.0962332	-6.74816	1.49733e-11	6.90395e-11
ANKZF1	586.133	-0.649207	0.0814813	-7.96756	1.61841e-15	9.28979e-15
MAGEE1	167.61	-0.649111	0.141754	-4.57915	4.66877e-06	1.44966e-05
RBFA	887.62	-0.648976	0.0641988	-10.1089	5.04709e-24	4.01431e-23
CRAT	538.221	-0.648805	0.0840955	-7.71509	1.20894e-14	6.65691e-14
VLDLR	435.806	-0.647064	0.0898328	-7.20298	5.89098e-13	2.94121e-12
PCCA	146.437	-0.647054	0.154344	-4.19228	2.76167e-05	7.94998e-05
BAG1	1692.87	-0.646817	0.0485239	-13.3299	1.55181e-40	2.01665e-39
FAHD1	260.524	-0.646602	0.114331	-5.65553	1.55364e-08	5.90258e-08
TARBP1	1618.51	-0.645622	0.0495149	-13.039	7.34544e-39	9.13792e-38
JMJD7	101.607	-0.64561	0.182958	-3.52873	0.000417563	0.0010668
ST3GAL5	182.416	-0.645431	0.143089	-4.51071	6.46111e-06	1.97056e-05
FTSJ3	3827.26	-0.645332	0.034603	-18.6496	1.27259e-77	3.20574e-76
GABRB3	350.704	-0.644733	0.103995	-6.19964	5.65914e-10	2.37537e-09
TDRD3	264.425	-0.64433	0.11503	-5.60143	2.12588e-08	7.99882e-08
ZRANB3	205.541	-0.644145	0.13469	-4.78242	1.73196e-06	5.59728e-06
BCORP1	264.331	-0.643477	0.114101	-5.63955	1.70495e-08	6.4603e-08
SORD	1098.45	-0.643411	0.0600451	-10.7155	8.6134e-27	7.56535e-26
RAP1GDS1	3518.01	-0.643135	0.0389383	-16.5168	2.77888e-61	5.38231e-60
LIX1L	1006.96	-0.642956	0.0609801	-10.5437	5.43219e-26	4.6523e-25
PPP1R21	194.365	-0.642741	0.132913	-4.83582	1.326e-06	4.31698e-06
BCHE	225.232	-0.64248	0.128814	-4.98764	6.1121e-07	2.0465e-06
TEF	143.417	-0.642274	0.152783	-4.20383	2.62432e-05	7.56983e-05
PRIM1	949.185	-0.642152	0.0634074	-10.1274	4.17617e-24	3.33861e-23
GALK1	781.08	-0.641683	0.0740682	-8.66341	4.57856e-18	2.93069e-17
OTX1	70.0878	-0.641669	0.210949	-3.04182	0.0023515	0.00545192
PODXL	44.4097	-0.641596	0.25796	-2.48719	0.0128758	0.0265076
MRPS31P5	177.523	-0.641504	0.149492	-4.29122	1.77693e-05	5.21127e-05
IFI30	591.563	-0.640969	0.0789146	-8.12232	4.5737e-16	2.69004e-15
TTC7A	859.166	-0.64088	0.0685244	-9.35259	8.55308e-21	6.08707e-20
LOC102724248	55.5337	-0.640842	0.235771	-2.71807	0.00656631	0.0141845
TBC1D14	867.945	-0.640631	0.0643623	-9.95352	2.43419e-23	1.88984e-22
FKBP5	910.883	-0.640483	0.0642397	-9.97021	2.05801e-23	1.60275e-22
PLCB1	241.001	-0.640352	0.118014	-5.42608	5.76062e-08	2.10345e-07
PXMP2	391.97	-0.638782	0.0957354	-6.67236	2.51718e-11	1.14831e-10
KHDRBS3	503.53	-0.638292	0.0862177	-7.40326	1.32885e-13	6.91387e-13
FAM173A	492.224	-0.637994	0.0858086	-7.43509	1.04498e-13	5.46507e-13
UBN1	2696.11	-0.637442	0.0464382	-13.7267	7.02961e-43	9.56963e-42
GTF3C5	2105.08	-0.637069	0.0473901	-13.4431	3.38001e-41	4.43949e-40
INPP5A	214.993	-0.636677	0.128574	-4.95184	7.35164e-07	2.44296e-06
HYAL2	384.411	-0.636062	0.0974307	-6.52835	6.64977e-11	2.95354e-10
RCC1	3969.24	-0.635583	0.0374288	-16.9811	1.13274e-64	2.33339e-63
KIAA1671	43.9383	-0.634605	0.259767	-2.44297	0.0145667	0.0296442
CCM2	1791.64	-0.634469	0.0469701	-13.5079	1.40402e-41	1.86119e-40
CCDC96	98.0117	-0.634253	0.181084	-3.50254	0.000460844	0.00117102
GAL3ST4	91.1883	-0.633338	0.1961	-3.22968	0.00123931	0.00298658
ABCB9	125.035	-0.633323	0.164117	-3.85897	0.000113868	0.000308071
ZBTB44	1739.15	-0.63304	0.0538906	-11.7468	7.3373e-32	7.51221e-31
PRR5	277.977	-0.632939	0.111257	-5.689	1.27785e-08	4.88398e-08
CCDC138	366.758	-0.632434	0.0967974	-6.53359	6.42132e-11	2.85503e-10
SGSM2	1234.48	-0.632223	0.0567764	-11.1353	8.44411e-29	7.91434e-28
FBXO16	51.0097	-0.631875	0.24264	-2.60417	0.00920971	0.0194305
C14orf159	427.905	-0.631531	0.092189	-6.85039	7.36464e-12	3.4579e-11
FECH	1332.28	-0.631087	0.0567478	-11.1209	9.92609e-29	9.28308e-28
TGFBR3L	303.172	-0.63105	0.121515	-5.1932	2.06711e-07	7.21513e-07
CECR5	1482.76	-0.630852	0.0525538	-12.0039	3.38819e-33	3.60651e-32
STEAP1	159.078	-0.630573	0.144375	-4.3676	1.25618e-05	3.73571e-05
PELP1	2960.37	-0.630529	0.0440864	-14.3021	2.1225e-46	3.15165e-45
DPP10-AS1	51.7671	-0.630431	0.242024	-2.60483	0.00919207	0.0193981
EFEMP1	1020.85	-0.629802	0.0623884	-10.0948	5.82241e-24	4.61814e-23
WIPF1	885.188	-0.62974	0.0667243	-9.43794	3.8019e-21	2.75134e-20
BCDIN3D	99.3366	-0.629614	0.184569	-3.41126	0.000646644	0.00161426
RBM15B	2963.27	-0.629454	0.0440759	-14.2811	2.86888e-46	4.2416e-45
TMED3	2416.83	-0.629263	0.0417761	-15.0628	2.84591e-51	4.6476e-50
ZNF491	37.42	-0.628849	0.279313	-2.25141	0.0243597	0.0474435
TPTEP1	1170.22	-0.628462	0.0565536	-11.1127	1.08842e-28	1.01515e-27
HS1BP3	165.538	-0.62762	0.142057	-4.41808	9.95834e-06	2.98629e-05
ROPN1L	66.1578	-0.627412	0.216313	-2.90048	0.00372594	0.0083741
HDAC10	821.591	-0.627373	0.0802477	-7.81795	5.36889e-15	3.01627e-14
MAVS	1661.17	-0.627357	0.0519866	-12.0677	1.565e-33	1.68463e-32
C19orf54	522.589	-0.626652	0.0849068	-7.38047	1.57728e-13	8.17426e-13
ABCC5	161.96	-0.626538	0.154076	-4.06642	4.77403e-05	0.000134258
NUDT14	109.338	-0.626336	0.173345	-3.61324	0.000302395	0.000784054
DNASE1L1	66.6029	-0.626116	0.221057	-2.83237	0.00462036	0.0102382
SMARCA4	10724.2	-0.626072	0.0306397	-20.4334	8.44608e-93	2.60978e-91
NDN	729.217	-0.626063	0.0743871	-8.41628	3.88631e-17	2.40428e-16
ZNF575	88.8858	-0.625833	0.206193	-3.03518	0.00240393	0.00555998
TIMM13	1610.65	-0.625617	0.0526388	-11.8851	1.41459e-32	1.48006e-31
PSKH1	563.318	-0.625447	0.0810102	-7.7206	1.15784e-14	6.3817e-14
SLC45A4	479.87	-0.625402	0.0847995	-7.37506	1.64266e-13	8.49515e-13
KLHL26	295.646	-0.625222	0.107424	-5.82016	5.87914e-09	2.31024e-08
USP13	650.308	-0.624729	0.0780535	-8.00385	1.20585e-15	6.95418e-15
RAB40C	369.707	-0.624546	0.0956981	-6.5262	6.74577e-11	2.99463e-10
SOGA1	361.346	-0.624336	0.104047	-6.00054	1.96663e-09	7.98363e-09
HCFC1	5713.38	-0.624049	0.0410791	-15.1914	4.03258e-52	6.66151e-51
ACACB	185.763	-0.623651	0.135103	-4.61612	3.90982e-06	1.2224e-05
NUGGC	73.7558	-0.623373	0.204703	-3.04526	0.00232479	0.00539146
PLIN2	271.491	-0.62307	0.119189	-5.22759	1.71736e-07	6.03975e-07
MAP7D1	3193.65	-0.622781	0.0403546	-15.4327	9.86115e-54	1.68237e-52
MASP2	78.8634	-0.622753	0.201075	-3.09711	0.00195416	0.00457764
NAGLU	126.33	-0.62236	0.164944	-3.77317	0.000161187	0.00043
THAP7	558.636	-0.622042	0.0840902	-7.39732	1.38962e-13	7.21913e-13
HAUS7	635.394	-0.62203	0.0759567	-8.18926	2.6283e-16	1.56676e-15
ABHD15	315.132	-0.621452	0.105928	-5.86676	4.44404e-09	1.76243e-08
RRP36	1547.76	-0.621081	0.0502802	-12.3524	4.72816e-35	5.29875e-34
CACFD1	125.875	-0.620929	0.162786	-3.81438	0.000136526	0.000366658
ALG1	706.501	-0.619602	0.0764233	-8.1075	5.16739e-16	3.02886e-15
ZNF688	79.2988	-0.619486	0.208075	-2.97723	0.00290869	0.00664777
ENAH	387.092	-0.619383	0.0950916	-6.51354	7.34021e-11	3.256e-10
RNASEH2C	999.773	-0.618642	0.0657792	-9.40482	5.21206e-21	3.75286e-20
ARHGAP33	798.719	-0.618573	0.143688	-4.30496	1.67015e-05	4.909e-05
SRP14-AS1	49.7817	-0.618546	0.24648	-2.50951	0.0120898	0.0250033
PRR19	63.0967	-0.61847	0.22431	-2.75721	0.00582962	0.0127065
DENND1A	1020.87	-0.618346	0.0620629	-9.96322	2.20799e-23	1.71721e-22
MRPL18	2075.74	-0.618285	0.0447462	-13.8176	1.99597e-43	2.75207e-42
UBE3D	133.188	-0.616667	0.155189	-3.97367	7.07749e-05	0.000195642
KIAA0100	4487.36	-0.616177	0.0368607	-16.7164	9.95929e-63	1.9532e-61
CAPS2	55.8464	-0.616094	0.244827	-2.51645	0.0118544	0.0245639
CSK	4213.26	-0.615717	0.0366619	-16.7945	2.67875e-63	5.32649e-62
GLG1	4216.07	-0.615382	0.0362325	-16.9843	1.07359e-64	2.2142e-63
ZNF788	329.265	-0.615218	0.109609	-5.61284	1.9903e-08	7.50843e-08
LOC102606465	94.5817	-0.614914	0.188874	-3.25568	0.00113119	0.00274025
PC	662.59	-0.614538	0.0793975	-7.74001	9.94096e-15	5.49857e-14
STARD7-AS1	40.8253	-0.613521	0.268348	-2.28629	0.0222374	0.0437016
GNG13	87.3906	-0.61344	0.194527	-3.15349	0.00161329	0.00381714
SEPHS2	2172.62	-0.61322	0.0454635	-13.4882	1.83557e-41	2.42578e-40
DGCR2	1225.21	-0.613164	0.0557733	-10.9939	4.09014e-28	3.74966e-27
GPSM2	748.543	-0.61297	0.0734417	-8.34634	7.0409e-17	4.2986e-16
RHOQ	130.739	-0.612917	0.169	-3.62672	0.000287045	0.000746735
CD1E	141.892	-0.612722	0.152087	-4.02875	5.6075e-05	0.000156696
LOC158960	50.2652	-0.611946	0.247929	-2.46823	0.0135784	0.0278042
SHPK	442.436	-0.611767	0.093104	-6.57079	5.00476e-11	2.23619e-10
FBXO44	562.789	-0.611737	0.0856045	-7.14609	8.92849e-13	4.4078e-12
AIF1L	190.24	-0.611597	0.131154	-4.66318	3.11356e-06	9.83109e-06
ENTPD6	1138.73	-0.611514	0.0600256	-10.1876	2.25362e-24	1.81771e-23
GPC2	159.727	-0.611395	0.145868	-4.19144	2.77195e-05	7.97557e-05
CTDP1	409.544	-0.61128	0.0963339	-6.34543	2.21805e-10	9.52891e-10
BNIP3L	1829.2	-0.610723	0.0485953	-12.5675	3.18517e-36	3.69988e-35
HSDL1	1445.12	-0.610718	0.0518023	-11.7894	4.42667e-32	4.55936e-31
AVIL	52.3416	-0.610637	0.250441	-2.43825	0.0147586	0.0299885
RNASE4	51.0145	-0.610443	0.250806	-2.43393	0.0149359	0.0302986
LINC01089	332.871	-0.610344	0.115033	-5.3058	1.12182e-07	3.9886e-07
C17orf51	1649.64	-0.609772	0.0491115	-12.4161	2.13823e-35	2.42955e-34
LRRC28	1679.15	-0.609771	0.0512254	-11.9037	1.13246e-32	1.18777e-31
SLC7A5P2	44.6656	-0.609768	0.265358	-2.2979	0.0215673	0.0424868
ZNF592	1522.92	-0.609735	0.0545333	-11.181	5.05373e-29	4.76264e-28
PLXND1	1249.23	-0.609697	0.0603	-10.1111	4.93465e-24	3.92851e-23
NAP1L4-2	48.3658	-0.60969	0.248997	-2.44859	0.0143418	0.0292245
TRMT2A	1190.08	-0.609381	0.0603109	-10.104	5.30343e-24	4.21429e-23
ADTRP	143.618	-0.609183	0.159669	-3.81528	0.000136028	0.000365378
GFI1	691.817	-0.609173	0.0736691	-8.26904	1.35037e-16	8.1487e-16
CCDC73	53.617	-0.609093	0.238247	-2.55657	0.0105711	0.0221074
CCDC134	89.4037	-0.60886	0.190763	-3.19171	0.00141435	0.00337761
C14orf119	1476.14	-0.608279	0.0520397	-11.6888	1.45509e-31	1.48007e-30
LOC101927279	56.1628	-0.607877	0.234071	-2.59697	0.00940488	0.019818
LMO7	498.457	-0.60786	0.0854604	-7.11276	1.13742e-12	5.58628e-12
TSHZ1	708.217	-0.607755	0.0765825	-7.93595	2.08891e-15	1.19267e-14
ABHD14A	116.575	-0.607628	0.17607	-3.45105	0.000558401	0.00140459
SLC39A10	277.943	-0.60752	0.112665	-5.39228	6.9571e-08	2.51839e-07
BIRC5	2686.17	-0.607308	0.0394747	-15.3847	2.07179e-53	3.49296e-52
KLHL22	270.584	-0.607024	0.1134	-5.35296	8.65258e-08	3.10726e-07
TEX264	802.483	-0.606863	0.0694724	-8.73531	2.42983e-18	1.57467e-17
PMS1	572.999	-0.606577	0.0797715	-7.60393	2.87279e-14	1.55301e-13
MSL2	2019.69	-0.606346	0.0483433	-12.5425	4.36963e-36	5.05864e-35
ZNF184	481.913	-0.606037	0.08825	-6.86728	6.54394e-12	3.07676e-11
ECE2	308.107	-0.605379	0.109754	-5.51578	3.47243e-08	1.28717e-07
EXD2	90.9071	-0.605244	0.187815	-3.22255	0.00127053	0.00305642
BRF1	939.342	-0.604573	0.0661972	-9.13291	6.66846e-20	4.5844e-19
CCDC183	78.7978	-0.604424	0.211024	-2.86424	0.00418008	0.00932526
PAX6	783.299	-0.604419	0.0713301	-8.47355	2.38025e-17	1.48809e-16
UNC119	330.614	-0.604217	0.102515	-5.89396	3.77058e-09	1.50159e-08
UCP2	989.782	-0.60413	0.0637048	-9.48327	2.4644e-21	1.79705e-20
BRAT1	1917.25	-0.603269	0.0491668	-12.2698	1.31513e-34	1.45674e-33
UBE2O	1671.69	-0.603261	0.0485225	-12.4326	1.73893e-35	1.98109e-34
AADAT	160.663	-0.602883	0.147002	-4.1012	4.11013e-05	0.000116387
SUGP2	2097.24	-0.602174	0.0490402	-12.2792	1.17162e-34	1.30029e-33
MDK	103.991	-0.602051	0.175675	-3.42708	0.00061012	0.00152841
HSD17B4	1676.06	-0.602024	0.0516682	-11.6517	2.2486e-31	2.27241e-30
SETDB2	322.853	-0.601949	0.104808	-5.74337	9.28105e-09	3.59037e-08
FZD3	300.583	-0.601865	0.109965	-5.47324	4.41878e-08	1.62942e-07
DPF1	183.641	-0.601781	0.139874	-4.30229	1.69041e-05	4.96602e-05
ZNF22	2538.5	-0.60165	0.042467	-14.1675	1.45642e-45	2.1115e-44
IRAK1BP1	200.751	-0.601526	0.134727	-4.46477	8.01554e-06	2.41973e-05
CEBPA	96.5728	-0.601439	0.180863	-3.32539	0.000882958	0.00216641
SH3PXD2B	178.467	-0.601244	0.149692	-4.01654	5.90587e-05	0.000164659
TMEM129	306.061	-0.600547	0.120002	-5.00449	5.60105e-07	1.88125e-06
LOC100506603	49.5974	-0.600513	0.252089	-2.38215	0.017212	0.0345284
L2HGDH	541.787	-0.600212	0.0848014	-7.07785	1.46407e-12	7.14971e-12
RRP1B	4083.07	-0.599979	0.0353659	-16.9649	1.49302e-64	3.06453e-63
KLF13	52.2222	-0.599914	0.244659	-2.45204	0.0142049	0.0289731
SPPL2B	1256.9	-0.59969	0.114548	-5.23526	1.64751e-07	5.80124e-07
PBXIP1	405.573	-0.599257	0.0953539	-6.28455	3.28794e-10	1.39543e-09
PIK3R2	1060.39	-0.599014	0.059299	-10.1016	5.4354e-24	4.31516e-23
FNTB	57.0319	-0.598829	0.233937	-2.55979	0.0104735	0.0219179
ARMC6	1573.33	-0.59842	0.0546102	-10.958	6.08091e-28	5.53924e-27
NAGPA	717.247	-0.598171	0.070905	-8.43623	3.27736e-17	2.03708e-16
CDK5RAP2	2658.11	-0.597699	0.0401984	-14.8687	5.26116e-50	8.33058e-49
ADRBK2	5065.2	-0.597531	0.0345016	-17.3189	3.38509e-67	7.28771e-66
NEU3	771.137	-0.597496	0.0698818	-8.55009	1.22989e-17	7.77392e-17
RCAN3	407.815	-0.596954	0.0930785	-6.41345	1.42263e-10	6.20008e-10
CCDC74A	427.103	-0.596516	0.0978544	-6.09595	1.08786e-09	4.50024e-09
LIG4	1910.27	-0.596455	0.0461365	-12.9281	3.12621e-38	3.83631e-37
GP1BA	58.9154	-0.596418	0.227821	-2.61793	0.00884655	0.0187195
THNSL1	527.271	-0.595995	0.0845664	-7.04766	1.81954e-12	8.84042e-12
RP5-1043L13.1	44.8676	-0.595866	0.256112	-2.32658	0.0199876	0.0396338
GLRX5	1730.78	-0.595714	0.0493489	-12.0715	1.49466e-33	1.61194e-32
PELI2	1545.72	-0.595567	0.0514285	-11.5805	5.17479e-31	5.18686e-30
SLC44A1	984.986	-0.595433	0.0635781	-9.36538	7.57788e-21	5.40872e-20
RP11-473M20.14	60.2516	-0.595407	0.223617	-2.66261	0.00775361	0.0165619
CD247	1565.73	-0.595363	0.0512642	-11.6136	3.5143e-31	3.53902e-30
GUK1	4769.16	-0.59477	0.0364058	-16.3372	5.36496e-60	1.01958e-58
TRABD	1437.88	-0.594714	0.0557279	-10.6717	1.3803e-26	1.20557e-25
ACSF2	315.549	-0.594472	0.108916	-5.45807	4.81328e-08	1.76995e-07
SSBP4	2753.79	-0.594143	0.0466058	-12.7483	3.18692e-37	3.82609e-36
RANGRF	190.238	-0.593717	0.132973	-4.46494	8.0092e-06	2.41867e-05
CDH4	394.543	-0.593601	0.0935584	-6.34471	2.22841e-10	9.56863e-10
TMEM54	265.344	-0.593506	0.114335	-5.19095	2.09225e-07	7.294e-07
HNRNPF	9049.63	-0.593244	0.0269671	-21.9988	2.95691e-107	1.06947e-105
HDAC11	78.327	-0.592854	0.214261	-2.76697	0.00565801	0.0123607
CTCF	3590.39	-0.592805	0.0356547	-16.6263	4.49564e-62	8.7867e-61
PRKCB	3088.51	-0.592677	0.0422721	-14.0205	1.16728e-44	1.6656e-43
DHTKD1	518.838	-0.592573	0.0827853	-7.15795	8.18923e-13	4.05333e-12
LMO4	567.279	-0.592415	0.0798699	-7.41725	1.19578e-13	6.23854e-13
UBE2E2	493.92	-0.592354	0.0842359	-7.03208	2.03476e-12	9.85544e-12
GYS1	1391.8	-0.591922	0.0531367	-11.1396	8.04684e-29	7.54611e-28
IL17D	114.196	-0.591768	0.168748	-3.50681	0.00045351	0.00115358
STARD9	295.957	-0.591654	0.11576	-5.11105	3.20372e-07	1.1008e-06
UBE2G1	1830.33	-0.591432	0.0474035	-12.4766	1.00229e-35	1.14872e-34
HDHD1	607.183	-0.591164	0.0770567	-7.6718	1.69602e-14	9.27062e-14
PINK1	298.382	-0.591153	0.11465	-5.15613	2.52108e-07	8.73229e-07
SMAD2	3273.18	-0.590527	0.0454385	-12.9962	1.28644e-38	1.59e-37
HERC5	898.515	-0.590073	0.0634071	-9.30611	1.32601e-20	9.35939e-20
NICN1	270.828	-0.589546	0.117926	-4.99928	5.75455e-07	1.92941e-06
ZNF787	671.952	-0.589385	0.0811268	-7.26499	3.73073e-13	1.88734e-12
ST5	94.664	-0.589346	0.183929	-3.20421	0.00135432	0.00324283
MED16-2	70.699	-0.588994	0.211983	-2.77849	0.00546124	0.0119597
LOC101929747	50.7907	-0.588766	0.24362	-2.41674	0.0156602	0.0316372
PFAS	2590.82	-0.588614	0.0420408	-14.001	1.53634e-44	2.17954e-43
ZMYND8	638.3	-0.58838	0.0764279	-7.6985	1.37673e-14	7.55901e-14
AARS	3743.13	-0.588286	0.0359253	-16.3752	2.87344e-60	5.48508e-59
INVS	214.044	-0.588274	0.129927	-4.52771	5.96251e-06	1.82595e-05
SEMA4G	84.5526	-0.588245	0.199722	-2.94531	0.00322627	0.00731425
LGMN	889.267	-0.588213	0.064208	-9.16105	5.13925e-20	3.55301e-19
TRNT	82.3039	-0.588113	0.201387	-2.92032	0.00349671	0.00789092
ZNF512	1307.29	-0.588009	0.058013	-10.1358	3.83198e-24	3.06629e-23
CMC4	199.171	-0.587082	0.130438	-4.50085	6.76808e-06	2.05907e-05
GNB4	1008.31	-0.585973	0.0610441	-9.59917	8.05922e-22	5.96028e-21
FAM210B	365.037	-0.585808	0.0973038	-6.0204	1.73984e-09	7.08303e-09
HECTD3	1021.82	-0.585237	0.0608964	-9.61037	7.229e-22	5.36013e-21
IL8	12836.8	10.5434	0.195069	54.0497	0	0
IL2	2593.76	9.77403	0.309796	31.5499	1.79712e-218	1.44273e-216
IL3	2207.7	9.63897	0.318453	30.2681	3.01543e-201	2.28216e-199
NR4A3	3349.73	9.00453	0.23505	38.309	0	0
EGR2	1907.8	8.6674	0.256015	33.8551	3.05446e-251	2.9316e-249
CSF2	1132.99	8.62571	0.314595	27.4185	1.65125e-165	1.00955e-163
CRTAM	1249.9	8.61576	0.300837	28.6393	2.18024e-180	1.48049e-178
XIRP1	697.418	8.45002	0.360269	23.4547	1.18282e-121	4.89658e-120
ENTPD2	752.403	8.35221	0.341945	24.4256	9.15203e-132	4.1817e-130
CD69	11943.6	8.13255	0.092488	87.9309	0	0
MMP10	729.405	8.00182	0.34015	23.5244	2.29658e-122	9.62324e-121
TTC40	359.326	7.40828	0.35635	20.7894	5.40262e-96	1.69684e-94
IL2RA	311.039	7.33148	0.368185	19.9125	3.17133e-88	9.20327e-87
GZMB	611.756	7.28213	0.280681	25.9445	2.09778e-148	1.12625e-146
EGR3	837.003	7.18418	0.239435	30.0046	8.53504e-198	6.43122e-196
HCAR1	765.565	7.10421	0.242362	29.3123	7.22364e-189	5.17092e-187
KIF25-AS1	234.632	7.09049	0.384517	18.44	6.27603e-76	1.54695e-74
PLAU	1282.25	6.98933	0.188391	37.1001	2.80039e-301	3.59035e-299
RAB7B	236.073	6.98237	0.374666	18.6363	1.63235e-77	4.10597e-76
EGR1	8967.02	6.98081	0.101936	68.4821	0	0
SERPINB2	538.717	6.96732	0.279319	24.9439	2.48621e-137	1.19981e-135
IER3	607.425	6.91615	0.254298	27.197	7.04138e-163	4.20038e-161
CCL3L1	202.825	6.90857	0.38821	17.796	7.5925e-71	1.73226e-69
TRAF1	3654.03	6.88801	0.110157	62.5288	0	0
SLC22A1	216.636	6.83772	0.379509	18.0173	1.42602e-72	3.36064e-71
CCL1	315.729	6.7205	0.316496	21.234	4.63075e-100	1.52699e-98
BCL2A1	1205.08	6.71185	0.175417	38.2623	0	0
TNS3	236.447	6.66568	0.350222	19.0328	9.13263e-81	2.38811e-79
XCL1	176	6.59582	0.383121	17.216	2.01458e-66	4.28878e-65
NR4A2	481.523	6.54191	0.255547	25.5997	1.53869e-144	7.79784e-143
TNFSF14	2896.38	6.52928	0.110121	59.2917	0	0
CCL20	150.611	6.52703	0.396818	16.4484	8.61132e-61	1.65299e-59
GBP2	393.24	6.36493	0.263006	24.2007	2.18465e-129	9.74866e-128
IFNG	127.012	6.31918	0.401301	15.7467	7.23486e-56	1.28537e-54
FASLG	123.557	6.28765	0.401882	15.6455	3.56548e-55	6.2505e-54
SDC4	2980.61	6.23477	0.0994211	62.7107	0	0
LOC101927402	226.391	6.20165	0.317167	19.5533	3.86765e-85	1.07171e-83
IER3-5	323.685	6.19332	0.274286	22.5798	6.84371e-113	2.64213e-111
NR4A1	2101.7	6.0452	0.11416	52.9538	0	0
ARC	443.292	6.0354	0.229636	26.2825	3.04317e-152	1.69746e-150
DUSP5	1305.18	6.02908	0.13789	43.7238	0	0
PTGS2	117.253	5.9634	0.384769	15.4987	3.54181e-54	6.10313e-53
SPRY4	1387.02	5.93444	0.130366	45.5214	0	0
RP11-24J23.2	92.2804	5.91692	0.410975	14.3973	5.38263e-47	8.09043e-46
IL21R	672.21	5.87707	0.181103	32.4516	5.14332e-231	4.41811e-229
IL23A	718.596	5.8275	0.17519	33.264	1.2823e-242	1.1718e-240
GBP5	264.901	5.81276	0.269993	21.5293	8.27292e-103	2.85974e-101
NFKBID	2472.68	5.80238	0.0978713	59.2858	0	0
RELB	2166.55	5.80162	0.102537	56.5805	0	0
FRMD1	83.5639	5.79186	0.414213	13.9828	1.98518e-44	2.80473e-43
TNFRSF18	183.641	5.77351	0.310961	18.5667	5.98133e-77	1.48711e-75
MIR155HG	264.08	5.71266	0.263345	21.6927	2.40693e-104	8.43899e-103
SEMA7A	3927.78	5.57949	0.0731897	76.2333	0	0
DUSP2	16766.4	5.54315	0.0410117	135.16	0	0
TBX21	350.611	5.53575	0.222387	24.8924	8.99887e-137	4.30642e-135
LTA-2	197.301	5.50908	0.283195	19.4533	2.73043e-84	7.43844e-83
BTBD19	130.791	5.45664	0.330104	16.5301	2.22789e-61	4.31999e-60
RP13-895J2.7	61.7416	5.40956	0.424236	12.7513	3.06586e-37	3.68332e-36
FUT7	66.1531	5.36547	0.411116	13.051	6.27164e-39	7.82475e-38
CDKN1A	2282.79	5.34967	0.128566	41.6104	0	0
TRIM67	141.654	5.28582	0.307385	17.1961	2.8395e-66	6.02254e-65
ADAM19	364.142	5.27664	0.203052	25.9867	7.00477e-149	3.78434e-147
EGR4	107.862	5.27202	0.34188	15.4206	1.18912e-53	2.01868e-52
BIRC3	12251	5.24839	0.0433779	120.992	0	0
POU2AF1	2147.57	5.22115	0.0876002	59.602	0	0
PHLDA1	869.226	5.11641	0.130179	39.3028	0	0
ARHGAP31	1421.56	5.11464	0.103673	49.3344	0	0
CXCL10	54.657	5.11289	0.418426	12.2193	2.4504e-34	2.69858e-33
IL1RN	48.0015	5.0688	0.434514	11.6654	1.91433e-31	1.93802e-30
APOBEC3B	46.5155	5.05366	0.434096	11.6418	2.52615e-31	2.5514e-30
GEM	374.951	5.05339	0.190249	26.562	1.86798e-155	1.05914e-153
RGS16	318.465	5.03136	0.203001	24.7849	1.30431e-135	6.15607e-134
ARNT2	45.006	5.00699	0.435534	11.4962	1.37855e-30	1.36034e-29
SHC4	154.916	5.0058	0.279009	17.9413	5.60798e-72	1.29845e-70
XCL2	57.6355	5.00068	0.411336	12.1572	5.25506e-34	5.72855e-33
KRT9	83.059	4.99902	0.356712	14.0142	1.27671e-44	1.81873e-43
[truncated: 2,142 more rows]

## Sheet: TFII-I vs TFII-I PMA_Ion
Gene ID	Mean normalized counts	FC log2	log2 FC standard error	Wald statistic	p-value	Adjusted p-value
SMAD6	217.545	-4.52061	0.223896	-20.1907	1.18185e-90	2.42258e-89
HOXA13	30.6514	-4.32337	0.492185	-8.78405	1.57698e-18	8.13446e-18
CREB3L3	48.9615	-4.30901	0.41326	-10.4269	1.86959e-25	1.21406e-24
ADAMTS15	50.179	-4.24253	0.402055	-10.5521	4.96673e-26	3.29637e-25
ASB13	103.956	-4.11183	0.284429	-14.4564	2.28283e-47	2.50308e-46
CNR2	134.897	-4.05474	0.254612	-15.9252	4.23718e-57	5.5489e-56
RAG2	16.5811	-3.86851	0.559533	-6.91382	4.71778e-12	1.85942e-11
POU3F2	214.616	-3.86516	0.191688	-20.1638	2.03574e-90	4.16346e-89
ZNF521	435.308	-3.74579	0.133767	-28.0024	1.51976e-172	6.20936e-171
SLC17A9	22.5945	-3.72503	0.497138	-7.49294	6.73476e-14	2.87593e-13
HOXD-AS1	14.9554	-3.7111	0.568103	-6.53245	6.47041e-11	2.40332e-10
CEBPE	446.17	-3.65155	0.134681	-27.1125	7.01455e-162	2.63908e-160
NDST3	379.378	-3.62651	0.139151	-26.0618	9.90009e-150	3.40544e-148
TXNIP	867.758	-3.58562	0.0949789	-37.7518	0	0
C9	87.2485	-3.58524	0.27924	-12.8393	9.87452e-38	8.82355e-37
BAHCC1	1810.88	-3.576	0.0726152	-49.2459	0	0
ACKR3	18.5177	-3.44676	0.508698	-6.77565	1.23848e-11	4.7739e-11
SELPLG	754.306	-3.40362	0.0971606	-35.0309	7.61375e-269	5.39202e-267
LMO1	167.835	-3.3886	0.196418	-17.2519	1.08192e-66	1.63638e-65
ALDH1B1	98.2438	-3.3763	0.25438	-13.2727	3.33479e-40	3.15469e-39
PTGER3	350.936	-3.32794	0.138499	-24.0286	1.39663e-127	4.04194e-126
LRRC38	19.1291	-3.304	0.503957	-6.55611	5.52278e-11	2.05683e-10
PTCHD4	83.6601	-3.29427	0.268382	-12.2746	1.24028e-34	1.0317e-33
APLN	10.9963	-3.27627	0.589603	-5.55673	2.74872e-08	8.68122e-08
ZFP36L2	2261.58	-3.26773	0.0596846	-54.75	0	0
KCTD11	247.402	-3.2656	0.166136	-19.6563	5.10918e-86	1.00728e-84
FAT3	7.04161	-3.26199	0.645763	-5.05137	4.38646e-07	1.2891e-06
TENM1	36.7374	-3.25017	0.381518	-8.51905	1.60872e-17	7.99885e-17
PPM1H	70.9439	-3.22473	0.286529	-11.2545	2.20171e-29	1.6039e-28
RAB3D	510.762	-3.21052	0.115617	-27.7687	1.03714e-169	4.17142e-168
MIR3186	8.18342	-3.13317	0.623589	-5.02441	5.04972e-07	1.47729e-06
TMEM26	54.418	-3.1175	0.319504	-9.75734	1.71599e-22	1.01603e-21
ZNF652	302.989	-3.10363	0.145519	-21.328	6.2466e-101	1.42075e-99
KCNA6	85.1916	-3.08961	0.255143	-12.1093	9.42729e-34	7.66535e-33
RNF207	28.2051	-3.07734	0.425747	-7.22809	4.89838e-13	2.01366e-12
DTX4	119.466	-3.07453	0.220625	-13.9356	3.85172e-44	3.9953e-43
DBP	128.015	-3.05905	0.211913	-14.4354	3.09676e-47	3.37912e-46
LINC00528	183.903	-3.04234	0.177572	-17.133	8.41331e-66	1.25567e-64
FGD5	62.8705	-3.03668	0.290468	-10.4544	1.39827e-25	9.12261e-25
SOSTDC1	363.16	-3.02706	0.128312	-23.5914	4.72062e-123	1.31355e-121
LOC101928004	41.3333	-3.02324	0.34891	-8.6648	4.52297e-18	2.29762e-17
FZD2	128.529	-3.00427	0.210084	-14.3003	2.17841e-46	2.35428e-45
S1PR5	53.2548	-2.99331	0.312015	-9.59347	8.51682e-22	4.91548e-21
ARHGAP29	10.5819	-2.98869	0.57945	-5.1578	2.49869e-07	7.44248e-07
VSX1	5.58653	-2.98746	0.655027	-4.56083	5.09526e-06	1.38556e-05
LIMS2	1089.03	-2.97762	0.157644	-18.8883	1.42284e-79	2.55672e-78
PRR7-AS1	44.854	-2.97687	0.336089	-8.8574	8.19029e-19	4.26618e-18
WT1	113.05	-2.96446	0.221795	-13.3658	9.58506e-41	9.22199e-40
RHOU	446.697	-2.95782	0.115141	-25.6887	1.56444e-145	5.26111e-144
RAB37	429.955	-2.94684	0.11807	-24.9584	1.73105e-137	5.52314e-136
LRRC20	467.319	-2.94669	0.11405	-25.8367	3.42948e-147	1.16415e-145
LPP-AS2	8.44507	-2.93827	0.60412	-4.86372	1.15197e-06	3.28493e-06
ACVR2B-AS1	63.1735	-2.92597	0.285264	-10.2571	1.09987e-24	6.98861e-24
DHRS13	380.298	-2.91869	0.124499	-23.4435	1.54149e-121	4.22423e-120
CYP26A1	98.5044	-2.90737	0.23151	-12.5583	3.58026e-36	3.10398e-35
GAS2L1	1763.62	-2.90614	0.0651831	-44.5842	0	0
BHLHE23	68.1457	-2.8996	0.274652	-10.5574	4.69682e-26	3.12182e-25
FBLN5	12.942	-2.896	0.54363	-5.32715	9.97677e-08	3.04496e-07
GPR17	1094.73	-2.88534	0.148929	-19.3739	1.2811e-83	2.4302e-82
CD1D	662.834	-2.85727	0.0936762	-30.5016	2.48262e-204	1.22162e-202
AMPD3	253.425	-2.85388	0.14589	-19.5619	3.26595e-85	6.34191e-84
[truncated: 5,492 more rows]
